# Supplementary material for: Effects of Space Flight on Mouse Liver versus Kidney: Gene Pathway Analyses
Source: Int J Mol Sci. 2018 Dec 18;19(12):4106. doi: 10.3390/ijms19124106 (PMC6321533; doi:10.3390/ijms19124106)
Supplement: Supplementary file 1 [file ijms-19-04106-s001.zip]

Archive with 4 entries (4 files):
- Suppl Table S1 Affymetrix data.xlsx
- Suppl Table S2 GSEA all data.xlsx
- Supplementary Figure S1.pdf
- Supplementary Figure S2.pdf
