# Supplementary material for: Effects of Space Flight on Mouse Liver versus Kidney: Gene Pathway Analyses
Source: Int J Mol Sci. 2018 Dec 18;19(12):4106. doi: 10.3390/ijms19124106 (PMC6321533; doi:10.3390/ijms19124106)
Supplement: Supplementary file 1 [file ijms-19-04106-s001.zip › Suppl Table S1 Affymetrix data.xlsx]

## Sheet: Sheet1 (2)
ID	Gene Name	Kidney: log fold change space-flown/ground-control	Liver: log fold change space-flown/ground-control	Kidney Average Expression	Liver Average Expression	Kidney tvalue	Liver t-value	Kidney p-value	Liver p-value	Kidney adjusted .p-value	Liver adjusted p-value
100001_at	Cd3g	-0.0287828	-0.0755355	5.60694	4.94214	-0.295909	-1.12483	0.773109	0.287824	0.983753	0.698882
100002_at	Itih3	0.13356	0.52153	6.33781	11.3833	1.28086	4.61325	0.227996	0.00105061	0.879754	0.0535511
100003_at	Ryr1	0.00462111	-0.158494	5.68713	5.27383	0.0438915	-1.5611	0.96582	0.150619	0.998172	0.571364
100004_at	Ints7	-0.0053386	0.130972	7.0047	7.34691	-0.0586349	1.52631	0.954351	0.158973	0.997651	0.583454
100005_at	Traf4	-0.135699	-0.315117	8.56007	7.67426	-1.73031	-3.30009	0.11301	0.00838473	0.787103	0.176753
100006_at	Cdh11	-0.0542735	-0.00892687	4.28378	3.49141	-0.528143	-0.125796	0.608455	0.902472	0.965979	0.977059
100007_at	Irf2bp1	-0.180437	-0.157898	9.07915	8.51569	-2.66918	-2.66154	0.0227532	0.0245016	0.50755	0.290852
100009_r_at	Sox2	-0.0771645	-0.111344	4.05827	3.65113	-0.580256	-1.51105	0.574066	0.162764	0.965979	0.589499
100010_at	Klf3	0.183914	0.921569	7.80246	8.18019	1.69356	10.4937	0.119965	1.35151e-06	0.797296	0.00102592
100011_at	Klf3	-0.12691	1.04658	7.95719	7.81755	-1.28642	7.25247	0.226123	3.30222e-05	0.879754	0.00631687
100012_at	Laptm5	0.0316959	0.350551	8.96127	8.69032	0.262405	2.14534	0.79812	0.0584463	0.983753	0.405262
100013_at	Ifi35	0.141061	0.303985	7.67884	8.2364	1.09651	1.82521	0.297531	0.0989808	0.907907	0.490458
100014_at	Tlk2	-0.200307	0.144608	5.26763	4.57569	-2.3554	2.02483	0.0392962	0.0713919	0.621952	0.432079
100015_at	Yes1	-0.166596	-0.193823	6.61381	6.40896	-1.79934	-2.2127	0.100927	0.0522252	0.77212	0.389832
100016_at	Mmp11	-0.0924181	-0.177152	5.86208	5.4912	-1.31252	-2.60063	0.217499	0.0271608	0.874789	0.302535
100017_at	Mybph	-0.0355555	-0.0195997	5.75267	5.33246	-0.396918	-0.173169	0.69943	0.866092	0.978151	0.967108
100018_at	Mtf1	-0.0335036	-0.123806	8.23996	7.81209	-0.473172	-1.77619	0.64584	0.107133	0.971884	0.505238
100019_at	Vcan	-0.0693992	-0.094858	6.84367	6.23426	-0.594472	-0.905111	0.564871	0.387416	0.963647	0.753976
100020_at	Slc4a2	0.0132057	-0.00496199	8.44069	7.84429	0.141705	-0.0611352	0.890013	0.952497	0.992489	0.98983
100021_at	Chrna1	-0.0658597	-0.114233	5.66483	4.9764	-0.666279	-0.977206	0.519701	0.352295	0.954047	0.73654
100022_at	Cish	-0.285048	-0.25955	8.2968	8.05408	-3.11069	-3.44837	0.010529	0.00656368	0.358164	0.157933
100023_at	Mybl2	-0.0585163	-0.0203649	7.64057	7.44109	-0.766881	-0.295751	0.460162	0.773678	0.943606	0.935777
100024_at	Shroom3	-0.607215	-0.687325	8.21623	6.25465	-3.72302	-3.28399	0.00368212	0.00861174	0.216898	0.178941
100026_at	Bcat1	0.0766442	-0.0172862	7.7935	7.24227	0.502607	-0.295065	0.625685	0.774186	0.966715	0.935777
100027_s_at	Pex14	0.18853	0.224408	9.28414	9.38882	2.29189	2.25332	0.043858	0.0487891	0.640441	0.380023
100028_r_at	Pex14	0.0056597	-0.0624747	8.11365	8.20491	0.049572	-0.564601	0.9614	0.585211	0.998172	0.861534
100029_at	Pex14	0.032124	0.0173195	10.8268	10.5401	0.394158	0.286447	0.701405	0.780583	0.978151	0.937859
100030_at	Upp1	-0.0201408	-0.109273	7.79977	6.75794	-0.217018	-1.37535	0.832382	0.200064	0.983851	0.629207
100032_at	Sp1	-0.00795948	-0.000681608	7.96753	7.46488	-0.0442822	-0.00399059	0.965516	0.996897	0.998172	0.999263
100033_at	Msh2	-0.167042	-0.00735378	7.23021	6.60937	-1.4718	-0.0875755	0.1706	0.932002	0.845501	0.985513
100034_at	Serpinb5	-0.0126817	-0.0615385	4.4771	3.97149	-0.147835	-0.935388	0.885293	0.372373	0.990329	0.744743
100035_at	Npr1	-0.0940304	-0.00397669	3.95897	3.68267	-1.10786	-0.0419635	0.292823	0.967382	0.905915	0.992171
100037_at	Ddx18	-0.0421102	0.173095	5.91218	5.51669	-0.287417	0.876371	0.779424	0.402088	0.983753	0.764025
100039_at	Cnpy2	0.0674586	-0.113596	9.52962	9.39959	0.849858	-1.04386	0.41449	0.321958	0.93418	0.721613
100040_at	Mrpl17	0.0125137	0.142991	6.8765	6.84789	0.134196	1.19939	0.895802	0.258957	0.993879	0.680565
100041_at	Slc25a39	0.100786	-0.0762234	11.3145	10.7965	0.988244	-0.747435	0.345409	0.472596	0.916577	0.800592
100042_at	Hagh	0.0683851	0.121666	9.86184	10.2216	0.580297	0.740839	0.574039	0.476406	0.965979	0.80311
100043_f_at	Psapl1	-0.100222	-0.0727923	7.92114	7.72746	-1.47052	-0.851868	0.170938	0.414899	0.845501	0.772055
100044_at	Cldn11	0.0290821	-0.138748	4.91616	4.31766	0.207511	-1.60624	0.839608	0.140364	0.984184	0.557712
100046_at	Mthfd2	-0.148551	0.0885383	7.62394	5.51705	-1.69642	1.1282	0.11941	0.286468	0.797204	0.697593
100047_at	Snap25	-0.071175	-0.0600429	4.38046	4.04278	-0.91706	-0.523461	0.379832	0.612445	0.925848	0.873647
100048_at	Rap1a	-0.0954771	0.149524	6.36722	6.06139	-1.09239	1.25946	0.299255	0.237432	0.908464	0.665258
100049_at	Hmga1	0.00884083	0.00349571	4.06315	3.84334	0.116951	0.0606335	0.90912	0.952887	0.995549	0.989987
100050_at	Id1	0.453962	-0.00261632	8.70913	7.57561	2.46324	-0.0216485	0.0325866	0.983169	0.579177	0.995986
100051_at	Stom	-0.0623374	0.0543994	9.83136	9.69714	-0.779702	0.843912	0.452899	0.419119	0.941433	0.773797
100052_at	Stom	0.0874562	-0.0611884	6.77762	6.30925	1.10709	-0.73206	0.29314	0.481508	0.905915	0.805827
100054_s_at	D2Wsu81e	-0.0184813	0.0642223	7.22043	6.86277	-0.245886	0.789882	0.810543	0.448544	0.983851	0.7886
100056_at	Fbxw2	0.166056	0.186936	8.01455	7.73289	1.95836	2.0992	0.0774648	0.0631126	0.746981	0.417436
100057_at	Nsmce1	0.219378	0.161083	7.32559	6.57686	2.37944	1.16044	0.0376927	0.273736	0.608978	0.68899
100058_at	Fam220a	-0.132744	-0.14367	7.35908	6.55589	-1.56831	-1.93995	0.146629	0.0820994	0.822581	0.458321
100059_at	Cyba	0.203783	0.333036	11.5682	8.34807	1.55736	1.14525	0.149193	0.279676	0.825487	0.693731
100060_i_at	Klk1	-0.0499439	0.0569234	3.65573	3.36846	-0.546269	0.848348	0.596375	0.416762	0.965979	0.772803
100061_f_at	Klk1	-0.0105159	-0.0580644	13.3101	5.90564	-0.123916	-0.84036	0.903738	0.421012	0.994689	0.774771
100062_at	Mcm3	0.0545984	0.154698	5.77592	4.88446	0.416499	2.05913	0.685489	0.0674524	0.975946	0.427129
100064_f_at	Gja1	0.0941822	0.232173	7.04981	5.99014	0.428763	2.60092	0.676818	0.0271474	0.975344	0.302535
100065_r_at	Gja1	-0.0233451	0.096747	3.34439	3.22146	-0.226742	1.11382	0.825007	0.292293	0.983851	0.702333
100066_at	Gart	-0.0029777	0.004047	7.33342	7.06449	-0.0335525	0.0352932	0.973868	0.972564	0.999391	0.99274
100067_at	NA	-0.0623077	0.040402	6.56933	6.17617	-0.891125	0.572848	0.392959	0.579831	0.927475	0.858542
100068_at	Aldh1a1	0.185441	-0.168487	6.68688	11.8266	0.98175	-1.33702	0.348452	0.211836	0.916955	0.639967
100069_at	Cyp2f2	0.110925	-0.290139	6.57315	11.1709	1.07381	-0.975828	0.307127	0.352944	0.909045	0.736562
100071_at	NA	-0.124204	-0.126517	7.93126	7.51079	-1.58177	-1.45393	0.143531	0.177658	0.820402	0.608367
100072_at	Ciao1	0.0584579	0.0651706	9.13562	8.3499	0.684104	0.529188	0.508826	0.608615	0.954047	0.872436
100073_at	N6amt2	-0.230893	-0.00997656	6.35041	5.8512	-1.62492	-0.0537216	0.133988	0.958251	0.810287	0.991459
100074_at	Tmed9	-0.080777	0.0680732	7.61578	6.9643	-0.839417	0.585281	0.420063	0.571771	0.936406	0.854714
100078_at	Apoa4	0.0091506	-0.316103	7.98424	10.4424	0.104619	-1.85616	0.918663	0.0941345	0.995898	0.482472
100079_at	Ndufb9	0.121658	-0.107202	11.0176	10.3491	1.0732	-0.981659	0.307388	0.350205	0.909045	0.735994
100080_at	Bpifa2	-0.0354031	-0.00044813	7.06422	6.72976	-0.358288	-0.00391355	0.727275	0.996957	0.979115	0.999263
100081_at	Stip1	-0.0287179	-0.206691	6.44261	6.367	-0.112417	-1.16938	0.912627	0.270285	0.995844	0.686717
100082_at	Hnf1a	0.0210758	-0.0327146	7.80405	7.36746	0.252117	-0.487194	0.805851	0.636982	0.983753	0.885127
100084_at	Ezr	0.250591	0.0919753	9.47595	5.6492	3.11679	1.28422	0.0104178	0.228997	0.358164	0.655601
100085_at	Ggt1	0.0869017	-0.237704	7.74785	5.72888	0.587115	-3.81134	0.569619	0.00364009	0.964618	0.118525
100086_at	Lrpap1	0.0891659	0.0682873	9.24865	8.2017	1.16586	0.996887	0.269645	0.343126	0.896598	0.73125
100088_at	Ppp1cb	-0.159566	0.0488808	7.58705	6.78239	-0.629889	0.193347	0.542322	0.85069	0.958511	0.963022
100089_at	Ppic	0.0255017	0.0924216	9.48774	5.10874	0.220545	0.8885	0.829705	0.395849	0.983851	0.759853
100091_at	Slc35b1	0.122815	0.23404	9.89284	9.77332	1.16569	2.38184	0.269709	0.0393058	0.896598	0.353201
100093_at	Cdk16	0.0129408	0.124489	8.56071	7.56286	0.12167	1.80873	0.905473	0.101656	0.994689	0.493959
100094_at	Supt5	0.228787	0.718371	8.41003	7.82224	2.12185	6.16534	0.0587289	0.00012277	0.686068	0.0126913
100095_at	Scarb1	0.0178455	0.416899	8.46043	10.263	0.222459	2.93131	0.828254	0.0155363	0.983851	0.241015
100099_at	Smpd1	0.135788	-0.0927475	10.8999	9.68599	1.5899	-1.18317	0.14169	0.26503	0.816598	0.683925
100100_at	Serpinb1a	-0.0199989	0.0688841	5.1992	4.35567	-0.253088	0.911358	0.80512	0.384277	0.983753	0.751465
100101_at	NA	0.0777432	-0.0218312	9.09675	8.4229	0.697556	-0.134805	0.500712	0.895532	0.954047	0.97476
100103_f_at	2210010C04Rik	-0.0732524	-0.0220987	8.71351	8.2979	-0.633839	-0.310866	0.53984	0.762504	0.9583	0.932114
100104_r_at	2210010C04Rik	-0.0949347	-0.10547	4.25447	3.77338	-1.2835	-1.17869	0.227105	0.26673	0.879754	0.684952
100106_at	Tff3	0.0628866	-0.0295207	8.2734	8.60282	0.661743	-0.25314	0.52249	0.805463	0.954047	0.947318
100109_s_at	Krt13	0.0272061	0.073938	5.55436	5.16687	0.272595	1.00218	0.790487	0.340689	0.983753	0.73125
100112_at	Cxcl12	-0.111601	0.0836819	8.82897	9.45834	-0.890037	0.711695	0.393516	0.493476	0.927547	0.812462
100113_s_at	Kifap3	-0.0402549	0.0621471	7.16498	5.63331	-0.639256	0.71902	0.536446	0.48915	0.956746	0.809394
100115_at	Qrich1	0.0394553	0.305899	7.29133	6.825	0.455592	2.4394	0.658023	0.0356685	0.973856	0.338987
100116_at	2810417H13Rik	-0.023865	0.196733	6.48199	5.01101	-0.146858	1.7242	0.886045	0.116446	0.990416	0.521961
100117_at	Diablo	-0.0404705	-0.00196638	4.83127	4.03884	-0.418228	-0.0212679	0.684263	0.983465	0.975946	0.995986
100120_at	Nid1	-0.188767	0.0919861	3.9275	3.57244	-1.6135	0.996652	0.136457	0.343234	0.813251	0.73125
100122_at	Gnb5	0.0605873	-0.129655	6.0698	5.20253	0.783931	-1.6691	0.45052	0.127118	0.940698	0.5385
100123_f_at	Itgb1	-0.0173051	0.0557085	11.3454	10.5195	-0.147488	0.568537	0.88556	0.58264	0.990329	0.859236
100124_r_at	Itgb1	-0.0337035	0.0838124	8.44009	7.76786	-0.235659	1.08108	0.818261	0.305902	0.983851	0.711001
100125_at	Pa2g4	-0.175478	0.349686	5.58502	5.22103	-1.4455	3.323	0.17769	0.00807242	0.854364	0.172617
100126_at	Chrac1	0.507373	0.286568	8.24911	7.64902	5.1682	3.2932	0.000367305	0.00848118	0.0547821	0.178005
100127_at	Crabp2	0.0728819	0.0893087	4.34692	3.90698	0.819704	1.17033	0.430722	0.269921	0.939178	0.686717
100128_at	Cdk1	-0.0908707	0.119305	8.04903	7.06938	-0.640573	1.65117	0.535622	0.130776	0.956222	0.544072
100130_at	Jun	0.287715	0.815288	7.2689	6.69103	2.58279	4.64371	0.0264584	0.00100396	0.540524	0.0521564
100131_at	Scg5	-0.00710981	-0.0138471	5.70761	4.20293	-0.0670991	-0.168342	0.947772	0.869785	0.996235	0.968054
100133_at	Fyn	0.0787864	0.346759	6.49287	6.13617	0.969341	2.42929	0.354321	0.0362828	0.918336	0.34222
100134_at	Eng	0.0337313	0.0735739	10.7842	10.4894	0.277366	0.686037	0.78692	0.508813	0.983753	0.822097
100136_at	Lamp2	-0.124684	0.0848891	9.73511	9.78755	-0.979136	0.94417	0.349682	0.368089	0.916955	0.74367
100138_f_at	Rbm14	-0.511799	-0.417607	7.11624	6.3978	-5.70015	-5.32076	0.00016922	0.000378554	0.037074	0.0288508
100139_at	Pcsk1n	-0.0117109	0.00993487	6.41676	6.37535	-0.177187	0.155894	0.862756	0.879325	0.986536	0.971156
100141_at	Fau	0.0341038	0.0122427	6.59718	6.10872	0.342729	0.167164	0.738611	0.870687	0.979115	0.968223
100142_at	Dgcr2	-0.101364	-0.0583517	8.05008	7.87239	-0.818525	-0.780449	0.431365	0.453818	0.939358	0.790351
100143_at	Zyx	-0.0716107	0.0582032	6.40959	6.09029	-0.757231	0.558608	0.465677	0.589137	0.945453	0.86311
100144_at	Ncl	0.188492	0.635374	9.12322	8.42078	1.58534	3.9586	0.14272	0.00287864	0.819929	0.101837
100147_at	Aco1	-0.0339283	-0.0694737	6.33954	6.06432	-0.389004	-1.09973	0.705098	0.298089	0.978151	0.706455
100148_at	Ctcf	-0.103687	0.166607	6.76986	6.25868	-0.85412	0.961218	0.41223	0.359876	0.932663	0.741116
100149_at	Mcm6	-0.0987184	-0.0233987	4.80548	4.3107	-1.31664	-0.291514	0.216163	0.77682	0.874789	0.936292
100150_f_at	Ins2	0.132302	0.0559547	4.76757	4.07518	1.61592	0.513455	0.13593	0.619166	0.8122	0.877127
100151_at	Serinc3	0.156075	0.628786	10.5846	9.55521	1.47575	5.59108	0.169555	0.000261187	0.844716	0.0215785
100152_at	Ncam1	-0.0954764	-0.0182895	5.52236	5.31977	-1.34855	-0.309314	0.206039	0.763649	0.867292	0.932114
100153_at	Ncam1	0.157754	-0.0100318	7.54582	6.0578	2.00753	-0.16579	0.071309	0.871739	0.729245	0.968439
100154_at	Tapbp	0.11651	0.412174	7.97847	8.92665	0.580573	3.11329	0.57386	0.0114461	0.965979	0.20154
100155_at	Ddr1	-0.0948245	-0.100259	8.84413	6.1472	-0.880123	-1.05296	0.398622	0.317977	0.930056	0.719587
100156_at	Mcm5	0.0391045	-0.0154596	8.11972	7.24297	0.268575	-0.199032	0.793496	0.846363	0.983753	0.961939
100213_f_at	Rpl41	0.080738	0.132514	13.7845	13.3629	0.763556	1.01829	0.462057	0.333356	0.943646	0.726378
100225_f_at	Psmc3	0.0688486	0.0342509	7.47382	6.82242	0.848778	0.515165	0.415064	0.618015	0.934418	0.876522
100272_at	Kdm5d	-0.0899218	-0.0173963	5.47794	4.873	-1.05755	-0.209315	0.314144	0.838549	0.910638	0.95944
100277_at	Inhba	-0.0581019	-0.580479	6.97391	7.11653	-0.583781	-3.4263	0.571778	0.00680631	0.965979	0.159944
100278_at	Cdkn1b	-0.0799548	-0.0549378	5.82089	5.2239	-0.976991	-0.608322	0.350694	0.557	0.916955	0.84559
100279_at	St3gal2	-0.0705008	0.0838159	5.54263	4.70282	-0.586525	1.27402	0.570001	0.232443	0.964618	0.658818
100280_at	Hist1h1t	0.00615388	0.0128059	5.57304	5.24711	0.0928873	0.153547	0.927754	0.881126	0.995898	0.971259
100281_at	Gmcl1	-0.116735	-0.00566965	5.68432	4.91186	-1.64212	-0.0913563	0.130343	0.929075	0.8093	0.984787
100282_at	Htr7	0.0221989	0.0229686	7.65217	7.04835	0.295971	0.270672	0.773063	0.792336	0.983753	0.941082
100283_at	Sox10	-0.0652648	-0.0323467	7.28433	6.72607	-0.78652	-0.379458	0.449067	0.712553	0.940698	0.915569
100284_at	Zic4	-0.00690097	-0.0985128	5.62241	5.00655	-0.0777123	-1.43353	0.939528	0.183257	0.995898	0.61225
100285_at	Col4a3	0.0410978	0.00376446	5.63025	4.97349	0.344773	0.0538073	0.737118	0.958185	0.979115	0.991459
100286_at	Mst1	-0.0695477	0.0639802	6.05083	8.59611	-0.834525	0.678336	0.422691	0.513474	0.936581	0.824295
100287_at	Igbp1b	-0.0058826	-0.0805645	5.84764	5.52384	-0.0475803	-1.05037	0.96295	0.319107	0.998172	0.719827
100289_at	Efna3	-0.0229217	-0.161254	9.51548	9.28359	-0.285739	-2.52267	0.780674	0.0309878	0.983753	0.318162
100290_f_at	Haus6	0.0770584	0.000131314	5.0734	4.1587	0.479431	0.000799405	0.641528	0.999378	0.971594	0.999649
100291_at	Cbl	-0.160438	-0.173003	7.47151	6.77446	-1.64675	-1.80228	0.129376	0.10272	0.808703	0.494907
100292_at	Sh2d2a	0.00989173	-0.0305793	8.79941	8.32218	0.106266	-0.323043	0.917388	0.753544	0.995898	0.930711
100293_at	Cd59b	0.0575602	-0.150729	7.84808	7.40125	0.411338	-1.46826	0.689152	0.173815	0.976569	0.602611
100294_at	Dffb	0.0296652	0.120415	5.90507	5.49841	0.341157	1.56503	0.73976	0.149701	0.979115	0.569391
100295_at	Iglv1	-0.0363958	-0.133258	8.69967	8.08972	-0.403202	-1.70706	0.694943	0.119675	0.977735	0.528959
100296_at	Tex2	-0.0796208	0.0425289	8.87265	8.3684	-1.01389	0.531901	0.333582	0.606805	0.913091	0.87166
100297_at	Wdr26	0.382894	0.404248	7.96534	7.4862	3.48218	2.09804	0.00554486	0.0632337	0.271546	0.417436
100298_at	Pspn	-0.0187752	-0.0111566	8.13349	8.32897	-0.299124	-0.167232	0.770722	0.870635	0.983753	0.968223
100299_f_at	Igk-V28	-0.0114317	0.0095473	5.24042	5.11612	-0.157841	0.135207	0.877597	0.895223	0.988109	0.97476
100300_at	Cybb	-0.0484056	0.0790015	5.8059	5.32493	-0.391479	0.564351	0.703324	0.585375	0.978151	0.861539
100301_at	Esrrb	-0.0120481	-0.0388446	6.93941	6.33277	-0.143022	-0.568879	0.888999	0.582417	0.992031	0.859236
100302_at	Maff	0.0520733	-0.0614116	6.3483	6.19291	0.723115	-0.923708	0.485512	0.378126	0.95112	0.74815
100303_at	H2-M10.1	-0.155371	-0.128269	6.92817	6.62071	-1.58861	-1.41181	0.141979	0.189386	0.817293	0.616589
100304_at	H2-M10.1	-0.0681236	-0.129753	8.53994	7.92491	-0.513788	-1.91488	0.618111	0.0855398	0.966285	0.464646
100305_g_at	H2-M10.1	-0.0109099	0.0332138	8.79173	8.66012	-0.123785	0.233167	0.903839	0.820496	0.994689	0.953039
100306_at	Arl14ep	0.0845256	-0.0304986	5.0668	4.24252	1.14817	-0.44292	0.276557	0.667573	0.899198	0.898986
100307_at	Nfix	-0.109603	-0.374548	7.01461	7.77047	-0.673621	-2.12985	0.515205	0.0599747	0.954047	0.408644
100308_at	Col8a1	0.124373	-0.049814	6.98334	5.94461	1.38829	-0.833453	0.19399	0.42471	0.86327	0.776087
100309_at	Met	-0.0043693	-0.257114	5.19117	4.55241	-0.0509027	-2.7532	0.960365	0.0209837	0.998172	0.277293
100311_f_at	Ear1	-0.101427	0.207165	4.99886	4.75013	-1.16209	1.51013	0.271105	0.162995	0.896754	0.589803
100313_at	Itga8	-0.082651	0.0326683	4.38656	4.13538	-0.893782	0.495399	0.3916	0.631389	0.927274	0.882818
100314_f_at	Itga8	0.0416392	0.0524007	5.68833	5.67361	0.56533	0.596576	0.583807	0.564504	0.965979	0.850179
100315_at	Atp8a1	-0.171205	-0.0846015	6.48569	5.89477	-1.88701	-0.881915	0.0872864	0.399227	0.755858	0.7629
100317_at	Ppef2	-0.0278599	-0.168317	4.65168	4.37389	-0.437909	-1.67039	0.670384	0.126859	0.9746	0.5385
100318_at	Dnajb13	-0.0491772	0.00495273	8.24198	8.15568	-0.723363	0.0863954	0.485366	0.932916	0.95112	0.985513
100319_at	Il10	0.0356268	-0.0548038	5.89397	5.46455	0.494716	-0.644369	0.631057	0.534331	0.969448	0.833738
100320_at	Kpna4	-0.120429	0.0646551	4.89735	4.45108	-1.33971	0.508632	0.208804	0.62242	0.868176	0.879075
100321_f_at	2210418O10Rik	-0.0240062	0.00902706	4.12144	3.87882	-0.224315	0.0990491	0.826846	0.923124	0.983851	0.983739
100322_at	NA	-0.112539	-0.00445968	5.46118	5.36114	-0.964499	-0.0268856	0.35663	0.979098	0.918559	0.994954
100323_at	NA	-0.192068	0.367895	8.28242	7.38733	-1.4224	1.66948	0.184125	0.127041	0.857604	0.5385
100324_g_at	NA	-0.0442962	0.259982	4.53706	3.97122	-0.420143	2.14569	0.682907	0.0584114	0.975946	0.405262
100325_at	Gp49a	-0.150407	0.487993	4.34663	4.11579	-1.41008	3.28614	0.18764	0.00858103	0.859585	0.178702
100326_f_at	NA	0.0495621	-0.104658	5.72035	5.28432	0.617014	-1.45692	0.550459	0.176851	0.959895	0.607401
100327_at	Lta	-0.107631	-0.125682	8.44123	8.05595	-0.835876	-1.30549	0.421964	0.221951	0.936581	0.649571
100328_s_at	NA	-0.204127	0.0252914	7.47302	7.18533	-1.67728	0.167234	0.123165	0.870634	0.799555	0.968223
100329_at	Serpina1c	0.614439	0.00632152	7.1688	13.2561	1.78603	0.0951871	0.103161	0.926111	0.773641	0.984463
100330_at	Prdx2	-0.0211198	-0.0632365	3.99338	3.99031	-0.303365	-0.543033	0.767578	0.599407	0.982928	0.868751
100331_g_at	Prdx2	0.061478	-0.18985	10.4494	9.57147	0.848004	-1.44614	0.415476	0.179779	0.934634	0.610394
100332_s_at	NA	-0.127009	0.121927	8.18166	9.53747	-0.418816	0.355604	0.683846	0.729776	0.975946	0.922106
100333_at	Saa2	-0.00139866	0.220938	7.43637	7.80001	-0.0101284	1.31829	0.99211	0.217796	0.999683	0.644922
100334_f_at	Egfbp2	-0.118331	-0.118319	6.81372	4.9299	-1.35445	-1.55494	0.204213	0.15207	0.867292	0.573089
100335_at	Atp7b	-0.0218804	-0.102349	7.55672	7.22301	-0.216109	-1.64596	0.833072	0.131857	0.983914	0.545026
100336_s_at	NA	-0.0684383	-0.125238	7.36834	6.79506	-1.03758	-1.91702	0.322927	0.0852411	0.913091	0.463629
100337_at	Cacna1e	-0.0991762	-0.0136899	6.24589	5.44318	-1.12394	-0.161402	0.286244	0.875101	0.904212	0.969448
100338_s_at	Cacna1e	-0.0138819	-0.0240228	6.8345	6.11214	-0.166258	-0.377423	0.871133	0.714015	0.988109	0.915817
100339_at	Slc10a1	-0.0144646	0.184651	5.38528	11.7504	-0.0969818	2.84398	0.92458	0.0180009	0.995898	0.25762
100340_at	Slc10a1	0.0342798	0.320175	3.73883	4.43978	0.272032	1.89397	0.790908	0.0885119	0.983753	0.47008
100341_g_at	Slc10a1	0.0211205	0.222038	5.81035	11.6948	0.171412	1.75415	0.86718	0.110994	0.987629	0.512019
100342_i_at	Tuba1a	0.151293	-0.0539196	10.4826	9.3454	1.16213	-0.630595	0.27109	0.542929	0.896754	0.83785
100343_f_at	Tuba1a	0.38952	0.143096	10.2063	9.54666	3.82686	1.05803	0.00309211	0.315773	0.199043	0.71871
100344_at	BC026585	0.0172363	0.0516371	10.8283	9.3045	0.195865	0.639848	0.84848	0.537144	0.98545	0.834752
100345_f_at	Vamp8	0.125614	0.0284105	11.4109	10.8768	0.814561	0.245866	0.433532	0.810929	0.940487	0.949241
100346_at	Fgf9	-0.179736	0.0733581	6.00166	4.36909	-2.11294	0.937027	0.0596282	0.371571	0.687107	0.744314
100347_at	D17892	-0.0352844	0.122185	8.42406	8.87182	-0.364691	0.99034	0.72263	0.346156	0.978648	0.733299
100348_at	NA	-0.0952347	-0.0599696	5.87701	5.25301	-0.681255	-0.495868	0.510555	0.63107	0.954047	0.882745
100349_at	NA	-0.0701314	-0.0191644	5.69199	5.41958	-0.85723	-0.295732	0.410586	0.773692	0.932663	0.935777
100350_at	NA	-0.00856956	-0.0248531	5.81994	5.26137	-0.0806323	-0.289481	0.937261	0.778329	0.995898	0.937206
100351_f_at	Defa2	-0.0174516	-0.0984143	6.75332	6.47012	-0.18173	-0.893179	0.859279	0.39346	0.985889	0.758847
100352_at	Hspa4	0.165202	0.0784565	4.83161	4.86571	1.20672	0.899744	0.2542	0.390126	0.891979	0.756629
100353_g_at	Hspa4	0.189189	0.32935	7.94005	7.09118	1.27345	2.23142	0.230512	0.0506137	0.879754	0.384825
100354_at	Tbx15	-0.0970145	-0.108271	4.34452	4.47577	-0.794795	-0.966829	0.444445	0.357202	0.940698	0.739145
100355_g_at	Tbx15	-0.100993	-0.100343	7.13552	6.63203	-1.06993	-1.0389	0.30879	0.324147	0.909045	0.72253
100356_at	Gprasp1	-0.0173021	-0.0889031	7.36185	7.17978	-0.195093	-1.40423	0.849069	0.191564	0.98545	0.617672
100357_g_at	Gprasp1	-0.0357995	-0.106408	8.2903	7.54134	-0.427193	-1.52421	0.677926	0.15949	0.975344	0.583883
100358_s_at	NA	-0.0487126	-0.104501	7.61998	7.36926	-0.619199	-1.50936	0.549074	0.163188	0.95981	0.589803
100359_at	NA	-0.110712	-0.0943166	5.80952	5.14825	-1.15963	-0.852444	0.272061	0.414595	0.896754	0.772046
100360_f_at	Igh-VJ558	0.0455503	-0.113987	7.63263	7.33606	0.548558	-1.35335	0.594858	0.206751	0.965979	0.635626
100361_f_at	Igh-V3660	-0.0597064	-0.221694	5.88293	5.5089	-0.441171	-2.12847	0.668096	0.060112	0.974487	0.408644
100362_f_at	NA	0.0193108	0.0207794	7.58249	7.16963	0.274374	0.30083	0.789156	0.769916	0.983753	0.935116
100363_at	Syt9	0.081836	-0.0218416	4.88418	5.4078	1.01065	-0.220032	0.335059	0.830424	0.913091	0.957645
100364_at	Syt6	0.0232578	-0.140637	6.50325	6.04665	0.267136	-2.02464	0.794573	0.0714134	0.983753	0.432079
100365_at	Syt7	-0.0551927	-0.18394	6.74673	6.42177	-0.859431	-3.07875	0.409425	0.0121275	0.932663	0.20889
100366_at	Casp9	-0.130413	-0.0782042	7.52952	7.03719	-1.38858	-0.837646	0.193905	0.422462	0.86327	0.775901
100367_g_at	Casp9	-0.047148	-0.0379128	7.71583	7.27924	-0.675204	-0.483095	0.514238	0.639786	0.954047	0.887236
100368_at	Casp9	-0.00348954	0.0058648	5.10072	4.53632	-0.0319761	0.062284	0.975095	0.951606	0.999391	0.98983
100369_at	St6galnac6	0.0289945	-0.160563	8.08996	8.16035	0.326956	-1.59058	0.75017	0.143848	0.979894	0.56061
100370_at	Slc12a5	-0.104759	0.0153049	6.83132	6.61554	-1.26788	0.129084	0.232418	0.899938	0.879754	0.976257
100371_at	NA	-0.0524872	-0.0987271	4.57752	3.81557	-0.701959	-1.26892	0.498073	0.23418	0.954047	0.659995
100372_at	Gabrg1	-0.0517136	0.0343977	4.69251	4.45649	-0.650719	0.354858	0.529304	0.730318	0.954047	0.922194
100373_at	Slc39a1	-0.00151335	-0.11537	7.61326	7.15791	-0.017681	-1.80555	0.986227	0.102179	0.999683	0.494421
100374_at	Dmrt1	0.0119222	0.00651873	5.96667	5.4653	0.158578	0.0638495	0.87703	0.950391	0.988109	0.98983
100375_i_at	Igh-VJ558	-0.026026	0.133133	4.8208	4.46623	-0.348319	1.15456	0.734531	0.276024	0.979115	0.691433
100376_f_at	Igh-VJ558	-0.0800741	-0.140026	6.62024	6.15906	-0.845555	-1.82104	0.416781	0.0996509	0.935025	0.491805
100377_f_at	Ighm	-0.0740706	0.105068	4.41138	4.23359	-1.10963	1.40232	0.29209	0.192117	0.905915	0.617862
100378_at	NA	-0.0869785	-0.110147	6.92961	6.61712	-0.825443	-1.21961	0.4276	0.251541	0.937814	0.674938
100379_f_at	NA	0.0102043	0.0377227	11.6034	10.9414	0.0842962	0.229189	0.934417	0.8235	0.995898	0.954242
100380_at	NA	0.136771	0.0709186	9.49332	8.71874	0.943537	0.523985	0.366753	0.612094	0.922568	0.873647
100381_at	Acta1	0.00267433	0.503957	5.75081	5.5069	0.0275485	2.23442	0.978542	0.0503594	0.999391	0.384825
100382_at	St6galnac1	-0.104492	-0.0739095	5.16453	4.39152	-1.35966	-0.941588	0.20261	0.369345	0.86616	0.74367
100383_at	Rnf112	0.0863099	-0.136958	7.00469	7.21537	1.02891	-1.40654	0.326795	0.190898	0.913091	0.617108
100384_at	Hsf4	0.0278854	-0.0367418	6.35501	5.89377	0.361804	-0.444818	0.724723	0.666248	0.979115	0.89877
100385_at	Glra1	-0.0221787	-0.047619	7.57163	6.77967	-0.178056	-0.613889	0.862091	0.553464	0.986536	0.843297
100386_at	Gnaz	-0.043395	-0.10635	7.65653	7.17593	-0.545704	-1.12888	0.596749	0.286194	0.965979	0.697549
100387_f_at	NA	-0.0161799	0.0751083	3.98848	3.82394	-0.134815	0.792057	0.895325	0.447334	0.993879	0.787485
100388_at	Gnao1	-0.189692	-0.141544	7.32741	6.75674	-1.64117	-1.3738	0.130541	0.200528	0.8093	0.629318
100389_at	Colq	0.00645575	0.0511341	8.34736	8.14455	0.0681377	0.82023	0.946965	0.431851	0.996235	0.779858
100390_s_at	Bfsp1	-0.0621495	-0.143331	6.48905	6.22191	-0.517086	-1.02906	0.615886	0.328519	0.965979	0.724319
100391_at	Mapk8	-0.0517239	-0.0264583	3.88919	3.50067	-0.730282	-0.287815	0.481302	0.779566	0.95112	0.937859
100392_at	Apln	-0.129035	-0.00521614	8.08833	8.15868	-1.62456	-0.054614	0.134064	0.957559	0.810287	0.991268
100393_at	Vip	0.0555428	-0.0384192	5.38256	5.12038	0.621987	-0.548511	0.547308	0.595784	0.958799	0.867353
100394_at	Podxl	-0.0799189	-0.0680764	7.16111	7.08956	-0.976804	-1.08077	0.350782	0.30603	0.916955	0.711001
100395_at	Gli2	-0.0264516	-0.0478627	6.55089	5.83346	-0.280728	-0.66496	0.78441	0.521628	0.983753	0.827904
100396_i_at	Tyms-ps	-0.168615	0.0273236	5.76334	6.54522	-1.11964	0.222569	0.287992	0.828504	0.904411	0.956815
100397_at	Tyrobp	0.0214928	0.643873	7.51679	7.39863	0.16039	1.65818	0.875639	0.129335	0.988109	0.541447
100398_at	Kif3a	-0.0629429	-0.205188	6.36856	5.27654	-0.854823	-1.56542	0.411858	0.14961	0.932663	0.569349
100400_at	Emc2	0.0470857	0.361139	5.33781	4.61144	0.318245	1.667	0.756581	0.127541	0.979894	0.5385
100401_at	Son	0.0348632	0.10993	7.88185	7.47904	0.40286	1.44144	0.695187	0.18107	0.977735	0.611709
100402_f_at	Zp3r	-0.158778	0.0383692	5.54633	4.79445	-0.991117	0.432103	0.344069	0.675149	0.916577	0.902531
100403_at	Myl7	-0.0464315	-0.109117	6.61168	6.1859	-0.49187	-1.06791	0.633001	0.31151	0.96961	0.714964
100404_at	Ift88	-0.0556266	0.0255405	10.5541	10.25	-0.748648	0.327595	0.470618	0.750204	0.947609	0.929429
100405_at	NA	-0.0419567	-0.159645	6.92365	6.58987	-0.567984	-1.55598	0.582069	0.151824	0.965979	0.572975
100406_at	Ptpn5	0.0433235	-0.128427	6.28059	5.97984	0.594366	-1.35041	0.564939	0.207658	0.963647	0.636688
100407_at	Gal	0.0461748	-0.0415278	7.27934	7.13092	0.536461	-0.478493	0.602896	0.64294	0.965979	0.888838
100408_at	Pole3	0.178081	-0.00662499	6.97855	6.37158	1.83037	-0.0828132	0.0958899	0.93569	0.769063	0.985648
100409_at	Cdh3	-0.094451	-0.142399	9.31206	8.7087	-0.740749	-1.81844	0.475195	0.100071	0.949536	0.491805
100410_at	Larp7	0.0834976	0.103353	6.44378	6.09331	1.10132	1.27624	0.295527	0.23169	0.907567	0.657788
100411_at	Aebp1	0.180016	-0.15549	4.07266	3.65327	1.3999	-2.19094	0.190583	0.0541615	0.859981	0.393658
100412_g_at	Aebp1	0.135954	-0.152989	8.29413	6.8189	1.6733	-1.98818	0.123961	0.0758424	0.801667	0.445907
100413_at	Ylpm1	-0.142443	0.0350081	7.46996	6.82125	-1.87921	0.575763	0.0884269	0.577936	0.755858	0.857955
100414_s_at	Mpo	-0.105287	0.0653467	5.72346	5.07795	-1.39483	0.655453	0.192065	0.527471	0.860914	0.831127
100415_at	Mpo	-0.143593	-0.0165857	5.26389	4.87521	-1.56063	-0.212115	0.148424	0.836424	0.824266	0.958855
100416_at	Melk	-0.190371	-0.164679	5.49697	4.87334	-1.63038	-2.29551	0.132821	0.0454526	0.810287	0.369029
100417_at	Slc7a6	-0.10114	-0.129107	5.21901	4.61583	-1.13947	-2.21551	0.280007	0.0519804	0.900049	0.388593
100418_at	Gng2	0.0273989	0.00594757	6.00387	5.45503	0.419936	0.0763384	0.683054	0.940707	0.975946	0.987457
100420_at	Flg	-0.0294138	0.010319	7.35502	6.80101	-0.356631	0.136754	0.728479	0.894032	0.979115	0.974617
100421_at	Krt4	-0.00140863	0.0235342	8.77644	8.5879	-0.0131749	0.369267	0.989737	0.719891	0.999683	0.918566
100422_i_at	Stat5a	0.0913458	-0.175185	9.11661	8.45623	0.787619	-1.69308	0.448452	0.122369	0.940698	0.532504
100423_f_at	Stat5a	0.0649001	-0.117113	8.51027	8.24829	0.579934	-1.73307	0.574275	0.114807	0.965979	0.51871
100424_at	Ercc1	-0.0898608	-0.0441304	8.84678	8.62726	-1.05906	-0.721063	0.313488	0.487948	0.910437	0.809014
100425_at	Syk	-0.189809	-0.00553878	9.04547	8.52997	-2.2182	-0.0910752	0.0497949	0.929293	0.662001	0.984787
100426_s_at	Syk	-0.0945653	0.0416253	5.66707	5.70647	-0.979559	0.593188	0.349483	0.566678	0.916955	0.851366
100427_at	Ptpro	-0.0466215	-0.083604	6.4081	4.4039	-0.315679	-0.827498	0.758474	0.427916	0.980114	0.778645
100428_at	Lamc2	0.0166625	-0.0789963	8.29791	7.0833	0.231434	-1.13774	0.821456	0.282652	0.983851	0.694975
100429_at	Ppox	-0.0302576	0.0163929	7.03339	6.21751	-0.254673	0.135513	0.803928	0.894987	0.983753	0.97476
100430_at	Lepr	-0.0360529	-0.0527034	5.47162	4.59817	-0.39311	-0.385208	0.702155	0.708426	0.978151	0.914194
100431_at	Lepr	0.101569	0.290643	4.19056	4.28923	1.23502	1.253	0.243925	0.239674	0.885121	0.666833
100432_f_at	Mdfi	-0.0576629	-0.138562	7.38068	6.82752	-0.781592	-2.45905	0.451835	0.0345046	0.940817	0.335643
100433_r_at	Mdfi	-0.04384	-0.0435465	7.39047	6.99669	-0.618154	-0.719116	0.549736	0.489093	0.95981	0.809394
100434_s_at	Mdfi	-0.0220508	-0.173103	7.05843	7.39835	-0.241625	-2.30295	0.813756	0.0448878	0.983851	0.366858
100435_at	Lpar1	0.0330931	-0.00107707	7.72132	7.01172	0.345801	-0.0166092	0.736367	0.987086	0.979115	0.996422
100436_at	Orm1	-0.0442483	0.0354397	3.94675	10.884	-0.306675	0.127314	0.765127	0.901302	0.981702	0.976782
100437_g_at	NA	-0.0319859	-0.177604	7.75843	12.731	-0.182227	-1.18978	0.858898	0.262543	0.985889	0.683259
100438_at	Gpr19	-0.00851906	-0.11725	7.45016	6.77749	-0.106659	-1.50677	0.917084	0.16384	0.995898	0.589976
100439_i_at	Ank1	-0.0880736	-0.235077	8.94964	8.66164	-0.772157	-1.95935	0.457164	0.0795253	0.943492	0.454565
100440_f_at	Ank1	-0.0549635	-0.0058259	8.68427	8.34746	-0.556704	-0.0688081	0.589477	0.946545	0.965979	0.989211
100441_s_at	Ank1	-0.0648949	9.53857e-05	5.28996	4.56407	-0.591832	0.00134852	0.566572	0.998951	0.963647	0.999649
100442_at	Tbrg4	-0.0199102	-0.0184015	7.44041	7.51312	-0.232166	-0.242555	0.820902	0.81342	0.983851	0.949789
100443_at	Bcat2	0.0355364	-0.188574	7.80119	6.19985	0.190646	-2.24906	0.852463	0.0491386	0.9857	0.381618
100444_at	Cdk5	0.124941	-0.0828558	8.21715	7.80872	1.67514	-0.906055	0.123593	0.38694	0.800119	0.753957
100445_f_at	Sprr1b	-0.0746373	-0.00999007	4.06031	3.78599	-0.755686	-0.12626	0.466564	0.902114	0.946007	0.977059
100446_r_at	Sprr1b	-0.0254354	-0.00524816	12.0883	11.2086	-0.323646	-0.0700918	0.752604	0.94555	0.979894	0.988947
100447_at	Hyal2	-0.0792182	0.00391544	9.26232	8.88518	-1.19755	0.0585402	0.257605	0.954511	0.892401	0.990734
100448_at	Acvrl1	-0.0425296	-0.011373	7.66233	7.47841	-0.377212	-0.175001	0.713579	0.864691	0.978151	0.966691
100449_g_at	Acvrl1	-0.142088	0.0500587	6.80995	6.1493	-1.92293	0.635556	0.0822062	0.539823	0.752764	0.835729
100450_r_at	Acvrl1	-0.0413089	-0.0153945	8.83499	7.89502	-0.564236	-0.24724	0.584524	0.809895	0.965979	0.949223
100451_at	Hsf1	-0.151122	-0.113012	7.82027	7.28096	-2.07036	-1.77151	0.0641093	0.107941	0.706735	0.507136
100452_at	Klf1	-0.104001	-0.0641574	7.5776	7.21537	-1.4018	-0.898879	0.190031	0.390565	0.859823	0.756768
100453_at	Camk2b	0.0222252	0.100358	8.06325	7.86305	0.262554	1.2574	0.798008	0.238148	0.983753	0.666216
100454_at	Ptpru	0.0114	-0.0187046	9.34551	9.06065	0.131213	-0.261099	0.898104	0.799496	0.993879	0.944399
100455_at	Snap91	-0.0321324	0.033515	3.96014	3.64356	-0.348052	0.379514	0.734725	0.712512	0.979115	0.915569
100457_at	Glg1	0.0415542	-0.0473692	9.74249	8.32997	0.473566	-0.3898	0.645568	0.705137	0.971884	0.913554
100458_at	Napb	-0.218796	-0.133497	5.52325	5.02091	-1.79209	-1.30564	0.102139	0.221901	0.773641	0.649571
100459_at	Rad50	-0.0912273	-0.268501	7.06127	6.33681	-0.908523	-3.66953	0.384118	0.00457469	0.925848	0.131633
100460_at	Ctr9	-0.0511748	0.120878	6.88791	5.64214	-0.273418	0.846271	0.789871	0.417865	0.983753	0.77324
100461_at	Polr2j	-0.148014	0.0224081	8.83956	8.36794	-1.14578	0.213402	0.277498	0.835448	0.899217	0.958803
100462_at	Arf6	-0.143775	-0.0706465	6.20546	5.23995	-1.71415	-0.761042	0.116021	0.464797	0.7926	0.797087
100463_at	Csn1s2a	-0.0704417	0.0494103	5.2721	4.99472	-0.646899	0.37811	0.531678	0.713522	0.955225	0.915817
100464_at	3110043O21Rik	-0.166126	0.354643	6.07335	6.18592	-1.26329	3.80183	0.234	0.00369601	0.880336	0.11903
100465_i_at	Gm1673	0.0870745	-0.0857526	7.72981	7.17201	1.25192	-0.943169	0.237952	0.368576	0.880336	0.74367
100466_f_at	Gm1673	-0.0290933	-0.0197909	9.14404	8.64585	-0.386009	-0.282888	0.707248	0.783229	0.978151	0.938908
100467_at	Lyl1	-0.0423967	-0.00733441	6.88558	6.44781	-0.524265	-0.0625679	0.611056	0.951386	0.965979	0.98983
100468_g_at	Lyl1	-0.299427	0.137968	5.91814	5.33461	-2.5348	0.835513	0.028768	0.423605	0.557257	0.775901
100469_at	Nfya	-0.25157	-0.222379	7.46347	6.79571	-3.03602	-2.70281	0.01199	0.0228498	0.380887	0.285454
100470_at	Mapk10	-0.0633012	-0.0512526	5.89695	4.8899	-0.73449	-0.752637	0.478841	0.469605	0.950182	0.799453
100471_at	Leprel4	0.0964808	-0.0465483	6.88891	5.76752	1.00334	-0.593302	0.338413	0.566605	0.913661	0.851366
100472_at	Enah	-0.0653792	0.069385	7.69413	4.71308	-0.608344	0.741729	0.555977	0.475891	0.961241	0.80311
100473_at	Arrb1	0.08094	0.125024	7.63729	6.49465	0.921238	1.01911	0.377746	0.332987	0.924778	0.726378
100474_at	St8sia2	-0.0755831	-0.0470679	8.40266	8.49215	-0.995991	-0.68183	0.341804	0.511356	0.915129	0.823456
100475_at	Trim25	-0.131978	-0.049494	8.58129	8.45088	-0.740136	-0.275947	0.475551	0.7884	0.94956	0.940577
100476_at	Ibsp	-0.00500659	-0.00740586	4.42258	3.98603	-0.0720417	-0.0702452	0.943932	0.945431	0.995898	0.988947
100477_at	Tmem45a	0.171166	-0.0166494	5.3238	4.2204	1.92684	-0.110072	0.0816699	0.914605	0.752764	0.980646
100479_at	Dnmt3a	-0.0645245	0.00286218	5.60464	4.92198	-0.694513	0.0298297	0.50254	0.97681	0.954047	0.994441
100481_at	Col11a1	-0.04379	-0.11298	5.25901	4.77117	-0.442522	-1.63679	0.66715	0.133778	0.974487	0.547976
100482_at	Zfp598	0.00542155	-0.0339366	8.94189	8.78692	0.0572732	-0.462963	0.95541	0.65364	0.997923	0.89386
100483_at	Ifnar1	-0.210136	-0.0505054	7.42967	7.20819	-2.36003	-0.57573	0.0389824	0.577957	0.619355	0.857955
100484_at	Mmp13	-0.282744	-0.0481225	4.45341	3.82058	-1.44628	-0.522794	0.177479	0.612892	0.854364	0.873647
100486_at	Ezh1	-0.178951	-0.0931385	8.10444	6.62644	-1.61677	-0.856958	0.135745	0.412215	0.81187	0.77059
100488_at	Gba	-0.0629526	0.187711	8.33199	7.65769	-0.525946	1.58031	0.609928	0.146177	0.965979	0.563241
100489_at	Pde7a	0.116187	-0.0420608	5.79242	3.82654	0.879975	-0.645617	0.398698	0.533556	0.930056	0.833611
100491_at	Slc16a2	-0.0878926	-0.225203	8.46482	8.29636	-0.625767	-1.64579	0.54492	0.131892	0.958511	0.545026
100492_at	Ap2a2	0.0725452	0.0575109	9.20352	8.54384	0.580136	0.892968	0.574144	0.393568	0.965979	0.758937
100493_at	Hsd11b2	-0.177182	0.0238089	9.50878	6.90466	-1.79758	0.285505	0.10122	0.781283	0.77212	0.9382
100494_at	Fgf1	-0.39974	0.800737	8.39311	7.56024	-1.44534	4.44321	0.177734	0.00135721	0.854364	0.0631548
100495_at	Dvl2	-0.133549	-0.159908	7.56479	7.10993	-1.62365	-2.16208	0.134261	0.0568368	0.810287	0.400844
100496_at	Pam	-0.0764546	-0.0357609	6.19408	5.69541	-0.841962	-0.286366	0.4187	0.780643	0.935778	0.937859
100497_at	Stx3	-0.00735709	0.0107527	6.37637	6.03883	-0.0718543	0.129453	0.944077	0.899654	0.995898	0.976182
100498_g_at	Stx3	0.102926	0.03585	6.60262	5.38303	0.999781	0.462852	0.340051	0.653717	0.913661	0.89386
100499_at	Stx3	0.205898	0.341638	7.32261	4.82728	1.52631	4.96102	0.156674	0.000630412	0.835416	0.0391702
100500_at	Fadd	-0.129504	0.0228935	7.13748	6.58188	-1.53301	0.296534	0.155032	0.773098	0.834314	0.935777
100501_at	Atp4b	-0.033096	-0.120849	7.40091	6.84648	-0.407261	-1.85336	0.692051	0.0945635	0.976585	0.482472
100502_at	Pde1c	0.0121328	-0.201996	4.20539	3.88816	0.176282	-1.89655	0.863449	0.0881401	0.986536	0.469379
100505_at	Rit2	0.0301282	0.0753869	3.75366	3.44495	0.381521	0.999329	0.710475	0.342	0.978151	0.73125
100507_at	Nov	-0.0114471	-0.0722475	5.94396	5.17264	-0.129245	-0.768657	0.899622	0.460469	0.994545	0.794117
100508_at	Mfng	0.0163575	0.00221303	8.05288	7.26429	0.21226	0.0214977	0.835996	0.983286	0.984184	0.995986
100509_at	Rnf19a	-0.0872965	0.319502	7.2467	6.60574	-1.10855	2.44319	0.292535	0.0354413	0.905915	0.33845
100510_at	Sncb	-0.0506875	-0.0660038	8.12613	8.22065	-0.632262	-1.06552	0.54083	0.312536	0.9583	0.71578
100511_at	Hmha1	0.0429718	0.0210788	7.32189	7.11281	0.523531	0.155547	0.611549	0.879591	0.965979	0.971156
100512_at	Uchl5	0.0643852	-0.0366095	7.03762	6.36546	0.661319	-0.412307	0.52275	0.689111	0.954047	0.908528
100513_at	Asap1	0.111227	0.179398	8.14271	7.91011	1.29139	1.65524	0.224457	0.129937	0.879754	0.542875
100514_at	Gna13	0.0332058	0.388648	8.03574	7.33749	0.288754	4.44452	0.778428	0.00135452	0.983753	0.0631548
100515_at	Furin	0.0387237	0.308903	9.49112	9.50582	0.305871	3.40338	0.765723	0.00706833	0.981861	0.163765
100516_at	Chka	0.00287713	-0.281258	8.22981	8.11855	0.033994	-2.52054	0.973524	0.0310995	0.999391	0.318162
100518_at	Arf2	-0.101905	0.00119061	7.01371	6.39314	-0.96636	0.00886938	0.355741	0.993104	0.918559	0.998375
100521_at	Ovgp1	-0.156754	-0.0831607	6.65937	6.44116	-1.52026	-1.03901	0.158169	0.324099	0.838357	0.72253
100522_s_at	Wbp5	0.458372	0.437766	9.77692	7.66285	1.74914	2.14574	0.109591	0.0584071	0.780518	0.405262
100523_r_at	Wbp5	0.1591	0.170855	7.44109	6.67135	1.1445	1.9374	0.278005	0.0824428	0.89939	0.458595
100525_at	Trmt2a	-0.0269224	0.0271719	8.89918	8.52642	-0.398225	0.373613	0.698496	0.716758	0.978151	0.916158
100526_f_at	Adam3	0.0235765	-0.228429	4.79002	4.50842	0.250792	-1.47008	0.806848	0.173332	0.983753	0.6018
100527_at	Coa3	0.41995	-0.0402395	9.79565	9.08851	1.99674	-0.257323	0.0726194	0.802326	0.733715	0.945857
100528_at	Ube2h	-0.112142	-0.194355	8.14329	7.54959	-1.05546	-2.11748	0.315052	0.0612225	0.911537	0.411932
100529_at	Ube2h	0.00148918	-0.186002	8.5212	8.30235	0.012878	-1.60679	0.989968	0.140242	0.999683	0.557712
100530_at	Ralgds	0.0818113	-0.114895	9.24258	8.05129	1.11225	-1.40314	0.291014	0.191879	0.905828	0.617826
100533_s_at	Crem	-0.0301168	-0.235844	6.53241	6.18094	-0.334433	-3.07778	0.744682	0.0121472	0.979204	0.20889
100534_at	Tsnax	-0.0211056	-0.0226363	8.7561	8.10606	-0.199622	-0.254497	0.845616	0.804445	0.984752	0.947112
100535_at	Eif4g2	0.10081	0.32788	7.03471	5.87291	0.706046	1.99643	0.495631	0.0748175	0.954047	0.442178
100536_at	Mobp	-0.0700988	-0.0905484	4.66591	4.16902	-0.713736	-1.11166	0.491056	0.293174	0.953589	0.702804
100537_at	Cox14	0.0838555	0.0268098	5.61268	5.20548	0.907411	0.297611	0.384679	0.7723	0.925848	0.935356
100538_at	Sod1	0.105816	-0.0787847	10.1941	10.3745	0.545239	-0.34622	0.597057	0.736597	0.965979	0.924763
100539_at	Acot7	0.301615	-0.00448618	8.72581	7.66819	2.40701	-0.0468942	0.0359315	0.963552	0.598222	0.991815
100540_at	Lta4h	-0.0975073	0.0272984	8.77676	8.05479	-0.851524	0.207244	0.413605	0.840121	0.933678	0.960226
100542_at	Mep1a	0.0559983	-0.0889972	10.9739	5.27979	0.819035	-0.814992	0.431086	0.434702	0.939185	0.781286
100543_s_at	Brd7	-0.0680358	-0.118467	7.97212	7.14479	-0.660223	-1.48936	0.523426	0.168286	0.954047	0.596332
100544_at	Brd7	-0.0430203	0.0277723	5.84062	5.41517	-0.459987	0.277684	0.654967	0.787105	0.972557	0.940339
100546_at	Rbm4	-0.217507	-0.2057	5.26183	4.53755	-2.59997	-2.23813	0.0256766	0.0500471	0.536204	0.384608
100547_at	Rbm4b	-0.256934	-0.0254298	8.78615	8.49048	-3.59828	-0.382561	0.00454851	0.710325	0.249131	0.914598
100548_at	Pea15a	-0.02153	-0.0623248	9.16963	8.51681	-0.273261	-0.886192	0.789988	0.397031	0.983753	0.760681
100549_at	Hba-x	0.0268728	0.0681379	6.29654	5.54255	0.341436	0.725407	0.739556	0.485397	0.979115	0.80761
100550_f_at	Cox6c	0.0311995	-0.0117508	12.0168	11.3247	0.231746	-0.11285	0.82122	0.912459	0.983851	0.980277
100551_r_at	Cox6c	0.0286469	0.0568734	7.16119	6.94869	0.34779	0.885275	0.734916	0.397501	0.979115	0.761232
100552_at	Ifngr1	0.0598445	0.0943377	5.85032	4.86876	0.626011	1.11327	0.544766	0.292518	0.958511	0.702445
100553_at	Trim27	-0.0339204	-0.00761279	8.91219	8.43007	-0.489449	-0.08389	0.634656	0.934856	0.969965	0.985513
100554_at	Pdlim1	-0.114233	0.7259	6.58695	8.71862	-1.14923	3.95303	0.276136	0.00290419	0.899198	0.10245
100555_at	Rcan1	-0.66644	0.658984	9.23489	7.84316	-7.63918	2.99855	1.38129e-05	0.0138748	0.0059481	0.227387
100556_at	Eif4b	-0.0510131	0.0423393	5.16497	4.51926	-0.602583	0.602333	0.559662	0.560819	0.962761	0.847985
100557_g_at	Eif4b	-0.12963	0.0984956	9.40181	8.85017	-1.14435	1.18537	0.278068	0.264202	0.89939	0.683925
100558_at	Eif4b	-0.00249263	0.0334618	5.34913	4.77456	-0.0266596	0.327753	0.979235	0.750088	0.999391	0.929429
100559_at	Dhx16	-0.0353923	-0.0225674	7.68803	7.5124	-0.552037	-0.315572	0.592556	0.759036	0.965979	0.931399
100560_at	Pafah1b1	0.130604	0.158144	8.5549	7.82598	1.1183	2.45521	0.28854	0.0347291	0.904411	0.3362
100561_at	Iqgap1	-0.0741113	0.180436	7.78407	5.42338	-0.789744	1.60433	0.447263	0.140785	0.940698	0.557821
100562_at	Rangrf	0.111908	-0.101278	8.19172	7.28657	1.19101	-1.23101	0.260052	0.247439	0.893652	0.672767
100564_at	Ddt	0.426144	-0.0485949	9.97136	11.1401	2.97123	-0.297787	0.0134235	0.772169	0.404911	0.935356
100565_at	Gnpda1	-0.840909	-0.723389	8.56128	6.93874	-5.028	-9.9875	0.000453569	2.10026e-06	0.0629352	0.00117318
100566_at	NA	-0.019128	-0.202638	10.6242	6.61834	-0.100107	-0.838337	0.922158	0.422092	0.995898	0.775623
100567_at	Fabp4	-0.0877302	0.177926	6.01602	5.85686	-0.319887	1.70761	0.755371	0.11957	0.979894	0.528959
100568_at	Abce1	-0.0139319	0.305038	7.44921	7.3348	-0.0813833	1.38702	0.936678	0.196592	0.995898	0.624058
100569_at	Anxa2	0.094783	0.0497157	10.1373	8.1198	0.7936	0.45177	0.445111	0.661405	0.940698	0.897687
100570_at	Nub1	-0.154758	-0.0385516	7.82684	7.49276	-1.81181	-0.406744	0.0988737	0.693058	0.770527	0.909384
100571_at	Laptm4b	0.10266	0.103241	10.1846	8.19458	1.04559	1.2215	0.319381	0.250857	0.913091	0.674745
100572_at	Tm9sf2	0.0106663	0.0922729	8.23948	7.18104	0.0707055	0.68862	0.94497	0.507257	0.995909	0.820547
100573_f_at	Gpi1	-0.0455298	-0.291287	8.35407	7.41047	-0.385555	-2.59582	0.707575	0.0273825	0.978151	0.303142
100574_f_at	Gpi1	0.00211706	-0.251932	11.9493	11.2869	0.0170143	-1.60428	0.986746	0.140795	0.999683	0.557821
100575_at	Naa10	0.230007	-0.047473	7.21404	6.81365	1.58351	-0.270084	0.143136	0.792775	0.819944	0.94135
100576_at	Pafah1b3	0.0609738	-0.0942237	8.02373	6.68943	0.598683	-1.10543	0.562163	0.295735	0.963157	0.705201
100577_at	NA	0.112671	0.176422	4.98722	4.27732	1.16757	0.90546	0.268982	0.38724	0.896157	0.753976
100578_at	NA	0.0895709	0.00416267	8.14334	7.70658	0.968397	0.0352697	0.35477	0.972583	0.918401	0.99274
100579_s_at	Clta	0.0480024	0.198539	9.32939	8.43479	0.329175	1.64608	0.74854	0.131832	0.979894	0.545026
100580_at	Clta	-0.0532185	0.0335783	5.41212	5.11341	-0.537433	0.379643	0.602248	0.71242	0.965979	0.915569
100581_at	Cstb	0.284346	0.131109	10.5874	9.3929	2.42917	0.735477	0.0345749	0.479519	0.58927	0.80407
100582_at	Snx17	0.0914329	0.0410428	9.07697	7.89271	1.22744	0.660161	0.246644	0.524572	0.887596	0.829375
100583_at	NA	-0.306741	-0.140546	6.98373	6.79583	-2.6254	-2.14541	0.0245615	0.0584392	0.525083	0.405262
100584_at	Anxa4	-0.0222533	0.372165	8.6991	7.91158	-0.206019	2.23131	0.840743	0.0506227	0.984731	0.384825
100585_at	NA	-0.0661227	-0.0335731	6.30182	5.59739	-0.853884	-0.449246	0.412355	0.663161	0.932663	0.898314
100586_i_at	Cdip1	-0.110653	0.0883457	7.16358	8.03427	-1.07232	0.949684	0.307766	0.365418	0.909045	0.742752
100587_f_at	Cdip1	-0.15145	0.589937	5.77691	6.5771	-1.69507	2.53843	0.11967	0.0301731	0.797204	0.316108
100588_at	Psme2	0.0308853	0.107722	8.35694	8.52578	0.350968	0.871658	0.7326	0.40453	0.979115	0.765188
100589_at	Immt	0.0901818	0.0750769	6.38073	5.59921	0.927155	0.846173	0.374807	0.417916	0.923019	0.77324
100592_at	Ghitm	0.0707215	0.107183	10.1828	9.5641	0.439384	0.53994	0.669349	0.601458	0.9746	0.86983
100593_at	Tnnt2	0.132954	0.0465101	4.7899	4.57521	1.24154	0.773784	0.241605	0.45757	0.882877	0.792748
100594_at	Pigq	-0.154347	-0.193408	9.25376	7.82484	-1.19796	-1.62285	0.257451	0.136749	0.892401	0.55141
100595_at	Ptp4a2	0.270842	0.145059	9.22158	8.84759	3.3	1.60716	0.0075844	0.14016	0.324412	0.557712
100596_at	Selenbp1	0.116057	0.115882	9.86111	10.2951	0.481801	0.607108	0.639899	0.557773	0.970937	0.846265
100597_at	Gyg	-0.0498783	0.0885447	5.46183	4.9945	-0.4298	1.09245	0.676087	0.30112	0.975344	0.708193
100599_at	Atf4	0.136125	0.276443	9.69896	9.56485	1.37697	1.84507	0.197361	0.0958446	0.864181	0.483404
100600_at	Cd24a	-0.113608	0.0636606	10.0569	5.8378	-0.648025	0.481049	0.530978	0.641187	0.954781	0.88771
100601_at	Itgb5	0.0221417	-0.0656842	9.46902	9.02206	0.219268	-0.719994	0.830674	0.488576	0.983851	0.809394
100602_at	Rps15	-0.0321495	-0.0788549	4.95805	4.79625	-0.418048	-0.950762	0.684391	0.364897	0.975946	0.742752
100603_at	Dync1i2	0.107751	-0.0584009	6.91943	5.99198	1.3195	-0.414821	0.215239	0.687332	0.874789	0.908392
100605_at	Tpm2	-0.00288933	-0.108639	7.61644	7.08859	-0.0342664	-1.54134	0.973312	0.155315	0.999391	0.576933
100606_at	Prnp	-0.0725857	0.0213526	10.361	8.86251	-0.552545	0.374792	0.592221	0.715909	0.965979	0.916121
100607_at	Pld3	0.10968	0.0209084	8.55642	7.57091	1.0474	0.14785	0.318583	0.8855	0.913091	0.971724
100608_at	Sptlc1	-0.0712902	0.0783126	8.98027	7.94027	-0.772681	1.27658	0.456867	0.231572	0.943376	0.657788
100609_at	Cfb	-0.0844423	0.0196333	6.57365	6.27128	-0.656834	0.212325	0.525518	0.836265	0.954047	0.958803
100610_at	Capns1	0.106157	-0.0110161	10.5512	9.26949	1.20909	-0.108078	0.25333	0.916144	0.890804	0.98067
100611_at	Lyz2	-0.153665	0.892682	6.99063	7.26266	-0.662162	1.71756	0.522232	0.117688	0.954047	0.524079
100612_at	Rrm1	-0.0487055	-0.0535144	7.58209	7.1218	-0.525566	-0.868316	0.610183	0.406268	0.965979	0.766368
100613_at	Fkbp8	0.0457121	-0.11515	10.7477	10.4971	0.429293	-1.04193	0.676445	0.322808	0.975344	0.721893
100614_at	Mb	0.00133657	-0.0671418	5.13268	4.66594	0.0150744	-0.661347	0.988257	0.523844	0.999683	0.829375
100615_at	NA	0.0583104	-0.0189295	5.60611	5.44442	0.620696	-0.131178	0.548125	0.898325	0.95953	0.975588
100616_at	Cenpa	-0.0311182	0.0720251	6.95332	6.62945	-0.35236	0.873695	0.731586	0.403473	0.979115	0.764432
100617_at	Slc25a5	0.0898982	0.039816	7.35453	7.00775	1.02637	0.42542	0.327935	0.679848	0.913091	0.90442
100618_f_at	Slc25a5	0.229505	0.107513	10.0201	8.88234	1.738	0.530152	0.111602	0.607971	0.784293	0.871982
100619_r_at	Slc25a5	0.0333059	0.0229705	7.77414	7.08085	0.249697	0.22525	0.807672	0.826477	0.983844	0.956094
100620_at	Hpd	-0.0662665	0.0175729	8.27993	8.69465	-1.00676	0.207079	0.336841	0.840247	0.913255	0.960236
100621_at	Rnh1	0.0790574	0.0252274	9.55428	8.57186	0.778005	0.215099	0.453856	0.834162	0.942212	0.958379
100622_at	Prdx6	0.0865676	-0.00760101	8.81136	9.85938	0.703813	-0.0750098	0.496964	0.941737	0.954047	0.987855
100623_at	Clca3	-0.175676	-0.0354036	4.80701	4.64591	-2.05996	-0.479005	0.0652518	0.642589	0.706735	0.888468
100626_at	Odf2	0.320219	0.138931	5.00267	4.60637	3.00331	1.86071	0.0126932	0.0934399	0.39431	0.479999
100628_at	Ndufc1	0.125831	-0.26625	11.0985	9.83902	1.12584	-2.62343	0.285476	0.0261332	0.903358	0.298865
100629_at	Gstm5	0.0836299	-0.0813336	8.55358	6.73206	0.436416	-0.562522	0.671432	0.586572	0.974762	0.861996
100630_f_at	Gstm5	-0.0313694	-0.16507	11.6445	10.2964	-0.367153	-2.17632	0.720846	0.0555013	0.978573	0.39742
100631_r_at	Gstm5	-0.187952	-0.152093	9.92701	9.40744	-2.10847	-1.66819	0.0600847	0.127301	0.687107	0.5385
100632_at	Prkag1	0.246214	0.142815	8.52828	8.12463	3.07922	1.42817	0.0111212	0.184753	0.368145	0.613203
100633_at	Marc2	0.157696	-0.0510196	10.5845	11.237	0.785871	-0.39522	0.449431	0.701264	0.940698	0.912973
100634_at	Rdh7	0.0147539	0.102057	6.69784	11.643	0.153923	1.52386	0.880609	0.159576	0.988645	0.583883
100635_at	Sar1a	0.0362375	0.134494	10.0033	9.75745	0.285129	1.61169	0.781129	0.139168	0.983753	0.55578
100636_at	Eif4ebp1	-0.235487	-0.1117	7.14503	7.22069	-2.45384	-0.896363	0.0331236	0.391841	0.583488	0.757816
100669_at	NA	0.0257353	-0.00466439	3.4384	3.22552	0.355598	-0.0556161	0.72923	0.956781	0.979115	0.991268
100670_at	Scn9a	-0.000506654	-0.0656084	4.17556	3.73423	-0.00549405	-0.933464	0.99572	0.373316	0.999683	0.745045
100671_at	Ifna11	-0.171484	-0.249473	4.52044	3.89497	-1.95091	-2.56759	0.0784407	0.0287216	0.748904	0.31108
100672_at	Myo5a	0.0101673	-0.0048085	3.36111	3.19079	0.127596	-0.047685	0.900896	0.962938	0.994545	0.991815
100673_f_at	Klra5	0.0476011	0.0399593	5.62205	5.29073	0.516899	0.431673	0.616012	0.675451	0.965979	0.902531
100674_f_at	NA	0.0342421	-0.0539655	5.8421	5.32469	0.386903	-0.651966	0.706607	0.529623	0.978151	0.832092
100675_at	Gabrr1	0.0225563	0.0232021	5.536	5.03062	0.327697	0.32101	0.749625	0.755037	0.979894	0.930711
100676_at	Synj2	-0.229962	-0.0616381	5.53083	5.02332	-1.77204	-0.573867	0.105557	0.579168	0.774386	0.858542
100677_f_at	NA	-0.0435978	-0.0509131	6.30603	5.82174	-0.541875	-0.59439	0.599291	0.565906	0.965979	0.851142
100678_s_at	Vmn2r88	0.0444696	-0.0669661	3.83528	3.58302	0.495052	-0.986158	0.630828	0.348102	0.969243	0.735212
100679_at	Vmn2r10	-0.0359256	-0.118356	5.95368	5.38916	-0.432006	-1.53934	0.674534	0.155799	0.975344	0.57762
100680_at	Usp17la	-0.200894	-0.111105	4.23531	3.85297	-2.73539	-1.43228	0.0202672	0.183606	0.480659	0.61225
100681_f_at	NA	-0.0381961	0.000526867	11.5651	6.00575	-0.49006	0.0088777	0.634238	0.993097	0.969836	0.998375
100682_f_at	NA	-0.0624708	-0.173951	6.84099	6.19061	-0.658838	-2.09203	0.52428	0.0638691	0.954047	0.418106
100683_r_at	Igkv14-111	-0.0185648	-0.0022645	7.62806	7.15744	-0.231885	-0.0276691	0.821114	0.978489	0.983851	0.994954
100684_at	Prkcsh	0.134951	0.00209841	9.7398	9.38802	1.30571	0.0276572	0.21972	0.978498	0.876329	0.994954
100685_at	Krt1	-0.050663	0.0284404	6.17848	6.07384	-0.582726	0.388084	0.572462	0.706365	0.965979	0.913661
100686_at	NA	0.0913578	-0.049245	13.005	12.7331	0.901807	-0.341803	0.387514	0.739815	0.926146	0.925848
100687_f_at	Vmn2r37	-0.0625669	-0.0519195	4.76325	4.24983	-0.601696	-0.646527	0.56023	0.532991	0.962761	0.833611
100688_at	Crybb2	0.0693579	0.0199658	5.33497	5.2916	0.667104	0.314385	0.519194	0.75991	0.954047	0.931935
100689_at	Svs4	-0.018998	0.0847255	3.67698	3.56336	-0.208045	0.992596	0.839201	0.34511	0.984184	0.732645
100690_at	Th	-0.00606321	-0.0135562	7.30313	6.81539	-0.0822349	-0.180957	0.936017	0.86014	0.995898	0.965956
100691_at	Scn3a	-0.0147261	-0.111404	4.11169	3.84647	-0.165585	-1.18249	0.87165	0.265289	0.988109	0.683925
100692_at	NA	0.0873439	-0.0319817	6.92559	6.79211	1.14937	-0.389127	0.276083	0.705619	0.899198	0.91362
100693_at	Gabrg3	-0.122104	-0.0784164	5.49266	5.55339	-1.05801	-0.750477	0.313945	0.470845	0.910484	0.800207
100694_at	NA	0.177004	-0.00621678	13.0478	12.3872	1.91308	-0.0525386	0.0835701	0.95917	0.752764	0.991459
100695_at	Edn2	-0.182111	-0.0556218	6.55794	6.09559	-1.85405	-0.514814	0.0922024	0.618251	0.765336	0.876568
100696_at	Pde6a	0.0350187	-0.069633	7.01271	6.82582	0.308892	-0.746991	0.763487	0.472852	0.981527	0.800592
100697_at	Pax3	-0.145786	-0.0406375	6.42064	5.62741	-1.44422	-0.615467	0.178042	0.552464	0.854492	0.842976
100698_at	Prop1	-0.0657648	-0.111985	6.52877	6.30661	-0.703764	-1.09066	0.496993	0.301869	0.954047	0.708726
100699_at	Nfatc2ip	0.0111168	-0.0809569	5.3609	5.17617	0.148507	-0.943594	0.884775	0.36837	0.990329	0.74367
100700_s_at	Nr5a1	-0.0413649	-0.131384	7.11653	6.79493	-0.396195	-1.51238	0.699947	0.162428	0.978151	0.58931
100701_r_at	Nr5a1	0.00206162	-0.0863594	6.79576	6.61809	0.0230219	-1.31951	0.982067	0.217403	0.999421	0.644597
100702_at	Shbg	-0.0640157	-0.0926562	7.37274	7.10322	-0.777531	-1.42287	0.454124	0.186244	0.942212	0.613758
100703_at	Npy2r	0.00112294	-0.220831	5.03719	4.70203	0.0112883	-3.39688	0.991207	0.00714443	0.999683	0.164329
100704_at	Cmtm4	0.00869528	0.11666	4.76493	4.38251	0.11165	1.26399	0.913221	0.235872	0.995844	0.662521
100705_at	Lhcgr	-0.142214	-0.0810253	4.6529	4.45095	-1.38448	-1.20232	0.195121	0.257871	0.863872	0.679745
100706_f_at	Sfmbt2	-0.0561083	-0.0904285	4.14123	3.9726	-0.721522	-0.982104	0.486451	0.349996	0.95112	0.735947
100707_at	Sh3rf1	-0.0441436	-0.0484022	6.3878	5.6789	-0.587695	-0.453408	0.569244	0.660265	0.964574	0.897311
100708_at	NA	1.06416	1.65249	10.5155	9.98288	9.02311	13.446	3.0045e-06	1.41882e-07	0.00163131	0.000314778
100709_at	Tpbpa	-0.0362559	-0.0671315	7.67861	6.8029	-0.416459	-0.939615	0.685517	0.370307	0.975946	0.74367
100710_at	Vcp	0.0688558	-0.0593794	10.0185	9.80552	0.648294	-0.312203	0.53081	0.761518	0.954764	0.932114
100711_at	Rpl10a	0.459592	0.28481	11.0539	10.2515	4.5029	1.30088	0.00102468	0.223462	0.100757	0.650487
100712_at	Npas1	0.0315372	-0.0172542	6.71618	6.59991	0.423447	-0.296498	0.680571	0.773124	0.975502	0.935777
100713_at	Zfp617	-0.0664974	0.189147	6.51006	5.59456	-1.02207	1.70908	0.329874	0.11929	0.913091	0.528472
100714_at	Nkx3-2	0.0799577	-0.124569	6.17344	6.11202	0.947682	-1.65757	0.364735	0.12946	0.922568	0.541595
100715_at	Msmb	-0.151059	0.0627324	5.09915	4.54326	-1.45217	0.80076	0.175869	0.442512	0.851261	0.786086
100716_at	Has1	0.0385967	-0.0607846	6.05086	5.81055	0.335878	-0.747987	0.743623	0.472278	0.979204	0.800592
100717_at	U90926	-0.0924506	-0.0172865	9.10145	8.69344	-1.13902	-0.209942	0.280184	0.838073	0.900049	0.959378
100718_at	NA	0.219057	0.311808	10.2393	9.06804	2.48729	1.77695	0.0312507	0.107001	0.573926	0.505171
100719_f_at	Klk1b16	-0.0292625	-0.0319028	9.2553	5.21737	-0.29163	-0.480076	0.776289	0.641854	0.983753	0.888043
100720_at	Pabpc1	-0.0606581	-0.00939401	10.7875	10.1768	-0.570364	-0.0474872	0.580512	0.963092	0.965979	0.991815
100721_f_at	LOC382693	-0.203833	-0.162854	6.54352	6.06484	-1.31864	-1.32384	0.215514	0.216018	0.874789	0.643211
100722_r_at	NA	0.132187	0.0727255	7.93925	7.4084	0.983373	0.704788	0.347689	0.497576	0.916955	0.815664
100723_f_at	Sprr2e	-0.102216	-0.054467	10.4926	9.69206	-1.26555	-0.640373	0.233218	0.536818	0.879887	0.834752
100724_at	Zfp28	0.0413339	-0.169632	6.54393	6.57977	0.413936	-2.05194	0.687306	0.0682601	0.976569	0.427607
100725_at	NA	-0.0877999	-0.0237941	5.22417	4.72685	-1.13997	-0.344476	0.279807	0.737867	0.900049	0.925393
100726_at	Grin2a	-0.10896	0.00278308	6.09909	5.68156	-1.01286	0.0372635	0.334053	0.971033	0.913091	0.992623
100727_at	NA	0.220109	0.0645123	12.2467	11.4712	2.12761	0.89571	0.0581543	0.392173	0.686068	0.757816
100728_at	Mpdz	-0.0428696	-0.10351	6.93551	7.04667	-0.424295	-1.33393	0.679971	0.212811	0.975502	0.640535
100729_at	Gm15772	0.224845	0.325072	11.3638	10.7107	1.78942	2.53676	0.102588	0.0302588	0.773641	0.316108
100730_at	Cd180	-0.187012	-0.00364727	4.55342	4.08293	-2.34567	-0.053521	0.0399636	0.958407	0.622107	0.991459
100731_at	NA	-0.0876038	-0.087871	6.81141	6.36063	-0.964079	-1.09389	0.356831	0.300519	0.918559	0.707536
100732_at	NA	0.0904062	0.219336	11.0638	10.4204	0.792304	2.3797	0.445834	0.0394478	0.940698	0.353555
100733_at	Psma2	0.309333	0.363887	10.0714	9.80235	1.81639	1.66872	0.0981294	0.127195	0.770527	0.5385
100734_at	NA	0.20672	0.534787	11.2342	10.5498	1.16549	3.25148	0.269786	0.00908957	0.896598	0.183377
100735_at	Krtap6-3	0.00345756	0.0746962	3.4945	3.25833	0.0386916	1.18835	0.969867	0.263078	0.998611	0.683259
100736_at	Barx2	-0.15496	-0.0385804	5.76776	5.43915	-1.82813	-0.522318	0.0962453	0.613211	0.769646	0.873647
100737_at	Onecut1	0.0184137	-0.849091	6.58662	7.58467	0.226657	-4.90335	0.825072	0.000685311	0.983851	0.041145
100738_at	NA	-0.0902724	-0.0802979	8.44548	7.94304	-0.915585	-0.746773	0.38057	0.472978	0.925848	0.800592
100739_at	Spi16	-0.207797	-0.00484973	4.6237	4.58704	-2.2336	-0.0491637	0.0484933	0.96179	0.657647	0.991815
100740_at	Gp5	-0.0700601	0.0191081	6.35006	6.08186	-0.866097	0.282469	0.405923	0.783541	0.932346	0.939047
100741_at	Fpr3	-0.142666	0.00948943	5.10081	4.6209	-1.36109	0.111521	0.202171	0.913486	0.86616	0.980464
100742_at	AA409749	0.00787556	-0.00487145	5.66066	4.40764	0.0748472	-0.0621647	0.941753	0.951699	0.995898	0.98983
100743_at	Ino80c	0.0987418	0.0842701	6.14597	5.74393	0.947116	1.22276	0.365011	0.250404	0.922568	0.674745
100744_at	Zfp518b	-0.0873512	-0.0868075	6.32861	5.97004	-1.04342	-0.777224	0.320341	0.455631	0.913091	0.791476
100745_r_at	NA	-0.00246493	-0.0495871	3.09945	2.94166	-0.0240831	-0.491612	0.981241	0.633968	0.999391	0.883664
100746_at	NA	0.00255715	0.272371	4.63141	4.10687	0.0317769	3.56591	0.97525	0.00541417	0.999391	0.142904
100747_at	AA408954	0.0112757	-0.027799	5.58348	4.96743	0.163894	-0.445921	0.872948	0.665478	0.988109	0.89877
100748_at	D10Wsu159e	-0.00698693	-0.106513	3.8034	3.6853	-0.0677658	-1.4037	0.947254	0.191717	0.996235	0.617826
100749_at	Zbtb37	-0.0956102	-0.0493219	5.93539	5.88909	-1.24937	-0.697385	0.238844	0.501994	0.880551	0.818181
100750_at	AA414903	0.0283348	-0.011241	4.77013	4.16152	0.328209	-0.130905	0.749249	0.898535	0.979894	0.975621
100751_at	Adam10	-0.076474	-0.13242	6.12391	5.11242	-0.995725	-1.72096	0.341928	0.11705	0.915129	0.522918
100752_at	Rrh	-0.145292	-0.131664	6.2062	6.21806	-1.39676	-1.61507	0.191499	0.138431	0.860758	0.554589
100753_at	Atp5a1	0.075786	0.0571802	11.802	11.0383	0.773923	0.450554	0.456164	0.66225	0.943286	0.897764
100754_at	Mecom	-0.151264	-0.0961998	6.31565	5.41569	-1.49949	-1.31691	0.163398	0.218242	0.840449	0.64524
100755_at	Elane	-0.044181	-0.113856	7.6197	7.33201	-0.441242	-1.63905	0.668046	0.133303	0.974487	0.547661
100756_r_at	Tyms-ps	-0.0148173	-0.0167123	10.3296	9.72052	-0.154524	-0.202782	0.880147	0.843511	0.988618	0.961097
100757_at	Cacnb2	-0.0889416	0.00791151	7.27176	6.61062	-1.11761	0.0942357	0.288821	0.926847	0.904411	0.984633
100758_at	Rps28	0.118762	0.308638	12.607	12.1625	1.21856	3.03917	0.24986	0.0129599	0.889115	0.217131
100759_at	Mrc2	-0.124981	-0.122235	8.01829	7.68636	-1.51441	-1.84842	0.159626	0.0953258	0.84024	0.482472
100760_at	Dsc1	-0.000395522	-0.0350548	6.04387	5.24766	-0.00532765	-0.398341	0.99585	0.699037	0.999683	0.912092
100761_at	Strn	0.00653742	0.00156016	5.94885	5.41414	0.0860322	0.0122196	0.93307	0.990499	0.995898	0.997287
100762_at	Sema6a	-0.0177439	-0.16022	7.70512	7.41631	-0.202306	-2.27716	0.84357	0.0468753	0.984752	0.373895
100763_at	D2Ertd127e	-0.00213598	-0.142268	4.98711	4.51209	-0.0320018	-1.32696	0.975075	0.215021	0.999391	0.642185
100764_at	Il2rb	-0.0880557	-0.0378462	6.75507	6.45943	-1.10581	-0.446817	0.293666	0.664853	0.905915	0.89877
100765_at	Fndc7	-0.182405	-0.00294861	7.77489	7.08993	-2.24537	-0.0355263	0.0475209	0.972383	0.650227	0.99274
100766_at	Edn3	-0.0450534	-0.0760373	7.14057	6.68273	-0.708366	-0.887861	0.494248	0.396176	0.954047	0.76021
100767_at	NA	0.0617646	0.121894	4.50613	4.86041	0.536373	1.61428	0.602955	0.138603	0.965979	0.554589
100768_at	NA	-0.0462274	-0.16773	5.12	4.90038	-0.438569	-2.02102	0.669921	0.0718425	0.9746	0.433088
100769_at	NA	-0.0354385	0.0809928	5.02129	4.40566	-0.437608	0.94064	0.670596	0.369807	0.974674	0.74367
100771_at	Blnk	-0.0220408	-0.0388423	8.56761	6.71026	-0.306228	-0.506677	0.765458	0.62374	0.981775	0.879348
100772_g_at	Blnk	-0.0556283	0.00632578	7.01387	3.86601	-0.6971	0.0676037	0.500985	0.947479	0.954047	0.98954
100773_at	Il12a	-0.0219303	0.0527142	6.25615	5.76572	-0.315824	0.573934	0.758366	0.579124	0.980114	0.858542
100774_at	Synj2bp	-0.0577824	-0.0533704	6.79557	6.46982	-0.810264	-0.552505	0.435889	0.593151	0.940487	0.865436
100775_at	NA	-0.0265934	-0.0813009	6.18264	5.76405	-0.389479	-1.23816	0.704758	0.244894	0.978151	0.670889
100776_at	Zfp799	-0.0520407	-0.0698864	6.06598	5.72366	-0.786296	-0.826183	0.449193	0.428626	0.940698	0.778913
100778_at	Cd38	-0.0932102	-0.000974963	5.82968	5.13382	-1.46916	-0.0104024	0.171301	0.991912	0.845501	0.99787
100779_at	Il12b	0.0215553	-0.149768	7.15753	6.62727	0.286274	-2.53017	0.780275	0.0305975	0.983753	0.317564
100780_at	Rps4x	0.284013	0.538522	11.0602	10.887	1.3383	2.14881	0.209248	0.0581083	0.869225	0.404884
100828_at	Myl4	-0.110479	-0.0392963	7.57688	7.59622	-0.957839	-0.637341	0.359824	0.538708	0.920062	0.835292
100839_at	NA	0.010639	-0.0583058	8.18366	7.81276	0.133689	-0.757261	0.896194	0.466956	0.993879	0.798312
100876_at	Fez1	-0.0445582	-0.0870976	6.67039	6.02036	-0.536638	-1.40454	0.602778	0.191475	0.965979	0.617666
100877_at	1810058I24Rik	0.286949	-0.307638	9.12966	8.97248	2.46614	-1.75489	0.0324225	0.110863	0.579177	0.511812
100878_at	Strn3	-0.303679	0.0762031	7.7826	6.46443	-1.63223	0.3275	0.132427	0.750273	0.810287	0.929429
100879_at	Actn3	-0.113981	-0.158889	6.86351	6.52313	-1.46354	-1.98414	0.172801	0.076348	0.846705	0.447698
100880_at	Gbp7	-0.261907	0.00872054	7.46445	7.16468	-2.39546	0.101437	0.0366597	0.921277	0.600228	0.982234
100882_at	Defb1	0.199	-0.228083	11.1038	5.63104	0.843037	-1.84605	0.418125	0.0956925	0.935778	0.482832
100883_at	Arl4d	-0.0195717	-0.0344539	7.72203	7.2129	-0.207901	-0.419092	0.839311	0.684312	0.984184	0.906449
100884_at	Akr1b8	0.00609327	-0.00167907	8.50412	7.5805	0.0694808	-0.021341	0.945921	0.983408	0.996167	0.995986
100885_at	Nek2	-0.0882874	-0.0431461	6.99369	6.47671	-0.93405	-0.779309	0.371402	0.454459	0.922918	0.790759
100886_f_at	Mrpl45	0.0724035	-0.0811921	8.40276	7.5402	0.892505	-0.543036	0.392252	0.599406	0.927473	0.868751
100887_at	Smc6	0.0264065	0.34719	6.49374	6.33305	0.150651	3.01801	0.883126	0.0134284	0.990105	0.222702
100888_at	Sorl1	-0.0305396	-0.100624	6.31335	4.37773	-0.323464	-1.16233	0.752737	0.273001	0.979894	0.688875
100889_at	Samd4b	-0.0214155	0.0352782	9.38691	8.79033	-0.201787	0.547497	0.843965	0.596454	0.984752	0.867638
100890_at	Chaf1b	-0.0285619	0.000537134	7.02658	6.76322	-0.28158	0.00603722	0.783774	0.995306	0.983753	0.999146
100891_at	Smcp	0.00692948	0.0329919	4.81295	3.98767	0.0767554	0.505044	0.940271	0.624845	0.995898	0.879948
100892_at	Ndufaf1	0.0814883	0.0576457	7.73311	7.45712	0.586442	0.522097	0.570055	0.613359	0.964618	0.873647
100893_at	Sptlc2	0.0824094	-0.0384187	8.31992	7.28088	0.81734	-0.469822	0.432012	0.648904	0.939899	0.891917
100894_at	Orc5	-0.234369	0.0360819	6.7534	6.31509	-2.48539	0.300107	0.0313543	0.770452	0.573926	0.935116
100895_at	Lsg1	0.243508	0.329237	6.57361	6.30091	2.21077	2.94663	0.0504342	0.0151408	0.662016	0.237713
100896_at	Cacng1	-0.0218685	-0.176124	6.27115	5.85397	-0.198997	-2.37817	0.846092	0.0395494	0.984752	0.353792
100897_f_at	Zbtb22	-0.104413	0.0275259	7.09237	6.66692	-1.27501	0.306267	0.229982	0.765898	0.879754	0.933521
100898_r_at	Zbtb22	0.183758	0.0721236	6.7072	6.39224	1.47971	0.71336	0.168515	0.492491	0.843498	0.811375
100899_s_at	Zbtb22	0.48908	0.497883	7.50215	7.49381	4.34955	7.24291	0.00130953	3.33851e-05	0.122958	0.00631687
100900_at	Hcfc1	0.0531214	0.243957	8.61047	8.05355	0.534785	3.0739	0.604014	0.0122265	0.965979	0.209444
100901_at	Hcfc1	-0.0205723	0.0188422	5.46487	5.16447	-0.243506	0.2224	0.812337	0.828632	0.983851	0.956815
100902_at	Tdrp	-0.0580361	0.204772	7.57842	6.27743	-0.563853	2.13062	0.584776	0.0598971	0.965979	0.408644
100903_at	Parp2	0.191323	0.272048	7.51192	6.74719	2.27306	3.12539	0.0453068	0.0112168	0.645578	0.200107
100904_at	Mettl17	-0.144096	-0.15999	8.71379	8.4902	-2.01615	-2.44169	0.0702774	0.0355308	0.725309	0.33845
100905_at	Herc4	-0.232125	-0.197474	5.09209	4.65604	-1.66461	-1.08856	0.12571	0.302748	0.805193	0.709007
100906_at	Itgb7	-0.0670425	-0.00912288	8.26467	8.29899	-0.802605	-0.132359	0.440112	0.897416	0.940698	0.975282
100907_at	Kcne1l	-0.0597383	-0.0584595	6.87738	6.7013	-0.791017	-0.813792	0.446552	0.435357	0.940698	0.781286
100908_at	Ptpra	0.048491	-0.0335591	7.0194	6.18767	0.701782	-0.482468	0.498179	0.640215	0.954047	0.887395
100909_at	Prss8	-0.0511733	-0.14592	9.71954	8.28001	-0.448296	-2.11515	0.663111	0.0614597	0.974465	0.412417
100910_at	Surf2	0.098032	0.123771	8.78941	8.00873	1.40013	0.935597	0.190517	0.372271	0.859981	0.744743
100911_at	Gpaa1	-0.0138717	-0.0204291	8.74069	8.20614	-0.18682	-0.271841	0.855386	0.791463	0.985795	0.941082
100912_at	Dph5	-0.022912	0.256071	6.72771	6.24568	-0.258467	2.59494	0.801077	0.0274234	0.983753	0.303142
100913_at	NA	0.167308	-0.0527644	8.39107	6.11188	0.936036	-0.560785	0.370425	0.58771	0.922568	0.862637
100914_at	Gm2889	0.00110548	-0.175598	9.47187	8.95648	0.00749788	-1.89579	0.994159	0.0882496	0.999683	0.469416
100915_at	Myh9	0.0831908	-0.0283307	9.50218	8.58092	0.662393	-0.279035	0.522089	0.786098	0.954047	0.939666
100916_at	Slc22a1	0.033596	-0.304499	10.5011	10.5959	0.212247	-4.2362	0.836006	0.00186389	0.984184	0.0773298
100917_at	Wdr55	0.0712869	-0.140032	7.26587	6.60914	0.74688	-1.165	0.47164	0.27197	0.947768	0.687665
100920_at	Gm15987	-0.0117015	-0.173965	4.25562	3.8808	-0.0777206	-1.19744	0.939521	0.259681	0.995898	0.680565
100921_at	Tnni3	0.0097713	-0.0242433	6.17001	5.97941	0.148791	-0.301604	0.884557	0.769344	0.990329	0.935106
100923_at	Myo10	-0.0977027	-0.11922	7.68033	6.4058	-0.895547	-1.05799	0.390698	0.315788	0.927274	0.71871
100924_at	Gata3	-0.311394	0.04162	6.93274	4.25373	-2.44512	0.428143	0.0336297	0.677932	0.583488	0.903528
100925_at	2700089E24Rik	-0.121273	-0.033487	5.05938	4.32964	-0.914727	-0.408975	0.381	0.691474	0.925848	0.909239
100926_at	2700089E24Rik	0.0302216	-0.0656014	4.75474	4.34465	0.348102	-0.6595	0.734689	0.524979	0.979115	0.829682
100927_at	Pltp	0.0753388	-0.297375	7.3162	8.90364	0.79408	-1.18307	0.444844	0.265069	0.940698	0.683925
100928_at	Fbln2	-0.0489356	-0.150007	7.55981	6.94315	-0.485232	-1.89956	0.637545	0.0877088	0.970548	0.468625
100929_at	Mtmr9	-0.217157	-0.158944	5.393	4.87613	-2.65062	-0.948433	0.0235029	0.366023	0.514401	0.742752
100931_at	Arsa	-0.157672	0.178936	7.13205	6.46863	-1.65576	1.56351	0.127516	0.150055	0.807195	0.569572
100932_at	Capn1	-0.0775969	-0.144547	9.22619	8.14842	-0.874667	-1.51702	0.401451	0.16127	0.930056	0.587496
100933_at	Stx1a	-0.0213757	0.0372291	6.90974	6.80321	-0.230886	0.545007	0.82187	0.598101	0.983851	0.867978
100935_at	Mlx	-0.0685886	0.211004	8.55991	8.23104	-0.651747	2.56021	0.528667	0.0290824	0.954047	0.313627
100938_at	Ghrh	-0.177429	-0.0657865	6.13328	5.42811	-1.90467	-0.865856	0.0847536	0.407552	0.752764	0.766954
100939_at	Zfp282	-0.0481868	-0.0812083	6.37985	5.7599	-0.757637	-1.14567	0.465445	0.279512	0.945453	0.693731
100941_at	Pias2	-0.0611221	0.103275	8.4258	7.49519	-0.561359	0.922835	0.586413	0.378558	0.965979	0.748388
100943_at	Slc1a4	0.00633748	-0.117349	8.1353	7.2699	0.100432	-1.20572	0.921906	0.256617	0.995898	0.678599
100944_at	AW112010	-0.303839	-0.396225	6.56575	9.02637	-2.00718	-1.88613	0.0713508	0.0896511	0.729245	0.471525
100946_at	Hspa1b	-0.548703	-1.49756	8.47742	6.07482	-1.27062	-4.70707	0.231479	0.000913817	0.879754	0.0489774
100947_at	NA	0.0936994	-0.022204	7.56614	7.17931	1.40248	-0.281378	0.189834	0.784353	0.859798	0.939119
100948_at	Ank	-0.0636972	0.0122149	7.72596	7.7996	-0.746806	0.153691	0.471683	0.881016	0.947768	0.971259
100949_at	Fam20c	-0.201916	-0.41535	8.24594	7.96772	-2.26814	-3.89315	0.0456926	0.00319405	0.646655	0.108685
100951_at	Pkd2	-0.444951	-0.151578	9.19196	6.20913	-3.30632	-1.4226	0.00750204	0.18632	0.324171	0.613758
100952_at	Stim1	0.042442	0.149701	8.36977	8.48691	0.443853	2.02298	0.666217	0.0716099	0.974487	0.432848
100953_at	Timeless	-0.105875	-0.109163	8.19609	7.48731	-1.11525	-0.841799	0.289784	0.420244	0.904602	0.774183
100954_at	Agfg1	-0.141001	-0.0222302	5.95412	4.19074	-1.05358	-0.230379	0.315874	0.8226	0.911638	0.953875
100955_at	Ube2t	-0.0567051	-0.129359	4.14652	3.49398	-0.526951	-1.84687	0.609254	0.0955658	0.965979	0.48253
100956_at	Kl	-0.264425	0.0178368	9.96996	3.7998	-1.64024	0.195075	0.130737	0.849374	0.80938	0.962958
100957_at	Ssbp1	0.067706	-0.268486	7.15231	6.74192	0.455894	-1.77874	0.657813	0.106693	0.973675	0.504306
100958_at	Spata13	-0.19998	-0.41952	8.02245	7.2164	-1.57507	-3.43472	0.145065	0.00671273	0.821514	0.159839
100959_at	S100a13	-0.0317629	-0.318631	9.75833	9.46885	-0.285447	-1.92635	0.780892	0.083949	0.983753	0.46087
100960_g_at	S100a13	-0.0674198	-0.129142	9.24401	8.91607	-0.879802	-1.6061	0.398788	0.140394	0.930056	0.557712
100961_at	Kcnh2	-0.0248881	0.000440401	7.93665	7.24242	-0.379153	0.00751488	0.712181	0.994157	0.978151	0.998584
100962_at	Nab2	-0.206631	-0.219411	7.3771	7.12785	-2.62605	-1.65056	0.0245338	0.130902	0.525083	0.544175
100963_at	Pnkd	0.0926866	-0.254895	8.50616	7.43603	1.17567	-2.04727	0.265869	0.0687903	0.895745	0.427846
100964_at	Vti1b	0.152583	-0.297608	8.5217	7.95793	0.913663	-2.89774	0.381533	0.0164406	0.925848	0.246175
100965_at	Cox8c	-0.154955	-0.0760998	9.87835	9.59724	-1.76774	-0.842459	0.106305	0.419892	0.774386	0.77408
100966_at	Serpind1	0.169029	0.113367	6.50771	11.455	1.51022	1.28053	0.160678	0.23024	0.840449	0.657135
100967_at	Slc27a2	-0.0847902	0.170189	11.3136	10.1027	-0.476571	0.841762	0.643497	0.420264	0.971884	0.774183
100968_at	Cstf3	-0.127641	-0.27375	5.03621	4.73728	-1.42638	-3.34975	0.183005	0.00772281	0.857604	0.168901
100970_at	Akt1	0.138494	-0.118431	8.43319	7.51426	1.49351	-1.61443	0.16493	0.138571	0.840449	0.554589
100971_at	Tead3	-0.00687888	0.046047	7.89807	7.39188	-0.0994007	0.508786	0.922705	0.622316	0.995898	0.879038
100972_s_at	NA	-0.0945561	-0.242338	7.43539	7.02786	-1.08163	-2.23757	0.303797	0.0500947	0.908464	0.384714
100973_i_at	NA	-0.150988	-0.356472	6.70326	6.69849	-1.77709	-2.85151	0.104687	0.0177735	0.774029	0.256299
100974_at	Ssbp4	-0.000596153	0.0190509	7.97286	7.29232	-0.00435809	0.177191	0.996605	0.863017	0.999683	0.966602
100975_f_at	Ssbp4	0.0305917	-0.0939642	7.87394	6.99979	0.413753	-1.17835	0.687436	0.266857	0.976569	0.685053
100976_at	Ptpn9	-0.0461165	0.180442	9.53032	8.90991	-0.442731	1.63341	0.667003	0.134493	0.974487	0.547976
100977_at	Pdk1	-0.00957111	-0.140646	7.25561	8.85727	-0.111374	-1.33571	0.913434	0.212248	0.995844	0.639967
100978_at	Frg1	-0.000287772	0.258209	7.26232	6.79747	-0.00228946	1.65893	0.998216	0.129181	0.999683	0.541345
100979_at	Rnf138	0.221251	0.123286	6.75709	6.26276	2.22909	0.81242	0.0488706	0.436107	0.657647	0.781924
100980_at	Rock1	-0.157754	0.0591798	6.16297	5.55802	-1.49812	0.591918	0.163748	0.567494	0.840449	0.851627
100981_at	Ifit1	-0.161481	0.00805895	6.16132	6.72298	-1.04686	0.0364947	0.318821	0.971631	0.913091	0.992679
100982_at	Kctd9	0.0678043	0.0799263	6.88879	5.97559	0.945838	0.686379	0.365632	0.508607	0.922568	0.821986
100983_at	Prep	0.0915286	-0.0755123	7.14991	6.79795	0.997224	-0.808979	0.341233	0.437991	0.914446	0.782363
100984_at	NA	-0.0613933	0.0180493	7.44026	7.22617	-0.376919	0.143135	0.713791	0.889124	0.978151	0.972531
100985_at	Siah1a	0.378971	0.340832	7.80674	7.04246	4.08944	3.32357	0.00199953	0.00806472	0.161262	0.172617
100986_at	Fhl2	-0.183159	0.00528024	7.62318	6.49304	-2.88048	0.0649249	0.0157278	0.949557	0.439395	0.98983
100987_f_at	Hspbp1	0.0385869	-0.0196553	8.8845	8.99802	0.503499	-0.313557	0.625079	0.760521	0.966715	0.932114
100988_at	Bcl2l11	-0.00864329	0.129511	8.20637	7.78653	-0.0908747	1.44969	0.929314	0.178809	0.995898	0.609788
100989_at	Itgb1bp1	-0.00541082	-0.158789	7.89371	7.10311	-0.0613535	-2.50724	0.952238	0.0318069	0.99698	0.322407
100990_g_at	Itgb1bp1	0.163213	-0.0839359	6.93309	6.17946	1.12364	-0.730596	0.286366	0.482363	0.904212	0.806184
100991_at	Itgb1bp1	-0.104262	-0.0809588	8.5091	7.59505	-1.03289	-0.773977	0.325016	0.457461	0.913091	0.792748
100992_at	Phc1	0.0176391	-0.0493614	7.6919	5.97133	0.145385	-0.557984	0.887179	0.589547	0.99124	0.863291
100994_at	Aatk	0.01045	-0.0744268	7.88022	7.23359	0.12745	-0.847958	0.901009	0.416969	0.994545	0.772912
100995_at	Ciz1	-0.00813142	0.0567524	5.42097	4.38464	-0.101474	0.664773	0.921099	0.521742	0.995898	0.827904
100996_at	Agpat6	-0.00395825	0.255309	5.29698	5.17167	-0.038281	2.37579	0.970187	0.0397087	0.998611	0.354708
100997_at	Des	0.0274148	-0.0272222	7.50227	6.92179	0.36473	-0.458162	0.722601	0.656966	0.978648	0.896045
100998_at	H2-Ab1	0.155415	0.309291	9.09392	7.57751	0.832788	1.90496	0.423627	0.0869388	0.936928	0.46723
101000_at	Oaz2	0.144058	-0.199891	8.92157	6.8758	1.45492	-1.51341	0.175123	0.162172	0.850511	0.589124
101001_at	Wls	0.0392297	0.206229	9.10019	5.30295	0.207042	1.5919	0.839964	0.143551	0.984188	0.56056
101002_at	Azin1	0.0237125	0.111007	8.45358	7.57275	0.107256	0.522611	0.916622	0.613014	0.995898	0.873647
101003_at	Srsf3	-0.0347695	0.203984	6.23095	5.51503	-0.421626	2.12064	0.681858	0.0609007	0.975946	0.410773
101004_f_at	Srsf3	0.306248	1.08262	7.00283	6.12603	2.28547	7.13751	0.0443471	3.76874e-05	0.641798	0.00684095
101006_at	Acat2	0.0314108	0.0477128	5.87985	6.17457	0.225067	0.257648	0.826277	0.802082	0.983851	0.945857
101007_at	Mknk2	0.267606	0.60758	9.27707	9.05855	2.76972	7.39217	0.0190868	2.81798e-05	0.472573	0.00604873
101008_at	Tcerg1	0.239133	0.300383	5.0501	4.63368	3.05075	4.10216	0.0116864	0.00229619	0.375236	0.0893299
101009_at	Krt8	0.170494	0.230289	9.38739	9.51733	2.18942	2.7482	0.0523172	0.0211617	0.672157	0.278763
101010_at	Mybbp1a	-0.00415685	-0.0871515	6.48365	6.29702	-0.0438077	-1.2064	0.965885	0.256365	0.998172	0.678558
101011_at	Cct4	-0.0273463	0.129534	9.18713	8.71602	-0.161265	1.28923	0.874967	0.227321	0.988109	0.654616
101013_at	NA	0.199864	-0.09577	12.1464	12.0908	2.19714	-0.754429	0.0516285	0.468577	0.668766	0.798852
101014_at	Ifnar2	-0.378072	-0.120508	6.64889	6.25638	-3.55714	-1.36325	0.00487851	0.203718	0.255978	0.632366
101015_s_at	Ifnar2	0.0182731	-0.0662942	7.04002	7.57392	0.176603	-0.821271	0.863203	0.431286	0.986536	0.779858
101016_at	Arf1	0.309354	0.0249279	11.8052	11.3012	2.69501	0.149524	0.0217492	0.884214	0.497195	0.971724
101017_at	Cdk4	0.14735	-0.00624122	6.80998	4.9329	1.53098	-0.0645319	0.15553	0.949862	0.835416	0.98983
101019_at	Ctsc	0.132842	0.248065	5.90801	8.16391	0.898285	2.22582	0.389304	0.0510902	0.927209	0.38574
101020_at	Ctsc	-0.219332	0.0159111	5.74325	8.00595	-1.8837	0.126001	0.0877677	0.902314	0.755858	0.977059
101022_at	Srsf1	0.0150415	0.0318868	5.33796	4.89493	0.1987	0.444648	0.846318	0.666366	0.984752	0.89877
101023_f_at	Sdhaf1	0.286613	-0.240344	9.18192	7.83344	2.19445	-1.62739	0.0518677	0.135773	0.669136	0.549253
101024_i_at	NA	0.0132959	-0.313653	9.36002	7.66202	0.0405781	-3.74446	0.968399	0.00405311	0.998611	0.124057
101025_f_at	NA	-0.0347972	-0.0241615	8.13954	7.47143	-0.224172	-0.311194	0.826955	0.762262	0.983851	0.932114
101026_at	Pttg1	-0.0766159	0.00343944	4.24537	3.98786	-0.96971	0.0448952	0.354145	0.965105	0.918336	0.992171
101027_s_at	Pttg1	0.121114	0.181203	9.94509	9.45319	1.38161	2.1714	0.195972	0.0559591	0.863872	0.397733
101028_i_at	Actc1	-0.172148	-0.0499972	3.93656	4.02905	-1.57814	-0.733449	0.14436	0.480699	0.821309	0.805035
101029_f_at	Actc1	0.057274	0.138877	7.56491	7.06622	0.617905	1.33394	0.549894	0.212807	0.959877	0.640535
101030_at	Rhob	0.289808	0.777891	9.62578	8.62727	2.70286	5.94331	0.0214528	0.000163515	0.493691	0.0158292
101031_at	Surf1	0.142256	-0.0837245	8.70841	8.41641	1.52153	-0.846595	0.157854	0.417692	0.838357	0.77324
101033_at	Nudc	0.00202493	-0.0243734	7.46952	7.0675	0.0254736	-0.349556	0.980158	0.734169	0.999391	0.923546
101034_at	Grb2	0.0885646	0.275325	9.20656	8.77171	1.08127	3.21429	0.30395	0.00966997	0.908464	0.187867
101035_at	Api5	-0.0580636	0.332175	6.72902	6.6315	-0.396616	1.44297	0.699646	0.180647	0.978151	0.611556
101036_at	Tomm20	0.149328	-0.000113227	8.03285	6.74622	1.18016	-0.00124074	0.264157	0.999035	0.895338	0.999649
101037_at	Abi1	-0.0830276	-0.124759	7.23126	7.27601	-1.20311	-1.3837	0.255539	0.197573	0.892401	0.626376
101039_at	Col4a2	0.0641784	0.145911	9.50061	7.47305	0.385133	1.2543	0.707878	0.239221	0.978151	0.666833
101040_at	Capn2	0.201701	0.0727668	6.86873	6.08993	2.01061	0.914644	0.0709392	0.382633	0.729245	0.750483
101041_at	Krt14	0.0432857	-0.110897	5.8017	5.36387	0.623075	-1.69044	0.54662	0.122884	0.958511	0.53284
101042_f_at	Pepd	0.0813639	-0.0918369	8.66989	6.83717	0.755157	-0.695854	0.466868	0.502911	0.946209	0.818394
101043_f_at	NA	-0.133491	0.00600106	6.67475	6.25805	-1.91411	0.0638179	0.0834266	0.950416	0.752764	0.98983
101044_at	Alad	0.195566	-0.101757	9.0322	9.7976	2.33623	-1.27227	0.0406219	0.233038	0.62628	0.659455
101045_at	Hsd17b10	0.00427717	-0.0216208	9.63252	9.81023	0.0234191	-0.091521	0.981758	0.928948	0.999421	0.984787
101046_at	Vim	-0.151522	0.017095	6.09795	5.71682	-1.3955	0.192774	0.191868	0.851127	0.860758	0.963022
101047_at	Cd99	0.0713197	-0.0388081	9.57604	9.15344	0.372166	-0.320759	0.717221	0.755221	0.978573	0.930711
101048_at	Ptprc	-0.0361244	0.133729	3.90664	3.78244	-0.454145	0.934352	0.659031	0.372881	0.974465	0.744743
101049_at	Rpl12	-0.108166	0.0562507	7.92247	7.7539	-1.21805	0.896031	0.250049	0.392009	0.889115	0.757816
101050_at	Rfk	-0.113963	0.119718	8.83912	8.21414	-0.792961	1.56018	0.445467	0.150835	0.940698	0.571489
101051_at	S100a3	-0.0954556	-0.084088	7.42956	6.77635	-1.14847	-1.22117	0.276439	0.250976	0.899198	0.674745
101052_g_at	S100a3	-0.199554	0.0706325	3.69326	3.49025	-2.99018	1.03556	0.0129873	0.325628	0.401034	0.722898
101053_at	Prpf6	0.119692	0.26544	9.07603	8.48474	1.42034	2.20387	0.184709	0.0530028	0.857604	0.391468
101054_at	Cd74	-0.0476805	0.522351	11.3316	9.40001	-0.276323	1.4555	0.7877	0.177234	0.983753	0.608075
101055_at	Ctsa	0.0312893	0.275753	9.95762	9.3246	0.419786	2.20748	0.68316	0.0526835	0.975946	0.390755
101056_at	Rdx	-0.136758	-0.264499	8.75958	8.6679	-0.822001	-1.22465	0.42947	0.249722	0.938119	0.674589
101057_at	A430005L14Rik	0.128219	0.101983	8.48785	8.48476	1.67771	1.03267	0.12308	0.326912	0.799555	0.723124
101058_at	Amy1	-0.0157344	0.113547	4.32423	9.50975	-0.073851	0.389268	0.942526	0.705518	0.995898	0.91362
101059_at	Ndn	-0.0381617	0.0439313	5.99142	4.49795	-0.346148	0.683957	0.736114	0.51007	0.979115	0.822334
101060_at	Pdia3	-0.00815421	0.0748309	8.30229	7.92296	-0.030345	0.368216	0.976365	0.720649	0.999391	0.918683
101061_at	Ssr2	0.0692729	0.348578	7.88648	7.93839	0.624252	2.55422	0.545876	0.0293782	0.958511	0.315149
101062_at	Hmox2	0.263027	0.769561	7.04751	6.60099	3.60448	6.35187	0.00450077	9.69845e-05	0.247602	0.0114153
101063_at	Tnnc1	-0.242863	0.0737984	5.62133	4.8368	-2.24516	0.668439	0.0475382	0.519499	0.650227	0.826776
101064_at	Plrg1	-0.0197929	0.35206	7.61932	7.09921	-0.216697	2.62976	0.832625	0.0258546	0.983851	0.297304
101065_at	Pcna	0.0922003	0.0503096	9.00778	8.18074	0.644297	0.5779	0.533298	0.576548	0.955636	0.857135
101067_at	Mrpl24	0.0541911	-0.00908	8.85973	8.51746	0.495492	-0.0754095	0.630528	0.941427	0.9692	0.987651
101068_at	Mkrn1	0.0960145	0.114719	7.26726	6.56561	1.23874	1.1999	0.242599	0.258768	0.884916	0.680565
101069_g_at	Mkrn1	0.330386	0.606819	8.37775	7.79964	2.11238	4.30336	0.0596851	0.0016805	0.687107	0.0718921
101070_at	Mkrn1	0.066438	0.157257	7.43053	6.49801	0.963627	1.86197	0.357047	0.0932494	0.918559	0.479612
101071_at	Myh6	-0.0848449	0.111718	4.17849	3.64504	-1.21247	1.75835	0.252087	0.110248	0.889533	0.510381
101072_at	Eif4ebp2	-0.163429	-0.32108	10.464	10.3954	-1.49691	-2.14569	0.164058	0.0584116	0.840449	0.405262
101073_at	Lrp1	-0.0813244	-0.0430582	8.95602	10.1759	-0.9519	-0.567445	0.36269	0.583352	0.921372	0.85988
101074_at	Ddost	0.0852047	0.187042	7.29245	7.34399	0.605945	1.65755	0.55751	0.129464	0.962425	0.541595
101075_f_at	Agr2	0.0057469	-0.0201438	5.55271	5.63727	0.0587856	-0.220854	0.954234	0.829803	0.997612	0.95737
101076_r_at	Agr2	0.124017	0.0743889	5.96722	5.69524	1.49725	0.914065	0.16397	0.382923	0.840449	0.750493
101077_at	Slc4a1	-0.044756	-0.00365152	7.69038	6.7685	-0.239334	-0.0406678	0.815485	0.968389	0.983851	0.99226
101078_at	Bsg	0.19532	-0.0336024	11.2363	10.5697	2.11601	-0.216485	0.0593172	0.833111	0.687107	0.958089
101079_at	Nxf1	0.00892872	0.196903	6.45185	5.5801	0.0857001	1.609	0.933328	0.139757	0.995898	0.557329
101080_at	Col5a1	-0.0922266	-0.120395	6.6717	6.01686	-1.08751	-1.5028	0.301308	0.164844	0.908464	0.591714
101081_at	Ctbp1	0.153169	-0.0387272	9.49567	8.16235	1.60113	-0.441493	0.139178	0.668571	0.814796	0.899676
101082_at	Me1	-0.23419	-0.550716	9.14882	9.33944	-1.44124	-1.93111	0.178864	0.0832965	0.855057	0.459691
101083_s_at	Lsm2	-0.0252587	-0.159591	7.67081	7.34823	-0.215951	-1.69427	0.833192	0.122137	0.983914	0.532504
101084_f_at	Dpm3	0.126126	-0.437799	9.77983	9.24268	1.00986	-3.68761	0.335419	0.00444272	0.913091	0.130543
101085_at	Mrps24	0.0599204	-0.191827	9.55209	9.08037	0.371621	-1.70586	0.717615	0.119905	0.978573	0.529263
101086_f_at	Cnbp	0.557609	0.547147	9.54432	9.63107	3.92716	3.77917	0.00261523	0.00383296	0.182452	0.119367
101087_r_at	Cnbp	0.129147	0.0984222	7.13708	6.69626	1.3507	1.0942	0.205371	0.300392	0.867292	0.707536
101088_f_at	Cnbp	0.493937	0.609965	9.20962	9.26368	3.07185	7.27504	0.0112649	3.21824e-05	0.368145	0.00631687
101089_at	Pdlim3	0.0326917	-0.0153175	4.64349	4.00056	0.238938	-0.168835	0.815784	0.869408	0.983851	0.968054
101090_at	Fbn1	0.0617869	0.0697829	5.85307	4.1903	0.626828	0.951015	0.54425	0.364775	0.958511	0.742752
101091_at	Sumo1	-0.0114642	-0.0259625	9.5091	8.21579	-0.0925141	-0.228089	0.928043	0.824331	0.995898	0.954939
101093_at	Col4a1	-0.0349525	0.347944	10.1682	8.71034	-0.260776	2.61142	0.799343	0.0266696	0.983753	0.300647
101094_at	Higd1a	0.116268	0.291762	6.58175	6.54338	1.28919	2.65651	0.225195	0.0247108	0.879754	0.292
101095_at	Mfap2	-0.0642189	-0.077244	6.55428	5.90528	-0.705303	-0.946591	0.496074	0.366915	0.954047	0.743235
101096_s_at	Hax1	-0.0509565	0.181271	8.30927	7.96119	-0.384094	1.72657	0.708625	0.116005	0.978151	0.521106
101097_at	Mrpl21	0.0929562	-0.145081	8.13372	7.19862	1.296	-1.20167	0.222926	0.258112	0.876819	0.679829
101099_at	Nsg1	0.0139668	0.0136637	4.39387	3.80528	0.197452	0.176273	0.847269	0.863718	0.984801	0.966602
101101_at	Ppp2cb	0.115882	0.298609	7.97172	7.23363	0.727726	2.53726	0.482801	0.0302329	0.95112	0.316108
101102_at	Igbp1	-0.0300263	0.274401	8.00339	7.42154	-0.286315	2.54048	0.780245	0.0300688	0.983753	0.315545
101103_at	Cyp4a14	0.187864	1.90173	9.26227	10.3104	1.04166	18.4173	0.321117	7.54341e-09	0.913091	9.42021e-05
101104_at	Dscr3	-0.326952	-0.379345	8.41047	8.18152	-2.8755	-5.70887	0.0158653	0.0002229	0.44126	0.0193475
101105_at	Banf1	0.197061	0.0536232	9.66495	9.12314	1.41196	0.469399	0.187098	0.649196	0.859538	0.892073
101106_at	G3bp2	-0.246086	0.189666	7.26255	7.00976	-1.28026	1.35392	0.2282	0.206574	0.879754	0.635626
101107_at	Calu	0.0458105	0.179669	8.03283	8.1173	0.431035	1.01503	0.675217	0.334828	0.975344	0.727063
101108_at	Nasp	-0.0831311	0.0603271	4.77736	4.43871	-1.17083	0.990966	0.267727	0.345866	0.895745	0.733025
101109_at	Dag1	-0.0900357	0.0928488	10.0319	9.32261	-0.805874	1.01765	0.438306	0.333647	0.940698	0.726378
101110_at	Col6a3	0.00275083	0.00817322	8.29345	6.8028	0.0266148	0.0977974	0.979269	0.924092	0.999391	0.983773
101111_at	Rhoa	3.79256e-05	-0.126834	8.28588	8.07548	0.000513365	-1.77193	0.9996	0.107869	0.999683	0.507136
101112_g_at	Rhoa	0.107199	0.0805213	8.71387	7.96265	1.07248	0.638745	0.307698	0.537832	0.909045	0.83486
101113_at	Rhoa	-0.0259872	0.111937	10.0345	9.13618	-0.214669	1.00143	0.834165	0.341036	0.984184	0.73125
101114_at	Srprb	-0.0437065	-0.168593	5.97461	5.31461	-0.370354	-1.63766	0.71853	0.133595	0.978573	0.547976
101115_at	Ltf	0.00066081	-0.115687	6.83564	6.56929	0.00770875	-1.89116	0.993995	0.0889191	0.999683	0.471116
101116_at	NA	0.00580938	-0.0343595	3.85287	3.59344	0.0721679	-0.516121	0.943834	0.617372	0.995898	0.876226
101117_at	AA511261	0.00422519	-0.169636	5.57622	4.83744	0.0476805	-1.935	0.962872	0.0827672	0.998172	0.458765
101118_at	NA	-0.0815605	0.0859156	4.07969	3.93498	-0.966629	0.934011	0.355613	0.373048	0.918559	0.744784
101119_at	AA517650	-0.101384	-0.138985	4.31454	4.1827	-1.17664	-1.78813	0.265502	0.105092	0.895745	0.49983
101120_at	NA	-0.103105	-0.0984364	6.43046	5.9413	-1.17208	-0.951695	0.267245	0.364448	0.895745	0.742752
101121_at	NA	-0.16696	-0.067399	5.84997	4.98508	-1.47722	-0.773443	0.169168	0.457762	0.844015	0.792952
101122_at	Epha6	-0.0889904	-0.0630558	6.5554	5.69013	-0.905629	-0.68009	0.385579	0.51241	0.925848	0.82399
101123_at	Itm2b	0.0778006	-0.137053	11.6327	11.1564	0.70247	-1.03131	0.497767	0.327516	0.954047	0.723244
101124_at	NA	-0.0757965	-0.0564916	5.48115	5.03019	-0.679639	-0.524004	0.511538	0.612081	0.954047	0.873647
101125_at	Hyou1	0.0118211	-0.123495	4.44471	4.19565	0.0991577	-1.21556	0.922893	0.253012	0.995898	0.675578
101126_r_at	NA	-0.0407169	-0.0596871	3.76117	3.37255	-0.54044	-0.956735	0.600245	0.362023	0.965979	0.741705
101127_at	Vsx2	-0.00527747	0.0929679	6.72482	6.25411	-0.057992	1.38314	0.954851	0.197739	0.99784	0.62658
101128_at	Cacna1s	-0.0271618	-0.175352	6.39859	5.84185	-0.308908	-2.10117	0.763475	0.0629059	0.981527	0.416747
101129_at	NA	0.258932	0.140248	12.1606	11.6331	2.27538	1.39277	0.0451258	0.1949	0.644036	0.621693
101130_at	Col1a2	0.0236174	0.0486935	8.12681	7.32949	0.231669	0.540039	0.821278	0.601393	0.983851	0.86983
101131_at	Chrna7	-0.0908853	-0.0079704	8.26789	7.75707	-1.30559	-0.104695	0.21976	0.918759	0.876329	0.98123
101132_at	Scn7a	-0.0344879	-0.116854	4.92051	4.35304	-0.333293	-1.68027	0.745518	0.124886	0.979204	0.535391
101133_at	Lcn3	-0.177998	-0.106251	5.65822	5.27976	-1.71045	-1.15671	0.116722	0.275184	0.793198	0.690439
101134_at	Gcap8	-0.0170337	-0.0689399	4.44062	4.01867	-0.253094	-0.826676	0.805115	0.42836	0.983753	0.778645
101135_at	Calcr	-0.252674	0.0883393	4.38963	4.02437	-2.10826	1.12545	0.0601053	0.287574	0.687107	0.698703
101136_at	Tnfsf8	-0.0806093	-0.138299	5.97575	5.22448	-0.903693	-2.23054	0.386559	0.0506877	0.925848	0.384825
101137_at	Rps3	0.158423	0.34737	11.8798	11.2293	0.982062	1.54321	0.348305	0.154865	0.916955	0.576432
101138_at	Gabrb2	-0.112244	-0.238449	6.92363	6.43404	-1.1686	-2.81644	0.268587	0.0188574	0.896027	0.261366
101139_r_at	Prol1	-0.0804926	-0.228964	6.07189	5.09471	-0.460504	-2.36299	0.654609	0.0405743	0.972514	0.356113
101140_at	Htr1a	-0.00102114	-0.139573	6.59727	6.37934	-0.0111373	-1.78465	0.991324	0.105683	0.999683	0.500859
101141_at	NA	-0.0270968	-0.0177772	6.14291	5.60485	-0.35825	-0.243684	0.727302	0.81257	0.979115	0.949418
101142_at	Fzd6	0.0531754	-0.0468614	6.21754	5.88022	0.631986	-0.516402	0.541003	0.617183	0.9583	0.876138
101143_at	Fzd7	-0.030789	0.00714591	7.54566	7.24133	-0.310171	0.102469	0.762542	0.920479	0.981527	0.982054
101144_at	Il18r1	-0.152191	-0.101817	4.46911	3.90938	-1.72577	-1.12927	0.113849	0.286035	0.788191	0.697531
101145_at	Cep250	-0.0432531	-0.0436533	7.39694	6.80006	-0.479435	-0.681266	0.641526	0.511697	0.971594	0.823464
101146_at	Gsx1	-0.152487	-0.013597	7.85193	7.05773	-1.46799	-0.145745	0.171611	0.887117	0.845501	0.971868
101147_at	Gcsam	0.062142	-0.0487748	4.62959	4.14764	0.752422	-0.481086	0.468442	0.641162	0.947058	0.88771
101148_at	Prkci	-0.00517051	-0.0489844	5.01972	4.80562	-0.0584303	-0.722571	0.95451	0.487061	0.997678	0.808295
101149_at	Shc3	-0.0538791	0.0713161	5.12467	4.87216	-0.622165	0.961808	0.547196	0.359594	0.958799	0.740891
101150_at	Etv2	0.0206973	-0.0333713	7.37112	7.34112	0.264658	-0.548951	0.79643	0.595494	0.983753	0.867133
101151_at	Rcvrn	-0.0218152	0.047225	5.98904	5.80123	-0.254003	0.525894	0.804432	0.610817	0.983753	0.873067
101152_at	Htr5a	0.0104077	-0.0232898	8.52952	7.80666	0.135452	-0.380379	0.894834	0.711891	0.993879	0.915458
101153_at	Ofa	-0.00990763	0.0280392	3.5648	3.25891	-0.150146	0.481364	0.883514	0.640972	0.990105	0.887707
101154_at	AA517023	-0.0148884	0.0384494	3.56014	3.24353	-0.196835	0.55626	0.84774	0.59068	0.985073	0.864052
101155_at	Hsf2	-0.054192	-0.0403685	5.65095	5.12442	-0.812144	-0.416437	0.434857	0.686188	0.940487	0.907842
101156_at	Npn2	0.196964	0.14044	4.96195	4.55546	1.6814	1.6363	0.122348	0.133881	0.799555	0.547976
101157_at	Ighd	-0.0261074	-0.0758364	7.61831	7.36492	-0.321276	-1.01796	0.754348	0.333507	0.979894	0.726378
101158_at	Zfp2	-0.173241	-0.117256	5.32366	5.29974	-1.90725	-1.15713	0.0843882	0.275022	0.752764	0.690439
101159_at	Mitf	-0.151412	-0.0729126	6.03276	5.16974	-2.0675	-0.85679	0.0644216	0.412303	0.706735	0.77059
101160_at	Cxcl2	-0.0797775	0.0880814	5.2706	4.75473	-0.731415	1.13416	0.480639	0.284079	0.950771	0.696099
101161_at	Mc1r	0.0047261	-0.03503	7.46038	7.25313	0.0657227	-0.293202	0.948842	0.775567	0.99646	0.935924
101162_at	Myf5	0.0459296	-0.0352499	3.5946	3.34681	0.625785	-0.406046	0.544908	0.693553	0.958511	0.909384
101163_at	Rag2	-0.131818	-0.168353	5.43016	5.01371	-1.65706	-2.01745	0.12725	0.0722674	0.807195	0.433674
101164_at	Tnfsf4	-0.0623489	-0.0601043	4.1285	3.67531	-0.642167	-0.87981	0.534627	0.400312	0.955881	0.763092
101165_at	NA	-0.121251	-0.0561893	9.94171	9.33014	-1.5449	-0.799965	0.152156	0.442952	0.830064	0.786583
101166_at	Zscan2	0.0165646	-0.108697	6.45131	6.09117	0.218951	-1.14947	0.830914	0.278014	0.983851	0.693175
101167_at	NA	-0.0269719	-0.0329071	5.01734	4.90785	-0.377042	-0.409098	0.713702	0.691387	0.978151	0.909239
101168_at	NA	-0.0922416	-0.0967109	5.08761	4.15084	-1.24682	-1.06217	0.23974	0.313981	0.880551	0.716949
101169_at	Prph2	-0.0532294	-0.114377	7.66626	6.99923	-0.72163	-1.45539	0.486387	0.177263	0.95112	0.608075
101170_at	Htr1f	-0.00685072	-0.0632796	4.39756	4.0219	-0.0921049	-0.790315	0.92836	0.448303	0.995898	0.7883
101171_at	Dvl3	0.0326573	0.0668395	6.56162	6.06915	0.474089	1.02423	0.645208	0.330682	0.971884	0.725388
101172_at	Zfp92	-0.0810435	-0.197168	7.08854	6.8876	-1.17708	-2.32992	0.26533	0.042897	0.895745	0.364632
101173_at	Pctp	-0.0174859	0.696292	4.95036	7.01298	-0.217546	2.04761	0.831981	0.068752	0.983851	0.427846
101174_at	Ocm	-0.159234	-0.141949	7.01778	7.02405	-1.40774	-1.49591	0.188312	0.166601	0.859585	0.593642
101175_at	Map3k2	-0.0684558	0.0202487	4.49984	4.29919	-0.88097	0.211817	0.398184	0.83665	0.930056	0.958892
101176_at	Lcn4	-0.0454542	-0.0482405	5.58334	5.11242	-0.474426	-0.570335	0.644975	0.581467	0.971884	0.859095
101177_at	Acvr1b	0.0198657	0.0186244	7.38084	7.35901	0.189505	0.292835	0.853335	0.775839	0.985795	0.935924
101178_at	Sema3c	-0.0228033	-0.0280316	4.9076	4.45953	-0.198159	-0.335506	0.84673	0.744413	0.984752	0.927767
101179_at	NA	-0.0738236	0.097034	10.3699	10.2653	-0.738425	0.814661	0.476547	0.434883	0.949922	0.781286
101180_at	Atm	-0.3302	0.150924	6.84265	5.80928	-2.64448	1.5201	0.0237565	0.160505	0.516849	0.585908
101181_at	Cnga2	0.0484859	0.00219091	5.47124	4.91385	0.697921	0.0269397	0.500493	0.979056	0.954047	0.994954
101182_at	Gli3	-0.00988828	0.00415456	5.34195	4.93414	-0.105842	0.0470109	0.917716	0.963462	0.995898	0.991815
101183_at	Syt2	-0.075716	-0.0715023	5.78527	5.50438	-0.767195	-0.956059	0.459983	0.362347	0.943606	0.741705
101184_at	Hsd17b3	-0.0587849	-0.155975	5.40731	4.51572	-0.539293	-1.79856	0.601009	0.103339	0.965979	0.495857
101185_at	Foxl1	-0.0426811	0.0224206	7.93152	7.53199	-0.578817	0.312541	0.575001	0.761269	0.965979	0.932114
101186_at	Ppnr	-0.0578281	0.00179795	5.07477	4.69529	-0.792796	0.0210986	0.445559	0.983596	0.940698	0.996039
101187_at	Serpina5	-0.0861209	-0.104752	6.45437	6.06199	-0.854005	-1.2898	0.412291	0.227131	0.932663	0.65432
101188_at	Kcnj3	-0.247735	0.103179	4.3675	4.00138	-2.36319	1.3731	0.038769	0.200739	0.617677	0.629318
101189_at	Hrk	-0.0897248	-0.0518903	5.76235	5.56728	-0.828817	-0.670959	0.425772	0.517961	0.936928	0.826303
101190_at	Mtnr1a	-0.0488293	-0.126575	4.71544	4.36538	-0.642346	-1.50767	0.534515	0.163612	0.955881	0.589824
101191_at	Doc2b	-0.0857386	-0.0131024	6.36798	6.00361	-0.924779	-0.187234	0.375985	0.85535	0.923448	0.964741
101192_at	Lhx5	-0.148816	-0.144439	6.07817	5.70956	-1.76097	-1.41944	0.10749	0.187213	0.777256	0.614731
101193_at	Zik1	-0.0394118	-0.106714	4.92409	4.42201	-0.354393	-1.28278	0.730106	0.229482	0.979115	0.656577
101194_at	Stra8	0.0227525	-0.0653703	4.55932	4.97542	0.273132	-0.645067	0.790085	0.533898	0.983753	0.833738
101195_at	Myl10	-0.0829185	0.0321967	6.11896	5.74501	-0.950535	0.554041	0.363351	0.592139	0.922068	0.86497
101196_at	Pcsk6	0.0418118	-0.127199	7.34436	7.65289	0.462084	-1.02258	0.653512	0.331424	0.971884	0.725855
101197_at	Glrp1	-0.0382436	-0.14374	6.23034	6.20172	-0.440388	-2.14296	0.668645	0.0586779	0.974487	0.405563
101198_at	Cplx1	0.00299941	-0.10047	9.39611	8.97843	0.0312313	-1.28828	0.975675	0.227638	0.999391	0.654616
101199_at	Cmklr1	-0.0354095	-0.00125237	6.20682	6.35911	-0.485665	-0.0185921	0.637248	0.985545	0.970548	0.996417
101200_at	Cyp19a1	-0.00665189	-0.0888818	4.70285	4.70915	-0.0953208	-1.29248	0.925867	0.226239	0.995898	0.653393
101201_r_at	NA	0.103739	0.0920111	3.66471	3.44843	1.30528	0.898905	0.219863	0.390551	0.876329	0.756768
101202_at	NA	-0.238219	0.0230135	5.52814	5.09418	-1.2675	0.297619	0.232549	0.772294	0.879754	0.935356
101203_r_at	Srrm2	-0.152764	-0.17426	3.64347	3.33088	-1.47865	-1.95407	0.168794	0.080218	0.843498	0.456384
101204_at	NA	-0.11772	-0.0416654	8.22764	7.99237	-1.2722	-0.575569	0.23094	0.578062	0.879754	0.857955
101205_at	NA	0.00476495	-0.0649194	4.0704	3.46438	0.0369319	-0.984241	0.971237	0.348997	0.998611	0.735325
101206_at	NA	-0.0879773	-0.0807796	5.13871	4.53197	-0.873391	-0.806857	0.402115	0.439155	0.930056	0.782893
101207_at	NA	0.187579	0.0223345	12.62	12.174	2.34229	0.263693	0.0401987	0.797554	0.622831	0.943939
101208_at	Slc7a1	-0.220625	-0.224638	5.86828	5.75464	-1.9085	-1.6327	0.0842134	0.134644	0.752764	0.547976
101209_at	Fcer1a	-0.0249174	-0.0403626	3.9345	3.7783	-0.337295	-0.622561	0.742586	0.547981	0.979115	0.84015
101210_at	Zfp651	-0.0258672	0.0743819	8.17622	7.57443	-0.350009	1.08049	0.733298	0.306152	0.979115	0.711001
101211_at	D7Bwg0826e	0.080648	0.077083	3.81384	3.68159	0.746385	0.921322	0.471927	0.379309	0.948105	0.748394
101212_at	Rps7	0.202379	0.35091	11.7891	11.2079	1.39308	1.50409	0.192579	0.164517	0.86094	0.591218
101213_at	Rplp0	0.174393	0.0198405	12.6381	11.9618	1.76044	0.174513	0.107583	0.865064	0.777256	0.966691
101214_f_at	NA	-0.0171828	-0.218929	11.7921	11.5216	-0.162231	-1.92789	0.874225	0.0837373	0.988109	0.460511
101215_at	Gabra2	-0.18304	-0.175058	5.17254	4.66283	-1.89563	-2.30518	0.0860414	0.0447197	0.752764	0.366585
101216_at	NA	-0.229174	0.00868012	7.05429	6.1513	-3.0905	0.145985	0.0109052	0.886933	0.363157	0.971864
101217_at	NA	-0.157906	-0.163988	6.44065	5.86139	-1.04992	-1.42539	0.317478	0.185534	0.913033	0.613203
101218_at	D7Ertd1e	-0.00518103	-0.097975	7.26197	7.68537	-0.0613091	-0.835871	0.952272	0.423413	0.99698	0.775901
101219_at	NA	-0.0504435	-0.0602909	8.00267	7.59252	-0.617799	-0.795303	0.549961	0.445532	0.959877	0.787074
101220_at	C76628	-0.0369639	0.0137614	5.33335	5.11421	-0.540107	0.122901	0.600467	0.904704	0.965979	0.97802
101221_at	Rab3il1	-0.247464	-0.102256	6.10244	5.03003	-2.16999	-1.10578	0.0540887	0.295588	0.676663	0.705201
101222_f_at	Ttc39b	-0.112825	-0.0862301	9.57721	9.12003	-1.3797	-1.20037	0.196545	0.258593	0.863872	0.680428
101223_r_at	NA	-0.0784356	0.0227763	3.36673	3.28551	-0.836638	0.309685	0.421554	0.763375	0.936581	0.932114
101224_at	D8Ertd107e	0.079006	0.0594793	5.3499	5.03979	0.939612	0.956147	0.368672	0.362305	0.922568	0.741705
101225_at	D5Ertd102e	-0.00931594	-0.225377	7.58158	7.54942	-0.117666	-2.44357	0.908568	0.0354182	0.995397	0.33845
101226_at	NA	0.0347391	-0.015515	7.48721	6.74286	0.444075	-0.216597	0.666062	0.833026	0.974487	0.958089
101227_at	NA	-0.00857974	0.0976131	4.98915	5.42117	-0.119601	1.10743	0.907072	0.294912	0.995082	0.704719
101228_at	Bub3	-0.13291	-0.0207976	5.6799	5.28529	-1.28138	-0.197089	0.227821	0.847841	0.879754	0.962586
101229_at	C78228	-0.0517741	-0.0226856	6.18067	5.82694	-0.541782	-0.268409	0.599353	0.794027	0.965979	0.941808
101230_at	Eif4enif1	-0.0988976	-0.0263162	5.0368	4.62198	-1.41953	-0.389847	0.18494	0.705103	0.857604	0.913554
101231_at	NA	-0.215208	-0.0654887	4.95249	4.85477	-2.28809	-0.757162	0.0441466	0.467012	0.641798	0.798312
101232_at	C78532	0.00657995	-0.0265476	3.72346	3.5463	0.0843319	-0.427901	0.93439	0.678102	0.995898	0.903654
101233_at	NA	-0.0419056	0.0788054	5.45743	4.9511	-0.469333	1.33158	0.648491	0.213553	0.971884	0.640847
101234_at	C78704	-0.138405	-0.016627	5.33408	4.96432	-1.70049	-0.1498	0.118624	0.884003	0.796734	0.971724
101235_f_at	NA	-0.14103	-0.000313478	6.31281	5.74032	-1.73846	-0.0035783	0.111518	0.997218	0.784143	0.999263
101254_at	Ran	0.312758	0.0973996	11.1229	10.6461	2.3794	0.593474	0.0376954	0.566494	0.608978	0.851366
101255_at	Ubb	0.105408	0.231331	13.4496	12.7733	1.39399	2.10657	0.192313	0.062344	0.86094	0.415039
101276_at	Ighm	-0.0719041	0.038944	4.06305	3.68032	-0.872997	0.535929	0.40232	0.604123	0.930056	0.870408
101277_at	Vwa7	-0.00851986	-0.0720375	7.91834	8.15087	-0.108806	-1.04009	0.915422	0.323623	0.995898	0.722526
101278_at	Artn	0.00781133	-0.0798724	8.20679	7.7044	0.122348	-1.299	0.904949	0.224082	0.994689	0.651231
101279_f_at	Trbv13-2	-0.0145401	-0.0467049	5.99171	5.34724	-0.184274	-0.668603	0.857333	0.519399	0.985848	0.826776
101280_at	Olfr2	-0.114417	-0.0354249	7.96169	7.65338	-1.17012	-0.50057	0.268002	0.627876	0.895745	0.881721
101281_at	Olfr49	-0.120064	-0.259261	6.23181	5.81599	-1.16724	-2.83208	0.26911	0.018366	0.896157	0.258866
101282_at	Ptgdr2	0.00664085	-0.0635359	8.40003	8.07595	0.0671123	-1.06344	0.947762	0.313432	0.996235	0.716197
101286_at	Gja8	0.032743	-0.128138	6.68983	6.2631	0.471272	-1.8743	0.647152	0.0913972	0.971884	0.474935
101287_s_at	Cyp2d10	0.330865	0.0352718	6.99604	12.6338	1.34519	0.221482	0.207086	0.829327	0.867292	0.957175
101288_at	NA	-0.00125341	-0.117652	5.88029	5.92509	-0.0129072	-1.44089	0.989945	0.181221	0.999683	0.611709
101289_f_at	Klk1b22	-0.0324918	-0.0177748	11.4247	6.21901	-0.408252	-0.23299	0.691346	0.82063	0.976569	0.953039
101290_at	Gnrh1	-0.0796787	0.0750447	7.52741	7.14112	-1.16426	0.87619	0.270265	0.402181	0.896754	0.764025
101291_at	NA	0.0186923	0.0119278	5.87724	5.46601	0.263814	0.181105	0.797064	0.860027	0.983753	0.965919
101292_f_at	NA	-0.0444553	-0.00206466	10.1515	9.86563	-0.559426	-0.0300055	0.587684	0.976673	0.965979	0.994441
101293_at	G6pd2	0.00493326	-0.0361245	4.1504	3.97107	0.0625983	-0.541165	0.95127	0.600646	0.99698	0.869766
101294_g_at	NA	0.0304273	-0.187251	7.2891	7.11256	0.253004	-0.61715	0.805183	0.551398	0.983753	0.842294
101295_s_at	Clns1a	0.096915	0.0196094	6.68048	6.41971	1.00528	0.234109	0.337518	0.819785	0.913588	0.952911
101296_at	NA	-0.0295905	-0.0262202	3.84427	3.46325	-0.294062	-0.452685	0.774481	0.660768	0.983753	0.897409
101297_at	Ptprc	0.0333505	0.0598192	3.70641	3.70827	0.529458	0.654047	0.607575	0.528338	0.965979	0.831701
101298_g_at	Ptprc	-0.0602491	0.117072	5.13854	4.78357	-0.5426	1.49807	0.598809	0.166049	0.965979	0.592548
101299_at	H2-M1	-0.07079	-0.151248	6.90943	5.84654	-0.569873	-1.23983	0.580833	0.244301	0.965979	0.670621
101300_at	H2-M2	-0.128686	-0.0403905	7.23955	7.12957	-1.56555	-0.36381	0.147272	0.723833	0.823024	0.91965
101301_at	NA	-0.0244875	-0.185977	7.3546	7.13036	-0.21715	-2.65373	0.832281	0.0248276	0.983851	0.292
101302_at	Kcnd1	-0.11721	-0.0349737	7.39129	7.10365	-1.55334	-0.395009	0.150142	0.701414	0.827959	0.912973
101303_at	Olfr15	-0.038846	-0.0611174	6.78396	6.35837	-0.42416	-0.819163	0.680066	0.432431	0.975502	0.78015
101305_at	Pou3f3	-0.531964	-0.0208736	7.02269	5.96386	-3.12041	-0.217739	0.0103526	0.832161	0.358124	0.958017
101306_f_at	NA	-0.188425	0.163291	5.84623	5.14768	-1.9192	1.11531	0.0827206	0.291683	0.752764	0.7022
101307_at	Cyp4a12b	-8.85748e-05	0.248278	8.89223	8.80326	-0.000846374	2.94192	0.999341	0.0152613	0.999683	0.237931
101308_at	Kcnb1	0.0334247	-0.0587234	6.16061	5.87675	0.463343	-0.894622	0.652639	0.392726	0.971884	0.758062
101309_at	Sstr3	-0.0673091	-0.0307667	8.25626	7.92692	-0.925123	-0.420949	0.375815	0.683001	0.923398	0.905674
101310_at	Tal2	-0.101299	0.0495128	5.18489	4.59596	-1.10973	0.36837	0.29205	0.720538	0.905915	0.918683
101311_at	Tcrb-J	-0.00196523	-0.123038	6.90006	6.55372	-0.0312982	-1.94737	0.975623	0.0811059	0.999391	0.45822
101312_at	Grin2b	-0.06718	-0.0255943	6.68459	5.90977	-0.521912	-0.262733	0.612637	0.798272	0.965979	0.944107
101313_r_at	NA	0.0123844	-0.195017	4.84427	4.16753	0.134043	-2.36733	0.89592	0.0402784	0.993879	0.355726
101314_at	NA	-0.0211088	-0.0389653	7.18183	6.71658	-0.28038	-0.651367	0.78467	0.529994	0.983753	0.832251
101315_at	Tuba-rs1	-0.0874509	-0.0749161	6.09013	5.40944	-1.0343	-0.856402	0.324385	0.412507	0.913091	0.77059
101316_at	Wnt7a	-0.0573318	0.069774	6.28192	5.62719	-0.709091	0.841424	0.493816	0.420444	0.954047	0.774183
101317_f_at	Ifnab	-0.108156	-0.0796193	7.34843	7.19226	-1.2169	-1.05989	0.250466	0.314965	0.889115	0.717753
101318_at	Sstr1	-0.0161019	-0.00473357	7.08613	6.59357	-0.188116	-0.0614488	0.854396	0.952254	0.985795	0.98983
101319_f_at	Adck1	-0.0180039	0.000141617	6.32509	6.16651	-0.176578	0.00129346	0.863222	0.998994	0.986536	0.999649
101320_f_at	Igh-VJ558	-0.0642901	-0.061219	5.69839	5.018	-0.660389	-0.73437	0.523324	0.480162	0.954047	0.804735
101321_r_at	Igh-VJ558	0.175271	0.0394602	3.6802	3.20079	1.8012	0.646127	0.100619	0.53324	0.77212	0.833611
101324_r_at	NA	0.00465236	0.00584168	4.30275	3.81226	0.050254	0.0460472	0.96087	0.96421	0.998172	0.991932
101325_r_at	Fbrs	-0.00258725	-0.0206104	6.61633	6.12257	-0.0372445	-0.201618	0.970993	0.844396	0.998611	0.961153
101326_at	NA	-0.0962509	-0.132327	6.99338	6.68707	-0.935381	-1.88684	0.370747	0.0895484	0.922841	0.471525
101327_at	Lcp1	0.0343079	0.0486107	7.18614	7.12996	0.45588	0.432766	0.657823	0.674683	0.973675	0.90245
101328_at	Pla2g5	0.0896736	-0.208267	7.07591	6.45992	0.670527	-2.00371	0.517097	0.0739244	0.954047	0.439837
101329_f_at	Igkv15-103	0.0408977	-0.132857	5.91517	5.63961	0.395341	-1.21909	0.700558	0.251731	0.978151	0.674938
101330_f_at	Igkv15-103	-0.215437	0.0409488	5.61419	5.31618	-2.22563	0.447569	0.0491623	0.66433	0.660542	0.89876
101331_f_at	NA	-0.0126234	-0.0380771	5.55863	4.76216	-0.121593	-0.499752	0.905532	0.628431	0.994689	0.881781
101332_at	Igk	-0.0521665	-0.135379	4.83184	4.21926	-0.738013	-2.18739	0.476787	0.0544836	0.949922	0.394223
101333_at	Galnt4	-0.00542248	-0.0892071	5.65358	5.10923	-0.0812063	-1.06549	0.936815	0.312552	0.995898	0.71578
101334_at	Nkx2-3	0.0223639	0.049057	6.56112	6.06564	0.275009	0.480548	0.788681	0.641531	0.983753	0.887737
101335_at	Cdk5r2	-0.141933	0.0119608	6.83295	6.51156	-1.77916	0.18879	0.104332	0.854163	0.774029	0.964132
101336_at	NA	-0.098204	-0.0776546	7.04033	6.31102	-0.988725	-0.971158	0.345184	0.355149	0.916577	0.737526
101337_at	Moxd2	0.0547732	-0.0945293	4.70976	4.24529	0.703436	-1.04593	0.497189	0.32105	0.954047	0.720952
101338_f_at	NA	0.0129706	-0.182638	8.50275	8.20902	0.15132	-2.60854	0.882611	0.0267994	0.989942	0.300647
101339_at	NA	-0.123527	0.00668217	8.01383	7.36287	-1.4114	0.0853184	0.187261	0.93375	0.859538	0.985513
101340_at	NA	-0.0376385	-0.077529	6.86866	6.53763	-0.38286	-1.05024	0.709512	0.319161	0.978151	0.719827
101341_at	H2-M9	-0.0301475	-0.00743396	8.31104	7.86749	-0.322341	-0.119735	0.753564	0.907146	0.979894	0.978621
101342_at	Notch2	-0.0585914	-0.155141	8.89458	8.47143	-0.816302	-2.30649	0.432579	0.0446213	0.940487	0.366249
101343_at	Sh2d1b1	-0.117629	-0.0834801	5.4748	4.71923	-1.22195	-1.23457	0.248631	0.246168	0.889115	0.671616
101344_at	Cckbr	-0.0169615	-0.0261378	8.58744	8.24488	-0.232732	-0.367869	0.820474	0.7209	0.983851	0.918683
101345_at	Egfl8	-0.00282241	-0.0411683	8.18446	7.89372	-0.028407	-0.622048	0.977874	0.548304	0.999391	0.84015
101346_at	Ighm	0.137563	0.0551345	5.744	5.44446	1.35698	0.843998	0.203431	0.419073	0.86616	0.773797
101347_at	Igkv9-120	-0.0812282	-0.0311807	6.05951	5.76343	-0.990164	-0.536449	0.344513	0.603777	0.916577	0.870408
101348_at	Igkv1-135	-0.13458	-0.142955	7.28434	6.74824	-1.814	-1.97166	0.0985169	0.0779326	0.770527	0.452231
101349_at	NA	-0.0165095	-0.0167929	4.43155	3.97166	-0.183765	-0.174427	0.857722	0.86513	0.985848	0.966691
101350_g_at	Plk1	0.0340638	0.0435773	7.69689	7.04903	0.351875	0.428138	0.731939	0.677935	0.979115	0.903528
101351_at	Vmn2r61	-0.0288901	-0.0663276	3.91268	3.89409	-0.402016	-0.895649	0.695789	0.392204	0.977831	0.757816
101352_g_at	NA	-0.0320977	-0.0729964	6.51235	6.3118	-0.319259	-0.92118	0.755834	0.379379	0.979894	0.748394
101353_at	Vmn2r60	-0.056806	-0.0309926	3.84465	3.33045	-0.75068	-0.444449	0.469446	0.666506	0.947609	0.89877
101354_at	Slc18a3	0.0165299	-0.0952769	7.06621	6.62628	0.208189	-1.26131	0.839092	0.236794	0.984184	0.663916
101355_at	Ascl2	-0.0179492	-0.00928965	7.91171	7.788	-0.218119	-0.108525	0.831546	0.915799	0.983851	0.98067
101356_at	Tk2	0.0433721	0.160326	5.35789	4.76079	0.516725	1.85319	0.616129	0.0945901	0.965979	0.482472
101357_at	Ap2a1	-0.0734557	-0.0374001	7.36946	6.69338	-0.712487	-0.558663	0.491798	0.589102	0.953976	0.86311
101358_at	Plcb3	-0.00333917	-0.069494	5.90603	5.5475	-0.0378266	-0.929622	0.97054	0.375205	0.998611	0.746015
101359_at	Lamb2	0.200712	0.0873006	7.24451	5.21706	1.64955	0.968699	0.128796	0.356314	0.808514	0.738654
101362_at	Mapk9	-0.00565938	0.022379	6.02688	5.36045	-0.0785954	0.293391	0.938842	0.775427	0.995898	0.935924
101363_at	Adora2a	-0.191687	-0.00219258	8.29785	7.79371	-2.1171	-0.0322523	0.0592064	0.974927	0.687107	0.99395
101364_at	Adora2a	-0.077332	0.0202971	7.03226	6.80307	-0.932133	0.299121	0.372346	0.771182	0.922918	0.935121
101366_f_at	Nvl	0.0255821	0.0310375	4.99289	5.03704	0.282074	0.294366	0.783406	0.774704	0.983753	0.935777
101367_at	Dctn1	0.0669459	0.124065	9.22909	7.9426	0.567341	1.2642	0.58249	0.235798	0.965979	0.662461
101368_at	Rhox5	-0.0660015	0.0377572	6.33203	6.17156	-0.759161	0.447534	0.464571	0.664354	0.945453	0.89876
101369_at	Zfp213	-0.0655158	0.072427	7.7137	7.20737	-0.972542	1.04302	0.3528	0.322328	0.917725	0.721684
101370_at	Kpna1	0.0450394	-0.0300383	5.74306	5.2514	0.490464	-0.256434	0.633962	0.802992	0.969836	0.946259
101371_at	Cpsf4	-0.00768071	-0.125326	8.36182	8.08606	-0.0806878	-1.69224	0.937218	0.122532	0.995898	0.532504
101372_at	Trip13	0.0247157	0.0404749	5.35172	4.56253	0.260733	0.417836	0.799375	0.685199	0.983753	0.90711
101374_at	NA	-0.253083	-0.117436	6.11174	5.62948	-1.72798	-0.95598	0.113439	0.362385	0.787908	0.741705
101375_at	Gm10228	-0.107557	-0.124714	7.52595	7.14187	-1.16981	-1.37483	0.268121	0.20022	0.895745	0.629207
101376_at	Gm10229	-0.101087	-0.0659013	6.84914	6.34477	-0.899295	-0.874049	0.38879	0.40329	0.926885	0.764432
101377_at	Anapc1	-0.223949	0.0369642	4.92252	4.46439	-1.75438	0.427759	0.108656	0.678202	0.778106	0.90369
101380_at	Nudt14	0.0784788	-0.107085	7.90171	7.36816	0.799493	-0.997038	0.441835	0.343056	0.940698	0.73125
101381_at	Rabep1	-0.156504	-0.214252	6.13258	5.24756	-1.9079	-2.35062	0.0842972	0.041428	0.752764	0.358526
101382_at	Pbx2	-0.154283	-0.103462	6.49197	5.70214	-2.13483	-1.07127	0.057442	0.310072	0.685056	0.713682
101383_at	Tnnt1	-0.0198356	-0.0693399	6.98782	7.2516	-0.273175	-0.926816	0.790053	0.376589	0.983753	0.746534
101384_at	Degs2	-0.0745539	-0.0491182	7.87503	7.67692	-0.940923	-0.829912	0.36803	0.426614	0.922568	0.777776
101385_at	Mbd3	0.0705067	-0.124001	10.2587	9.53775	0.937226	-1.70564	0.369841	0.119947	0.922568	0.529263
101386_at	Mptx1	-0.0968054	-0.00461896	5.24498	5.22593	-0.976589	-0.0579455	0.350884	0.954973	0.916955	0.990755
101387_at	Acy1	0.105108	-0.00625885	9.11546	8.00926	0.939252	-0.048401	0.368848	0.962382	0.922568	0.991815
101388_at	Pgk2	-0.145097	0.0660504	4.82715	4.26971	-1.50864	0.948659	0.161076	0.365914	0.840449	0.742752
101389_at	Scarb2	-0.0588677	0.1445	7.47831	8.34152	-0.651358	1.28079	0.528908	0.230152	0.954047	0.657096
101390_at	Muc3	-0.0212716	-0.0158164	5.36171	4.80288	-0.263343	-0.237613	0.797416	0.817143	0.983753	0.951532
101392_at	Chmp7	-0.0771861	-0.307202	8.33522	7.57064	-1.11335	-3.34709	0.290562	0.00775681	0.905097	0.169348
101393_at	Anxa3	0.207421	0.135187	7.00476	5.24641	1.09791	1.24517	0.296947	0.242417	0.907567	0.670272
101394_at	Sgcg	0.0574243	0.0149961	4.25689	3.87993	0.642694	0.178022	0.534298	0.862382	0.955881	0.966388
101395_at	Purb	0.09155	0.0638976	8.02967	7.74174	1.0962	0.993378	0.29766	0.344747	0.907907	0.732302
101396_at	Hnf1b	-0.4822	-0.104458	8.14529	5.35717	-3.91003	-1.59457	0.00269089	0.142953	0.183627	0.559974
101397_at	Slc2a8	-0.0319747	-0.0879961	8.47571	8.11165	-0.431611	-1.17338	0.674812	0.268752	0.975344	0.685679
101398_at	Stxbp2	0.31909	0.134269	8.82158	7.77554	2.91798	1.23874	0.0147307	0.244687	0.420955	0.670783
101399_at	Hspg2	-0.073584	-0.00494621	9.36681	9.27975	-0.743331	-0.0490877	0.473696	0.961849	0.948837	0.991815
101401_at	Bet1	-0.178801	0.0237768	5.68821	5.83969	-1.35037	0.109274	0.205476	0.915221	0.867292	0.98067
101402_at	Med24	0.0585535	-0.0127523	8.68112	7.80131	0.731595	-0.207773	0.480533	0.83972	0.950713	0.960031
101403_at	Ccl25	-0.0106404	0.0157777	6.02605	5.78557	-0.121559	0.173968	0.905559	0.865481	0.994689	0.966824
101404_at	Ccdc115	0.074196	0.172956	3.99133	3.55957	0.676272	1.59332	0.513588	0.143233	0.954047	0.560145
101405_at	Smarcd1	0.12732	0.0568501	8.12006	7.8121	1.44507	0.939999	0.17781	0.37012	0.854364	0.74367
101406_at	Sult2b1	-0.0990712	-0.0128527	5.94762	5.06854	-1.14775	-0.184403	0.276721	0.857509	0.899198	0.965259
101407_at	Fxn	0.00650994	-0.100929	6.96729	6.3776	0.0643854	-0.69228	0.949881	0.505055	0.996649	0.819431
101408_at	Gamt	0.010861	-0.359983	8.24212	10.6287	0.0868622	-1.79835	0.932426	0.103373	0.995898	0.495857
101409_at	Eif2d	-0.150876	-0.23504	8.23591	7.2177	-1.54716	-2.94278	0.151616	0.0152393	0.830064	0.237886
101410_at	Cldn4	-0.00589788	-0.123705	7.45837	6.71056	-0.0485191	-1.01614	0.962219	0.334329	0.998172	0.72678
101412_at	Sh3gl3	-0.147247	-0.0737784	6.97291	6.08026	-2.06748	-1.15123	0.0644237	0.277326	0.706735	0.692788
101413_at	Ubr5	-0.0596281	0.0239957	5.10771	4.59745	-0.850262	0.273471	0.414276	0.790247	0.93418	0.941082
101414_at	Lmnb2	-0.0619752	-0.0382049	6.98012	6.86528	-0.774957	-0.623473	0.455579	0.547406	0.94272	0.840011
101415_i_at	Gpank1	-0.128626	-0.0302695	5.20111	4.66298	-1.34059	-0.293213	0.208527	0.775559	0.868176	0.935924
101416_f_at	Gpank1	0.034469	-0.262119	8.81049	8.11141	0.481698	-4.30316	0.63997	0.00168101	0.970937	0.0718921
101417_at	Dmrtb1	0.00299529	-0.192413	6.52248	6.04817	0.0451532	-1.90454	0.964838	0.0869981	0.998172	0.46723
101419_at	Tubb4a	-0.0488638	-0.0254791	8.8296	8.45765	-0.464387	-0.216119	0.651915	0.833389	0.971884	0.958213
101420_at	Slc32a1	-0.0573318	-0.0338692	4.90066	4.61807	-0.695341	-0.553377	0.502042	0.592576	0.954047	0.865305
101421_at	Rnf5	0.0692929	-0.153786	10.0368	9.85127	0.735871	-1.14873	0.478035	0.278306	0.950182	0.693296
101422_at	Fnbp4	-0.0650037	0.308975	7.3727	6.43144	-0.811767	2.55402	0.435063	0.0293882	0.940487	0.315149
101423_at	Ddx46	-0.0758816	0.0216883	7.44586	6.93686	-0.689537	0.320436	0.50554	0.755459	0.954047	0.930711
101424_at	Nmi	0.0614304	0.313023	5.72667	6.35308	0.58674	1.34188	0.569862	0.210311	0.964618	0.638397
101425_at	Gss	0.022995	-0.00569466	10.9367	9.14936	0.327944	-0.0660851	0.749444	0.948657	0.979894	0.989793
101426_at	Cerk	0.116735	0.176955	6.37851	4.76236	1.35253	2.12502	0.204805	0.0604585	0.867292	0.409439
101428_at	Ace	-0.0524637	-0.0213148	6.43458	6.23681	-0.572261	-0.29729	0.579273	0.772538	0.965979	0.935465
101429_at	Ddit3	-0.0672353	-0.420262	7.78595	7.06655	-0.663514	-4.02246	0.521399	0.00260236	0.954047	0.0975924
101430_at	Sox4	0.227816	-0.15577	7.79801	6.36563	3.02174	-1.28116	0.012292	0.230026	0.386431	0.656887
101431_at	Rdh5	0.0354244	-0.145724	7.99373	8.25728	0.460663	-1.90066	0.654498	0.0875511	0.972514	0.468364
101432_at	Trp53i13	0.12419	0.05316	7.25143	6.87127	1.09217	0.808343	0.299348	0.438339	0.908464	0.782363
101433_at	Mr1	-0.107132	0.00268017	5.09171	4.68377	-1.10612	0.0349075	0.293541	0.972864	0.905915	0.9929
101435_at	Akap2	-0.142276	-0.125552	7.25837	6.76515	-2.26188	-1.78942	0.0461886	0.104874	0.646655	0.499491
101436_at	Cxcl9	-0.0100653	0.132211	5.16058	7.30685	-0.0991893	0.549028	0.922869	0.595443	0.995898	0.867133
101437_at	Slk	-0.135017	0.0775222	6.28989	5.02181	-1.37553	0.885496	0.197794	0.397388	0.864599	0.761131
101439_at	Arl6	0.0278058	0.0794389	8.3332	5.07974	0.234286	0.639054	0.819299	0.537639	0.983851	0.83486
101440_at	Macrod2	-0.321261	-0.282461	7.0246	6.29957	-3.9982	-3.69852	0.00232432	0.00436501	0.169744	0.129478
101441_i_at	Itpr2	-0.228118	-0.084964	9.49265	8.42312	-1.37501	-0.344862	0.197948	0.737585	0.864599	0.925393
101442_f_at	Itpr2	-0.191366	-0.0777434	8.80128	8.11199	-1.90928	-0.462746	0.0841032	0.65379	0.752764	0.893862
101443_at	Plekhh1	-0.115884	-0.20854	6.45744	5.6237	-1.12098	-2.31197	0.287447	0.0442119	0.904411	0.366097
101444_at	Thumpd3	0.053961	0.106456	8.09808	7.43065	0.690906	1.217	0.504713	0.25249	0.954047	0.67519
101445_at	Dnmt1	-0.0462367	-0.185306	8.49576	8.11915	-0.447954	-2.36228	0.663349	0.0406229	0.974465	0.356113
101446_at	Tpd52l1	0.31694	0.344366	7.98078	6.67949	2.97243	4.38782	0.0133955	0.00147657	0.404911	0.065855
101447_at	Apc	-0.0325466	-0.0936479	6.85567	6.3501	-0.347364	-1.40846	0.735227	0.190346	0.979115	0.616589
101448_at	Hgs	-0.045242	0.0814677	11.0321	10.6022	-0.699956	1.20662	0.499272	0.256284	0.954047	0.678558
101449_at	Trim41	0.0663536	0.190486	7.3226	6.46535	0.623762	1.4351	0.546186	0.182822	0.958511	0.611942
101450_at	Csf1	-0.328019	-0.124672	8.41745	7.544	-2.82011	-1.56549	0.0174776	0.149594	0.465374	0.569349
101451_at	Peg3	0.241239	-0.0731028	7.28792	5.31905	2.13322	-0.501931	0.0576	0.626953	0.685056	0.881192
101453_at	Mia	0.0587269	-0.0491575	6.79755	6.68533	0.660933	-0.703288	0.522988	0.498469	0.954047	0.815836
101455_at	Umps	-0.0715597	-0.040405	6.09945	6.30931	-0.791221	-0.61238	0.446438	0.554422	0.940698	0.843623
101456_at	Zfp106	0.0754712	0.0437352	9.24874	8.65151	0.677971	0.751265	0.512553	0.470393	0.954047	0.799872
101457_at	Jak2	0.197958	-0.0174222	7.07365	5.69164	1.93368	-0.168294	0.0807397	0.869822	0.751914	0.968054
101458_at	Wee1	-0.00900468	-0.0400846	6.4426	5.3222	-0.0807867	-0.414123	0.937141	0.687825	0.995898	0.908402
101459_at	Chd1	-0.224704	0.119134	7.80459	7.68756	-1.64291	0.640355	0.130177	0.536829	0.809183	0.834752
101461_f_at	Pja1	-0.079262	-0.143435	9.76784	9.74395	-1.20052	-1.50632	0.256498	0.163953	0.892401	0.590212
101462_r_at	Pja1	-0.136456	0.0551497	3.90068	3.53244	-1.95872	0.519563	0.0774184	0.615059	0.746981	0.874716
101463_at	Apoc4	0.192846	-0.141118	7.40076	12.3581	1.18689	-1.86723	0.261605	0.0924543	0.894019	0.477687
101464_at	Timp1	-0.10331	0.0172005	10.1664	9.85167	-0.992911	0.225775	0.343234	0.82608	0.916228	0.955928
101465_at	Stat1	-0.47547	-0.186079	4.55134	5.37617	-5.78214	-0.925587	0.000150699	0.377196	0.033606	0.747331
101466_at	Pigf	-0.141676	0.103341	7.11577	5.7563	-1.71019	0.725244	0.116772	0.485493	0.793198	0.80761
101467_at	S100b	-0.0165739	-0.00931701	4.72204	4.40731	-0.161566	-0.116731	0.874735	0.909463	0.988109	0.979506
101468_at	Cfp	-0.019609	0.973038	4.63976	6.1349	-0.185314	2.10119	0.856538	0.0629037	0.985848	0.416747
101469_at	Nedd9	-0.141313	0.10203	6.75251	4.83508	-1.19885	0.924374	0.257119	0.377796	0.892401	0.747903
101470_at	Wdr78	-0.0425596	-0.0917693	6.55706	5.95076	-0.555572	-1.11779	0.590223	0.290676	0.965979	0.702006
101471_at	Pklr	-0.115278	-0.288313	6.17484	8.77207	-1.19408	-1.81752	0.258902	0.100221	0.892646	0.491805
101472_s_at	Pklr	-0.0179797	-0.0441742	8.09896	8.39937	-0.255096	-0.334599	0.80361	0.745076	0.983753	0.927853
101473_at	Nnmt	0.0338859	0.373393	6.90935	9.4187	0.391495	1.92729	0.703312	0.0838197	0.978151	0.460511
101474_at	Mbl1	-0.03234	-0.102672	6.56256	8.46596	-0.447161	-0.998729	0.663904	0.342276	0.974465	0.73125
101475_at	Bmi1	-0.0407588	-0.11928	8.26919	7.39675	-0.293724	-1.44501	0.774732	0.180088	0.983753	0.610923
101476_at	Pabpn1	-0.0591547	-0.127961	9.00453	8.10308	-0.483822	-1.25474	0.638512	0.23907	0.970937	0.666833
101480_at	Dnal4	0.0699735	0.0185347	8.16093	6.94393	0.765179	0.275703	0.461132	0.788582	0.943606	0.940664
101481_at	Rnf34	0.21427	-0.115323	6.44609	5.65452	2.17261	-1.04531	0.0538461	0.321324	0.676663	0.720952
101482_at	Ppp1cc	0.166638	-0.0259567	9.05615	8.01791	2.17008	-0.278945	0.0540803	0.786165	0.676663	0.939666
101483_at	Ccndbp1	0.0232322	0.149974	9.10527	8.22181	0.290529	2.20312	0.777108	0.0530696	0.983753	0.391468
101484_at	Nbr1	-0.0428179	0.0592792	9.21351	8.9458	-0.296999	0.513942	0.772299	0.618838	0.983753	0.876793
101485_at	NA	0.246537	0.189289	9.67837	9.20948	2.4638	1.94378	0.032555	0.081585	0.579177	0.458284
101486_at	Psmb10	0.176736	-0.0683471	9.20692	9.18839	1.22272	-0.435559	0.248349	0.672724	0.889115	0.901393
101487_f_at	Ly6e	0.0425491	0.0351362	12.1724	12.5215	0.398459	0.196829	0.698329	0.848039	0.978151	0.962668
101488_r_at	Ly6e	-0.0433453	-0.125584	6.93754	6.54931	-0.451278	-1.7181	0.661029	0.117586	0.974465	0.524079
101489_at	NA	-0.613419	0.0762673	8.20255	7.64315	-3.29991	0.365824	0.00758555	0.722377	0.324412	0.919153
101490_at	Isca1	-0.171551	0.117318	9.14001	8.22608	-1.74545	1.60744	0.110253	0.140098	0.781425	0.557712
101492_at	NA	0.346687	0.236353	6.66864	5.5328	3.25828	1.45113	0.00815137	0.178418	0.330561	0.609289
101493_at	Afp	-0.0658203	-0.0586535	6.90378	6.53011	-0.9079	-0.545007	0.384433	0.5981	0.925848	0.867978
101494_at	Afp	-0.158508	-0.0382691	6.76231	6.65666	-1.7879	-0.322067	0.102845	0.754261	0.773641	0.930711
101495_at	Cd81	0.140268	0.0991394	9.8514	9.29094	1.78543	0.888806	0.103263	0.395693	0.773641	0.759783
101498_at	Impa1	-0.145231	-0.373913	7.77039	7.59198	-1.73359	-2.71589	0.112408	0.0223499	0.785452	0.281824
101499_at	Ilk	0.154185	0.129677	8.04121	6.89786	1.61829	1.56379	0.135416	0.14999	0.81187	0.569572
101500_at	Epb4.1l2	0.0203228	0.0904499	6.86318	5.89206	0.261247	1.17575	0.79899	0.267849	0.983753	0.685531
101501_r_at	Impact	0.0886905	0.167966	4.68321	3.84338	1.24538	1.82678	0.240248	0.0987304	0.880883	0.490042
101502_at	Tgif1	0.176242	0.149414	7.47735	6.96466	1.98036	1.88896	0.0746521	0.0892394	0.742984	0.471182
101503_at	Dpysl3	-0.0974404	0.0313132	5.61634	5.49374	-1.19105	0.268077	0.260038	0.794275	0.893652	0.941808
101505_at	Tbc1d20	-0.123927	0.0629996	9.06376	8.29376	-1.19509	0.870865	0.258524	0.404943	0.892401	0.765736
101506_at	Snrpa1	0.19628	0.0846892	6.16441	5.95601	2.33248	1.18786	0.040887	0.263264	0.6265	0.683437
101507_at	Scnm1	-0.116491	0.0650856	6.92466	6.9016	-1.00749	0.758846	0.336506	0.46605	0.913255	0.797593
101508_at	Khdrbs1	-0.003567	-0.00159089	7.53752	6.55799	-0.0366706	-0.0193306	0.97144	0.984971	0.998611	0.996307
101509_at	Vbp1	0.14918	0.184468	8.93761	7.47314	0.766148	2.30698	0.460579	0.0445847	0.943606	0.366249
101510_at	Psme1	0.333793	0.0432767	9.56343	9.11371	2.5042	0.206972	0.0303437	0.840328	0.570682	0.960236
101511_at	Ssr4	0.0445271	0.0628532	4.474	4.21134	0.575071	0.751929	0.57744	0.470011	0.965979	0.799565
101513_at	Pfdn5	-0.117243	-0.0634061	6.93349	6.61998	-0.980518	-0.724078	0.349031	0.486177	0.916955	0.80761
101514_at	Trappc3	0.196907	0.113126	8.11047	7.44584	1.96499	1.31525	0.0766076	0.218778	0.746981	0.645269
101515_at	Acox1	0.0967457	0.0787346	8.64176	10.1014	0.936162	0.898298	0.370363	0.390859	0.922568	0.757036
101516_at	Cd59a	0.132337	-0.336978	10.2456	9.982	0.881255	-2.36348	0.398037	0.0405407	0.930056	0.356113
101517_at	Tex261	-0.0503137	-0.106906	9.26398	9.30435	-0.515165	-1.01834	0.617181	0.333334	0.966122	0.726378
101518_at	Ift20	0.155053	-0.258994	6.33491	6.27285	1.64497	-4.03641	0.129748	0.00254581	0.808934	0.0962932
101519_at	Srp14	0.145187	0.00831089	9.79947	9.22149	1.41476	0.0580718	0.186298	0.954875	0.859538	0.990755
101520_at	Spata6	-0.100022	-0.0744827	8.14219	6.75344	-1.4107	-1.0313	0.187461	0.327518	0.859585	0.723244
101521_at	Birc5	-0.0550628	0.0152521	5.52186	3.8905	-0.291574	0.245285	0.776331	0.811366	0.983753	0.949241
101522_at	Tm4sf1	-0.103322	-0.0696323	5.02927	4.88944	-1.05984	-0.976723	0.313147	0.352522	0.910437	0.73654
101523_at	Hnrnpa3	0.235039	0.363237	9.90537	9.19431	1.36277	1.53976	0.201658	0.155696	0.86616	0.577466
101524_at	Hnrnpa3	-0.0587397	0.180082	4.16432	3.64808	-0.507139	1.18273	0.622609	0.265198	0.966715	0.683925
101525_at	Ndufb10	0.336452	-0.343774	10.8025	10.1483	3.12385	-2.11284	0.0102909	0.0616967	0.356979	0.413216
101526_at	Msx1	-0.0127252	-0.0878795	8.65246	8.18786	-0.115159	-1.21324	0.910506	0.25386	0.995626	0.676137
101527_at	Tcea1	0.00728441	0.132264	9.31319	8.77595	0.0532025	1.02056	0.958576	0.332334	0.998172	0.726288
101528_at	Tcea1	-0.0608168	0.239213	7.71576	7.31131	-0.300685	2.72256	0.769564	0.0220992	0.983615	0.281415
101529_g_at	Tcea1	0.0245265	0.215065	7.54025	7.17164	0.157742	1.81337	0.877673	0.100895	0.988109	0.491834
101530_at	Eftud2	-0.0180173	0.118245	8.07857	7.02137	-0.127137	1.18015	0.90125	0.266174	0.994545	0.684656
101531_at	Aldob	0.0459809	0.177269	11.8864	12.0189	0.360541	2.01896	0.725639	0.0720874	0.979115	0.433626
101532_g_at	Aldob	-0.0278507	0.156058	11.8612	11.8642	-0.172968	1.40959	0.865988	0.190022	0.987261	0.616589
101534_at	Tnp2	-0.063223	-0.159217	7.7957	7.13319	-0.858548	-2.30871	0.409891	0.0444549	0.932663	0.366249
101536_at	Ncor1	-0.170691	-0.162347	8.59084	7.73002	-1.64011	-2.23306	0.130763	0.0504743	0.80938	0.384825
101537_at	Ces1c	0.512672	0.153701	5.15752	11.9973	1.8567	1.48203	0.0917975	0.170188	0.765336	0.599512
101538_i_at	Ces1d	-0.0339785	0.0675587	9.33344	11.4201	-0.178095	0.499886	0.862061	0.62834	0.986536	0.881752
101539_f_at	Ces1d	0.0149355	0.163983	8.3985	10.9764	0.0753556	1.17935	0.941358	0.266478	0.995898	0.684774
101540_at	NA	0.152019	0.446872	8.16347	7.45408	1.81992	4.65644	0.0975598	0.000985109	0.770306	0.0515226
101541_at	NA	-0.144642	-0.0442604	6.77856	6.46951	-1.70198	-0.738232	0.118338	0.477918	0.796734	0.803433
101542_f_at	Ddx3x	0.338384	0.36232	9.03853	8.66789	2.18316	1.2143	0.0528816	0.253472	0.673085	0.675792
101543_f_at	Tuba1c	0.270168	0.0947135	11.7044	11.2496	2.76497	0.579318	0.0192457	0.575629	0.472573	0.856687
101546_at	Neu1	-0.316255	-0.233372	9.06399	6.99418	-2.81094	-2.53231	0.0177598	0.0304869	0.469705	0.317267
101548_at	Synj2bp	-0.143183	-0.19387	4.44175	4.67516	-1.99246	-1.89381	0.0731455	0.0885353	0.735401	0.47008
101550_at	Tes	-0.0381824	-0.0950219	4.02501	3.51892	-0.481571	-1.41489	0.640057	0.188507	0.970937	0.616249
101551_s_at	Tes	0.0676636	0.0145559	6.6754	4.89132	0.668144	0.134601	0.518556	0.89569	0.954047	0.97476
101552_at	Slc34a1	0.122011	-0.159002	11.9402	5.33366	0.983179	-1.99057	0.34778	0.0755442	0.916955	0.445464
101553_at	Fga	0.728951	-0.0407867	7.83454	11.2415	7.09647	-0.522894	2.65699e-05	0.612825	0.0103689	0.873647
101554_at	Nfkbia	0.945627	0.995194	9.81555	9.38939	7.85627	4.34868	1.07322e-05	0.0015676	0.00496382	0.0686883
101555_at	Rac1	-0.0363874	0.213387	11.1268	10.641	-0.387751	2.41769	0.705998	0.0369998	0.978151	0.345442
101557_at	Bckdk	0.118078	-0.116874	9.17842	8.09413	1.40773	-1.42144	0.188315	0.186646	0.859585	0.614349
101558_s_at	Psmb5	0.103402	-0.0347731	9.77673	9.22209	0.84813	-0.242695	0.415409	0.813315	0.934634	0.949789
101560_at	Emb	-0.00190703	-0.0633269	7.79941	5.76111	-0.0195846	-0.932483	0.984744	0.373798	0.999683	0.74546
101561_at	Mt2	1.5238	3.34329	11.126	11.4754	13.1136	13.1592	8.18702e-08	1.73023e-07	0.00010224	0.000314778
101562_at	Hspa14	0.130096	0.107611	6.15379	5.72236	1.40715	0.728832	0.188481	0.483393	0.859585	0.806603
101564_at	Cnot7	-0.036147	-0.0765124	4.62088	4.11856	-0.343165	-1.01149	0.738292	0.336439	0.979115	0.728913
101565_f_at	Serpina1c	0.620289	-0.0227144	8.93372	13.8557	1.75192	-0.341696	0.109094	0.739894	0.779833	0.925848
101566_f_at	NA	0.365019	-0.406133	5.79863	12.3779	1.22234	-2.05044	0.248487	0.0684305	0.889115	0.427607
101567_at	Prosc	0.032596	-0.0262927	7.36502	7.02036	0.466185	-0.297512	0.65067	0.772372	0.971884	0.935356
101568_at	Prosc	0.272079	0.154743	8.79597	7.7447	1.85391	2.02699	0.0922226	0.0711369	0.765336	0.43166
101569_at	Krt71	-0.0998606	-0.117024	7.74586	7.253	-1.0748	-1.38837	0.306702	0.196194	0.909045	0.623269
101570_at	Igfbp4	-0.0778473	-0.134356	4.98918	4.96586	-0.906965	-1.49508	0.384904	0.166814	0.925848	0.593642
101571_g_at	Igfbp4	0.124534	0.0240737	10.539	11.0887	0.820318	0.250992	0.430387	0.807076	0.938969	0.947878
101572_f_at	NA	0.583802	-0.001541	7.25743	13.6563	1.45847	-0.0234754	0.174164	0.981749	0.848758	0.995702
101573_f_at	NA	0.261253	0.0506622	11.9375	11.5111	2.6917	0.497732	0.0218751	0.629803	0.497804	0.882437
101574_f_at	Serpina1e	0.408174	0.0187865	8.67566	13.4749	1.37475	0.264723	0.198029	0.796783	0.864599	0.943239
101575_i_at	NA	0.492481	-0.038959	6.92844	10.1949	1.36594	-0.482982	0.200693	0.639863	0.86616	0.887236
101576_f_at	Serpina1b	0.633256	-0.00941604	8.50002	13.8701	1.64896	-0.141908	0.128918	0.890068	0.808605	0.973156
101577_at	NA	0.125435	0.335492	12.2627	11.4134	1.22154	3.45522	0.248777	0.00649012	0.889115	0.157933
101578_f_at	Actb	0.175782	-0.323869	8.57788	8.25646	1.3475	-0.985023	0.206366	0.348632	0.867292	0.735259
101579_at	Srp9	0.279368	0.208971	8.93298	8.83153	2.74911	2.16862	0.0197867	0.0562188	0.477021	0.398358
101580_at	Cox7b	0.0753291	-0.104817	10.4952	9.91157	0.581593	-0.749866	0.573197	0.471196	0.965979	0.800246
101581_at	Ube3a	-0.227931	-0.252745	5.88968	4.9549	-2.00177	-1.44487	0.0720053	0.180126	0.731365	0.610923
101582_at	Gnl2	0.171211	0.357383	7.23179	6.78313	1.77724	3.86393	0.104662	0.0033464	0.774029	0.113126
101583_at	Btg2	0.241147	0.261662	9.60659	8.76725	3.26131	2.90246	0.0081088	0.0163103	0.330561	0.245466
101584_at	Rsu1	0.0133298	-0.041891	8.74802	8.14162	0.176025	-0.509464	0.863646	0.621857	0.986536	0.878821
101585_at	Pgrmc1	0.0447744	-0.207757	9.41904	10.7614	0.245717	-1.28715	0.81067	0.228014	0.983851	0.654831
101587_at	Ephx1	-0.0489044	-0.280834	9.10522	10.1016	-0.510212	-1.70828	0.620528	0.119442	0.966576	0.528746
101588_at	Slc16a1	0.0996358	0.199956	3.95682	4.08833	1.00008	1.53888	0.339912	0.155909	0.913661	0.57762
101589_at	NA	0.320791	0.329263	6.99118	5.87287	1.9022	3.007	0.0851031	0.0136792	0.752764	0.225066
101590_at	Lamp2	-0.180747	-0.197134	10.3082	9.88039	-0.831199	-0.824669	0.424484	0.429445	0.936928	0.779067
101591_at	Xpnpep1	0.0442016	0.0767976	9.23251	7.56849	0.315262	0.941844	0.758782	0.36922	0.98017	0.74367
101593_at	Crip2	-0.0171925	0.248506	7.90855	8.15129	-0.141663	1.67613	0.890046	0.125708	0.992489	0.536698
101595_at	NA	-0.143321	-0.0511	5.71574	4.92782	-1.25632	-0.545156	0.236414	0.598002	0.880336	0.867978
101596_at	C78859	0.0223715	0.0388456	4.80119	4.6253	0.247324	0.525868	0.809459	0.610834	0.983851	0.873067
101597_at	D12Ertd216e	-0.0450251	-0.0947397	6.07777	5.39317	-0.417263	-0.949545	0.684947	0.365485	0.975946	0.742752
101598_at	NA	-0.033333	-0.0748055	6.87658	6.67038	-0.328708	-1.07985	0.748882	0.30642	0.979894	0.71126
101599_at	C030018P15Rik	-0.0643733	-0.0378038	7.49958	7.05911	-0.970229	-0.420953	0.353898	0.682998	0.918336	0.905674
101600_at	C79015	-0.0743708	-0.0349913	7.85009	7.33847	-0.909389	-0.391108	0.383682	0.704201	0.925848	0.91347
101601_at	DXErtd223e	-0.0395232	-0.201437	5.2118	5.13363	-0.428579	-2.96448	0.676948	0.0146928	0.975344	0.23398
101602_at	NA	-0.138416	-0.0601607	8.44401	7.99018	-1.79232	-0.913171	0.102099	0.383369	0.773641	0.750697
101603_g_at	NA	-0.155741	-0.0571356	6.79906	6.64896	-1.53376	-0.708416	0.15485	0.495419	0.834314	0.814052
101604_at	C79296	-0.0768763	-0.00702347	3.60364	3.37366	-1.11544	-0.11124	0.289709	0.913703	0.904602	0.980464
101605_at	D3Ertd246e	0.00871549	-0.0425385	4.62269	4.08768	0.135409	-0.628807	0.894867	0.544051	0.993879	0.838324
101606_at	D1Ertd259e	-0.00369366	-0.0164294	7.42543	7.05004	-0.0460515	-0.200993	0.964139	0.844871	0.998172	0.961565
101607_at	C80068	-0.221456	-0.0749147	6.39358	5.95205	-2.21474	-0.895596	0.0500914	0.39223	0.662016	0.757816
101608_at	C80360	-0.0479831	-0.0522788	5.00511	5.08802	-0.656713	-0.793873	0.525592	0.446325	0.954047	0.787129
101609_at	Slc5a11	-0.149807	0.00253852	8.6358	8.21643	-1.98429	0.0360044	0.0741585	0.972012	0.740873	0.992679
101610_at	Oxsm	-0.059289	-0.0961801	5.75176	5.23082	-0.753932	-1.29327	0.467573	0.225978	0.94649	0.653355
101611_at	D11Ertd326e	-0.121066	-0.14525	6.79	6.39893	-1.2533	-1.88864	0.237469	0.0892858	0.880336	0.471182
101612_at	C81600	-0.045571	-0.0788054	6.2393	5.8695	-0.475035	-0.608366	0.644555	0.556972	0.971884	0.84559
101613_at	NA	-0.0699275	-0.159457	6.34193	5.87472	-0.676242	-2.10863	0.513606	0.0621305	0.954047	0.414648
101614_at	NA	0.00108248	-0.218629	5.20875	4.73071	0.0104215	-2.65374	0.991882	0.0248271	0.999683	0.292
101615_at	NA	-0.0396168	-0.152334	7.21113	6.34791	-0.38645	-1.47095	0.706932	0.173102	0.978151	0.6018
101616_at	NA	-0.0957533	-0.000450618	7.17518	6.96478	-1.09858	-0.00396256	0.296668	0.996919	0.907567	0.999263
101617_s_at	Trp53-ps	-0.0983308	0.123206	6.34471	6.14097	-0.71128	1.41685	0.492514	0.187948	0.953976	0.615713
101618_r_at	Trp53-ps	-0.187213	-0.138219	9.44817	8.81484	-2.68413	-1.86369	0.0221666	0.0929891	0.498768	0.479008
101619_at	NA	0.0328582	0.00827038	4.03165	3.71127	0.319282	0.0836836	0.755817	0.935016	0.979894	0.985513
101620_at	Gp1ba	-0.0194341	-0.0569494	4.84217	4.67266	-0.219255	-0.867538	0.830684	0.406674	0.983851	0.766636
101621_at	Scgb1b2	-0.110384	-0.0726316	8.19555	7.29413	-1.16207	-0.766892	0.271113	0.46147	0.896754	0.79442
101622_at	Alx4	-0.103742	-0.131809	8.3547	7.9219	-1.2366	-1.87178	0.243362	0.0917732	0.885121	0.47594
101623_at	Slc16a8	-0.054061	-0.0935774	7.53234	7.10069	-0.745017	-0.834167	0.472718	0.424327	0.948604	0.776055
101624_at	Kcns1	0.0402623	0.0135497	6.51172	5.93752	0.461317	0.200494	0.654044	0.845251	0.972229	0.961721
101625_at	Kcns2	-0.0591101	-0.195103	5.79773	5.33392	-0.612493	-2.19327	0.553333	0.053951	0.960572	0.393107
101626_at	Adam7	0.0446228	-0.294404	6.69494	6.23188	0.433362	-3.49335	0.67358	0.00609638	0.974762	0.151657
101627_at	Pld1	-0.0947909	-0.00804775	6.35189	5.33459	-0.834577	-0.0743016	0.422663	0.942286	0.936581	0.988123
101628_g_at	Pld1	0.0567003	0.014925	5.04055	4.68519	0.616949	0.247694	0.550501	0.809555	0.959895	0.949127
101629_s_at	Stx1b	0.0182602	-0.131105	3.57893	3.18262	0.251936	-1.63855	0.805987	0.133407	0.983753	0.547661
101630_f_at	NA	-0.0659681	-0.0445563	6.49849	5.85643	-0.722762	-0.578962	0.485721	0.57586	0.95112	0.856771
101631_at	Sox11	-0.307132	-0.0750556	6.04364	5.36921	-2.39963	-0.614104	0.0363951	0.553328	0.598222	0.843297
101632_at	Tnfrsf11a	-0.0789539	-0.116405	7.37474	6.87018	-1.03307	-1.31334	0.324935	0.219396	0.913091	0.645269
101633_at	NA	0.0282664	-0.00313172	6.86246	6.68096	0.281626	-0.0300067	0.78374	0.976672	0.983753	0.994441
101634_at	Npm1	0.26463	0.402371	9.54558	9.11954	1.55149	2.87574	0.150582	0.0170618	0.828403	0.251011
101635_f_at	Mup5	0.120149	-0.586347	7.07921	12.4653	0.876154	-3.45491	0.400679	0.00649351	0.930056	0.157933
101636_at	Mucl1	-0.0781827	0.0184913	4.60526	4.22595	-0.823672	0.26237	0.428562	0.798544	0.937814	0.944161
101637_at	Ceacam10	-0.0649131	0.0663187	5.56694	4.97171	-0.740411	0.740091	0.475391	0.47684	0.94956	0.80311
101638_s_at	NA	0.49317	0.159763	5.02773	11.4392	1.73339	0.869838	0.112445	0.405476	0.785452	0.76605
101639_r_at	Cyp3a16	0.0523915	-0.0914937	3.88873	5.16758	0.566213	-0.468223	0.583228	0.650007	0.965979	0.892425
101640_f_at	NA	-0.0818607	-0.0683182	7.41119	6.90409	-0.872774	-0.787152	0.402436	0.450067	0.930056	0.788609
101641_at	Igk	0.0686899	0.0367898	4.37349	3.78586	0.768447	0.483188	0.459271	0.639722	0.943606	0.887236
101642_at	NA	-0.053261	-0.0299913	8.33952	8.15653	-0.664673	-0.444901	0.520687	0.66619	0.954047	0.89877
101643_at	Stx1b	-0.038137	-0.0419832	6.78637	6.33409	-0.503254	-0.5231	0.625245	0.612687	0.966715	0.873647
101644_f_at	NA	-0.055255	-0.158545	6.11283	5.52024	-0.583651	-1.7133	0.571862	0.11849	0.965979	0.52621
101645_f_at	Vmn2r89	-0.132814	-0.175957	7.50977	6.76516	-1.61754	-1.88009	0.135579	0.0905385	0.81187	0.474264
101646_at	Pigq	-0.0870711	-0.153265	6.4785	5.9131	-1.09377	-1.49001	0.298676	0.168117	0.908464	0.596256
101647_at	Adk	-0.0108968	0.0835533	5.56156	4.85497	-0.133417	1.2763	0.896403	0.231668	0.993879	0.657788
101648_at	Foxd4	-0.0558729	-0.0945611	5.96336	5.13188	-0.636548	-1.02936	0.53814	0.328384	0.958125	0.724204
101649_at	Pip5k1b	-0.0717886	-0.0728336	6.53544	6.37625	-0.83564	-0.880181	0.422091	0.40012	0.936581	0.763092
101650_at	NA	-0.00730063	-0.0324595	7.13175	6.51721	-0.0892602	-0.444704	0.930566	0.666328	0.995898	0.89877
101651_at	Cntfr	0.0962522	0.0589575	7.5174	6.98317	0.956625	0.858646	0.360408	0.411327	0.920239	0.770301
101652_i_at	H2-D4	-0.00630885	-0.041267	7.25191	6.70526	-0.0915874	-0.668612	0.928761	0.519394	0.995898	0.826776
101653_f_at	H2-D4	0.18215	0.0875903	8.50076	9.31402	1.16155	0.873475	0.271313	0.403587	0.896754	0.764447
101654_at	Hist1h2bb	0.0575218	-0.111366	5.79989	5.35374	0.457675	-1.13108	0.656574	0.285308	0.973173	0.697091
101655_at	Zfp94	-0.0558362	-0.0647176	4.17777	3.75791	-0.791814	-0.873179	0.446107	0.403741	0.940698	0.764506
101656_f_at	NA	-0.0731934	0.0244048	4.7801	4.369	-0.380851	0.284248	0.710958	0.782218	0.978151	0.938451
101657_at	Bmp8b	-0.0288307	-0.135672	5.60446	5.55272	-0.31098	-1.7669	0.761943	0.108744	0.981527	0.508422
101658_f_at	H2-Q5	0.146992	0.111478	8.27702	8.86512	1.08423	0.465192	0.302692	0.6521	0.908464	0.893597
101659_at	Hsd3b2	-0.23753	-0.39106	8.57725	7.15365	-1.17991	-2.00668	0.264251	0.0735642	0.895338	0.439135
101660_at	Mtr	-0.00521657	-0.0498436	6.26675	5.65152	-0.0649087	-0.848921	0.949474	0.416459	0.996649	0.772803
101661_r_at	NA	0.0625486	0.014576	4.32747	3.80439	0.447714	0.168451	0.663517	0.869702	0.974465	0.968054
101662_at	Suz12	0.0143253	-0.0901232	5.72065	5.4476	0.149996	-1.24649	0.88363	0.241954	0.990109	0.669366
101663_s_at	NA	0.0745224	0.0652742	4.7628	4.53941	0.921784	0.542464	0.377474	0.599784	0.924768	0.868922
101664_at	Rps3a1	0.176521	0.335451	12.0157	11.2026	1.38506	2.20864	0.194947	0.0525817	0.863872	0.390755
101665_at	Nr5a1	-0.0856992	-0.046932	10.6701	9.94948	-0.974891	-0.669809	0.351687	0.518663	0.917627	0.826652
101666_at	Nr5a1	0.104734	0.0672844	5.55648	5.45524	1.01848	0.645661	0.331496	0.533529	0.913091	0.833611
101667_at	Cwf19l1	-0.105128	-0.175809	6.33909	5.66112	-1.25598	-1.78851	0.236533	0.105028	0.880336	0.49983
101668_at	AA589418	-0.0570318	-0.0794346	7.62202	7.58364	-0.720427	-1.268	0.487097	0.234494	0.951718	0.660435
101669_at	NA	0.0402913	-0.118806	4.42914	4.28052	0.491485	-1.48796	0.633264	0.168649	0.96961	0.596457
101670_at	NA	-0.132664	-0.0451472	5.16489	4.6462	-1.7045	-0.641076	0.117855	0.53638	0.795553	0.834752
101671_at	NA	0.0176479	0.0241819	4.26903	3.96443	0.158391	0.419795	0.877174	0.683815	0.988109	0.906046
101672_at	NA	-0.0178115	-0.0310426	5.15246	5.18905	-0.209066	-0.410379	0.838425	0.690478	0.984184	0.909197
101673_r_at	AA675035	-0.0917657	-0.0578294	3.7834	3.48131	-0.599721	-0.525669	0.561496	0.610967	0.962934	0.873067
101674_at	Stk36	0.0425768	0.0382153	6.48999	6.34965	0.423271	0.464611	0.680695	0.652501	0.975502	0.893597
101675_at	NA	0.0962032	0.103538	7.49276	7.61231	0.991502	1.23708	0.34389	0.245276	0.916577	0.670889
101676_at	Gpx3	0.0728146	-0.0200684	14.2495	7.16933	0.865128	-0.283365	0.406431	0.782875	0.932537	0.938755
101677_at	1110035H17Rik	-0.0982731	-0.122498	7.78333	7.44071	-1.2067	-1.59977	0.254208	0.141793	0.891979	0.558936
101678_r_at	NA	-0.100985	-0.129297	9.49721	9.2094	-1.14233	-1.37055	0.278867	0.201507	0.89987	0.630525
101679_at	Opn1mw	-0.147001	-0.0961332	6.98245	6.77763	-1.86334	-1.22185	0.090791	0.250733	0.761449	0.674745
101680_at	Rpl27a	0.299659	-0.013693	11.3751	10.6932	2.31148	-0.117925	0.0423989	0.908542	0.633321	0.979104
101681_f_at	H2-Bl	0.0481665	-0.0456968	9.48525	10.2382	0.607733	-0.578877	0.556368	0.575915	0.961783	0.856771
101682_f_at	Mup4	0.0336873	-0.509448	6.43932	12.6082	0.327138	-2.28373	0.750036	0.0463607	0.979894	0.372317
101683_at	Gipc1	0.00292988	0.0257895	6.78423	6.34943	0.0445613	0.423313	0.965299	0.681333	0.998172	0.905256
101684_r_at	Srst	0.149218	0.0723274	9.74237	9.30491	0.720433	0.533779	0.487094	0.605554	0.951718	0.871233
101685_f_at	NA	-0.0824263	-0.109663	10.1695	9.95404	-0.969052	-1.69275	0.354458	0.122433	0.918336	0.532504
101686_at	Zfp59	-0.120798	-0.0118239	5.94143	5.83653	-1.13795	-0.148104	0.280611	0.885305	0.900138	0.971724
101687_r_at	NA	0.036442	0.0857219	3.88719	3.4695	0.545139	0.976867	0.597124	0.352455	0.965979	0.73654
101688_at	D4Ertd58e	-0.216313	-0.282128	6.55966	6.18409	-1.97142	-3.70275	0.0757831	0.00433527	0.745387	0.128902
101689_at	AA416453	0.0853117	0.185693	5.22151	4.69252	0.804318	1.79921	0.439165	0.103231	0.940698	0.495826
101690_r_at	NA	0.00077535	-0.0289154	3.65778	3.35847	0.00982305	-0.408073	0.992348	0.692114	0.999683	0.909239
101691_s_at	C77405	-0.0439583	-0.318594	5.03958	4.62595	-0.354818	-1.942	0.729797	0.081823	0.979115	0.458321
101692_r_at	C77405	0.0168059	-0.0573486	5.86073	5.29357	0.171702	-0.563385	0.866959	0.586006	0.987618	0.861736
101693_f_at	Timm8a2	0.0733931	-0.0534345	5.95447	5.72781	0.803062	-0.61034	0.439859	0.555717	0.940698	0.844566
101694_f_at	Kat7	0.0420696	-0.0905752	6.791	5.75964	0.536267	-0.78958	0.603025	0.448712	0.965979	0.788609
101695_at	Eif3e	-0.10006	-0.139789	7.41395	7.23913	-0.849274	-1.84159	0.414801	0.0963875	0.93418	0.484967
101696_r_at	NA	-0.0322996	0.190756	6.20674	5.96009	-0.309218	2.019	0.763246	0.072082	0.981527	0.433626
101697_f_at	Smg5	-0.120846	0.0234117	6.75874	5.98274	-1.82398	0.210314	0.0969074	0.83779	0.770306	0.959243
101698_f_at	Krt2	-0.167589	-0.077111	7.95972	7.42641	-1.8937	-0.920346	0.0863177	0.379793	0.753274	0.748675
101699_at	Phxr2	0.0116764	-0.114368	4.27094	3.91532	0.100544	-1.09091	0.921819	0.301765	0.995898	0.708726
101700_at	Phxr4	-0.141909	0.0553573	8.01429	7.45349	-1.31795	0.800547	0.215737	0.44263	0.874789	0.78617
101701_at	Cdh8	-0.026359	-0.0360303	3.77795	3.41832	-0.38872	-0.593306	0.705302	0.566602	0.978151	0.851366
101702_at	Rs1	-0.107981	-0.0148574	6.37709	6.16892	-1.16903	-0.185892	0.268418	0.856373	0.89602	0.96489
101703_at	NA	-0.205638	-0.0109121	9.62397	8.94411	-2.58211	-0.112817	0.0264895	0.912484	0.540524	0.980277
101704_at	Hnf4g	-0.0596117	-0.100155	4.59999	3.9737	-0.666812	-1.32456	0.519373	0.215784	0.954047	0.642977
101705_at	Phxr1	0.0789103	0.035361	6.80701	6.71966	0.997903	0.396031	0.340919	0.700684	0.914178	0.912805
101706_at	Cnga3	-0.0338349	0.08159	5.70342	5.43601	-0.378941	0.852731	0.712333	0.414443	0.978151	0.772046
101707_at	Aldh1a2	-0.0526784	-0.00882205	6.87337	5.7205	-0.73075	-0.156089	0.481028	0.879175	0.950939	0.971156
101708_at	Myo1f	-0.132058	-0.225262	7.20762	6.80856	-1.36339	-2.52584	0.201468	0.0308222	0.86616	0.317581
101709_at	Ahrr	0.0140365	-0.0122549	5.29917	4.83151	0.160185	-0.15654	0.875796	0.878829	0.988109	0.971133
101710_at	Gria4	-0.113061	-0.0846739	4.95269	4.73327	-1.1194	-0.965071	0.288091	0.358038	0.904411	0.739943
101711_at	Mecom	-0.0303434	-0.0947264	4.61497	4.2772	-0.412205	-1.19821	0.688536	0.259396	0.976569	0.680565
101712_at	P2rx7	0.0585448	-0.117389	7.96036	7.33964	0.783528	-1.6098	0.450746	0.139581	0.940698	0.557075
101713_at	Slc7a11	-0.00837329	-0.0496272	3.71209	3.64121	-0.107475	-0.809983	0.916452	0.43744	0.995898	0.782363
101714_at	Tenm1	-0.0581008	-0.0165163	6.21933	6.34242	-0.750858	-0.189315	0.469343	0.853763	0.947609	0.964081
101715_at	NA	-0.097232	-0.143203	5.87979	5.11962	-0.990722	-1.59147	0.344253	0.143649	0.916577	0.56061
101716_at	Rnase2b	-0.0392452	-0.0284355	3.71373	3.32086	-0.512019	-0.409911	0.619306	0.69081	0.966285	0.909239
101717_at	Sstr4	-0.00500022	0.0313254	8.71489	8.35443	-0.0513074	0.292667	0.96005	0.775964	0.998172	0.935984
101718_f_at	Igkv4-70	-0.0566992	-0.12249	7.18142	6.54188	-0.744091	-1.51146	0.473255	0.16266	0.948837	0.589467
101719_at	Pnmt	-0.0133083	-0.0251663	8.26036	7.66154	-0.175858	-0.329343	0.863773	0.748923	0.986536	0.928895
101720_f_at	Adck1	-0.0871046	-0.013287	6.87636	6.40899	-0.72358	-0.200223	0.485239	0.845457	0.95112	0.961748
101723_r_at	Adam28	0.08694	-0.0104118	9.18081	8.84721	1.1009	-0.151243	0.295702	0.882895	0.907567	0.971675
101724_at	Hes2	-0.0321795	0.0702501	6.05578	5.58409	-0.357609	0.803991	0.727768	0.440731	0.979115	0.784443
101725_at	B3galt1	-0.0876808	0.00222843	6.1478	5.84385	-1.00684	0.027159	0.336804	0.978886	0.913255	0.994954
101726_at	Nmbr	-0.0265027	0.0751995	6.49081	5.7629	-0.392122	1.12798	0.702863	0.286554	0.978151	0.697593
101727_at	Nfkbie	-0.0418903	-0.108051	8.31947	8.11547	-0.523632	-1.29372	0.611481	0.225827	0.965979	0.653355
101728_at	C5ar1	-0.121188	-0.0662859	8.07362	7.74748	-1.32227	-0.546231	0.214346	0.597291	0.874296	0.867903
101729_at	Gjd2	-0.0339667	0.0141445	5.93763	5.2438	-0.266542	0.192305	0.795018	0.851484	0.983753	0.963064
101730_at	Cdh6	0.104548	0.100909	5.8944	5.36076	1.21968	1.35643	0.249454	0.205805	0.889115	0.635486
101731_at	NA	0.072739	-0.0712176	3.90502	3.33831	0.912888	-0.94633	0.381922	0.367041	0.925848	0.743235
101732_at	NA	0.157361	-0.0086941	7.35458	7.105	0.66679	-0.0620979	0.519387	0.95175	0.954047	0.98983
101733_at	Ccr1l1	-0.126926	-0.109615	7.28839	7.59573	-1.42353	-1.24373	0.183806	0.242924	0.857604	0.670621
101734_at	Grid2	-0.0760959	-0.0858842	8.25148	7.85073	-0.927935	-1.28705	0.374421	0.228048	0.923019	0.654831
101735_f_at	Ang2	0.00340463	0.239429	6.38653	7.72641	0.0440885	2.91287	0.965667	0.0160266	0.998172	0.243852
101736_at	Npy4r	0.00265036	0.0326968	6.03439	5.93052	0.0305693	0.460681	0.97619	0.65522	0.999391	0.895033
101737_at	Fshb	-0.00513352	-0.078582	5.59079	5.06396	-0.0633478	-1.07742	0.950687	0.307451	0.99698	0.712065
101738_at	Lhb	-0.0607475	-0.0769782	8.65108	8.28275	-0.686424	-1.10226	0.507421	0.297044	0.954047	0.706424
101739_at	NA	-0.0134469	-0.0425328	8.31437	8.09601	-0.1723	-0.572741	0.8665	0.579901	0.987451	0.858542
101740_at	Adra1a	0.00352821	-0.0989185	6.03827	5.33158	0.0494612	-1.39742	0.961486	0.193541	0.998172	0.619568
101741_at	Mir686	-0.0136444	-0.0881926	10.7482	10.2852	-0.161689	-1.03301	0.87464	0.32676	0.988109	0.723124
101742_at	Vmn2r1	0.0584337	-0.124003	3.79304	3.69154	0.711034	-1.32171	0.492661	0.216699	0.953976	0.644078
101743_f_at	Igh-VJ558	0.0146482	-0.0149787	7.05362	6.6581	0.199362	-0.259218	0.845813	0.800905	0.984752	0.945124
101744_i_at	Igh-VJ558	-0.0758528	0.145133	3.73607	4.24969	-1.01928	0.934429	0.331133	0.372843	0.913091	0.744743
101745_f_at	NA	-0.107016	-0.129082	6.17888	5.58584	-1.13559	-1.33629	0.281555	0.212066	0.900138	0.639967
101746_i_at	Igh-VJ558	0.0184932	0.0705439	3.25901	3.07469	0.257191	1.11528	0.802036	0.291698	0.983753	0.7022
101747_f_at	Igh-VJ558	-0.0504769	0.12967	6.35854	6.11244	-0.669096	1.24679	0.517973	0.241846	0.954047	0.669215
101748_at	Bdkrb1	-0.091165	-0.0485173	9.46735	9.11066	-1.41316	-0.69595	0.186754	0.502853	0.859538	0.818394
101749_at	NA	0.0528904	-0.0508662	3.823	3.62334	0.557652	-0.49899	0.588853	0.628948	0.965979	0.882102
101751_f_at	Igkv4-59	-0.0287933	0.0300403	7.03174	6.76909	-0.41371	0.275034	0.687467	0.789081	0.976569	0.940989
101752_f_at	Ighg3	-0.070446	-0.0470874	4.85539	4.28141	-0.599921	-0.440219	0.561368	0.669461	0.962934	0.899917
101753_s_at	NA	-0.261968	0.991868	8.13159	7.82352	-1.62294	1.67165	0.134413	0.126606	0.810287	0.5385
101754_f_at	Sprr2g	-0.0603906	-0.104438	10.4629	9.98717	-0.675319	-1.84693	0.514168	0.0955563	0.954047	0.48253
101755_f_at	Sprr2j-ps	-0.0158858	-0.074626	9.92236	9.50729	-0.208814	-1.03337	0.838616	0.326598	0.984184	0.723124
101756_f_at	Sprr2k	-0.00591155	-0.0680297	7.02853	6.52603	-0.0399911	-0.676046	0.968856	0.514864	0.998611	0.824945
101757_at	Nfe2l1	0.0386331	-0.0588698	7.60891	7.14005	0.376688	-0.469088	0.713957	0.649411	0.978151	0.892123
101758_at	Grem1	-0.0582539	0.087182	7.05299	7.26071	-0.638721	1.27924	0.53678	0.230675	0.956932	0.657495
101759_at	NA	0.0949743	0.0146079	4.48359	4.07113	1.09125	0.182366	0.299736	0.859065	0.908464	0.965732
101760_at	Fut2	-0.0229585	0.0630826	6.55664	6.25152	-0.274062	0.699712	0.78939	0.500603	0.983753	0.817193
101761_f_at	NA	-0.129044	0.0337631	9.02201	8.7065	-1.32797	0.387165	0.212522	0.707023	0.872497	0.913803
101762_at	Sprr3	-0.129414	-0.127891	6.56784	5.93811	-1.37369	-1.82536	0.198347	0.098957	0.864599	0.490458
101763_at	Gpr50	-0.0293854	-0.0719412	9.80734	9.68597	-0.376656	-1.06435	0.71398	0.313039	0.978151	0.716197
101764_at	Htr1d	-0.0721448	-0.0238017	8.05608	7.61715	-0.751993	-0.223392	0.468689	0.827882	0.947058	0.956514
101765_at	Amh	-0.0439784	-0.110526	7.87011	7.6241	-0.517571	-1.48952	0.615559	0.168244	0.965979	0.596332
101768_at	NA	-0.0129066	-0.00890465	4.21735	3.90081	-0.200693	-0.110873	0.844799	0.913986	0.984752	0.980464
101769_at	NA	-0.0403992	-0.00971553	6.71076	6.81834	-0.504455	-0.10801	0.62443	0.916198	0.966715	0.98067
101770_i_at	NA	-0.0910102	0.0326435	5.11601	4.68334	-0.732103	0.20192	0.480236	0.844167	0.950466	0.961097
101771_r_at	NA	-0.0865632	-0.144593	11.8232	11.424	-1.01586	-1.63392	0.332687	0.134385	0.913091	0.547976
101772_r_at	NA	-0.00230248	-0.0495895	8.69832	8.21598	-0.0334685	-0.703848	0.973933	0.498136	0.999391	0.815814
101773_r_at	NA	-0.0299103	-0.0490702	7.5571	7.11746	-0.290548	-0.627674	0.777093	0.544763	0.983753	0.838324
101774_at	Col4a4	-0.0320949	-0.0426388	6.80581	6.38903	-0.290528	-0.395666	0.777108	0.700945	0.983753	0.912833
101775_at	Lmx1b	0.0255315	0.0246096	7.64795	6.86384	0.410147	0.231366	0.689998	0.821856	0.976569	0.953753
101776_at	Erbb3	-0.0598151	-0.0388891	6.97349	6.58261	-0.708929	-0.523101	0.493913	0.612686	0.954047	0.873647
101777_at	Erbb4	-0.0159102	-0.0706939	6.21844	5.14992	-0.203149	-1.20477	0.842928	0.256967	0.984752	0.67901
101778_at	Gja5	-0.10251	-0.0446551	7.98489	7.97503	-0.992959	-0.714651	0.343212	0.491727	0.916228	0.810686
101779_at	Drd3	-0.150767	0.0405328	6.40453	5.89379	-1.62117	0.589588	0.134793	0.568994	0.810838	0.85222
101780_at	NA	0.140118	-0.0741124	4.77658	3.97508	1.38312	-1.02259	0.195523	0.331417	0.863872	0.725855
101781_f_at	NA	0.0972109	0.130529	6.96323	6.4024	1.07253	1.5902	0.307675	0.143933	0.909045	0.56061
101782_at	NA	0.051818	-0.0587765	5.195	5.11509	0.613279	-0.699917	0.552833	0.500481	0.960572	0.817193
101783_i_at	NA	-0.109238	-0.136097	6.14145	5.89965	-0.953081	-1.30156	0.362119	0.223239	0.921249	0.650233
101784_f_at	NA	0.00586365	-0.0390454	6.58383	5.80215	0.0669652	-0.478052	0.947876	0.643243	0.996235	0.888838
101786_at	Kcna4	-0.0395195	-0.13298	4.57039	4.24309	-0.544352	-1.23233	0.597646	0.246966	0.965979	0.672283
101787_f_at	NA	-0.149372	-0.206682	10.5319	9.16733	-1.08417	-0.976233	0.302719	0.352753	0.908464	0.736562
101788_f_at	NA	-0.0386336	-0.0993723	6.96357	6.3419	-0.475028	-1.15378	0.64456	0.276326	0.971884	0.691644
101789_i_at	Ifna4	-0.130485	-0.0813367	6.01106	5.57944	-1.15822	-1.33174	0.272614	0.213502	0.897429	0.640847
101790_f_at	Ifna4	-0.0752855	0.049156	5.5267	5.07012	-0.677972	0.711729	0.512552	0.493455	0.954047	0.812462
101791_f_at	Ifna5	-0.115367	-0.0474603	8.20514	8.21233	-1.12082	-0.630207	0.287512	0.543173	0.904411	0.837911
101792_at	NA	0.07654	-0.00981785	4.522	4.54246	1.1246	-0.0852184	0.285978	0.933827	0.903868	0.985513
101793_at	Fcgr1	0.0532447	0.153652	6.3865	6.42355	0.590887	1.14142	0.567182	0.281192	0.963647	0.694336
101794_f_at	NA	-0.0754465	-0.00515728	5.95646	5.6197	-0.785863	-0.0599239	0.449436	0.953437	0.940698	0.990015
101795_f_at	Defa-rs12	-0.0110515	0.00372318	6.88335	6.75257	-0.110865	0.0363394	0.913828	0.971751	0.995844	0.992679
101796_at	Pcdh7	-0.053932	-0.11616	7.29486	6.87511	-0.65371	-1.54248	0.52745	0.155041	0.954047	0.57658
101797_at	Six6	-0.035041	-0.133083	6.81855	6.27703	-0.351041	-2.03608	0.732546	0.0700764	0.979115	0.43037
101798_at	NA	-0.0879328	0.15034	5.87109	5.42155	-1.21623	2.23193	0.25071	0.05057	0.889115	0.384825
101799_at	NA	-0.0843774	0.140558	5.92546	5.36893	-0.628465	1.28822	0.543218	0.227658	0.958511	0.654616
101800_at	Fpr2	-0.0566585	0.206093	4.15187	3.81864	-0.59647	1.62494	0.563585	0.136299	0.963647	0.550399
101801_at	Fpr-rs3	-0.122731	-0.0472425	4.62049	4.38164	-1.67116	-0.558845	0.124389	0.588982	0.804025	0.86311
101802_at	Fpr-rs4	-0.142026	0.0521246	3.82009	3.71353	-1.70899	0.722776	0.116998	0.486941	0.793511	0.808203
101803_at	Muc5ac	0.119481	-0.0789893	5.02975	4.64494	1.56459	-1.03978	0.147496	0.323756	0.823024	0.722526
101804_at	NA	-0.0668477	-0.342413	6.75667	6.10918	-0.929559	-4.62363	0.373617	0.00103446	0.922918	0.0529437
101805_f_at	Nfil3	0.0150291	0.0481879	8.59905	7.95064	0.187892	0.64031	0.854567	0.536857	0.985795	0.834752
101806_at	NA	-0.0444327	-0.018836	8.35155	8.47642	-0.560477	-0.238814	0.586993	0.816238	0.965979	0.951122
101807_at	Magea4	-0.0252746	-0.0496922	4.81997	4.0822	-0.308043	-0.471745	0.764115	0.64758	0.981527	0.891913
101808_at	Magea7-ps	-0.105326	-0.0798825	6.54219	6.11288	-0.925674	-0.768444	0.375541	0.46059	0.923398	0.794117
101809_at	C1ql1	0.0208319	-0.0884954	6.30549	6.13314	0.229629	-0.981867	0.822822	0.350107	0.983851	0.735947
101810_at	Fshr	0.0163635	-0.0869453	8.43991	8.13917	0.217703	-1.27681	0.831862	0.231496	0.983851	0.657788
101811_at	Atoh7	0.18277	-0.022201	8.17667	7.98628	2.39031	-0.329582	0.0369886	0.748748	0.601293	0.928872
101814_at	Gdf11	0.071242	-0.109065	5.91608	5.86706	0.898504	-1.45708	0.389192	0.176807	0.927171	0.607401
101815_at	Bmp10	0.0839931	-0.0482727	4.50856	4.30352	0.896345	-0.726157	0.390292	0.484958	0.927274	0.80761
101816_at	Serpinb3a	0.0504925	-0.085259	4.54737	4.29501	0.669395	-1.03991	0.51779	0.323699	0.954047	0.722526
101820_at	Ly6g	0.0144761	-0.0331571	5.5442	5.79603	0.190138	-0.432958	0.852852	0.674549	0.985795	0.90245
101821_at	Chrm4	-0.0712449	-0.0688441	6.89049	7.0569	-0.875301	-0.666134	0.401122	0.520909	0.930056	0.827412
101822_at	Mc3r	-0.0693568	-0.0697604	8.32988	7.75787	-0.930205	-0.824201	0.373298	0.429698	0.922918	0.779067
101823_at	Trav19	-0.0968399	-0.0662944	5.939	5.14031	-0.948252	-1.00371	0.364458	0.339987	0.922568	0.730571
101824_at	NA	-0.11075	0.0171717	5.53937	5.04244	-1.24143	0.234122	0.241646	0.819776	0.882877	0.952911
101825_at	Nat3	-0.0464784	-0.135608	5.12415	4.36197	-0.475549	-1.08064	0.644201	0.306089	0.971884	0.711001
101826_at	LOC434035	0.0408483	0.0431655	3.73546	3.34307	0.558993	0.583609	0.587969	0.572851	0.965979	0.854896
101827_at	Hpvc-ps	0.0781354	0.0834955	6.48131	6.08212	0.667238	1.4492	0.519112	0.178944	0.954047	0.609896
101828_at	Ret	-0.0661893	0.00711031	6.00547	6.18956	-0.590704	0.0853699	0.5673	0.93371	0.963647	0.985513
101829_at	Chrm1	-0.0997395	-0.0170784	7.00467	6.79929	-1.33311	-0.23309	0.210887	0.820554	0.871038	0.953039
101830_at	Ryr3	-0.0642213	-0.177622	6.85231	6.45033	-0.721227	-2.01494	0.486625	0.0725671	0.951311	0.434846
101831_at	Shh	0.00764932	-0.144779	7.55746	6.79178	0.0868772	-2.21529	0.932415	0.0519995	0.995898	0.388593
101834_at	Mapk3	0.0551414	0.00696712	7.3662	6.17229	0.511879	0.0858467	0.619401	0.933341	0.966285	0.985513
101835_at	Lrmp	-0.063869	0.0190309	6.33941	6.32727	-0.588016	0.339074	0.569036	0.741807	0.964574	0.926788
101836_at	Ppm1b	0.362548	0.284529	5.4862	5.5609	4.33392	1.88756	0.00134292	0.0894424	0.12472	0.471394
101837_g_at	Ppm1b	0.115711	0.0507838	6.76172	7.41951	0.768743	0.413127	0.459102	0.68853	0.943606	0.908528
101838_r_at	Ppm1b	-0.0180588	-0.0191523	7.28263	7.2499	-0.233114	-0.168736	0.820185	0.869483	0.983851	0.968054
101839_at	1700074P13Rik	-0.0146507	-0.0406634	4.45895	4.07525	-0.211142	-0.689875	0.836846	0.506501	0.984184	0.820068
101840_at	Egfr	-0.0940912	0.0275939	6.92888	7.14696	-1.36526	0.233761	0.200899	0.820048	0.86616	0.953039
101841_at	Egfr	-0.0215918	-0.440046	6.49486	7.4806	-0.210424	-4.109	0.837392	0.00227175	0.984184	0.0888969
101842_g_at	Egfr	-0.0313616	-0.136177	7.0656	7.90296	-0.478645	-0.984303	0.642069	0.348968	0.971852	0.735325
101843_at	Sh2b1	-0.103488	0.0355982	8.58514	8.10195	-1.28814	0.631586	0.225546	0.542308	0.879754	0.837436
101844_at	Pipox	-0.103723	-0.00617419	9.25703	9.78161	-0.711068	-0.0671859	0.492641	0.947803	0.953976	0.98954
101845_s_at	NA	-0.0684103	0.0818535	3.66612	3.5179	-0.574585	0.706782	0.577756	0.49639	0.965979	0.814521
101846_r_at	LOC101055758	0.0647149	0.0136797	5.78441	5.33768	0.623211	0.182259	0.546534	0.859146	0.958511	0.965732
101847_at	Sp100	-0.0482846	-0.0769605	4.83022	4.45915	-0.659773	-0.730366	0.523703	0.482497	0.954047	0.806184
101848_g_at	Sp100	-0.0927636	-0.0555003	4.98244	4.59465	-1.02115	-0.572814	0.330291	0.579853	0.913091	0.858542
101850_at	Spa17	0.0665062	0.133162	5.77444	3.69585	0.462003	1.13097	0.653568	0.285355	0.971884	0.697091
101851_at	Cd200	-0.113095	-0.0807658	5.69438	4.21269	-0.740568	-1.21469	0.4753	0.25333	0.949536	0.67569
101853_f_at	Cfh	0.0858515	-0.00657172	7.38608	9.25302	0.576492	-0.0410803	0.576514	0.968068	0.965979	0.992246
101854_r_at	Bag6	0.141717	0.0281193	8.25174	7.75782	2.0151	0.351705	0.0704022	0.732607	0.725998	0.922841
101855_at	Map6	-0.0521725	-0.0972981	6.9638	6.69877	-0.670648	-1.34304	0.517023	0.209951	0.954047	0.637613
101856_at	Kctd17	0.12095	-0.00102292	8.0462	6.49848	1.70966	-0.0105728	0.116871	0.991779	0.793198	0.99787
101857_at	Srpk2	-0.145058	-0.0223877	5.37873	4.95514	-1.30196	-0.279023	0.220955	0.786107	0.876329	0.939666
101858_at	Rfng	-0.0845861	-0.104329	8.75328	7.8619	-1.14347	-0.808179	0.278415	0.438429	0.899831	0.782363
101859_at	Aqp7	-0.0589519	0.00252519	7.0773	6.3139	-0.569549	0.0390419	0.581045	0.969652	0.965979	0.992517
101860_at	Gmfb	-0.0142692	0.0783469	4.24882	3.73803	-0.223704	1.02098	0.827309	0.332143	0.983851	0.726288
101861_at	Sgce	0.0564606	0.130376	7.49316	7.15277	0.538277	1.18843	0.601685	0.26305	0.965979	0.683259
101862_at	Cyp2b9	-0.0239332	0.0469487	6.24689	11.0239	-0.245856	0.42506	0.810566	0.680102	0.983851	0.904581
101863_at	NA	-0.0352059	-0.291127	5.08388	4.65784	-0.367547	-2.42309	0.720561	0.0366642	0.978573	0.344517
101864_at	Actl7b	-0.0254283	-0.0228375	7.68581	7.18102	-0.302846	-0.248887	0.767963	0.808658	0.983018	0.948642
101865_at	Pip4k2a	0.00700974	-0.000499349	6.48387	4.97386	0.0629093	-0.00701971	0.951028	0.994542	0.99698	0.998594
101866_at	Arfrp1	-0.0244887	0.121531	7.3847	6.75444	-0.269595	1.10483	0.792731	0.29598	0.983753	0.705652
101867_at	Gpam	-0.173004	-0.497131	9.228	10.4234	-1.52947	-2.14345	0.155899	0.0586306	0.835416	0.405563
101868_i_at	H2-DMb2	-0.0809497	-0.0168922	7.49709	7.68245	-0.976297	-0.212062	0.351022	0.836464	0.916955	0.958855
101869_s_at	NA	-0.221708	0.291235	12.8494	11.6991	-1.84941	1.00199	0.0929144	0.340779	0.765336	0.73125
101870_at	NA	-0.0442967	-0.0957844	6.73833	6.36906	-0.489253	-1.1065	0.63479	0.295293	0.969965	0.70509
101871_f_at	Ighm	0.0520881	0.0434216	5.35467	4.99379	0.611096	0.648497	0.554223	0.53177	0.960572	0.833531
101872_at	Gsta2	-0.116438	-0.0623191	12.239	9.24997	-0.548004	-0.300263	0.595225	0.770336	0.965979	0.935116
101873_at	NA	0.0217035	-0.000246688	5.76369	5.22575	0.310612	-0.00321155	0.762215	0.997503	0.981527	0.999263
101874_s_at	Prl7a1	0.0180837	-0.0115289	3.80523	3.49983	0.274659	-0.164048	0.788943	0.873074	0.983753	0.969064
101875_at	Ppp2r5d	-0.00645256	-0.0162949	8.10483	7.60864	-0.0823384	-0.248004	0.935937	0.809321	0.995898	0.948995
101876_s_at	NA	0.0962641	0.101558	8.9297	9.53407	0.856305	0.688114	0.411074	0.507561	0.932663	0.820827
101877_at	Slc31a1	0.12331	-0.0954936	9.72013	9.45916	0.751785	-1.18918	0.468809	0.262768	0.947058	0.683259
101878_at	Cd72	-0.191297	0.118829	5.42726	4.2638	-1.24029	0.700544	0.24205	0.500106	0.884095	0.816814
101879_s_at	Cr1l	0.102687	0.183602	8.01053	7.47717	0.842507	1.56877	0.418408	0.148831	0.935778	0.568033
101880_at	Col18a1	-0.0234532	-0.0226662	6.54403	6.16022	-0.324402	-0.355509	0.752048	0.729845	0.979894	0.922106
101881_g_at	Col18a1	0.0910042	0.109777	8.43432	10.0663	0.678041	0.914497	0.51251	0.382707	0.954047	0.750491
101882_s_at	Col18a1	0.0564168	0.0382055	9.09029	10.0564	0.435046	0.413062	0.672395	0.688577	0.974762	0.908528
101883_s_at	NA	0.408951	0.489129	4.96179	4.89916	2.06381	0.985189	0.0648265	0.348554	0.706735	0.735259
101884_at	Xlr4a	0.0428962	0.104934	3.79626	3.60253	0.550306	0.728423	0.593701	0.483632	0.965979	0.806656
101885_at	Gas5	0.0864831	-0.0404937	4.48835	3.89945	1.14829	-0.59064	0.276508	0.568317	0.899198	0.851691
101886_f_at	NA	0.0999795	0.111766	10.4043	11.8601	0.958239	0.770052	0.359632	0.459679	0.920062	0.794066
101887_at	Agt	0.184313	0.258342	9.7197	12.1628	2.06742	2.66423	0.0644312	0.0243905	0.706735	0.290506
101888_at	Rora	-0.0780271	0.013163	5.76511	5.37516	-0.794033	0.135241	0.44487	0.895197	0.940698	0.97476
101889_s_at	Rora	0.251862	0.497048	7.11215	7.1523	1.73426	3.0679	0.112285	0.0123501	0.785452	0.210983
101890_f_at	Dnajc2	-0.0461627	0.128648	7.86748	7.076	-0.286865	1.06337	0.779835	0.313462	0.983753	0.716197
101891_at	Hsd17b2	-0.0569643	-0.0638998	6.41236	9.17162	-0.565931	-0.476258	0.583413	0.644475	0.965979	0.890047
101892_f_at	Aktip	-0.0990808	-0.0532509	7.45582	4.4554	-0.522633	-0.414548	0.612153	0.687524	0.965979	0.908392
101893_r_at	Aktip	0.0173385	-0.0531615	3.17908	2.97949	0.258325	-0.874209	0.801184	0.403207	0.983753	0.764432
101894_s_at	Aktip	-0.0702824	-0.202619	6.89318	3.86086	-0.557396	-2.62358	0.589021	0.0261263	0.965979	0.298865
101896_at	Cd1d2	0.113194	-0.0906545	6.10503	5.82872	1.07817	-1.0414	0.305264	0.323044	0.909045	0.722014
101897_g_at	NA	-0.134794	0.119136	8.36792	10.4712	-1.43314	0.555701	0.181111	0.591047	0.857604	0.864184
101898_s_at	H2-Q10	0.115859	-0.0777913	7.47393	13.0428	0.749875	-0.992138	0.46991	0.345322	0.947609	0.73265
101899_at	F2	0.286065	0.0555233	5.31998	11.389	1.60541	0.710448	0.138232	0.494214	0.814796	0.813052
101900_at	Cdkn2b	0.0954913	-0.213029	6.23528	5.00178	0.592242	-2.89469	0.566308	0.0165253	0.963647	0.246852
101901_at	Mpdu1	0.222911	0.369526	7.30622	6.99929	2.22208	2.20779	0.0494633	0.0526563	0.661742	0.390755
101902_at	Rbpj	-0.147322	0.195197	6.21219	5.40389	-1.56296	2.38172	0.147877	0.0393137	0.823599	0.353201
101903_at	Smyd1	-0.122954	-0.116472	5.9293	5.60285	-1.49612	-1.62465	0.164259	0.136361	0.840449	0.550399
101904_at	Smyd1	-0.118366	-0.232136	6.80077	6.56914	-1.12359	-1.93027	0.286386	0.0834121	0.904212	0.45989
101905_at	Itch	-0.096482	0.030254	9.3227	9.01385	-1.27218	0.346591	0.230945	0.736327	0.879754	0.924741
101906_at	Smc4	-0.226897	-0.0183054	6.39648	5.07913	-1.12206	-0.175847	0.287007	0.864044	0.904411	0.966602
101907_s_at	Ceacam2	0.229764	0.0443224	7.1015	6.21362	0.907863	0.448638	0.384451	0.663585	0.925848	0.8986
101908_s_at	NA	0.149933	0.22696	7.54946	7.3253	0.55304	1.63371	0.591894	0.134429	0.965979	0.547976
101909_f_at	Mup3	0.150702	-0.278329	6.71652	13.0436	0.7319	-1.45697	0.480355	0.176837	0.950511	0.607401
101910_f_at	Mup3	0.185994	-0.336828	6.3447	13.1006	0.955618	-1.74035	0.360894	0.113477	0.92104	0.515167
101912_at	Wfdc21	0.503894	0.00956798	4.95364	12.1915	1.37986	0.0798154	0.196494	0.938013	0.863872	0.986125
101913_at	Clcn5	-0.277418	0.0379165	8.78282	6.08081	-1.40234	0.382856	0.189875	0.710112	0.859798	0.914598
101914_at	Angel2	-0.0638412	-0.168186	8.29352	6.86001	-0.78152	-1.94828	0.451876	0.0809844	0.940817	0.458031
101916_at	Llgl2	-0.0430305	-0.0376674	9.91036	8.81902	-0.462625	-0.633902	0.653137	0.540857	0.971884	0.836851
101917_at	Il2ra	0.0305091	-0.118078	4.79026	4.10754	0.326765	-1.56369	0.75031	0.150014	0.979894	0.569572
101918_at	Tgfb1	-0.0639235	0.106626	7.69453	7.26687	-0.599362	0.996233	0.561727	0.343427	0.962934	0.73125
101919_at	Zfx	-0.101509	-0.0128634	6.47426	6.192	-1.00812	-0.115215	0.336217	0.910633	0.913255	0.980006
101920_at	Pole2	0.0200303	-0.127689	5.19238	4.29406	0.235081	-2.05856	0.818698	0.0675157	0.983851	0.427129
101921_at	Rab4a	0.17596	-0.0170056	8.42704	7.94163	1.56177	-0.132274	0.148156	0.897481	0.82413	0.975282
101922_at	Kdelr2	0.15315	0.0119799	8.17629	8.39796	1.62998	0.153049	0.132906	0.881508	0.810287	0.971259
101923_at	Pla2g7	-0.0458071	0.193452	6.27139	4.7888	-0.394718	1.54869	0.701004	0.153555	0.978151	0.573761
101924_at	Rad51d	-0.142358	-0.223027	5.99665	5.60138	-1.79398	-3.13147	0.101821	0.0111033	0.772976	0.19865
101926_at	Pim2	-0.0544734	0.0646648	7.59605	7.0267	-0.602645	0.745566	0.559622	0.473674	0.962761	0.801334
101927_at	Prkar1b	-0.0182414	-0.0637286	9.55138	9.15116	-0.270356	-0.984696	0.792162	0.348784	0.983753	0.735259
101928_at	Serpinf2	0.132597	0.260723	8.22926	11.3789	1.25006	1.64915	0.238601	0.131193	0.880551	0.544299
101929_at	Dynll2	-0.146059	0.0370857	7.30376	7.14582	-0.823937	0.178145	0.428418	0.862288	0.937814	0.966369
101930_at	Nfix	0.0446269	-0.133743	8.3529	9.1941	0.27244	-0.748708	0.790602	0.471863	0.983753	0.800592
101931_at	Ptdss1	-0.0705107	0.0581232	9.18025	8.57869	-0.568187	0.583707	0.581935	0.572788	0.965979	0.854896
101932_at	Ptpre	-0.0171035	0.0466657	6.85096	6.27383	-0.198421	0.505805	0.846531	0.62433	0.984752	0.879783
101933_at	Rab10	-0.128689	-0.0765523	7.27903	6.86806	-1.64717	-0.678134	0.12929	0.513596	0.808703	0.824295
101934_at	Fez2	-0.0293244	-0.0478889	8.15942	7.24834	-0.356085	-0.616587	0.728876	0.551755	0.979115	0.842543
101936_at	Clk4	0.052822	0.375032	6.22794	5.79744	0.432592	3.2967	0.674121	0.00843199	0.975258	0.17727
101937_s_at	Clk4	0.131853	0.330743	5.92255	5.05873	1.09481	2.63651	0.298243	0.0255611	0.907963	0.295836
101938_at	Pabpc2	-0.0895944	-0.0662862	6.95546	6.62734	-1.16929	-0.779662	0.268321	0.45426	0.895934	0.790696
101939_at	Rnf141	0.0236296	-0.140836	9.70116	10.0593	0.294195	-1.80908	0.774382	0.101598	0.983753	0.493874
101940_at	Smpd2	0.149146	0.297074	8.58062	7.82219	1.3933	2.86128	0.192513	0.017483	0.86094	0.253207
101942_at	Sugp2	-0.184152	-0.122986	8.51931	8.17603	-2.01931	-1.40304	0.0699031	0.191908	0.723839	0.617826
101943_at	Tceb3	0.180118	0.194018	8.19549	7.81134	2.02036	1.72159	0.0697796	0.116932	0.72316	0.522825
101944_at	Lypla1	0.0229668	-0.0407741	10.017	9.42847	0.165099	-0.326419	0.872023	0.751066	0.988109	0.929574
101945_g_at	Lypla1	0.0936565	0.0279527	5.79877	4.94693	0.424152	0.245715	0.680073	0.811042	0.975502	0.949241
101946_at	Lypla1	0.0277923	0.101459	8.07121	7.22505	0.0991997	0.393755	0.922861	0.70231	0.995898	0.912973
101947_at	Akap8l	0.175566	0.0242244	7.94909	7.35466	1.52877	0.37913	0.15607	0.712788	0.835416	0.915677
101948_at	Lamb1	-0.138821	0.0848041	6.55294	4.26448	-1.27697	1.15066	0.229314	0.277547	0.879754	0.69314
101949_at	Pmm2	0.0065454	0.147958	7.86125	7.62403	0.0854256	2.16085	0.933541	0.0569533	0.995898	0.401147
101950_at	Gipc2	0.0380117	-0.0478809	9.03946	4.40069	0.292592	-0.643144	0.775574	0.535092	0.983753	0.83426
101952_at	Setd4	0.0106438	-0.0630241	6.76787	7.18797	0.0969024	-0.684066	0.924641	0.510004	0.995898	0.822334
101953_at	S1pr1	-0.0195623	-0.20085	4.62316	3.97276	-0.198583	-1.96871	0.846407	0.0783121	0.984752	0.452231
101954_at	H2afz	0.213095	-0.0965862	8.99802	8.37205	1.83317	-1.12659	0.0954466	0.287114	0.768496	0.697971
101955_at	Hspa5	-0.289531	0.10587	9.98978	10.4854	-1.25509	0.446214	0.236845	0.665274	0.880336	0.89877
101956_at	Ckap4	0.0230858	-0.0658973	7.1284	6.76772	0.267925	-0.985999	0.793982	0.348176	0.983753	0.735212
101957_f_at	Parp1	-0.112042	-0.0627844	7.11073	6.76766	-1.23739	-0.456928	0.243081	0.657821	0.885121	0.896389
101958_f_at	Tfdp1	-0.0278024	-0.0747775	5.47616	4.58823	-0.209939	-0.562198	0.83776	0.586783	0.984184	0.862139
101959_r_at	Tfdp1	-0.0349767	-0.0993959	6.95408	6.09525	-0.395387	-0.733314	0.700525	0.480778	0.978151	0.805035
101960_at	Rtcb	0.231984	0.344252	7.73492	7.01983	1.68384	2.46489	0.121867	0.034166	0.799555	0.334945
101961_at	Bub3	0.135137	0.041026	8.93005	8.46048	1.50067	0.444556	0.163098	0.666431	0.840449	0.89877
101962_at	Ddx17	-0.197544	-0.156216	8.89235	8.30851	-1.83193	-1.222	0.0956421	0.250678	0.768583	0.674745
101963_at	Ctsl	0.332694	0.337007	10.5328	11.3352	2.35181	3.01874	0.0395414	0.0134121	0.621952	0.222702
101964_at	Tkt	-0.214588	-0.231987	10.3509	9.72606	-1.35979	-1.55144	0.20257	0.152899	0.86616	0.573261
101965_at	Rnf13	-0.0232743	-0.0575924	9.30189	9.21145	-0.177367	-0.563303	0.862618	0.58606	0.986536	0.861736
101966_s_at	Rnf13	0.0378783	0.111435	7.99181	7.90645	0.17489	0.545034	0.864515	0.598082	0.986536	0.867978
101967_at	Sdf2	-0.0812565	-0.223622	8.97123	8.53755	-0.933908	-2.37464	0.371472	0.0397857	0.922918	0.354994
101968_at	Odf1	-0.0505893	-0.0392126	7.26685	6.88292	-0.546498	-0.458561	0.596223	0.656689	0.965979	0.896045
101969_at	Nbl1	-0.000580064	-0.097377	8.8189	8.02073	-0.00695201	-1.36605	0.994584	0.202869	0.999683	0.631616
101970_at	Lrig1	-0.0310252	-0.0778877	7.265	7.01275	-0.411981	-1.14812	0.688695	0.278544	0.976569	0.693612
101971_at	NA	0.0975758	-0.257588	11.0664	9.37395	0.993985	-1.876	0.342735	0.0911445	0.915864	0.47489
101972_at	Napsa	0.0686816	0.00682964	13.8651	7.26764	0.952828	0.0840386	0.362241	0.934741	0.921317	0.985513
101973_at	Cited2	0.0170309	0.0551122	9.30255	7.45579	0.101049	0.287095	0.921428	0.780101	0.995898	0.937859
101975_at	Dlk1	-0.116973	-0.143421	8.14168	7.7356	-1.19468	-2.12684	0.258676	0.0602758	0.892401	0.40873
101976_at	Cops4	0.18385	0.14559	8.7428	8.23892	2.00619	1.27497	0.0714698	0.232118	0.729775	0.658046
101977_at	Nudt3	0.00401098	-0.0538162	9.54549	8.2842	0.0380011	-0.760011	0.970405	0.465385	0.998611	0.797434
101978_at	Phospho2	-0.134021	-0.0823967	6.57373	6.21798	-1.82626	-1.01609	0.096544	0.334349	0.769886	0.72678
101979_at	Gadd45g	2.0567	2.45404	8.89382	8.2858	18.9049	10.6016	2.08613e-09	1.23314e-06	2.60516e-05	0.00102592
101980_at	Sub1	0.013963	0.277483	6.19047	5.76218	0.0772144	2.14884	0.939914	0.0581056	0.995898	0.404884
101981_at	Nr1h2	0.124978	0.0391501	7.49481	6.7656	1.13877	0.406076	0.280283	0.693533	0.900049	0.909384
101982_at	Vasp	-0.178793	0.126037	8.17931	6.76784	-2.30452	0.964058	0.0429122	0.358521	0.633321	0.740449
101984_at	Atox1	0.0140712	-0.184037	11.3015	10.8518	0.159548	-1.65959	0.876285	0.129046	0.988109	0.541053
101985_at	Plg	0.497941	-0.00793916	5.68674	12.1649	2.17755	-0.122784	0.0533926	0.904794	0.676119	0.97802
101989_at	Uqcrc1	0.132293	-0.197391	10.9289	10.5513	0.98441	-1.57228	0.347203	0.148019	0.916955	0.566487
101990_at	Ldhb	0.0860576	-0.0739495	10.4303	6.07956	0.743522	-0.790415	0.473585	0.448248	0.948837	0.7883
101991_at	Fmo1	-0.0799944	-0.102667	11.2399	10.4984	-0.708388	-1.01254	0.494235	0.335961	0.954047	0.728256
101992_at	Psmb6	0.191731	0.0634974	9.82794	9.63364	1.95371	0.443056	0.0780728	0.667478	0.746981	0.898986
101993_at	Tnc	-0.0835309	0.00896894	6.07771	5.59079	-0.897598	0.138645	0.389653	0.892577	0.927209	0.974004
101995_at	Sqstm1	0.365979	0.279284	10.0798	10.1927	3.88131	3.56851	0.00282294	0.00539118	0.188901	0.142856
101996_at	Ptpn2	-0.0325145	0.186476	6.02072	5.35551	-0.377354	1.69475	0.713477	0.122045	0.978151	0.532504
101997_at	Atg12	0.0528918	0.177222	8.91399	8.14469	0.757334	1.85179	0.465618	0.0948058	0.945453	0.482472
101998_at	4833420G17Rik	-0.0458345	0.482454	6.76152	6.31567	-0.526534	5.70821	0.609534	0.000223097	0.965979	0.0193475
102000_f_at	Uqcrc2	0.0262057	-0.0338579	10.6254	9.77585	0.168264	-0.128462	0.869594	0.900417	0.988109	0.976416
102001_at	Rrm2	-0.058787	0.639677	5.67138	5.1744	-0.362255	6.38267	0.724395	9.33223e-05	0.979115	0.01132
102002_at	Ubqln2	-0.014354	0.063065	6.93658	5.2262	-0.102638	0.520998	0.920198	0.614096	0.995898	0.87414
102003_at	Gbf1	-0.0125916	0.0461253	8.07813	7.47996	-0.163543	0.461891	0.873217	0.654382	0.988109	0.89428
102004_at	NA	0.000831483	-0.131241	8.42821	9.62808	0.00956199	-0.852564	0.992551	0.414531	0.999683	0.772046
102007_at	Hccs	-0.120361	0.0296169	5.226	4.68292	-1.38301	0.343204	0.195555	0.738794	0.863872	0.925393
102009_at	Cyfip2	0.0484939	-0.248454	9.44365	6.37758	0.454842	-3.27066	0.658545	0.00880443	0.974282	0.180838
102010_at	Abcf2	0.0434861	-0.00911293	4.77908	4.08368	0.567097	-0.115919	0.582649	0.91009	0.965979	0.979759
102011_at	Cep89	0.0319036	0.0319374	6.91577	5.9781	0.338585	0.439094	0.741641	0.670248	0.979115	0.900103
102012_at	Skap2	-0.0170691	0.0631398	9.08172	7.78054	-0.210175	0.487805	0.837581	0.636565	0.984184	0.884941
102013_at	Rdh16	0.0122162	-0.483626	7.635	7.37494	0.0665611	-2.14231	0.94819	0.0587421	0.996331	0.405563
102014_at	Homer3	-0.038285	-0.0383892	7.46792	7.05811	-0.465931	-0.390524	0.650845	0.704619	0.971884	0.913538
102015_at	Ddx49	-0.0203131	-0.0153344	7.35329	6.76274	-0.252544	-0.217741	0.805529	0.832159	0.983753	0.958017
102016_at	Cidec	-0.231364	-0.0064295	4.97034	4.1714	-0.988927	-0.0839999	0.34509	0.934771	0.916577	0.985513
102017_at	Prpf4b	-0.0744581	0.0781925	4.56677	4.05828	-0.734359	0.828399	0.478918	0.42743	0.950182	0.778551
102018_at	Cnot3	-0.0914213	-0.0789508	7.2299	6.53452	-1.03031	-1.31894	0.326171	0.217589	0.913091	0.644662
102019_at	Mrpl13	0.17388	0.263645	8.07172	7.66709	1.25238	1.01891	0.237789	0.333074	0.880336	0.726378
102020_at	Kcnk3	-0.136651	-0.347256	5.57389	5.03314	-0.950207	-3.58281	0.36351	0.00526697	0.922068	0.141754
102021_at	Il4ra	0.0382639	-0.00702948	7.72789	7.69375	0.407621	-0.101797	0.691794	0.920999	0.976585	0.982201
102022_at	Mcee	0.0908074	-0.146135	8.55746	8.0186	0.684494	-0.855404	0.50859	0.413033	0.954047	0.770995
102024_at	Ncoa3	-0.100966	-0.0690156	6.73998	5.04371	-1.44338	-0.576011	0.178273	0.577775	0.855057	0.857955
102025_at	Cxcl13	0.0268615	0.244839	4.72974	4.59668	0.250659	1.29974	0.806947	0.223836	0.983753	0.651231
102026_s_at	NA	0.0616968	0.588259	6.14236	6.41718	0.531466	5.59832	0.606231	0.000258641	0.965979	0.0215785
102027_s_at	NA	0.221684	0.464515	9.74869	9.60888	2.61017	7.11029	0.0252232	3.88939e-05	0.533621	0.00684095
102028_at	Rassf5	-0.0404698	-0.16217	6.26034	6.68425	-0.473179	-2.07991	0.645835	0.0651676	0.971884	0.421446
102029_at	Il16	-0.188656	0.0677149	6.53469	6.08088	-2.30903	0.753732	0.0425788	0.468977	0.633321	0.798953
102030_at	Atrx	0.0759016	-0.140854	4.79536	4.42096	0.764255	-1.74123	0.461658	0.113317	0.943606	0.515046
102031_at	Rnaseh1	0.10041	0.0806103	6.12786	5.6166	1.26635	1.00118	0.232945	0.34115	0.879887	0.73125
102032_at	Twsg1	-0.0397817	-0.113021	8.21658	6.91292	-0.618414	-1.03574	0.549571	0.325548	0.95981	0.722898
102033_at	Tesk1	-0.00352328	-0.0259469	7.76701	7.10165	-0.0489777	-0.402973	0.961862	0.695739	0.998172	0.910546
102035_at	Tpmt	-0.19233	0.0247072	8.98035	7.51929	-1.20207	0.163297	0.255921	0.873649	0.892401	0.969121
102036_at	Thap7	0.00772755	0.152187	7.82212	7.44744	0.0765784	1.85319	0.940408	0.0945895	0.995898	0.482472
102037_at	Mapre2	-0.249846	-0.0394018	6.95451	5.90429	-3.24102	-0.545976	0.00839847	0.59746	0.33256	0.867903
102038_at	Lnx1	0.00202422	0.089755	4.15073	3.36017	0.0275127	1.35254	0.97857	0.207001	0.999391	0.635923
102039_at	Gtf2h4	-0.140948	-0.104111	7.93265	7.94156	-1.03875	-0.706728	0.322406	0.496422	0.913091	0.814521
102040_at	Grk6	0.012008	0.0298015	8.0615	7.4001	0.153814	0.366804	0.880692	0.721669	0.988645	0.918862
102041_at	Myom2	-0.137089	0.0799925	5.66923	4.58322	-1.06591	0.664584	0.310522	0.521858	0.91013	0.827944
102042_at	Fam3a	0.0560862	0.0166644	7.25366	6.79455	0.457082	0.232404	0.656986	0.821072	0.973244	0.953109
102043_at	Tuft1	0.0921451	-0.0298767	7.61007	6.36533	0.944004	-0.49169	0.366525	0.633914	0.922568	0.883664
102044_at	Wisp1	-0.0763552	-0.186385	4.88737	4.17175	-0.652996	-1.9472	0.527893	0.0811278	0.954047	0.45822
102046_at	Srsf10	-0.419503	-0.23853	6.40395	5.66656	-2.53008	-2.71651	0.0290059	0.0223266	0.55742	0.281824
102047_at	Nmt1	0.235088	0.509677	7.91262	7.87505	1.78103	5.19121	0.104013	0.000453905	0.774029	0.0313248
102048_at	Ankrd1	-0.435003	-0.099069	4.99255	3.53563	-3.66834	-0.987669	0.00403868	0.347398	0.233496	0.734311
102049_at	Pdk4	1.34069	0.958485	9.04783	7.54074	4.07641	6.75647	0.00204284	5.90494e-05	0.161262	0.00878217
102050_at	Nfatc3	-0.0998927	0.024919	6.53815	6.1822	-1.27725	0.408598	0.22922	0.691742	0.879754	0.909239
102052_at	Abhd5	-0.0532475	0.117454	7.43561	6.60289	-0.683541	0.656894	0.509168	0.526582	0.954047	0.830617
102053_at	Plscr2	-0.243792	-0.176949	8.1748	5.04086	-1.84033	-1.40807	0.0943226	0.190457	0.767729	0.616589
102054_at	Ankfy1	-0.164372	-0.0827766	8.38525	7.52778	-1.55414	-1.00337	0.149952	0.340146	0.82794	0.730606
102056_f_at	2610002J02Rik	0.0321429	-0.292889	8.51795	7.15814	0.23672	-2.64669	0.817459	0.0251248	0.983851	0.292907
102057_r_at	2610002J02Rik	-0.0177156	-0.158785	6.74262	6.15953	-0.197867	-2.00799	0.846953	0.0734044	0.984752	0.4386
102058_at	Mrpl9	0.1362	-0.00432053	7.57332	7.11819	1.48518	-0.0522062	0.167086	0.959428	0.841654	0.991459
102059_at	Nicn1	0.00537674	-0.0134441	7.8736	7.36505	0.0434566	-0.202395	0.966158	0.843806	0.99824	0.961097
102060_at	Golga4	0.0118783	0.190134	8.25094	6.99496	0.110986	1.83588	0.913735	0.097285	0.995844	0.486932
102061_at	Mlf1	0.0469414	0.0873763	3.55273	3.28829	0.571764	0.941606	0.579597	0.369336	0.965979	0.74367
102062_at	Smarcc1	0.0709434	-7.83809e-05	8.17355	7.26946	0.754396	-0.000607365	0.467306	0.999528	0.946434	0.999688
102063_at	Pdpk1	-0.0167013	-0.0800244	6.08802	5.2374	-0.158666	-0.907048	0.876963	0.38644	0.988109	0.753729
102064_at	Casp1	-0.0743802	-0.0374411	5.10343	5.01828	-0.921395	-0.356338	0.377668	0.729244	0.924768	0.922021
102065_at	Fcna	0.0249107	0.428511	6.3524	6.98387	0.351246	1.68177	0.732397	0.124589	0.979115	0.535391
102069_at	Mtf2	-0.0757294	0.190084	7.06643	5.90643	-0.543859	1.80491	0.597973	0.102285	0.965979	0.494421
102070_at	Col9a3	-0.0559809	0.0340791	7.65562	7.29127	-0.650815	0.41948	0.529245	0.684038	0.954047	0.906245
102071_at	Dda1	0.00275243	0.0555325	9.53254	9.29215	0.0406091	0.690226	0.968375	0.50629	0.998611	0.820045
102072_g_at	Dda1	0.0462402	0.0116856	9.25924	8.66583	0.538044	0.155741	0.601841	0.879442	0.965979	0.971156
102073_at	Park2	0.0502463	-0.0352921	5.99726	5.50646	0.471593	-0.551714	0.64693	0.593672	0.971884	0.865892
102074_at	Otp	0.0244588	-0.168462	7.32521	6.83046	0.286165	-2.44976	0.780356	0.0350505	0.983753	0.337326
102075_at	Mcpt-ps1	-0.120576	-0.102509	5.86585	5.03964	-1.42586	-1.08528	0.18315	0.304127	0.857604	0.710361
102076_at	Igkv4-68	-0.105891	-0.0357431	7.35062	6.81356	-1.01364	-0.39373	0.333698	0.702328	0.913091	0.912973
102077_at	NA	-0.0264769	-0.0676196	6.07485	5.26422	-0.332804	-1.05671	0.745877	0.316343	0.979204	0.719376
102078_at	Pth	0.0478848	0.0338317	4.08596	3.8742	0.452565	0.387911	0.660132	0.706489	0.974465	0.913661
102079_at	Aym1	-0.0363028	-0.187151	7.03081	6.43942	-0.384613	-1.94459	0.708252	0.0814757	0.978151	0.458284
102080_at	NA	-0.0702176	-0.0250681	7.20111	6.89878	-0.977297	-0.364576	0.35055	0.723279	0.916955	0.919506
102081_at	Robo3	-0.0800007	-0.0310794	6.19114	5.62521	-1.07268	-0.439889	0.307609	0.669692	0.909045	0.89994
102082_at	Gnas	-0.187	-0.215521	6.06092	5.77721	-2.44601	-1.93836	0.033578	0.0823126	0.583488	0.458321
102083_at	Rit2	-0.0792471	-0.0793989	6.18181	6.37269	-1.06181	-0.91044	0.312294	0.384737	0.910437	0.752011
102084_f_at	Cyp2c38	-0.0239712	-0.15055	8.30527	11.4868	-0.275311	-0.873747	0.788456	0.403446	0.983753	0.764432
102085_at	Insm1	0.0318234	-0.086052	5.61455	4.89429	0.343934	-1.05244	0.73773	0.3182	0.979115	0.719587
102086_r_at	D15Ertd50e	-0.0442118	-0.170594	3.50317	3.27798	-0.562637	-2.3237	0.585574	0.0433487	0.965979	0.364632
102087_at	Hoxa3	-0.058613	-0.00766228	6.46073	6.18737	-0.685665	-0.122792	0.507881	0.904788	0.954047	0.97802
102088_at	Klf12	0.120549	-0.0552994	6.05668	5.44207	1.68086	-0.853807	0.122456	0.413875	0.799555	0.771489
102089_at	Matn3	-0.0352881	-0.0779794	4.41909	3.88555	-0.417312	-0.96317	0.684912	0.358944	0.975946	0.740552
102090_f_at	Smyd5	-0.0161778	-0.0359462	6.43137	6.06977	-0.209934	-0.512011	0.837764	0.620139	0.984184	0.877689
102091_f_at	NA	0.176937	0.09824	6.14393	5.36037	1.12668	0.948974	0.285137	0.365761	0.902607	0.742752
102092_s_at	Ovgp1	0.224738	0.0539826	6.05577	5.67276	1.89578	0.442906	0.0860192	0.667583	0.752764	0.898986
102093_f_at	NA	0.201034	0.184915	7.76566	7.2777	2.16488	2.20931	0.0545643	0.052522	0.676663	0.390755
102094_f_at	NA	0.0498597	-0.106762	11.0243	12.1132	0.433771	-1.31016	0.673292	0.220429	0.974762	0.646962
102095_f_at	Spock2	-0.126885	-0.266846	4.78717	4.35556	-1.34012	-2.96386	0.208675	0.0147081	0.868176	0.23398
102096_f_at	NA	0.0560515	-0.774372	6.30636	10.3002	0.861464	-3.096	0.408355	0.0117821	0.932663	0.204643
102097_f_at	Ndufa3	-0.104206	-0.111476	7.72925	7.14581	-0.713836	-1.251	0.490997	0.240373	0.953589	0.667655
102098_at	NA	0.0881261	0.19057	11.2645	11.4421	0.895698	1.81533	0.390621	0.100576	0.927274	0.491805
102099_f_at	Kctd17	0.0148676	-0.020751	8.54255	5.69	0.207597	-0.247579	0.839542	0.809641	0.984184	0.949127
102100_f_at	Nt5c3b	-0.0200998	0.178813	4.42766	3.70791	-0.250723	1.37033	0.806899	0.201573	0.983753	0.630571
102101_f_at	Plp1	0.0761223	-0.238561	6.90072	6.34862	0.568311	-1.3355	0.581855	0.212315	0.965979	0.639967
102102_at	NA	-0.200105	-0.143646	4.22142	3.56608	-1.61457	-1.1977	0.136225	0.259583	0.812805	0.680565
102103_f_at	Glrx3	0.0830087	-0.132784	10.1798	9.86177	0.558684	-0.973336	0.588173	0.35412	0.965979	0.737116
102104_f_at	Ms4a6c	0.150085	0.300557	4.7162	4.28004	0.772969	2.0446	0.456704	0.0690947	0.943376	0.427846
102105_f_at	Ptgds	0.0201892	0.00667692	9.66716	9.36015	0.249218	0.0925962	0.808033	0.928116	0.983844	0.984787
102106_at	C76472	-0.16195	0.0545097	4.95247	4.97682	-1.8619	0.663707	0.0910088	0.522396	0.762252	0.828358
102107_at	Eef1b2	-0.0560697	-0.0300476	5.2476	4.88452	-0.859999	-0.517432	0.409126	0.616491	0.932663	0.875354
102108_f_at	Myh9	0.114689	0.257076	7.64615	7.1906	0.488476	1.35692	0.635322	0.205654	0.969965	0.635428
102109_at	NA	0.175873	0.0299309	12.2487	11.5758	1.27671	0.206235	0.229401	0.840887	0.879754	0.960346
102110_at	NA	-0.0442229	-0.0523346	7.05273	6.65872	-0.473388	-0.546536	0.645691	0.597089	0.971884	0.867837
102111_f_at	Rpp30	-0.27736	-0.078225	6.49278	6.17928	-2.3536	-0.674061	0.039419	0.516071	0.621952	0.825428
102112_s_at	NA	-0.10855	0.0629801	9.49032	8.73805	-1.51426	0.84107	0.159664	0.420633	0.84024	0.774302
102113_f_at	NA	0.125938	-0.0459211	9.42676	8.97827	1.66148	-0.685686	0.126346	0.509025	0.805193	0.822097
102114_f_at	Angptl4	0.496661	1.05701	8.39691	8.73019	3.26278	5.06329	0.00808816	0.000544302	0.330561	0.0355396
102115_r_at	Nusap1	-0.0123165	0.0595356	5.65822	5.64787	-0.160622	0.938503	0.87546	0.37085	0.988109	0.743963
102116_f_at	Syt3	-0.250168	-0.125393	5.77147	5.2509	-3.47947	-1.50007	0.0055706	0.165538	0.271741	0.592493
102117_at	Ift27	-0.0213907	-0.0836043	8.20347	7.62775	-0.248078	-1.27687	0.808891	0.231475	0.983851	0.657788
102118_at	Ankrd17	-0.109393	-0.0831796	5.34225	5.0243	-1.01592	-0.975757	0.33266	0.352977	0.913091	0.736562
102119_at	NA	-0.0210512	0.0681263	5.7852	5.70891	-0.285631	0.905554	0.780754	0.387193	0.983753	0.753976
102120_f_at	Gm9229	-0.0247143	0.0161859	6.98	6.66963	-0.365482	0.215039	0.722056	0.834207	0.978648	0.958379
102121_f_at	Krt19	0.0622578	-0.0341466	5.6164	5.13229	0.643783	-0.423471	0.533619	0.681221	0.955636	0.905256
102122_f_at	NA	-0.110994	-0.26635	5.96299	5.23604	-1.62222	-2.67045	0.134567	0.0241352	0.810287	0.290087
102123_at	Lipa	-0.70697	-0.572236	8.66899	9.00249	-3.7831	-1.98845	0.00332774	0.0758076	0.206892	0.445907
102124_f_at	Cox4i1	0.0433718	-0.0997669	7.50122	6.75835	0.593549	-0.968309	0.565465	0.356499	0.963647	0.73867
102125_f_at	NA	0.0492971	-0.0166672	5.77554	4.86711	0.527482	-0.136735	0.608898	0.894047	0.965979	0.974617
102126_at	NA	0.12852	0.261104	12.1445	11.5505	1.34274	2.6091	0.207853	0.0267743	0.867327	0.300647
102127_at	Eif2d	-0.0504567	0.00555049	6.22159	5.50085	-0.551701	0.0499991	0.592779	0.961141	0.965979	0.991815
102128_f_at	Mrps25	-0.0111549	-0.174969	7.90981	6.84027	-0.132714	-1.72486	0.896945	0.116323	0.993879	0.521596
102129_at	Rps17	-0.0525972	0.142863	5.60708	5.20918	-0.582337	1.63305	0.572715	0.134569	0.965979	0.547976
102130_f_at	Gm20362	0.0448818	0.0678347	7.41121	7.95708	0.314265	1.03356	0.759517	0.326514	0.980316	0.723124
102131_f_at	Rnf20	-0.0900628	-0.0526594	9.98108	9.93777	-0.946344	-0.804712	0.365386	0.440334	0.922568	0.783989
102132_i_at	Alppl2	-0.0408809	-0.125002	7.51189	7.02054	-0.520778	-1.34024	0.6134	0.210825	0.965979	0.63896
102133_at	Zfp568	0.0337304	-0.00804094	5.80615	5.25299	0.375209	-0.0756037	0.715024	0.941277	0.978465	0.987651
102134_f_at	Atp5g2	0.0656496	0.0796168	9.22572	8.59834	0.715321	0.815835	0.490117	0.434243	0.953064	0.781286
102135_at	C78893	0.0225238	0.0629339	7.56773	7.07536	0.236364	0.612502	0.817728	0.554344	0.983851	0.843623
102136_r_at	C79246	-0.102531	-0.126747	5.51843	4.74245	-0.999362	-1.68663	0.340244	0.12363	0.913661	0.534377
102137_f_at	NA	-0.079046	-0.0469021	8.76416	9.29438	-0.956607	-0.603172	0.360417	0.560283	0.920239	0.847826
102138_at	D13Ertd37e	-0.176021	-0.129407	5.19928	4.87538	-1.81345	-1.73001	0.0986067	0.115369	0.770527	0.519422
102139_at	D13Ertd205e	-0.00304554	0.0407307	5.21822	5.11143	-0.0329828	0.402192	0.974311	0.696294	0.999391	0.910687
102140_at	C77137	0.0382529	-0.137708	7.02963	6.69017	0.457775	-1.35432	0.656505	0.206451	0.973173	0.635626
102141_f_at	NA	0.105923	0.195899	7.32226	7.48649	1.4043	1.70222	0.189306	0.120601	0.859585	0.530307
102142_r_at	Gm14743	-0.125053	-0.267315	6.18007	5.20534	-1.0424	-2.81377	0.320789	0.0189427	0.913091	0.261769
102143_at	NA	-0.0370421	-0.0958836	8.25	7.47853	-0.535441	-1.55264	0.603576	0.152614	0.965979	0.573184
102144_f_at	Sfpq	-0.425536	-0.0720448	4.81068	4.06003	-3.2859	-0.696228	0.00777134	0.502687	0.328584	0.818394
102145_f_at	Esrra	-0.0571847	-0.235979	8.1363	7.06656	-0.834636	-2.29037	0.422631	0.0458467	0.936581	0.369854
102146_at	Insr	-0.0791002	-0.0738612	6.44801	5.68822	-0.725076	-0.749844	0.484358	0.471209	0.95112	0.800246
102147_at	Akp3	-0.0801288	-0.0769146	7.38924	7.35901	-0.814594	-1.08919	0.433514	0.302487	0.940487	0.708726
102148_f_at	Ifna9	0.0438474	-0.0767737	8.05082	7.83235	0.460481	-0.756964	0.654625	0.467126	0.972514	0.79834
102149_f_at	Ifna7	-0.160684	-0.0563672	7.09358	6.52733	-1.95406	-0.699183	0.0780268	0.500919	0.746981	0.817336
102150_f_at	Ifna15	0.0276041	-0.0615858	6.58709	6.22475	0.341956	-0.899977	0.739176	0.390008	0.979115	0.756629
102151_at	Adrb1	0.00288555	-0.0833209	7.7817	7.57696	0.0387698	-1.26364	0.969806	0.235992	0.998611	0.662711
102152_f_at	NA	-0.0552933	-0.100654	8.9579	8.11689	-0.656458	-1.39243	0.52575	0.195001	0.954047	0.621693
102153_at	NA	-0.0414822	-0.0490136	6.17947	5.80382	-0.442972	-0.730497	0.666834	0.48242	0.974487	0.806184
102154_f_at	Adck1	-0.18027	0.096865	6.14752	5.95584	-1.94282	1.33239	0.0795128	0.213298	0.750398	0.640847
102155_f_at	Igkv10-96	0.00256144	0.00903263	5.56662	5.24718	0.0297537	0.112246	0.976825	0.912926	0.999391	0.980277
102156_f_at	NA	-0.647753	-0.084789	5.90882	6.51666	-2.78832	-0.442858	0.0184759	0.667616	0.471962	0.898986
102157_f_at	Igkv10-96	0.00916695	-0.0901228	5.5402	5.01112	0.0802497	-1.4369	0.937558	0.182322	0.995898	0.611942
102158_at	NA	-0.0965555	0.0115059	7.19422	6.50419	-1.22282	0.169257	0.248316	0.869085	0.889115	0.968054
102159_at	NA	-0.0915349	-0.25733	5.35393	5.19211	-1.06246	-3.83718	0.312013	0.00349256	0.910437	0.115384
102160_at	NA	-0.0556266	-0.0616602	6.62028	6.12719	-0.54236	-0.796455	0.598969	0.444893	0.965979	0.786837
102161_f_at	NA	0.147977	0.0177194	9.58592	11.6808	1.16019	0.116339	0.271843	0.909766	0.896754	0.979529
102162_at	NA	-0.0551646	-0.0485693	8.22932	7.3997	-0.536729	-0.366865	0.602717	0.721625	0.965979	0.918862
102163_at	Gm5802	0.018345	-0.0111741	8.21059	7.73341	0.262388	-0.112862	0.798133	0.91245	0.983753	0.980277
102164_at	Gja10	0.0285262	-0.0476439	5.29476	4.83562	0.322214	-0.668071	0.753658	0.519725	0.979894	0.826776
102165_at	NA	0.0330019	-0.0419643	8.02764	8.5717	0.300059	-0.524401	0.770028	0.611815	0.983719	0.873522
102166_g_at	NA	0.0757139	-0.189845	5.80238	5.34376	1.00748	-2.25829	0.336511	0.0483841	0.913255	0.378585
102167_at	NA	-0.189591	-0.0801322	7.13431	6.80509	-1.94	-1.34578	0.0798887	0.209097	0.750398	0.637339
102168_at	Olfr92	-0.0764432	-0.178228	5.87037	5.4903	-0.522032	-1.30592	0.612556	0.22181	0.965979	0.649571
102169_at	Olfr93	-0.00496457	-0.0678147	7.31821	6.80737	-0.0540639	-0.645951	0.957906	0.533349	0.998172	0.833611
102170_at	Olfr94	0.0653336	-0.0960816	8.33897	7.90645	0.785658	-0.998446	0.449551	0.342407	0.940698	0.73125
102171_r_at	Nr1i3	-0.0669738	0.26826	8.35124	10.3556	-0.800974	1.2822	0.441015	0.229675	0.940698	0.656635
102192_r_at	Acsm3	-0.0414812	-0.0959455	3.30295	3.31813	-0.439904	-0.979467	0.668984	0.351233	0.974487	0.736155
102193_at	Eri2	-0.16648	-0.109589	6.24518	5.6435	-1.80485	-1.33562	0.100014	0.212277	0.77212	0.639967
102194_at	Rpp25l	0.162586	-0.152033	8.15278	8.10619	1.6368	-1.18827	0.13146	0.263108	0.810287	0.683259
102195_at	Map4k4	0.0947902	0.197541	6.05804	5.41223	0.78809	2.161	0.448188	0.0569393	0.940698	0.401147
102196_at	Gna11	0.0316594	-0.107792	7.86069	7.22752	0.273129	-1.70719	0.790087	0.11965	0.983753	0.528959
102197_at	Nucb2	0.247191	0.0696012	5.21917	3.76276	2.70696	0.753247	0.0212997	0.469255	0.493489	0.799243
102198_at	Kcnn4	-0.0417135	-0.0488138	7.25998	6.9733	-0.452205	-0.8313	0.660382	0.425867	0.974465	0.777178
102199_at	Tars2	0.038088	-0.110282	6.81071	6.45031	0.391218	-1.06378	0.703511	0.313285	0.978151	0.716197
102200_at	Aqp8	0.0227537	-0.291925	7.30377	10.4872	0.24362	-0.965022	0.812251	0.358062	0.983851	0.739943
102201_s_at	Psen1	-0.0486537	-0.0391376	8.95445	8.01251	-0.492158	-0.68535	0.632804	0.509229	0.96961	0.822097
102202_s_at	Mpv17	-0.111214	-0.0995881	8.38212	7.61996	-0.955179	-1.23634	0.361106	0.245537	0.92104	0.670889
102203_at	Endou	-0.0210604	-0.19154	6.49961	5.94284	-0.265407	-2.2505	0.795869	0.0490201	0.983753	0.380936
102204_at	Mafb	-0.0518028	0.905385	6.62294	7.006	-0.533569	6.18683	0.604826	0.000119452	0.965979	0.0126913
102205_at	Gnptab	-0.109544	-0.115343	6.05616	5.44638	-1.03649	-1.50876	0.323412	0.16334	0.913091	0.589803
102206_at	Fkbpl	0.0170963	0.0103433	6.72705	6.55556	0.187002	0.144493	0.855247	0.88808	0.985795	0.972144
102207_at	Nrbp2	0.154949	0.733259	7.97462	7.64939	1.83701	4.73268	0.0948427	0.000879859	0.767729	0.0481916
102208_at	St3gal6	0.0192318	0.083961	7.70818	6.55951	0.131623	0.500641	0.897788	0.627828	0.993879	0.881721
102209_at	Nfatc1	-0.0447059	-0.013571	7.03824	6.77076	-0.399881	-0.210734	0.697313	0.837472	0.978151	0.959234
102210_at	Dtnb	0.0935141	-0.0539208	7.75023	7.66803	1.36579	-0.91703	0.200738	0.381443	0.86616	0.749749
102211_r_at	Sec24b	-0.000723797	-0.0991402	3.47297	3.26036	-0.00871476	-1.36838	0.993211	0.202162	0.999683	0.631056
102212_at	Rhox6	-0.0461138	0.0579998	6.99796	6.38631	-0.550358	0.591559	0.593667	0.567725	0.965979	0.851627
102213_at	Xirp1	-0.12113	0.0246483	6.48673	6.29265	-1.35539	0.317753	0.203923	0.757432	0.867074	0.931043
102214_at	Prx	-0.140363	-0.0348081	8.50557	8.43105	-1.68415	-0.312854	0.121805	0.761039	0.799555	0.932114
102215_at	Ift81	-0.192356	-0.00406805	7.80185	6.28282	-2.19885	-0.0429812	0.0514775	0.966592	0.668766	0.992171
102216_at	Alox12b	-0.0576474	-0.0641545	5.58027	5.14367	-0.734498	-0.880095	0.478836	0.400165	0.950182	0.763092
102217_at	Grk5	-0.107028	-0.100799	6.33212	5.66433	-0.977894	-0.995434	0.350268	0.343796	0.916955	0.731651
102218_at	Il6	-0.143002	-0.0300557	3.87406	3.49256	-1.05025	-0.376765	0.317332	0.714489	0.913033	0.915817
102219_at	Rfx2	-0.00201734	-0.148731	7.62108	7.67332	-0.0293607	-1.77155	0.977131	0.107934	0.999391	0.507136
102220_at	Utf1	-0.0409136	-0.0559409	8.61042	8.46428	-0.508239	-0.876277	0.621864	0.402136	0.966576	0.764025
102221_at	Syngr1	0.163437	-0.13612	8.63478	6.98349	1.68043	-1.31459	0.122541	0.218991	0.799555	0.645269
102222_at	Kdm6a	-0.0700888	0.271674	7.96436	7.00126	-0.33398	1.01034	0.745014	0.336961	0.979204	0.729302
102223_at	Ppl	0.0497659	0.279687	8.55673	7.96892	0.506943	3.39196	0.622742	0.00720268	0.966715	0.164329
102224_at	Igf1r	0.00402785	-0.100348	10.3029	7.46608	0.0319233	-1.166	0.975136	0.271584	0.999391	0.687254
102225_at	Rabgap1l	-0.0266225	0.0196118	6.48118	5.9624	-0.27721	0.192123	0.787037	0.851623	0.983753	0.963064
102226_at	Cpxm2	-0.0391687	0.00553711	7.02917	6.79144	-0.513869	0.0855508	0.618056	0.93357	0.966285	0.985513
102227_g_at	Cpxm2	0.0350108	-0.0110403	5.34871	4.71348	0.414358	-0.106708	0.687007	0.917204	0.976569	0.980822
102228_at	Lat	-0.0268572	-0.0417207	7.86353	7.87155	-0.237154	-0.652009	0.817132	0.529597	0.983851	0.832092
102229_at	Nmt2	-0.0814621	-0.0213313	6.03495	5.16704	-1.09611	-0.351715	0.297697	0.7326	0.907907	0.922841
102230_at	NA	-0.0428798	0.160189	7.34288	7.93283	-0.410465	1.29158	0.689772	0.226537	0.976569	0.653615
102231_at	Creb3l1	0.00625967	-0.0758609	9.48093	8.90525	0.0802676	-0.944375	0.937544	0.36799	0.995898	0.74367
102232_at	Slc39a9	-0.13607	-0.100907	7.55588	6.95996	-1.46791	-0.835322	0.171632	0.423707	0.845501	0.775943
102233_at	Mettl20	0.0543004	-0.597486	5.67188	5.62426	0.562687	-3.68068	0.585541	0.00449282	0.965979	0.131326
102234_at	NA	-0.00689622	-0.0578064	6.28339	5.59381	-0.0911419	-0.940244	0.929107	0.37	0.995898	0.74367
102235_at	Mycl	-0.109256	-0.00559334	6.93198	7.54248	-1.16142	-0.0579433	0.271366	0.954974	0.896754	0.990755
102237_at	Cd28	-0.0978947	0.0549265	5.14851	4.82645	-1.09665	0.6224	0.297472	0.548083	0.907907	0.84015
102238_at	Ascl1	0.0327435	-0.101505	6.65701	6.13313	0.452268	-1.1693	0.660339	0.270315	0.974465	0.686717
102239_at	Bcl3	-0.263542	-0.0999357	8.92878	8.91042	-3.46798	-0.894903	0.00568137	0.392583	0.274232	0.758062
102240_at	Ppargc1a	0.133256	0.176151	6.04604	4.06443	1.22384	1.76331	0.247945	0.109373	0.888776	0.508885
102241_f_at	Tcf7l2	-0.146991	-0.120555	9.14684	8.80976	-1.58384	-1.7348	0.14306	0.114488	0.819929	0.518206
102242_at	Per3	0.0178567	-0.0753019	7.68732	7.05166	0.208518	-1.05315	0.838841	0.31789	0.984184	0.719587
102243_at	Ehf	0.0565887	0.0502947	5.96926	4.60237	0.540576	0.775654	0.600155	0.456516	0.965979	0.792461
102244_at	Prss39	0.0347587	-0.129333	5.71165	5.1237	0.432023	-1.04615	0.674522	0.320954	0.975344	0.720877
102247_at	Ubr1	-0.0784438	-0.00372474	4.95497	4.34304	-0.814076	-0.0504508	0.433798	0.960791	0.940487	0.991763
102248_f_at	Cask	0.0198987	0.0239123	8.29248	7.49701	0.201858	0.209162	0.843911	0.838665	0.984752	0.95944
102249_at	Avil	0.0716709	-0.0282577	6.76523	6.34559	0.968913	-0.28988	0.354524	0.778032	0.918336	0.93703
102250_at	Il27ra	-0.170174	-0.0793068	8.97574	8.41067	-1.66143	-0.973543	0.126357	0.354022	0.805193	0.737116
102251_at	Trpm1	-0.0640752	-0.0272809	7.18268	6.70431	-0.949064	-0.370868	0.364064	0.718736	0.922197	0.917748
102252_at	Pfdn2	0.306816	0.161479	8.42644	7.77983	3.33986	1.23979	0.00708044	0.244315	0.314664	0.670621
102253_at	AF067063	-0.00505103	-0.0990851	5.76991	5.56056	-0.0606849	-1.27689	0.952758	0.231468	0.99707	0.657788
102254_f_at	NA	-0.116435	-0.0479558	5.78532	5.57946	-1.59068	-0.347007	0.141513	0.736024	0.816598	0.924602
102255_at	Osmr	-0.340166	0.0751192	6.12505	4.41184	-2.59336	0.722805	0.0259746	0.486924	0.538652	0.808203
102256_at	Tbx15	-0.0116183	-0.0102585	5.35288	4.69092	-0.147868	-0.130495	0.885267	0.898851	0.990329	0.975734
102257_at	Pknox1	-0.0691556	-0.0396094	7.44957	7.03023	-0.770614	-0.399309	0.458039	0.698347	0.943606	0.911853
102258_at	Stra6	0.033843	-0.147365	7.13118	6.76601	0.339259	-1.9796	0.741148	0.0769208	0.979115	0.449001
102259_at	Ywhag	-0.0286486	0.00522876	6.19666	5.74939	-0.283225	0.0473803	0.782547	0.963175	0.983753	0.991815
102260_at	Gfi1b	-0.00541523	-0.145397	7.16257	6.52655	-0.0618258	-1.72534	0.951871	0.116234	0.99698	0.521596
102261_f_at	Col13a1	0.0394191	0.0654741	7.29854	7.15366	0.52493	0.736754	0.61061	0.478776	0.965979	0.803723
102262_r_at	Col13a1	0.00325182	0.0117529	5.01039	4.97882	0.0428826	0.193332	0.966605	0.850702	0.998458	0.963022
102263_at	Zfp143	-0.0533926	0.225141	6.14198	5.17028	-0.567695	2.41912	0.582258	0.0369105	0.965979	0.345442
102264_at	Slfn1	-0.0779535	-0.0200331	6.13027	5.15603	-0.886382	-0.268974	0.395393	0.793605	0.928381	0.941808
102265_at	Myf6	-0.054279	-0.045838	6.17041	5.70135	-0.697193	-0.648836	0.500929	0.53156	0.954047	0.833411
102266_at	Inha	0.0851355	-0.0807134	7.82014	7.37508	1.18418	-1.24086	0.262632	0.243936	0.894848	0.670621
102267_at	B3galt4	0.0518926	-0.0171009	7.02469	6.65559	0.464516	-0.166611	0.651825	0.871111	0.971884	0.968439
102268_at	Rexo1	0.118013	-0.0256618	8.70443	8.35449	1.34033	-0.412523	0.208608	0.688959	0.868176	0.908528
102269_at	Alox12e	-0.00660936	-0.0809534	7.69552	7.34411	-0.0770228	-0.961566	0.940063	0.35971	0.995898	0.740896
102271_at	Zmiz2	0.0172976	0.0161175	9.09849	8.5039	0.193285	0.262268	0.850448	0.79862	0.985545	0.944161
102272_at	Cd160	0.0323677	0.0209409	5.026	4.4997	0.4059	0.223352	0.69302	0.827912	0.977058	0.956514
102273_at	Atp6v0a2	-0.103004	-0.099832	7.79515	7.03095	-1.26605	-0.857681	0.233047	0.411835	0.879887	0.770486
102274_at	H2-Oa	0.0199174	-0.0461326	7.4543	7.18176	0.245945	-0.784226	0.810498	0.451702	0.983851	0.789152
102275_at	Zfp185	-0.0561146	-0.0767137	5.71891	5.30949	-0.52798	-0.779151	0.608565	0.454548	0.965979	0.790804
102277_at	Zfp26	-0.207566	-0.0213652	5.62926	4.9238	-2.06382	-0.192118	0.0648254	0.851627	0.706735	0.963064
102278_at	Ppie	0.135952	0.110961	6.18667	5.86438	1.69133	1.43246	0.120398	0.183555	0.798051	0.61225
102279_at	Uba7	-0.12991	0.165658	7.64302	7.61009	-1.21548	1.44994	0.250985	0.178741	0.889115	0.609788
102280_at	Pcdh7	0.0837858	-0.0444926	4.49067	3.90377	0.686302	-0.50898	0.507495	0.622184	0.954047	0.879038
102281_at	Cd27	0.0697729	0.00760935	7.995	7.31544	0.97669	0.104587	0.350836	0.918842	0.916955	0.98123
102282_g_at	Cd27	-0.0283619	-0.0507605	6.79837	6.28864	-0.341891	-0.827957	0.739223	0.427669	0.979115	0.778645
102283_at	Tiam1	-0.0387284	-0.0789867	5.78189	4.79786	-0.503244	-1.04949	0.625252	0.319489	0.966715	0.720295
102284_at	Masp1	-0.0287952	0.300649	3.55152	7.78265	-0.393129	1.31294	0.702141	0.219524	0.978151	0.645338
102285_at	Mgmt	-0.0679961	-0.0971751	6.92372	6.84049	-0.761897	-1.53824	0.463005	0.156064	0.944619	0.577631
102286_at	Araf	-0.009862	-0.151074	8.31453	8.11952	-0.094884	-1.93855	0.926206	0.0822876	0.995898	0.458321
102287_at	Cd247	-0.0385986	-0.0194638	5.38727	5.59686	-0.385014	-0.223379	0.707963	0.827891	0.978151	0.956514
102288_at	Cd247	-0.0171127	0.0771015	5.68407	4.91529	-0.23664	0.836545	0.81752	0.423052	0.983851	0.775901
102289_r_at	Cr2	-0.0651509	0.0583511	3.44027	3.44598	-1.00258	0.64621	0.338761	0.533188	0.913661	0.833611
102290_at	Alox12	-0.149731	-0.0211038	7.41431	7.00061	-1.92358	-0.262571	0.0821167	0.798394	0.752764	0.944161
102291_at	F9	0.00304128	-0.150235	5.22664	10.0452	0.0420684	-0.718239	0.967239	0.48961	0.998611	0.809513
102292_at	Gadd45a	0.095631	-0.430341	8.38059	6.1994	0.687003	-2.21496	0.507071	0.0520281	0.954047	0.388593
102293_at	Ikzf1	-0.14566	-0.176457	6.58578	6.11832	-1.77716	-2.30077	0.104674	0.0450523	0.774029	0.367194
102294_at	Ikzf1	-0.0615732	0.0640905	6.24632	5.79045	-0.78373	0.867448	0.450633	0.406721	0.940698	0.766636
102295_at	Kcna5	-0.0786524	-0.0237999	5.53553	4.59537	-0.942216	-0.331743	0.367398	0.747166	0.922568	0.928831
102296_at	Pcsk2	0.084594	0.0167793	6.94266	6.60352	1.15322	0.177737	0.274566	0.8626	0.898058	0.966459
102297_at	Zkscan6	0.00404487	0.0656518	6.12887	6.01261	0.0595644	0.972788	0.953629	0.354378	0.997551	0.737116
102298_at	Ngf	0.0648406	-0.175028	5.9132	6.01653	0.754223	-2.16864	0.467405	0.0562171	0.946482	0.398358
102299_at	Prkca	-0.0804296	-0.105275	4.75736	4.70483	-0.854328	-1.32123	0.41212	0.21685	0.932663	0.644078
102300_at	Rapsn	0.0214773	-0.0382935	7.57956	6.73849	0.229041	-0.364393	0.823266	0.723411	0.983851	0.919581
102301_at	Capza3	-0.104915	-0.0113807	4.10468	3.84502	-1.04217	-0.18313	0.320892	0.858481	0.913091	0.96555
102302_at	Bckdhb	0.0337355	0.150679	8.2742	9.11023	0.261608	1.27967	0.798719	0.230529	0.983753	0.657488
102303_i_at	Zfp61	-0.140826	-0.149552	7.99509	7.68403	-1.87309	-1.91299	0.0893318	0.0858048	0.758329	0.465662
102304_f_at	Zfp61	-0.0567573	0.161042	5.67203	4.9548	-0.469351	1.76785	0.648479	0.108579	0.971884	0.508211
102305_at	Gpr37l1	-0.0755574	-0.0498699	6.92931	6.87772	-0.789196	-0.666413	0.447569	0.520738	0.940698	0.827246
102306_at	Hs2st1	-0.0871232	0.0608264	4.83778	4.23025	-1.25745	0.646599	0.236024	0.532947	0.880336	0.833611
102307_at	Dcx	-0.0619193	-0.0976678	5.40812	5.08254	-0.725658	-0.979443	0.484016	0.351244	0.95112	0.736155
102308_at	Tulp3	-0.205157	-0.0497713	9.09276	7.79577	-2.20372	-0.670377	0.0510488	0.518316	0.665446	0.82662
102309_at	Zfp326	-0.137763	0.174497	6.81421	6.11368	-2.05022	2.44981	0.0663395	0.0350471	0.709287	0.337326
102310_at	Ccl22	0.0158598	-0.0924418	8.48906	8.00498	0.179143	-1.32811	0.861258	0.214655	0.986536	0.641296
102311_at	Gp9	-0.0365639	0.0226786	7.90933	7.48943	-0.565199	0.342988	0.583893	0.738951	0.965979	0.925393
102312_r_at	Dda1	0.0574738	-0.0188474	8.08575	7.66039	0.810574	-0.325644	0.435719	0.751635	0.940487	0.929895
102313_at	Gch1	-0.071667	0.0811238	4.97313	8.49427	-0.69866	0.641548	0.500049	0.536085	0.954047	0.834752
102314_at	Slc2a4	-0.0580943	0.0323505	8.25129	7.70034	-0.502528	0.334734	0.625738	0.744977	0.966715	0.927853
102315_at	Cirh1a	-0.0913184	0.504546	7.4243	6.40847	-0.79851	4.84352	0.442381	0.000747697	0.940698	0.0430288
102316_at	Capn5	0.0226229	-0.0307993	7.57548	6.75353	0.259725	-0.489357	0.800132	0.635505	0.983753	0.884122
102317_at	Vamp4	-0.149338	-0.0903794	6.83211	6.05744	-1.31773	-0.739914	0.21581	0.476943	0.874789	0.80311
102318_at	St8sia4	-0.368185	-0.17025	5.14234	4.33993	-3.0741	-2.00475	0.0112208	0.0737982	0.368145	0.439691
102319_at	Snx12	0.217638	0.0683517	6.28593	5.05769	2.16887	0.836437	0.0541924	0.42311	0.676663	0.775901
102320_at	Snx12	-0.0216983	0.0775008	7.76503	6.67172	-0.259752	1.03269	0.800112	0.326902	0.983753	0.723124
102321_at	Adcy6	-0.275358	-0.123629	9.09082	7.24992	-1.49744	-1.68806	0.163922	0.12335	0.840449	0.533747
102322_at	Ugdh	0.120104	-0.0942324	10.1128	9.60136	0.925837	-0.446012	0.37546	0.665415	0.923398	0.89877
102323_at	Hap1	-0.0139798	-0.0934043	9.36017	9.61376	-0.136585	-1.13473	0.89396	0.28385	0.993749	0.696099
102324_at	Dnajc4	0.158412	-0.139775	7.27806	6.8668	1.92708	-2.04405	0.0816374	0.0691584	0.752764	0.427846
102326_at	Ncf2	-0.0629159	0.278131	5.17913	4.97987	-0.528902	2.73879	0.607947	0.0215011	0.965979	0.280571
102327_at	Aoc3	-0.0657927	0.0206636	6.84993	5.93016	-0.467717	0.290252	0.649609	0.777756	0.971884	0.936788
102328_at	Casp8	0.138013	0.40404	6.21456	5.73326	1.17505	4.93832	0.266109	0.000651436	0.895745	0.039951
102329_at	Cideb	0.161885	-0.113055	10.3158	11.1677	1.51085	-1.22632	0.160519	0.249119	0.840449	0.674105
102330_at	Aif1	-0.0443967	0.363929	6.08765	6.14341	-0.549385	2.00128	0.594311	0.0742224	0.965979	0.4405
102331_at	St5	-0.100915	0.156193	7.99705	8.03733	-0.862825	1.87714	0.407639	0.0909756	0.932663	0.47489
102332_at	Ulk1	0.18086	0.757779	8.29387	8.52915	1.90079	5.15411	0.0853036	0.000478337	0.752764	0.0322891
102333_at	Epn2	-0.0260133	-0.0607342	8.90584	7.78623	-0.307675	-0.939619	0.764387	0.370305	0.981527	0.74367
102334_at	Dok2	0.0705932	0.100923	7.63369	7.36618	0.855277	1.14609	0.411618	0.279344	0.932663	0.693731
102335_at	Kcnk1	0.16251	0.0756352	10.0978	6.4764	1.52856	0.780671	0.156121	0.453694	0.835416	0.790351
102336_at	Tmem131	0.0739021	0.340996	7.48189	6.61872	0.725469	3.38685	0.484127	0.00726372	0.95112	0.164329
102337_s_at	Fcgr2b	-0.115176	0.30272	7.02397	6.59551	-0.830209	1.60521	0.425019	0.140591	0.936928	0.557712
102338_at	Pde9a	0.0381611	-0.423431	6.10642	5.66006	0.440292	-4.65579	0.668712	0.000986059	0.974487	0.0515226
102340_at	Mina	-0.0667787	-0.186846	5.3461	4.61282	-0.834805	-1.95139	0.42254	0.0805726	0.936581	0.457295
102341_at	Gla	0.116885	0.187846	5.66183	4.93411	1.36288	2.17946	0.201624	0.0552106	0.86616	0.396475
102342_at	Nsf	0.00277424	0.0227717	8.45076	7.55206	0.0287949	0.28126	0.977572	0.784441	0.999391	0.939134
102343_at	Cd320	0.127102	-0.166055	8.6502	7.34521	1.34756	-2.22979	0.206347	0.0507515	0.867292	0.384825
102344_s_at	Tcea3	-0.0487902	-0.106681	7.5437	8.16516	-0.273825	-0.928242	0.789567	0.375885	0.983753	0.746015
102345_at	Lefty1	-0.0311113	-0.0202249	7.65758	7.05083	-0.309494	-0.266925	0.763042	0.795136	0.981527	0.942451
102346_at	Ercc3	-0.000399859	0.0188542	6.04225	5.28599	-0.00463382	0.154698	0.99639	0.880243	0.999683	0.971259
102348_at	NA	0.208456	0.908975	8.10644	8.08889	0.757917	4.47172	0.465284	0.00129979	0.945453	0.0617179
102349_at	Adprhl2	0.00136659	0.0396379	8.36395	7.64804	0.0179311	0.414091	0.986032	0.687848	0.999683	0.908402
102350_at	Adprhl2	0.108801	-0.0964659	7.80908	6.53679	1.36548	-1.17349	0.200833	0.268709	0.86616	0.685679
102351_at	Cpa3	-0.00405755	-0.0825043	4.62351	4.03521	-0.0593734	-1.09464	0.953777	0.300205	0.997551	0.707536
102352_at	Galnt10	-0.0551317	-0.085909	7.24489	6.5214	-0.569219	-1.1293	0.581261	0.286023	0.965979	0.697531
102353_at	Itgb2	-0.0620326	0.226973	4.89793	4.96423	-0.624195	1.13864	0.545912	0.282295	0.958511	0.694975
102354_at	Tcf19	-0.159285	0.00420548	6.39914	5.90381	-1.38057	0.0675123	0.196285	0.94755	0.863872	0.98954
102356_at	Dcaf11	0.0176361	0.0384784	8.03158	8.19804	0.12692	0.332264	0.901418	0.746784	0.994602	0.928743
102357_at	C2cd3	-0.0828916	0.0439972	7.99844	7.44225	-1.04188	0.542249	0.321019	0.599927	0.913091	0.868927
102360_at	Mthfr	-0.226697	-0.0731934	6.21504	5.43431	-1.62964	-0.39141	0.132979	0.703986	0.810287	0.913339
102362_i_at	Junb	0.170096	-0.0992505	8.51783	7.88423	1.39518	-1.45446	0.191961	0.177516	0.860758	0.608348
102363_r_at	Junb	0.0449591	-0.0630799	8.3776	7.96042	0.394351	-0.748344	0.701267	0.472073	0.978151	0.800592
102364_at	Jund	0.34684	0.863598	12.0293	11.2967	2.13388	3.67596	0.057535	0.00452726	0.685056	0.131633
102366_at	Retn	-0.521736	-0.0156875	7.90759	6.93311	-1.56222	-0.210724	0.148051	0.83748	0.823914	0.959234
102368_at	Lyrm2	-0.0357208	0.180334	6.67799	4.94526	-0.256988	1.227	0.802188	0.248877	0.983753	0.674105
102370_at	Hsd17b11	0.20133	0.427678	8.83945	9.90485	0.965472	3.6622	0.356165	0.00462938	0.918559	0.132381
102371_at	Nr4a1	0.295882	0.0497591	6.81888	5.89252	3.14824	0.82657	0.00986393	0.428417	0.347968	0.778645
102372_at	Igj	-0.208193	-0.0544626	5.58997	4.85294	-1.58848	-0.783634	0.14201	0.452033	0.817293	0.789229
102373_at	Enpep	-0.028811	0.0110647	9.18038	9.41542	-0.204115	0.0613952	0.842192	0.952296	0.984752	0.98983
102374_at	Rcan3	-0.047216	-0.102073	7.78346	5.91428	-0.445559	-0.981312	0.665024	0.350368	0.974465	0.736102
102375_at	Smyd5	0.0935699	-0.0179394	7.84566	7.47908	1.27252	-0.267426	0.230829	0.794762	0.879754	0.942186
102376_r_at	Pcp2	-0.0261251	-0.113749	9.53998	8.99815	-0.336472	-0.943123	0.743188	0.368598	0.979115	0.74367
102378_at	Sspn	0.210764	-0.0294338	5.73748	4.51744	2.11165	-0.287497	0.0597596	0.779802	0.687107	0.937859
102379_at	Rassf1	-0.0240762	0.115194	7.01823	5.94326	-0.336623	1.63106	0.743078	0.134991	0.979115	0.54865
102380_s_at	Hoxd4	-0.359183	-0.0219023	7.918	6.7292	-3.69602	-0.270904	0.00385386	0.792163	0.224893	0.941082
102381_at	Acsl4	0.118262	0.37845	7.25771	7.06505	0.470646	2.29499	0.647584	0.045492	0.971884	0.369029
102382_at	Arntl	0.0153685	0.0544127	7.24483	7.37174	0.125879	0.446997	0.902222	0.664728	0.994689	0.89877
102383_at	Fam117a	-0.0449529	-0.193226	7.52324	6.02551	-0.542797	-2.31974	0.598679	0.0436385	0.965979	0.364632
102384_at	Smarca2	-0.203821	-0.171355	6.37294	6.05814	-0.738753	-0.929234	0.476356	0.375396	0.949821	0.746015
102385_at	Wdr43	0.051913	0.170525	8.05261	7.44706	0.594631	2.07016	0.564769	0.0662294	0.963647	0.423488
102387_at	Rsl24d1	-0.133023	0.111654	8.00913	7.82245	-0.834733	1.2483	0.422579	0.241319	0.936581	0.668692
102389_s_at	Gap43	-0.113936	-0.0805099	5.31482	4.36819	-1.71021	-1.03473	0.116768	0.325992	0.793198	0.722898
102393_at	Cryaa	-0.00536894	-0.0650931	7.83474	7.55167	-0.0610013	-0.993695	0.952512	0.3446	0.996999	0.732302
102395_at	Pmp22	0.104245	0.139805	6.31948	5.247	1.58524	2.05539	0.142744	0.0678712	0.819929	0.427129
102396_at	Ift172	-0.0408299	0.0397061	8.71081	7.96032	-0.4114	0.53144	0.689107	0.607112	0.976569	0.87166
102397_at	Cbfa2t3	0.0180441	-0.0596765	6.3574	4.82364	0.233021	-0.652068	0.820255	0.52956	0.983851	0.832092
102398_at	Rxrb	-0.110373	-0.024896	10.0926	9.71157	-1.50947	-0.410683	0.160866	0.690263	0.840449	0.909187
102399_at	Rbpms	0.212077	0.567534	8.32256	7.27884	2.52383	6.75666	0.0293234	5.90363e-05	0.55907	0.00878217
102400_at	Ncbp1	-0.0181459	0.152212	6.19397	5.7483	-0.235728	1.66341	0.818209	0.128268	0.983851	0.539966
102401_at	Irf1	-0.400595	-0.731705	8.34749	8.26331	-4.86714	-6.19058	0.000579788	0.000118883	0.0727757	0.0126913
102402_at	Gbas	0.316655	0.27416	9.81428	7.48316	2.8028	2.41516	0.0180142	0.0371578	0.469705	0.345452
102403_at	Cdc45	-0.0239122	0.033097	6.82164	6.34888	-0.271931	0.497606	0.790983	0.629888	0.983753	0.882437
102404_at	Lamc1	-0.044115	-0.0872488	4.6151	4.54676	-0.489935	-0.876851	0.634323	0.40184	0.969836	0.764025
102405_at	Mag	-0.141786	-0.0494453	6.83639	6.60226	-1.51487	-0.667871	0.159512	0.519847	0.84024	0.826776
102406_at	Cma1	0.0174242	-0.102495	5.29294	4.55236	0.247096	-1.21186	0.809631	0.254363	0.983851	0.676137
102407_at	Cma1	-0.0957889	0.115613	6.48674	5.90626	-0.918356	1.23226	0.379184	0.246992	0.925758	0.672283
102408_g_at	Cma1	-0.0415854	-0.0446509	7.27435	6.74117	-0.486824	-0.599564	0.636453	0.56259	0.969965	0.848935
102409_at	Lsm8	0.0491924	0.255486	7.85706	6.80898	0.716845	2.40372	0.489214	0.0378819	0.953035	0.348871
102410_at	Hs3st1	-0.0676662	0.0106731	4.47035	3.95582	-0.994965	0.143869	0.34228	0.88856	0.915534	0.972257
102411_at	Zfp239	-0.0714652	-0.0665956	6.22923	5.29749	-0.666572	-0.606501	0.519521	0.55816	0.954047	0.846511
102412_at	Nup107	0.137022	0.00509507	7.95262	7.14347	1.40427	0.0690864	0.189316	0.946329	0.859585	0.989211
102413_at	Lmo1	-0.074163	-0.110029	7.7051	6.81246	-0.838739	-1.22128	0.420426	0.250936	0.936581	0.674745
102414_i_at	Dnajc3	-0.127652	-0.0624988	8.04196	8.12298	-0.785285	-0.18449	0.44976	0.857443	0.940698	0.965259
102415_r_at	Dnajc3	-0.163987	-0.0590991	5.44234	5.90311	-1.02437	-0.241982	0.328836	0.813852	0.913091	0.949985
102416_at	Cyp17a1	-0.0665693	0.144538	7.48934	10.6001	-0.853683	0.644502	0.412461	0.534249	0.932663	0.833738
102418_at	Tex19.1	-0.0388789	-0.0373432	6.13734	5.94856	-0.475167	-0.45319	0.644464	0.660417	0.971884	0.897409
102419_at	Rarg	-0.166556	-0.0262928	7.41066	6.78148	-2.15335	-0.388558	0.0556512	0.706026	0.680012	0.913646
102421_at	Lmf1	0.00964588	-0.073958	8.45189	8.43219	0.0851078	-0.794592	0.933788	0.445926	0.995898	0.787129
102423_at	Uxs1	0.0345904	0.0118133	4.24237	3.48082	0.316299	0.132254	0.758016	0.897497	0.98003	0.975282
102424_at	Ccl3	-0.0672287	-0.181628	6.81249	6.61803	-0.866362	-2.01763	0.405784	0.0722462	0.932346	0.433674
102425_at	Tle1	-0.341907	0.0364497	4.80207	5.88835	-4.02935	0.168334	0.00220765	0.869792	0.164767	0.968054
102426_at	Casq1	-0.0837494	-0.0872271	8.9882	8.33203	-0.908655	-1.41063	0.384052	0.189724	0.925848	0.616589
102427_at	Fyttd1	-0.113452	0.0284744	6.68959	6.25959	-0.603731	0.213237	0.558926	0.835574	0.962761	0.958803
102429_at	Slc22a12	-0.142596	-0.101297	11.5236	7.33028	-1.18764	-1.30513	0.261322	0.222067	0.894019	0.649758
102430_at	Myd88	-0.124756	0.206827	7.38457	7.22945	-1.80141	2.74081	0.100584	0.0214278	0.77212	0.280571
102431_at	Mapt	-0.278018	0.0840838	10.2448	6.46015	-2.14666	0.624416	0.0562915	0.546812	0.682493	0.839822
102476_f_at	Xpo7	0.0508834	-0.0292291	7.69753	7.52761	0.472681	-0.197025	0.646179	0.84789	0.971884	0.962586
102477_at	NA	0.0576352	-0.000150675	7.45025	7.23432	0.641633	-0.00228796	0.53496	0.998221	0.955881	0.999522
102478_f_at	Fbxw4	-0.156946	-0.0318321	7.41755	7.46029	-1.73217	-0.484751	0.112669	0.638652	0.785599	0.886353
102552_at	Gja3	-0.00642383	-0.022378	6.61791	6.3519	-0.0907921	-0.303149	0.929378	0.768201	0.995898	0.934928
102553_at	NA	-0.0556312	-0.0753246	5.41275	5.19736	-0.433828	-0.736278	0.673252	0.479053	0.974762	0.803723
102554_at	Olfr16	-0.1501	-0.0421546	5.89526	5.49317	-1.45368	-0.507698	0.175458	0.62305	0.850923	0.879301
102555_at	NA	-0.0369332	0.0725711	6.39016	5.97535	-0.394271	0.920936	0.701324	0.3795	0.978151	0.748394
102556_at	Adra2a	-0.0385709	-0.0275548	6.20771	5.41748	-0.340579	-0.233243	0.740183	0.820439	0.979115	0.953039
102557_at	Hist2h2ab	-0.0379254	-0.0697601	6.27539	5.73781	-0.464204	-0.995961	0.652042	0.343553	0.971884	0.731258
102558_at	Hist2h2be	-0.0292974	-0.12026	5.72237	5.23458	-0.231019	-1.10113	0.821769	0.29751	0.983851	0.706424
102559_at	Bmp2	-0.0358869	0.0655123	5.36371	5.19738	-0.488594	0.741271	0.635241	0.476156	0.969965	0.80311
102560_at	Cntn4	0.0211599	0.0438965	6.07559	5.99164	0.24492	0.639894	0.811271	0.537116	0.983851	0.834752
102561_at	Atp5k	-0.125265	-0.127343	8.61684	7.99984	-1.28726	-1.16433	0.225842	0.272229	0.879754	0.687838
102562_at	NA	-0.111324	-0.0855306	8.39317	8.2503	-1.43495	-1.04119	0.180607	0.323137	0.85757	0.722014
102566_at	Dcc	0.0127236	-0.0821229	7.87056	7.077	0.137754	-0.99518	0.893059	0.343914	0.993543	0.73166
102567_at	Hoxd13	-0.0624426	-0.0640442	6.92837	6.47249	-0.916616	-0.684374	0.380054	0.509818	0.925848	0.822334
102568_at	Nobox	-0.106707	-0.0550613	5.29766	4.97626	-1.27947	-0.798256	0.228464	0.443896	0.879754	0.786585
102569_at	Atoh1	0.0200421	-0.0896823	7.04756	7.3039	0.2651	-1.11375	0.7961	0.29232	0.983753	0.702333
102570_at	NA	0.0113514	-0.0756708	6.54603	6.00957	0.123631	-0.82472	0.903958	0.429417	0.994689	0.779067
102571_at	Gjb6	-0.0170738	-0.039241	6.18865	5.66857	-0.159412	-0.59313	0.87639	0.566715	0.988109	0.851366
102572_at	Rasgrf2	-0.128209	-0.0260685	4.84962	4.46557	-1.65537	-0.323911	0.127595	0.752906	0.807195	0.930711
102573_at	Nxph1	0.0408103	0.001236	6.21605	5.56036	0.504175	0.0146828	0.62462	0.988584	0.966715	0.997065
102574_at	Fgf11	-0.0252166	-0.213885	7.03318	6.59543	-0.262284	-2.91006	0.798212	0.0161028	0.983753	0.244041
102575_at	Orm3	-0.0277447	0.252171	7.75982	8.38043	-0.324865	1.13773	0.751707	0.282654	0.979894	0.694975
102576_at	Hrh1	0.0539638	-0.0209487	6.44285	5.86212	0.551407	-0.213119	0.592973	0.835663	0.965979	0.958803
102577_at	Kcnab3	-0.0193286	0.0417912	6.68266	6.24276	-0.17996	0.566884	0.860633	0.583719	0.986536	0.860217
102578_at	Pax5	-0.0734173	-0.0330946	6.81224	6.37801	-0.922054	-0.452378	0.37734	0.660981	0.924768	0.897503
102579_f_at	Hoxa6	-0.132589	-0.0739626	6.82967	5.1502	-1.56794	-0.851994	0.146715	0.414832	0.822581	0.772046
102580_r_at	Hoxa6	-0.116695	0.0609436	7.40755	7.24757	-1.64313	0.772689	0.130131	0.458188	0.809183	0.7932
102581_at	Mycs	-0.117567	-0.00097482	6.62114	6.26341	-1.28058	-0.0100626	0.228091	0.992176	0.879754	0.99793
102582_at	Apc2	-0.031437	-0.10864	7.97721	7.43339	-0.405641	-1.58273	0.693204	0.145625	0.977058	0.562522
102583_at	Olfr138	-0.0350073	-0.0470592	4.65731	4.20342	-0.469243	-0.3828	0.648554	0.710153	0.971884	0.914598
102584_at	Dyrk1b	-0.0602596	-0.029035	8.83554	8.31176	-0.934457	-0.438445	0.371202	0.670702	0.922918	0.900132
102585_f_at	NA	-0.0142657	-0.00816047	7.33488	6.8446	-0.147953	-0.100232	0.885202	0.922209	0.990329	0.982892
102586_at	Ror1	-0.190644	-0.102572	7.13978	6.75188	-2.36549	-1.02358	0.038615	0.330972	0.617677	0.725501
102599_at	Tpt1	0.124061	-0.03066	13.0424	12.708	1.19507	-0.341269	0.25853	0.740205	0.892401	0.925848
102612_at	Nrl	-0.122881	-0.0747026	6.17693	6.05307	-1.09853	-0.889605	0.296687	0.395284	0.907567	0.759783
102613_at	Tiaf2	-0.00980056	-0.0647523	6.71648	6.60366	-0.131567	-0.875741	0.897831	0.402414	0.993879	0.764025
102614_at	Prox1	-0.162121	-0.00706999	4.56325	5.38143	-1.61225	-0.0362908	0.136731	0.971789	0.814125	0.992679
102619_at	Fgd3	-0.030433	0.00549682	7.16635	7.15038	-0.427149	0.0965041	0.677957	0.925092	0.975344	0.983949
102620_at	Dnajb5	0.0319281	-0.0640562	7.76189	7.47506	0.381236	-0.792747	0.710681	0.44695	0.978151	0.787485
102621_at	Cdon	-0.0406038	-0.0273838	6.32291	5.96954	-0.428702	-0.336081	0.676861	0.743992	0.975344	0.92741
102622_r_at	Clcn1	0.02638	0.0229508	4.77671	4.44655	0.39769	0.29054	0.698878	0.777542	0.978151	0.936621
102623_at	Sema3f	0.0488035	-0.0661439	6.13685	5.60723	0.515481	-0.867653	0.616968	0.406614	0.966122	0.766636
102624_at	Stc2	-0.0896842	-0.0186125	6.7871	6.32053	-1.02824	-0.321856	0.327096	0.754415	0.913091	0.930711
102625_f_at	Zfp54	0.0399198	-0.0597564	3.28368	3.10189	0.446583	-0.64681	0.664308	0.532816	0.974465	0.833611
102626_r_at	Zfp54	-0.0410913	-0.102373	5.04419	4.23587	-0.219696	-0.826609	0.830349	0.428396	0.983851	0.778645
102627_at	Igf2bp1	-0.0659572	-0.0388843	6.63622	5.88515	-0.811745	-0.381554	0.435076	0.711047	0.940487	0.915229
102628_at	Fhit	-0.0904453	-0.070732	7.13655	6.38796	-0.777711	-0.938128	0.454022	0.371033	0.942212	0.744007
102629_at	Tnf	0.0337895	-0.081018	6.82747	6.44981	0.421952	-1.13985	0.681627	0.281814	0.975946	0.694874
102630_s_at	Lta	-0.0944206	0.0329753	7.46742	7.12956	-0.978295	0.427221	0.350078	0.678581	0.916955	0.903713
102631_at	Blm	0.0107535	-0.00728193	6.37526	5.69727	0.128338	-0.125957	0.900323	0.902348	0.994545	0.977059
102632_at	Aspm	-0.0259245	0.0359933	4.75528	4.31448	-0.342104	0.496271	0.739067	0.630796	0.979115	0.882745
102633_at	Grap2	-0.0098978	-0.0704448	6.17274	6.256	-0.0936185	-0.846627	0.927187	0.417675	0.995898	0.77324
102635_at	Vti1a	0.143019	-0.0356325	5.91556	5.11192	1.82672	-0.449643	0.0964697	0.662884	0.769785	0.898134
102636_at	Klc2	-0.0504691	-0.135196	9.42445	8.5468	-0.722146	-2.21753	0.486084	0.0518042	0.95112	0.388081
102637_at	Tgfbr3	0.0470016	-0.125625	6.75331	6.04386	0.604479	-1.49474	0.558447	0.166902	0.962761	0.593642
102638_at	Cst7	-0.115405	-0.115138	6.9996	6.57103	-1.49484	-1.55948	0.164589	0.150999	0.840449	0.57149
102639_at	Chst2	0.0260065	-0.108802	6.67972	5.07896	0.370716	-1.03428	0.718269	0.326196	0.978573	0.722898
102640_at	NA	-0.0531606	-0.0545468	7.02412	6.19196	-0.606546	-0.772748	0.557126	0.458155	0.962028	0.7932
102641_at	Spi1	0.0130048	0.0792583	7.5183	7.17196	0.179038	0.581378	0.861339	0.574295	0.986536	0.855605
102642_at	Slc11a2	-0.185785	-0.181754	8.80274	7.62606	-2.15424	-2.73344	0.0555667	0.0216963	0.679653	0.280973
102643_at	Hoxa2	-0.0377026	0.0221064	6.93215	6.38653	-0.49694	0.331872	0.629541	0.747071	0.968918	0.928831
102644_at	Mdfic	-0.0343636	-0.0647994	7.71717	6.95658	-0.245777	-0.587931	0.810625	0.570061	0.983851	0.853383
102645_at	Eea1	0.0528244	0.237898	6.74367	6.29628	0.437903	1.44178	0.670389	0.180976	0.9746	0.611709
102646_at	Usp34	-0.211464	0.209687	6.06941	5.11218	-1.49259	1.24898	0.165168	0.241079	0.840449	0.66857
102647_g_at	Usp34	-0.067501	0.081948	9.50505	8.38253	-0.583655	0.637607	0.57186	0.538542	0.965979	0.835292
102648_at	Sftpd	-0.086647	0.0229619	5.74283	5.0614	-1.08239	0.169515	0.303472	0.868887	0.908464	0.968054
102649_s_at	NA	0.0548768	0.51796	7.13531	7.68825	0.580196	2.38506	0.574105	0.0390928	0.965979	0.352484
102650_at	Rgs11	-0.105984	-0.0977305	8.61139	7.61651	-1.21537	-1.33552	0.251024	0.212309	0.889115	0.639967
102651_at	Gck	-0.056887	0.641789	7.93297	9.71853	-0.653738	3.99534	0.527433	0.00271614	0.954047	0.100353
[truncated: 10,489 more rows]

## Sheet: Sheet1
kidney	kidney	kidney	kidney	kidney	kidney	kidney	liver	liver	liver	liver	liver	liver	liver
ID	GeneName	logFC(FlightHardwareInSpaceK/FlightHardwareOnGroundK)	AveExpr	t	P.Value	adj.P.Val	ID	GeneName	logFC(FlightHardwareInSpaceL/FlightHardwareOnGroundL)	AveExpr	t	P.Value	adj.P.Val
101979_at	Gadd45g	2.0567	8.89382	18.9049	2.08613e-09	2.60516e-05	101103_at	Cyp4a14	1.90173	10.3104	18.4173	7.54341e-09	9.42021e-05
92820_at	Usp2	1.27977	10.1941	16.2336	9.73454e-09	5.70533e-05	93573_at	Mt1	3.36477	11.4767	16.2504	2.44258e-08	0.000152515
93284_at	Cirbp	1.68666	8.43229	15.4214	1.63007e-08	5.70533e-05	160092_at	Ifrd1	1.86258	5.17554	15.3627	4.12645e-08	0.00017177
93094_at	Cdr2	1.49493	8.52813	14.9801	2.1801e-08	5.70533e-05	94297_at	Fkbp5	1.97541	8.86921	13.5883	1.28759e-07	0.000314778
92202_g_at	Zbtb16	2.88994	7.39895	14.9103	2.28432e-08	5.70533e-05	100708_at	NA	1.65249	9.98288	13.446	1.41882e-07	0.000314778
103460_at	Ddit4	2.02261	8.15792	13.6499	5.50548e-08	0.00010224	101561_at	Mt2	3.34329	11.4754	13.1592	1.73023e-07	0.000314778
96083_s_at	Hnrnpdl	0.95125	9.07433	13.3413	6.90533e-08	0.00010224	104342_i_at	Pla2g12a	0.951515	5.50634	13.1313	1.76445e-07	0.000314778
99535_at	Ccrn4l	1.99895	8.56919	13.2146	7.58898e-08	0.00010224	98067_at	Cdkn1a	1.39262	9.06159	12.4604	2.85403e-07	0.000445514
92821_at	Usp2	1.34198	9.71134	13.1784	7.79764e-08	0.00010224	96041_at	NA	1.27654	7.56326	12.1068	3.71203e-07	0.000515064
101561_at	Mt2	1.5238	11.126	13.1136	8.18702e-08	0.00010224	94881_at	Cdkn1a	2.71914	9.09537	11.8969	4.35299e-07	0.000543602
97890_at	Sgk1	1.19203	9.7679	12.6612	1.15732e-07	0.000131388	103794_i_at	Timd2	-1.59474	6.28033	-11.6501	5.26644e-07	0.000597885
98892_at	Lpin1	1.30609	8.38368	12.4038	1.41625e-07	0.000147384	93294_at	Ctgf	1.48198	5.37951	10.796	1.04757e-06	0.00102592
104213_at	Upp2	1.08491	7.66792	12.1324	1.75949e-07	0.00016623	96348_at	Pnpla2	0.929336	9.7334	10.6529	1.18096e-06	0.00102592
94881_at	Cdkn1a	1.61531	8.81973	12.0613	1.86357e-07	0.00016623	101979_at	Gadd45g	2.45404	8.2858	10.6016	1.23314e-06	0.00102592
93573_at	Mt1	1.32341	11.1926	11.0356	4.42502e-07	0.000368398	96825_at	Tenc1	0.903249	7.50621	10.584	1.25166e-06	0.00102592
94297_at	Fkbp5	1.26636	8.83027	10.8268	5.32171e-07	0.000404939	100010_at	Klf3	0.921569	8.18019	10.4937	1.35151e-06	0.00102592
95057_at	Herpud1	1.06466	9.97269	10.7873	5.51246e-07	0.000404939	102763_at	Plin4	1.17433	5.97881	10.4553	1.39659e-06	0.00102592
96829_at	Wbp1l	0.864445	9.55358	10.6289	6.3563e-07	0.000440986	161609_at	Rgs16	1.65921	8.01069	10.362	1.51301e-06	0.00104969
161013_f_at	Spsb1	0.981834	6.34373	10.3614	8.1177e-07	0.000533546	160547_s_at	Txnip	1.90792	9.22191	10.252	1.66435e-06	0.0010829
92925_at	Cebpb	1.56792	8.30484	10.0195	1.11846e-06	0.000698364	93284_at	Cirbp	1.29978	7.83862	10.2047	1.73431e-06	0.0010829
99032_at	Rasd1	0.867425	6.99669	9.06534	2.87626e-06	0.00163131	100565_at	Gnpda1	-0.723389	6.93874	-9.9875	2.10026e-06	0.00117318
95731_at	Sesn1	1.28132	8.05847	9.02329	3.00393e-06	0.00163131	99628_at	Srsf5	1.08898	8.56964	9.9458	2.17976e-06	0.00117318
100708_at	NA	1.06416	10.5155	9.02311	3.0045e-06	0.00163131	94378_at	Rgs16	1.67473	9.90751	9.93811	2.19478e-06	0.00117318
93728_at	Tsc22d1	0.992738	10.0908	8.89642	3.4279e-06	0.00178365	103795_f_at	Timd2	-0.978406	8.10633	-9.908	2.25467e-06	0.00117318
93619_at	Per1	1.00856	7.83048	8.56703	4.86352e-06	0.00242942	95024_at	Usp18	0.969858	7.1901	9.84645	2.38276e-06	0.00118047
92830_s_at	Zfp36	0.850722	9.1378	8.18505	7.39408e-06	0.00355144	96146_at	NA	0.896082	5.82132	9.81207	2.45773e-06	0.00118047
101554_at	Nfkbia	0.945627	9.81555	7.85627	1.07322e-05	0.00496382	92830_s_at	Zfp36	0.924036	9.13729	9.63291	2.89273e-06	0.00130235
103989_at	Prdm5	0.739818	6.47627	7.74025	1.22738e-05	0.0054741	96573_at	Actg1	1.57805	10.2282	9.62266	2.92006e-06	0.00130235
100555_at	Rcan1	-0.66644	9.23489	-7.63918	1.38129e-05	0.0059481	94346_at	Wtap	0.820287	4.40609	9.56609	3.07597e-06	0.00132458
99628_at	Srsf5	0.819825	8.72251	7.35855	1.92905e-05	0.00802998	95135_at	Mid1ip1	-2.36684	8.72989	-9.49584	3.28243e-06	0.00136637
98569_at	Slc25a25	0.713633	10.0109	7.23044	2.25358e-05	0.00907827	99019_at	Por	1.27312	9.76566	9.43757	3.46519e-06	0.00139591
101553_at	Fga	0.728951	7.83454	7.09647	2.65699e-05	0.0103689	94490_at	Cnot8	-0.520061	6.81011	-9.17857	4.42363e-06	0.00172632
96825_at	Tenc1	0.759008	7.95358	7.04968	2.81571e-05	0.0104136	161666_f_at	Gadd45b	2.50254	5.78481	9.06739	4.92104e-06	0.00186224
160275_at	Msrb1	0.656383	10.2522	7.04412	2.83522e-05	0.0104136	96841_at	Pim3	1.45341	8.97272	8.94914	5.51799e-06	0.00202672
96841_at	Pim3	0.956158	10.6537	6.76368	4.0376e-05	0.0144062	95518_at	Fam134b	1.57016	9.66458	8.86384	5.99764e-06	0.00209713
98507_at	Nr1d1	0.751471	8.28001	6.72784	4.22714e-05	0.0146635	160379_at	Epb4.1	1.05766	7.83523	8.85573	6.04554e-06	0.00209713
94689_at	Rbm39	0.917925	8.24415	6.65764	4.62678e-05	0.015616	103409_at	Baiap2l1	0.99291	8.0027	8.68162	7.18207e-06	0.00239944
96340_at	Tmem50b	-0.472905	9.18146	-6.59654	5.00784e-05	0.0162297	103334_at	Crcp	0.761737	6.8208	8.66512	7.30129e-06	0.00239944
98067_at	Cdkn1a	0.845352	9.00457	6.58727	5.06852e-05	0.0162297	98451_at	Dnajb2	-1.13605	7.01808	-8.59122	7.86261e-06	0.00246094
93527_at	Klf9	0.742054	8.45511	6.51847	5.54458e-05	0.0173102	99503_at	NA	1.47797	8.73491	8.5887	7.88257e-06	0.00246094
95759_at	Pagr1a	-0.593416	7.84499	-6.38413	6.61844e-05	0.0201588	160397_at	Ik	1.01771	5.52595	8.49036	8.70599e-06	0.00265172
103907_at	Nedd4l	0.460792	8.6294	6.36575	6.78194e-05	0.020165	94813_at	Gas1	-1.14483	7.45094	-8.23379	1.13312e-05	0.00336915
94929_at	Ptpn1	0.538878	9.48036	6.16945	8.82599e-05	0.0246945	94928_at	Tnfrsf1b	0.77839	7.30762	8.1661	1.21599e-05	0.00353147
98150_at	Rab11b	0.46269	9.5491	6.16443	8.88617e-05	0.0246945	97197_r_at	AI506816	1.67739	9.41185	8.02484	1.41107e-05	0.00400488
161817_f_at	Spsb1	0.928361	6.26545	6.15689	8.97756e-05	0.0246945	94440_at	Slc25a47	1.49346	11.3275	7.96595	1.50225e-05	0.00409902
160600_at	Gm17066	-0.553819	5.03944	-6.14501	9.12356e-05	0.0246945	160829_at	Phlda1	-1.69805	8.48295	-7.96119	1.50989e-05	0.00409902
94286_at	Smim7	0.686174	7.03989	6.13139	9.29405e-05	0.0246945	99603_g_at	Klf10	1.14352	7.65157	7.83715	1.72487e-05	0.00458301
104343_f_at	Pla2g12a	0.553261	9.94027	6.01907	0.000108374	0.0281952	94485_at	Eci2	1.17001	8.98699	7.77432	1.84628e-05	0.00475514
160330_at	Chordc1	-0.604058	8.9663	-5.9787	0.000114574	0.028523	93527_at	Klf9	0.859038	7.45522	7.76464	1.86581e-05	0.00475514
103050_at	Tcf21	-0.861258	7.69935	-5.96697	0.000116446	0.028523	103460_at	Ddit4	2.40844	7.68672	7.66468	2.08109e-05	0.00516458
93528_s_at	Klf9	0.706326	10.6187	5.96672	0.000116486	0.028523	96083_s_at	Hnrnpdl	1.04155	8.69935	7.63526	2.14948e-05	0.00516458
96041_at	NA	0.797508	8.83469	5.88547	0.000130393	0.0310586	160840_at	Arhgef3	0.90508	5.05904	7.63482	2.15053e-05	0.00516458
95665_at	Sec14l1	0.592729	8.47224	5.87769	0.000131815	0.0310586	160894_at	Cebpd	1.75319	7.78485	7.58832	2.26373e-05	0.00521565
102727_at	Bdnf	-0.610418	5.96653	-5.86294	0.000134556	0.0311172	95050_at	Chordc1	-0.611254	8.0553	-7.57946	2.28603e-05	0.00521565
104598_at	Dusp1	1.19497	9.27951	5.8032	0.000146301	0.0332183	96806_at	Lpin2	0.904797	8.29775	7.5751	2.29709e-05	0.00521565
101465_at	Stat1	-0.47547	4.55134	-5.78214	0.000150699	0.033606	99096_at	Ddx24	0.546898	6.26742	7.53468	2.40244e-05	0.00535745
100138_f_at	Rbm14	-0.511799	7.11624	-5.70015	0.00016922	0.037074	95606_at	Syncrip	0.561231	4.12596	7.49468	2.51191e-05	0.00550328
97254_at	Rbm8a	0.587746	7.86162	5.68645	0.000172545	0.0371506	101007_at	Mknk2	0.60758	9.05855	7.39217	2.81798e-05	0.00604873
94662_at	4833441D16Rik	0.640352	7.92217	5.65448	0.000180579	0.0382216	104340_at	Mbd1	0.778778	7.06305	7.37975	2.85774e-05	0.00604873
98594_at	1190002N15Rik	-0.597075	6.31169	-5.6354	0.000185562	0.0386216	94439_at	Osbpl11	1.48063	5.79402	7.30322	3.11658e-05	0.00631687
103995_at	Fgfbp1	0.401392	5.48902	5.59327	0.000197099	0.0403503	101088_f_at	Cnbp	0.609965	9.26368	7.27504	3.21824e-05	0.00631687
93521_at	Srrm1	0.426285	8.91551	5.57329	0.000202834	0.0408547	96771_at	Erbb3	-0.74918	9.478	-7.27266	3.22697e-05	0.00631687
160850_at	Fpgs	0.486826	9.66475	5.51253	0.0002214	0.0438865	96614_at	4933426M11Rik	1.10559	8.32546	7.27243	3.22783e-05	0.00631687
99980_at	Hoxc6	-0.498742	6.98771	-5.48457	0.000230544	0.044474	100011_at	Klf3	1.04658	7.81755	7.25247	3.30222e-05	0.00631687
104408_s_at	Sox18	-0.859907	7.51378	-5.48176	0.000231487	0.044474	95759_at	Pagr1a	-0.601069	7.50997	-7.25157	3.30561e-05	0.00631687
95465_s_at	Tmem37	0.748139	10.8003	5.46296	0.00023789	0.044487	100899_s_at	Zbtb22	0.497883	7.49381	7.24291	3.33851e-05	0.00631687
103379_at	Fbxo3	0.547027	7.04765	5.46068	0.000238679	0.044487	101004_f_at	Srsf3	1.08262	6.12603	7.13751	3.76874e-05	0.00684095
96564_at	Hspa8	-0.585529	9.81068	-5.44209	0.00024522	0.045034	104410_at	Midn	0.945579	8.76438	7.12543	3.82177e-05	0.00684095
103081_at	Baz1b	-0.503478	8.87607	-5.4247	0.000251513	0.0455201	160632_at	Prkd3	-1.10464	6.85327	-7.11879	3.85128e-05	0.00684095
98447_at	Cebpa	-0.588302	9.23106	-5.40459	0.000259003	0.0462062	98596_s_at	St3gal5	1.52432	10.2049	7.11644	3.86178e-05	0.00684095
160840_at	Arhgef3	0.517528	6.14383	5.39183	0.000263881	0.0464134	102027_s_at	NA	0.464515	9.60888	7.11029	3.88939e-05	0.00684095
98909_at	Lias	0.595563	8.28892	5.33367	0.000287384	0.0498452	92658_at	Foxq1	-0.621917	7.31174	-7.05123	4.16585e-05	0.00708247
94509_at	Ncbp2	-0.502306	5.96835	-5.29799	0.000302899	0.0500505	103065_at	Slc20a1	0.995901	6.86009	7.04915	4.17599e-05	0.00708247
96656_at	Wdr48	-0.53278	7.60518	-5.29559	0.000303974	0.0500505	103875_at	Ngrn	-0.758053	6.98225	-7.04488	4.19685e-05	0.00708247
104250_at	Lrrc8a	0.428941	8.31929	5.29034	0.000306339	0.0500505	93914_at	Il1r1	0.98266	7.22316	7.0153	4.34446e-05	0.00723382
99187_f_at	Use1	0.407845	8.14564	5.28652	0.00030807	0.0500505	96338_at	Egln2	0.566258	8.82187	6.99823	4.4322e-05	0.00728281
104437_at	Zfp30	-0.424788	5.95936	-5.28285	0.000309748	0.0500505	93066_at	Grn	0.828947	9.29589	6.9527	4.67575e-05	0.00758322
92806_at	Pdrg1	-0.47223	8.63883	-5.27662	0.000312615	0.0500505	103685_at	Pag1	1.12071	5.77425	6.93157	4.79368e-05	0.00767481
98849_at	NA	-0.487996	6.50557	-5.25327	0.000323616	0.0510617	162482_at	Traf4	-0.524956	8.68142	-6.89059	5.03175e-05	0.00795399
102736_at	Ccl2	-1.10282	5.92146	-5.24583	0.000327206	0.0510617	94303_at	Hnrnpd	0.76329	7.88695	6.83833	5.35409e-05	0.00835774
92746_at	Nat2	0.5298	5.96345	5.23766	0.000331198	0.0510617	104213_at	Upp2	1.57433	11.0171	6.80834	5.54917e-05	0.00855532
160469_at	NA	-0.766888	6.36614	-5.20157	0.000349462	0.0532205	102399_at	Rbpms	0.567534	7.27884	6.75666	5.90363e-05	0.00878217
100126_at	Chrac1	0.507373	8.24911	5.1682	0.000367305	0.0547821	102049_at	Pdk4	0.958485	7.54074	6.75647	5.90494e-05	0.00878217
94214_at	Fabp3	0.588673	8.55143	5.16604	0.000368489	0.0547821	96272_at	Ptprf	-0.41133	8.80312	-6.75614	5.90729e-05	0.00878217
160617_at	Klf13	0.777499	8.65406	5.12436	0.000392235	0.0576262	104745_at	Atl2	1.17037	8.4343	6.74591	5.9804e-05	0.00878626
97859_at	Inpp5a	0.408967	8.04995	5.11126	0.000400026	0.0580875	92542_at	Rsrp1	-1.20939	9.1353	-6.72747	6.11463e-05	0.00887901
103660_at	Pex11a	0.54807	9.59981	5.07485	0.000422566	0.0606552	162224_r_at	Aplp2	-0.52833	5.45314	-6.68189	6.46057e-05	0.0091769
99620_at	Sfpq	-0.586008	4.75326	-5.03778	0.000446901	0.0629352	162486_f_at	Dscr3	-0.425389	7.21611	-6.67657	6.50237e-05	0.0091769
160261_i_at	Lats2	-0.660784	9.43006	-5.02901	0.000452878	0.0629352	102828_at	Map2k6	0.614343	4.8867	6.67177	6.54023e-05	0.0091769
100565_at	Gnpda1	-0.840909	8.56128	-5.028	0.000453569	0.0629352	103581_at	Acot1	1.46378	7.99799	6.613	7.02447e-05	0.00974685
93500_at	Alas1	0.41192	10.5198	5.00577	0.000469121	0.0632037	160330_at	Chordc1	-0.740191	8.42009	-6.55516	7.53913e-05	0.0102158
160547_s_at	Txnip	0.576338	10.6658	5.00498	0.000469685	0.0632037	103443_at	Aim1	0.691101	8.00785	6.54127	7.66866e-05	0.0102158
94419_at	Slc19a1	0.402533	9.35723	5.00357	0.000470687	0.0632037	92558_at	Vcam1	1.50915	5.81847	6.5398	7.68259e-05	0.0102158
92542_at	Rsrp1	-0.897733	9.19607	-4.98266	0.000485885	0.0645503	103892_r_at	Ell2	0.997795	6.83552	6.53905	7.68965e-05	0.0102158
104149_at	Nfkbia	0.597856	8.76911	4.94921	0.000511296	0.0672112	96701_at	Uba2	0.581838	6.72601	6.4875	8.19358e-05	0.0107707
98367_at	Hoxd3	-0.430938	5.70425	-4.93067	0.000525979	0.0684211	96119_s_at	Angptl4	1.45722	8.42634	6.47058	8.36666e-05	0.0108492
104030_at	Ptch1	-0.398322	6.6919	-4.88112	0.000567465	0.0727757	93867_at	Abcd4	0.590376	6.69464	6.46477	8.42706e-05	0.0108492
161666_f_at	Gadd45b	0.563531	6.23518	4.87519	0.000572655	0.0727757	98923_at	Rcl1	0.917187	9.57992	6.45249	8.55613e-05	0.010903
102401_at	Irf1	-0.400595	8.34749	-4.86714	0.000579788	0.0727757	92562_at	Nfe2l2	-0.880696	7.88655	-6.41913	8.91783e-05	0.0112491
97808_at	Sf3b1	0.431207	8.87633	4.86381	0.000582765	0.0727757	92958_at	Foxo3	0.556575	7.81776	6.39125	9.23287e-05	0.01132
97329_at	Ints3	-0.475904	7.24644	-4.80159	0.000641472	0.0785081	95914_at	Dido1	0.73641	5.32321	6.38763	9.27463e-05	0.01132
92562_at	Nfe2l2	-0.590853	8.82747	-4.79737	0.00064568	0.0785081	102001_at	Rrm2	0.639677	5.1744	6.38267	9.33223e-05	0.01132
96295_at	Psat1	0.758669	8.11108	4.79405	0.000649006	0.0785081	98137_at	Car5a	-0.753937	9.20842	-6.38049	9.35758e-05	0.01132
94813_at	Gas1	-0.49475	8.23475	-4.78928	0.000653815	0.0785081	92855_at	NA	0.781041	10.2515	6.37454	9.42731e-05	0.01132
99027_at	Bcl2l1	0.390595	9.53442	4.77622	0.00066718	0.07935	101062_at	Hmox2	0.769561	6.60099	6.35187	9.69845e-05	0.0114153
95050_at	Chordc1	-0.498367	8.65597	-4.74386	0.000701564	0.0826208	96592_at	Pik3r1	0.644552	6.79237	6.35053	9.71465e-05	0.0114153
97906_at	Siah2	-0.342679	7.80632	-4.73807	0.000707914	0.0826208	102761_at	Grpel2	0.95922	7.04975	6.33796	9.86893e-05	0.0114153
96104_at	Rnf145	-0.408505	8.52282	-4.72818	0.000718901	0.0831262	160124_r_at	Atp6v1c1	0.536848	6.91987	6.33769	9.87228e-05	0.0114153
104731_at	Zfp467	-0.455781	6.71117	-4.72012	0.00072798	0.0834039	104343_f_at	Pla2g12a	1.2768	8.61802	6.30741	0.000102549	0.0117468
96084_at	Hnrnpdl	0.600227	7.09283	4.70878	0.00074097	0.0834899	95659_at	Actl6a	0.436391	5.63419	6.30029	0.000103471	0.0117468
103906_f_at	Nedd4l	0.413695	9.29648	4.7078	0.000742103	0.0834899	160099_at	Lgals4	0.537095	6.93113	6.25773	0.000109177	0.0122828
96288_at	Prrc1	0.389896	7.5591	4.68502	0.000768979	0.0857412	94689_at	Rbm39	1.11971	7.61808	6.22468	0.000113843	0.0126913
92276_at	Map3k6	0.352435	7.76608	4.67601	0.000779897	0.086189	93521_at	Srrm1	0.504893	8.47693	6.21075	0.000115873	0.0126913
162384_f_at	Ccrn4l	0.563338	4.29782	4.65216	0.000809581	0.0879545	99602_at	Klf10	1.22348	8.17924	6.19093	0.00011883	0.0126913
160832_at	Ldlr	0.408086	8.14058	4.65186	0.000809959	0.0879545	102401_at	Irf1	-0.731705	8.26331	-6.19058	0.000118883	0.0126913
98473_at	Arg2	0.632244	8.03788	4.64258	0.000821838	0.0884751	102204_at	Mafb	0.905385	7.006	6.18683	0.000119452	0.0126913
93467_at	Cachd1	-0.429808	8.48239	-4.62481	0.000845102	0.0891619	102850_at	Tnk2	0.613237	7.1579	6.16843	0.000122286	0.0126913
99188_at	Use1	0.464835	9.21934	4.62262	0.000848016	0.0891619	93950_at	Foxa2	-0.64645	8.54721	-6.16556	0.000122735	0.0126913
103445_at	Hoxb6	-0.449971	9.1791	-4.62141	0.000849637	0.0891619	100094_at	Supt5	0.718371	7.82224	6.16534	0.00012277	0.0126913
103716_at	Cep350	-0.562731	7.3879	-4.60478	0.000872164	0.0907632	104268_at	Il6ra	1.29929	9.20942	6.16496	0.000122829	0.0126913
92958_at	Foxo3	0.809123	8.65274	4.59317	0.000888266	0.0915264	95722_at	Glrx	0.75415	8.6691	6.16406	0.00012297	0.0126913
160246_at	Tnfaip8	-0.948177	9.03339	-4.58898	0.000894156	0.0915264	102829_s_at	Map2k6	0.45051	5.29433	6.14815	0.000125495	0.0127722
92777_at	Cyr61	-0.629219	6.57759	-4.53953	0.000966838	0.0981616	96298_f_at	Dynll1	-0.519025	8.72938	-6.14625	0.0001258	0.0127722
160092_at	Ifrd1	0.669782	5.50301	4.53403	0.000975291	0.0982212	93316_at	Osbpl1a	0.470505	8.63733	6.13273	0.000127996	0.0128904
103726_at	Yipf5	-0.501139	7.67762	-4.52262	0.000993097	0.0992144	95701_at	Cxxc5	-0.709797	7.6899	-6.12618	0.000129073	0.0128949
95681_f_at	Ppp1r2	0.321827	6.52316	4.50591	0.0010198	0.100757	97869_at	Etfdh	0.545837	9.0051	6.11631	0.000130716	0.0129554
100711_at	Rpl10a	0.459592	11.0539	4.5029	0.00102468	0.100757	94286_at	Smim7	0.854373	6.55786	6.10785	0.000132144	0.0129938
94303_at	Hnrnpd	0.456983	8.22245	4.46811	0.00108301	0.105661	104598_at	Dusp1	1.20513	9.68412	5.94514	0.000163125	0.0158292
93975_at	Errfi1	0.956801	10.406	4.46035	0.00109649	0.106147	101030_at	Rhob	0.777891	8.62727	5.94331	0.000163515	0.0158292
104754_at	Srsf4	0.423995	8.04463	4.44888	0.00111676	0.107277	103098_at	Baiap2	0.470994	8.42964	5.93274	0.000165787	0.0159258
161083_at	Taok3	-0.320226	6.10887	-4.42711	0.00115628	0.110226	92202_g_at	Zbtb16	1.99681	8.38711	5.91378	0.000169952	0.0161441
94302_at	Psmd4	0.399055	9.60334	4.40553	0.00119692	0.113236	102779_at	Gadd45b	0.936792	8.15636	5.90967	0.000170868	0.0161441
100899_s_at	Zbtb22	0.48908	7.50215	4.34955	0.00130953	0.122958	103693_at	Tirap	-0.646701	5.53789	-5.90491	0.000171939	0.0161441
101836_at	Ppm1b	0.362548	5.4862	4.33392	0.00134292	0.12472	93974_at	Errfi1	1.22797	10.5784	5.88005	0.000177641	0.0165551
92903_at	Tfap2b	-0.406505	7.46156	-4.33145	0.00134827	0.12472	93342_at	Nifk	0.480438	5.01787	5.80834	0.000195264	0.0180626
161214_r_at	BC037034	-0.663998	6.92384	-4.31772	0.00137848	0.126577	98926_at	Vamp2	0.462396	7.44613	5.7954	0.00019864	0.0181242
99416_at	Osbpl9	0.427297	7.27191	4.29333	0.00143388	0.130703	92638_at	Ppp2ca	0.942668	5.14759	5.79468	0.000198832	0.0181242
160103_at	March7	0.571635	7.67231	4.2872	0.00144818	0.13105	92277_at	Myo1e	0.648388	5.70326	5.77358	0.000204477	0.0185037
99778_at	Rpl12	0.348	8.11182	4.25453	0.00152692	0.137181	93013_at	Id2	-0.723417	10.2945	-5.7595	0.000208342	0.0187178
95027_at	Usp21	-0.277112	7.90061	-4.23723	0.00157041	0.14008	93432_at	Zfp276	0.596282	6.42446	5.73419	0.000215487	0.0192215
102893_at	Pou2f1	0.311997	7.75832	4.21248	0.00163493	0.144802	103708_at	Eif1a	1.22357	7.25531	5.72457	0.000218272	0.0193318
160359_at	Rgcc	0.740812	8.08026	4.20552	0.00165355	0.145419	101104_at	Dscr3	-0.379345	8.18152	-5.70887	0.0002229	0.0193475
97486_at	U2af1	0.512928	8.72282	4.19868	0.00167208	0.145557	97704_at	Ell2	0.414037	5.03397	5.70872	0.000222944	0.0193475
94382_at	1110057K04Rik	-0.353605	6.84986	-4.19227	0.00168966	0.145557	101998_at	4833420G17Rik	0.482454	6.31567	5.70821	0.000223097	0.0193475
96594_at	Hspa4	-0.556761	9.28537	-4.19212	0.00169008	0.145557	97410_at	Slc25a51	0.554599	8.15052	5.68589	0.000229867	0.0197971
103562_f_at	NA	0.771096	8.71145	4.16998	0.00175226	0.149878	97918_at	Rell1	1.0171	7.04072	5.6587	0.000238413	0.0203925
160227_s_at	Bysl	-0.320322	7.37025	-4.16132	0.00177724	0.150981	104287_at	Senp3	0.336403	7.91976	5.62119	0.000250772	0.0211997
103063_at	Zfp62	-0.548563	5.15466	-4.15682	0.00179037	0.151068	104646_at	Gdf15	0.583688	7.76419	5.61979	0.000251245	0.0211997
97824_at	Nhp2	0.470266	9.57661	4.1514	0.00180632	0.151391	102026_s_at	NA	0.588259	6.41718	5.59832	0.000258641	0.0215785
102919_at	Mafk	0.36803	8.17709	4.13873	0.00184416	0.153533	104257_g_at	Cytip	0.744207	6.94298	5.59359	0.000260302	0.0215785
160462_f_at	Tubb3	0.387084	9.01495	4.11378	0.00192118	0.158202	100151_at	Serinc3	0.628786	9.55521	5.59108	0.000261187	0.0215785
104340_at	Mbd1	0.501447	7.3391	4.11238	0.00192558	0.158202	92374_at	Adora1	0.66093	5.42458	5.58697	0.000262647	0.0215785
162113_r_at	Vamp7	-0.388203	7.01733	-4.10606	0.00194566	0.158806	160362_at	Mat2a	0.480654	8.10032	5.44653	0.000318116	0.0257407
100985_at	Siah1a	0.378971	7.80674	4.08944	0.00199953	0.161262	99849_at	Wdr92	0.850824	11.2478	5.44401	0.00031922	0.0257407
98101_at	Gtf2a2	0.394	7.853	4.08133	0.00202636	0.161262	97527_at	Cks2	-0.92695	7.21214	-5.4416	0.000320277	0.0257407
102049_at	Pdk4	1.34069	9.04783	4.07641	0.00204284	0.161262	92805_s_at	Arl4a	0.454636	8.60352	5.43871	0.000321552	0.0257407
96254_at	Dnajb1	-0.280977	7.47694	-4.07472	0.00204854	0.161262	161466_r_at	Asb3	-0.491131	5.70869	-5.40896	0.000335005	0.0266468
99498_at	NA	0.338243	5.91589	4.0739	0.00205129	0.161262	94433_at	Slc38a2	1.85804	7.99283	5.39213	0.000342879	0.0271005
104576_at	Ski	-0.384998	8.92416	-4.07205	0.00205755	0.161262	103483_at	Ercc5	0.445361	6.21306	5.38628	0.000345661	0.0271485
160829_at	Phlda1	-0.596196	6.25241	-4.06952	0.00206614	0.161262	94454_at	NA	0.524754	9.16246	5.36652	0.000355249	0.027708
160265_at	Eif5	0.501547	8.76258	4.05647	0.00211103	0.163222	161836_r_at	Zhx1	-0.593446	7.23756	-5.36252	0.000357222	0.027708
96146_at	NA	0.575974	8.16735	4.05133	0.00212901	0.163222	103646_at	Crat	0.487023	7.83179	5.3429	0.00036708	0.0282969
102668_at	Ppara	0.600545	9.63495	4.05073	0.00213113	0.163222	100138_f_at	Rbm14	-0.417607	6.3978	-5.32076	0.000378554	0.0288508
93084_at	Slc25a4	0.381264	11.308	4.04721	0.00214353	0.163222	92925_at	Cebpb	2.1387	9.61391	5.32013	0.000378887	0.0288508
95564_at	Ccdc117	-0.441576	5.26935	-4.0377	0.00217742	0.164124	98402_at	Macf1	0.431225	8.26422	5.31017	0.000384181	0.0290767
160164_at	Ube2v1	0.356545	9.49767	4.03652	0.00218166	0.164124	98084_at	Arl2bp	0.527502	8.30983	5.30067	0.000389301	0.0291726
102425_at	Tle1	-0.341907	4.80207	-4.02935	0.00220765	0.164767	93376_at	Bmp2k	0.423401	4.18942	5.29917	0.00039012	0.0291726
98766_at	Sh3bp5	0.430966	6.99462	4.02402	0.00222717	0.164767	98322_at	Slc22a5	0.413072	6.45139	5.27617	0.000402856	0.0299336
161836_r_at	Zhx1	-0.481659	7.78176	-4.02331	0.00222978	0.164767	93559_at	Apex1	0.484424	7.45007	5.26996	0.000406371	0.0299336
95456_r_at	Shfm1	0.320714	10.2126	4.00253	0.00230775	0.169525	94418_at	Elovl6	-1.55547	8.5272	-5.26404	0.000409751	0.0299336
101440_at	Macrod2	-0.321261	7.0246	-3.9982	0.00232432	0.169744	93178_at	Ngef	-0.510227	8.7664	-5.26122	0.000411374	0.0299336
98937_at	Tbrg1	0.47052	8.44155	3.99063	0.00235367	0.170888	104754_at	Srsf4	0.457728	7.77035	5.25655	0.000414071	0.0299336
92638_at	Ppp2ca	0.337939	4.96969	3.97434	0.00241809	0.17455	95886_g_at	Crebbp	0.559982	8.15549	5.2555	0.000414679	0.0299336
103975_at	Grem2	0.394941	6.32634	3.97025	0.00243455	0.174728	95501_at	Rtfdc1	0.844834	7.13683	5.23629	0.000426006	0.0304522
104263_at	NA	-0.48729	6.72937	-3.96514	0.00245528	0.175209	92820_at	Usp2	0.933867	8.57298	5.2318	0.000428704	0.0304522
160101_at	Hmox1	0.421125	9.66718	3.95073	0.0025147	0.178429	103267_i_at	NA	-0.382696	7.1663	-5.23101	0.000429179	0.0304522
98038_at	Hmgb3	0.304918	9.89951	3.93773	0.00256964	0.181297	92736_at	Slc7a2	0.379798	8.44595	5.21635	0.000438116	0.0309097
161077_f_at	NA	-0.271718	8.30164	-3.93264	0.00259149	0.181812	95134_at	Mid1ip1	-0.745683	7.91549	-5.21185	0.000440901	0.0309097
101086_f_at	Cnbp	0.557609	9.54432	3.92716	0.00261523	0.182452	98038_at	Hmgb3	0.517252	8.31327	5.20839	0.000443052	0.0309097
93974_at	Errfi1	1.00219	9.65629	3.92072	0.00264339	0.183392	102047_at	Nmt1	0.509677	7.87505	5.19121	0.000453905	0.0313248
97161_at	Sfpq	-0.286295	4.23699	-3.91654	0.00266187	0.183457	95695_at	Slc25a20	0.468568	9.5595	5.19104	0.000454019	0.0313248
160388_at	Msmo1	0.562363	6.56587	3.91388	0.0026737	0.183457	104645_at	Klf7	0.350345	6.07953	5.17877	0.000461948	0.0316711
101396_at	Hnf1b	-0.4822	8.14529	-3.91003	0.00269089	0.183627	104047_at	Mapk8	0.586857	7.29288	5.17546	0.00046411	0.0316711
103467_g_at	Cyhr1	0.284389	8.28119	3.8894	0.00278506	0.188873	160384_at	Ddx39b	0.574253	8.39788	5.16507	0.000470982	0.0319653
95937_at	NA	-0.343772	7.07999	-3.88662	0.00279801	0.188873	102332_at	Ulk1	0.757779	8.52915	5.15411	0.000478337	0.0322891
101995_at	Sqstm1	0.365979	10.0798	3.88131	0.00282294	0.188901	103665_at	Elovl6	-1.59786	9.18867	-5.11921	0.000502613	0.0337454
104568_at	Kmt2a	-0.353225	8.30486	-3.88009	0.00282868	0.188901	97935_at	Msl1	-0.30564	7.24273	-5.10414	0.000513503	0.0342921
96755_at	Etf1	0.368895	9.449	3.85094	0.00296993	0.197279	96886_at	Stab1	0.576634	7.74864	5.09737	0.000518472	0.0344398
98999_at	Adsl	0.321027	7.46355	3.84296	0.00300983	0.198789	93320_at	Cpt1a	0.646112	10.5324	5.07238	0.000537281	0.0354025
104090_at	Cdc23	-0.359431	6.4395	-3.83828	0.00303352	0.198789	92697_at	Foxa1	-0.809243	5.59865	-5.07061	0.000538636	0.0354025
93666_at	Lmo2	-0.288744	7.9533	-3.83547	0.00304785	0.198789	102114_f_at	Angptl4	1.05701	8.73019	5.06329	0.000544302	0.0355396
95536_at	Tceb3	-0.281824	7.77075	-3.8338	0.00305634	0.198789	103007_at	Efna1	-0.634619	7.35916	-5.06058	0.000546412	0.0355396
96119_s_at	Angptl4	0.732121	7.84543	3.82874	0.0030824	0.199043	103896_f_at	Igfbp1	2.8093	9.50928	5.04051	0.000562328	0.036098
100343_f_at	Tuba1a	0.38952	10.2063	3.82686	0.00309211	0.199043	104627_at	Cds2	-0.488842	7.163	-5.03905	0.000563504	0.036098
93086_at	NA	-0.787528	8.63263	-3.80774	0.00319284	0.203775	103660_at	Pex11a	0.883322	9.61205	5.03884	0.00056367	0.036098
92571_at	Hspa4	0.386051	6.4083	3.80361	0.00321509	0.203775	97420_at	Lrg1	0.6621	11.1242	5.01971	0.000579345	0.0369126
160651_at	Tacstd2	0.615613	8.67778	3.80321	0.00321724	0.203775	93528_s_at	Klf9	1.00227	9.8823	4.99669	0.000598826	0.0379601
92990_at	Zfp93	-0.274448	6.73228	-3.80068	0.0032309	0.203775	160493_at	Cd63	0.431548	6.274	4.99217	0.000602735	0.0380149
102123_at	Lipa	-0.70697	8.66899	-3.7831	0.00332774	0.206892	98353_at	NA	0.625477	7.92279	4.97966	0.000613692	0.0385115
102894_g_at	Pou2f1	0.291342	7.90169	3.78041	0.00334285	0.206892	100499_at	Stx3	0.341638	4.82728	4.96102	0.000630412	0.0391702
104569_at	Kmt2a	-0.449603	8.3781	-3.78016	0.00334424	0.206892	104605_at	Adipor2	-0.538503	10.6793	-4.96097	0.000630461	0.0391702
94948_at	Trip6	0.272076	8.7765	3.77974	0.00334659	0.206892	92821_at	Usp2	0.72933	7.2731	4.9516	0.00063905	0.0395072
160727_at	2410002F23Rik	0.325996	8.5508	3.77674	0.00336355	0.206916	102328_at	Casp8	0.40404	5.73326	4.93832	0.000651436	0.039951
99506_at	Dapk2	-0.244576	8.23059	-3.7656	0.00342716	0.209655	95679_at	Cdk2ap2	-0.593792	8.86362	-4.93706	0.000652626	0.039951
104241_at	Mef2d	0.347285	9.33581	3.76272	0.00344378	0.209655	160434_at	Tmem9b	0.341698	7.17349	4.91737	0.000671508	0.0409063
98564_f_at	NA	0.379002	11.8257	3.7602	0.00345843	0.209655	96259_at	Npepps	-0.298086	7.28119	-4.91199	0.000676767	0.0410265
92408_at	NA	-0.566527	5.85999	-3.75442	0.00349226	0.210608	160088_at	Fmo5	0.667105	9.70328	4.90453	0.00068414	0.041145
93013_at	Id2	-0.549342	10.8069	-3.75176	0.00350797	0.210608	100737_at	Onecut1	-0.849091	7.58467	-4.90335	0.000685311	0.041145
103074_f_at	NA	0.456359	6.23429	3.74892	0.00352474	0.210608	92941_at	1110054M08Rik	-0.370986	7.30961	-4.89631	0.000692356	0.0413691
97848_at	Rbmx	-0.400194	5.4544	-3.73018	0.00363792	0.216335	92614_at	Id3	-0.904729	8.92178	-4.8923	0.000696396	0.0414124
103839_at	Sphk1	0.404828	7.25659	3.72401	0.00367597	0.216898	96778_at	Rrs1	0.460435	6.28006	4.88256	0.000706329	0.041804
100024_at	Shroom3	-0.607215	8.21623	-3.72302	0.00368212	0.216898	93625_at	Agxt	0.584365	10.1759	4.87064	0.000718692	0.0422378
96696_at	Prmt1	0.513999	7.72554	3.70056	0.00382445	0.224224	96693_at	Rars	0.417386	7.77702	4.86899	0.000720423	0.0422378
102380_s_at	Hoxd4	-0.359183	7.918	-3.69602	0.00385386	0.224893	103891_i_at	Ell2	1.16631	9.06024	4.86023	0.000729679	0.0425373
97498_at	Fhl1	0.444039	9.22594	3.67367	0.0040024	0.232474	104719_at	Slc12a7	-0.518179	7.67094	-4.85773	0.000732345	0.0425373
102048_at	Ankrd1	-0.435003	4.99255	-3.66834	0.00403868	0.233496	94246_at	Ets2	0.472372	7.06708	4.84928	0.000741436	0.042866
92255_at	Hoxb4	-0.253379	6.59909	-3.66113	0.00408831	0.234718	102315_at	Cirh1a	0.504546	6.40847	4.84352	0.000747697	0.0430288
99959_at	Ak4	-0.610932	8.56107	-3.65831	0.00410786	0.234718	102776_at	Usp38	0.4655	7.12575	4.83106	0.000761435	0.0434963
96883_at	Eif3g	0.406831	9.8256	3.65591	0.00412459	0.234718	160770_at	Mvd	-0.499696	7.34694	-4.82985	0.000762787	0.0434963
92769_at	Psmd3	0.496146	10.0672	3.65442	0.004135	0.234718	98083_at	Klf6	0.529289	5.97266	4.8254	0.000767769	0.0435814
94041_at	Hnrnpk	0.562413	6.88731	3.63792	0.00425232	0.240285	97838_at	Snhg1	0.564302	5.95696	4.82053	0.000773252	0.0436259
92201_at	Zbtb16	0.308366	7.70322	3.63001	0.00430978	0.241558	160511_at	Cxcl12	-0.43876	8.27027	-4.81852	0.00077554	0.0436259
160327_at	Dctn6	0.401993	8.22374	3.6295	0.00431353	0.241558	99442_at	Resp18	-0.333799	6.47042	-4.77892	0.000821927	0.0459052
94261_at	Thrap3	0.38951	10.1171	3.62578	0.00434083	0.242001	160345_at	Mrpl34	-0.700554	8.71984	-4.77769	0.000823411	0.0459052
160920_at	Bcl2l2	-0.339165	7.64731	-3.61299	0.00443617	0.246217	104250_at	Lrrc8a	0.511131	7.62548	4.77123	0.00083127	0.0461373
161763_r_at	Pip4k2c	-0.364407	8.10663	-3.60577	0.00449094	0.247602	160801_at	Pqlc1	-0.557196	9.17321	-4.7357	0.000875952	0.0481916
101062_at	Hmox2	0.263027	7.04751	3.60448	0.00450077	0.247602	160772_i_at	Slu7	0.322179	6.73091	4.73325	0.000879118	0.0481916
100547_at	Rbm4b	-0.256934	8.78615	-3.59828	0.00454851	0.249131	102207_at	Nrbp2	0.733259	7.64939	4.73268	0.000879859	0.0481916
93187_at	Trim47	-0.448748	8.91578	-3.59072	0.00460734	0.251251	104119_at	Fam13b	0.789834	6.78377	4.7248	0.000890162	0.048543
103688_at	Sowaha	-0.337636	5.25857	-3.58212	0.00467531	0.252688	160605_s_at	Usp38	0.55027	4.79755	4.71923	0.000897523	0.0486064
95706_at	Lgals3	0.573217	7.63739	3.57984	0.00469349	0.252688	161684_r_at	Lcn2	-0.331304	7.36627	-4.7178	0.000899423	0.0486064
103811_at	Invs	-0.293798	7.28826	-3.57972	0.0046944	0.252688	161951_f_at	Slc25a51	0.622004	7.20557	4.71511	0.000903003	0.0486064
99019_at	Por	0.395655	9.39454	3.57234	0.00475377	0.254532	100946_at	Hspa1b	-1.49756	6.07482	-4.70707	0.000913817	0.0489774
95387_f_at	Sema4b	0.377567	7.29686	3.57041	0.00476942	0.254532	97282_at	Mela	0.427302	7.04003	4.68206	0.000948316	0.0506093
93858_at	Cxcl10	-0.278176	4.61784	-3.56649	0.00480134	0.254791	95025_at	Tango2	0.428427	9.16668	4.67533	0.000957837	0.0508999
160958_at	9430016H08Rik	0.454572	6.84671	3.56482	0.00481508	0.254791	93619_at	Per1	0.517923	7.06527	4.67058	0.000964623	0.0509568
93978_at	B3galnt2	-0.277544	5.08064	-3.55839	0.00486812	0.255978	104089_at	Snhg5	0.778456	4.53606	4.66887	0.000967069	0.0509568
101014_at	Ifnar2	-0.378072	6.64889	-3.55714	0.00487851	0.255978	101540_at	NA	0.446872	7.45408	4.65644	0.000985109	0.0515226
102925_at	Dusp9	-0.625223	5.53614	-3.55224	0.0049194	0.257044	102338_at	Pde9a	-0.423431	5.66006	-4.65579	0.000986059	0.0515226
95444_at	Vmp1	0.408809	9.8046	3.54807	0.00495453	0.257801	100130_at	Jun	0.815288	6.69103	4.64371	0.00100396	0.0521564
104567_at	Mrpl46	0.289326	7.46816	3.54193	0.00500668	0.259433	104566_at	Asl	0.45459	7.8873	4.64198	0.00100654	0.0521564
99521_at	Ak4	-0.442722	8.12367	-3.53878	0.0050337	0.259756	95756_at	Ftsj3	0.61453	5.24751	4.63875	0.0010114	0.0521916
160085_at	Tst	0.278767	8.52952	3.53607	0.00505696	0.259882	97430_at	Slc37a4	0.500839	10.1136	4.62651	0.00103002	0.0529337
97958_at	Zmynd8	-0.367467	5.54812	-3.53125	0.00509875	0.260167	101804_at	NA	-0.342413	6.10918	-4.62363	0.00103446	0.0529437
93753_at	Litaf	0.432972	7.77425	3.52937	0.00511515	0.260167	100002_at	Itih3	0.52153	11.3833	4.61325	0.00105061	0.0535511
103511_at	Prr5	0.425011	8.79244	3.52774	0.00512937	0.260167	97553_at	Galnt2	0.34894	9.01101	4.60504	0.00106359	0.0537827
97919_at	Prpf38b	-0.346128	6.98623	-3.52587	0.00514585	0.260167	96594_at	Hspa4	-0.566165	8.63529	-4.60493	0.00106377	0.0537827
95725_at	Acy3	0.358177	11.6435	3.52237	0.00517664	0.260669	104477_at	Fam46c	0.603863	5.75077	4.59838	0.00107424	0.054093
94850_at	NA	0.370083	7.65207	3.51997	0.00519789	0.260688	92816_r_at	Eif4a1	0.34888	7.54552	4.57948	0.00110505	0.0553595
96828_at	Gnmt	0.737564	8.23897	3.51599	0.00523336	0.261417	92452_at	Pik3ca	-0.343405	5.502	-4.57581	0.00111116	0.0553595
104227_at	Gpr97	-0.250438	7.65005	-3.50497	0.00533283	0.265324	95057_at	Herpud1	1.77926	10.6022	4.57489	0.00111269	0.0553595
92658_at	Foxq1	-0.492993	8.63041	-3.49998	0.00537855	0.266537	160970_at	Odf2	0.375682	4.61191	4.55426	0.00114768	0.0568739
160857_at	Efnb2	-0.413017	6.90305	-3.48684	0.00550079	0.271444	98408_at	Hhex	-0.870158	7.3992	-4.54795	0.00115861	0.0571884
96657_at	Sat1	0.434107	10.1412	3.48469	0.00552105	0.271444	95411_at	1110004F10Rik	0.388031	8.54098	4.54224	0.0011686	0.0574547
100297_at	Wdr26	0.382894	7.96534	3.48218	0.00554486	0.271546	94000_at	NA	-0.570454	5.27144	-4.53698	0.00117788	0.057684
102116_f_at	Syt3	-0.250168	5.77147	-3.47947	0.0055706	0.271741	93324_at	Zfp36l1	-0.905044	8.62633	-4.53385	0.00118345	0.0577302
94485_at	Eci2	0.392381	8.34814	3.46989	0.00566274	0.274232	161801_r_at	Sema3b	-0.417229	3.95801	-4.53089	0.00118874	0.0577624
102239_at	Bcl3	-0.263542	8.92878	-3.46798	0.00568137	0.274232	98589_at	Plin2	0.796242	11.9934	4.51844	0.00121123	0.0586274
96417_s_at	Hoxb8	-0.240594	6.2698	-3.46734	0.00568754	0.274232	94509_at	Ncbp2	-0.555966	4.82281	-4.49678	0.00125147	0.0602339
160957_at	Dicer1	-0.346407	7.06167	-3.45865	0.00577284	0.277274	95348_at	Cxcl1	-0.457406	7.05231	-4.49541	0.00125407	0.0602339
160869_at	Sirt3	0.303272	8.08266	3.44216	0.0059384	0.284083	92996_at	Sox17	-0.33291	7.05294	-4.48912	0.00126603	0.0605754
97293_at	NA	-0.270194	6.67104	-3.44003	0.00596009	0.284083	104516_at	Cldn5	-0.412601	6.61092	-4.47853	0.00128647	0.0613183
97318_at	Dtd1	0.281698	7.20456	3.43071	0.00605621	0.287566	102348_at	NA	0.908975	8.08889	4.47172	0.00129979	0.0617179
160377_at	Tardbp	-0.495406	7.19483	-3.42313	0.00613549	0.289273	94869_at	Aebp2	0.462585	7.34325	4.45596	0.00133121	0.0629702
102828_at	Map2k6	0.490308	5.37872	3.42285	0.00613847	0.289273	93872_at	Gfra1	0.777032	6.27556	4.44992	0.00134346	0.0631548
96176_at	Arih2	0.318027	8.06082	3.41208	0.00625309	0.293566	160273_at	Zfp36l2	0.755466	8.46686	4.44624	0.00135098	0.0631548
162278_r_at	Tap1	-0.233164	6.58764	-3.39242	0.00646788	0.302513	100514_at	Gna13	0.388648	7.33749	4.44452	0.00135452	0.0631548
104670_at	Dennd4c	-0.471733	6.32358	-3.38744	0.00652348	0.303975	100494_at	Fgf1	0.800737	7.56024	4.44321	0.00135721	0.0631548
99491_at	Il10rb	-0.320511	9.21391	-3.38274	0.00657645	0.304461	92806_at	Pdrg1	-0.417009	7.54465	-4.44157	0.00136058	0.0631548
104360_at	Svil	-0.273497	9.61772	-3.38219	0.00658269	0.304461	93753_at	Litaf	0.492951	8.08134	4.43922	0.00136545	0.0631548
94942_at	Cstf1	0.327998	7.6811	3.37814	0.00662869	0.304501	103015_at	Bcl6	1.04987	6.75605	4.41618	0.00141412	0.0648468
92855_at	NA	0.464205	10.2516	3.37783	0.0066323	0.304501	162206_f_at	Socs3	-0.319922	6.45041	-4.41366	0.00141955	0.0648468
92832_at	Socs1	-0.244144	8.04795	-3.37532	0.00666097	0.304697	92600_f_at	Cyp4a10	1.04587	9.4695	4.41152	0.00142418	0.0648468
98943_at	Rpa2	0.257238	6.91644	3.36978	0.00672473	0.306318	104415_at	Foxp1	0.328273	5.68603	4.41033	0.00142678	0.0648468
98604_at	Rrp1	0.35974	7.58567	3.36799	0.00674547	0.306318	161384_r_at	NA	0.277745	8.7931	4.40862	0.0014305	0.0648468
99999_at	Zfml	-0.560809	6.9652	-3.35485	0.00689988	0.311559	103630_at	Lars	0.410007	7.1661	4.40738	0.00143319	0.0648468
160481_at	Pck1	0.383864	10.4941	3.35045	0.00695237	0.311559	92659_at	Rapgef4	0.275319	5.54051	4.40372	0.00144122	0.0649745
97146_g_at	Erlin1	-0.261206	6.59659	-3.35004	0.00695728	0.311559	103043_at	Mtcp1	-0.3961	6.21168	-4.40062	0.00144803	0.0650466
99662_at	Nup85	-0.326307	7.09862	-3.34976	0.00696067	0.311559	96852_at	Prkar1a	0.658975	9.10124	4.39231	0.0014665	0.0656404
161779_r_at	Cryl1	-0.264056	7.70417	-3.3474	0.00698898	0.311709	101446_at	Tpd52l1	0.344366	6.67949	4.38782	0.00147657	0.065855
102252_at	Pfdn2	0.306816	8.42644	3.33986	0.00708044	0.314664	92423_at	Pard6a	-0.315082	6.7902	-4.37785	0.00149922	0.0666272
99486_at	Cenpb	0.650495	8.77693	3.33594	0.00712846	0.315674	98111_at	Hsph1	-1.24642	7.26851	-4.37511	0.0015055	0.0666691
96341_at	Syf2	0.299225	8.69022	3.3242	0.00727416	0.320988	104584_f_at	Crb3	-0.341265	6.61163	-4.35617	0.00154974	0.0683856
94228_at	Xpo1	-0.518144	6.47616	-3.32062	0.00731923	0.32184	160885_at	Nucks1	0.957633	7.65783	4.3498	0.00156493	0.0686883
161025_f_at	Sox18	-0.233357	7.57613	-3.31349	0.00740984	0.323544	101554_at	Nfkbia	0.995194	9.38939	4.34868	0.0015676	0.0686883
97969_at	Nr1h4	0.356352	8.50003	3.31184	0.00743097	0.323544	103345_at	Sptan1	0.271578	7.629	4.34249	0.00158254	0.0688787
93138_at	Zswim7	0.331578	7.63903	3.30994	0.0074554	0.323544	92804_at	Polr2h	-0.329379	7.52135	-4.34228	0.00158304	0.0688787
94852_at	Glul	0.529885	7.13129	3.30945	0.00746161	0.323544	94261_at	Thrap3	0.362789	9.40909	4.34004	0.00158849	0.0688787
100951_at	Pkd2	-0.444951	9.19196	-3.30632	0.00750204	0.324171	97370_at	Spryd4	0.297567	8.81242	4.33612	0.00159807	0.0690545
94980_at	Dusp11	-0.311266	6.82025	-3.30155	0.00756411	0.324412	96672_at	Hopx	0.654976	9.7985	4.31345	0.00165464	0.071252
100595_at	Ptp4a2	0.270842	9.22158	3.3	0.0075844	0.324412	101069_g_at	Mkrn1	0.606819	7.79964	4.30336	0.0016805	0.0718921
101489_at	NA	-0.613419	8.20255	-3.29991	0.00758555	0.324412	101416_f_at	Gpank1	-0.262119	8.11141	-4.30316	0.00168101	0.0718921
103891_i_at	Ell2	0.455183	7.96812	3.29625	0.00763365	0.325355	94860_at	Timm17a	0.578199	7.98782	4.29341	0.00170641	0.0727291
160520_at	Yap1	-0.330066	9.18004	-3.29171	0.00769372	0.3268	92724_at	Hnrnpa1	0.558898	5.94955	4.28281	0.00173449	0.0736747
102144_f_at	Sfpq	-0.425536	4.81068	-3.2859	0.00777134	0.328584	94898_at	Rbm18	0.43987	6.48029	4.27798	0.00174745	0.0739735
94384_at	Ier3	0.372017	9.56306	3.28357	0.00780271	0.328584	93827_at	Tdo2	0.742605	10.8481	4.27155	0.00176486	0.074458
160791_at	Luc7l3	-0.378419	5.45065	-3.2816	0.00782933	0.328584	104360_at	Svil	-0.344932	9.23563	-4.26178	0.00179165	0.0753339
104087_at	Anapc16	0.310844	8.78062	3.27962	0.00785609	0.328584	95030_at	Prlr	-0.831042	8.9139	-4.25515	0.00181011	0.0758544
92411_at	Hs1bp3	-0.235761	8.82658	-3.2788	0.00786728	0.328584	94806_at	Pdhb	0.456466	9.59843	4.24481	0.00183925	0.0768179
160146_r_at	Polr2c	-0.25477	7.54846	-3.27658	0.00789749	0.328746	94383_at	Tfpi2	-0.501211	8.96384	-4.24196	0.00184737	0.0769
95590_at	Alg5	0.367025	7.6221	3.27276	0.00794975	0.329822	100916_at	Slc22a1	-0.304499	10.5959	-4.2362	0.00186389	0.0773298
99622_at	Klf4	0.317871	7.17089	3.27008	0.00798669	0.330258	94556_at	Snx10	0.420405	6.97718	4.22831	0.0018868	0.078021
102114_f_at	Angptl4	0.496661	8.39691	3.26278	0.00808816	0.330561	103039_at	Itga5	-0.284733	6.01043	-4.22568	0.0018945	0.0780809
96348_at	Pnpla2	0.400547	10.3863	3.26143	0.00810702	0.330561	103471_at	Tbc1d15	0.545295	6.77084	4.22185	0.00190575	0.0782863
101583_at	Btg2	0.241147	9.60659	3.26131	0.0081088	0.330561	160177_at	Smu1	0.447982	7.92721	4.21821	0.00191654	0.0784715
103933_at	Siae	-0.30645	6.93965	-3.2606	0.00811871	0.330561	104193_at	Fam76b	0.417076	5.87951	4.21378	0.00192974	0.0787534
101492_at	NA	0.346687	6.66864	3.25828	0.00815137	0.330561	161092_at	Umps	-0.287539	7.66026	-4.21005	0.00194094	0.0789528
92628_at	NA	0.368873	11.0744	3.25817	0.00815284	0.330561	95721_at	Mapkapk2	0.651005	9.10534	4.19211	0.00199572	0.0809173
160065_s_at	Csrp1	0.678688	8.3496	3.25471	0.00820177	0.331468	98346_at	Tsku	0.926632	7.86438	4.18429	0.00202013	0.0816422
160342_r_at	Ndufb2	0.273598	5.66722	3.24867	0.00828804	0.33256	98892_at	Lpin1	1.8763	9.44114	4.17615	0.00204585	0.0824149
97404_at	Dda1	0.409487	7.23737	3.24744	0.0083056	0.33256	AFFX-b-ActinMur/M12481_M_at	Actb	0.340557	12.4528	4.16965	0.00206665	0.0829848
92986_g_at	NA	-0.220149	7.0792	-3.24218	0.00838158	0.33256	160842_at	Kin	0.348902	5.42751	4.158	0.00210447	0.0842328
102037_at	Mapre2	-0.249846	6.95451	-3.24102	0.00839847	0.33256	99045_at	Eno2	-0.272664	5.42483	-4.14617	0.00214361	0.0854599
96578_r_at	Ubap2l	0.305413	7.27202	3.24076	0.00840213	0.33256	160323_at	Sra1	0.487395	8.55984	4.14462	0.00214882	0.0854599
95148_at	Ak2	0.304108	9.04289	3.23604	0.00847108	0.33256	99144_s_at	NA	0.292518	7.89316	4.13705	0.00217433	0.0861974
104694_at	Zfp758	-0.410586	5.26161	-3.23399	0.00850125	0.33256	103598_at	Dhx9	0.333996	6.01997	4.13504	0.00218116	0.0861974
93430_at	Ackr3	-0.712964	7.86394	-3.2319	0.008532	0.33256	93772_i_at	Zranb2	-0.628002	7.51442	-4.12067	0.00223068	0.0878762
94199_at	Kap	-0.383847	13.468	-3.23156	0.00853704	0.33256	101841_at	Egfr	-0.440046	7.4806	-4.109	0.00227175	0.0888969
160708_at	NA	-0.267908	6.25789	-3.23104	0.00854482	0.33256	97891_at	Sac3d1	-0.272024	7.66683	-4.10742	0.00227736	0.0888969
96726_at	Cdk8	0.302416	8.28019	3.22866	0.0085801	0.33256	161467_f_at	Atp1b1	0.375691	7.62525	4.10726	0.00227795	0.0888969
94461_at	Nampt	0.470566	7.80409	3.22713	0.00860277	0.33256	101008_at	Tcerg1	0.300383	4.63368	4.10216	0.00229619	0.0893299
95460_at	Cops5	0.312369	7.899	3.226	0.00861965	0.33256	162495_r_at	Bet1	-0.308546	3.93467	-4.09352	0.00232748	0.0902657
93582_at	Coq7	0.37872	7.82972	3.22502	0.00863425	0.33256	160131_at	Amotl2	-0.308394	6.89131	-4.08747	0.00234962	0.0908424
104522_at	Itsn1	-0.24602	8.28576	-3.22378	0.00865282	0.33256	103332_at	Gpr125	-0.355467	3.79259	-4.07709	0.00238819	0.0920486
162486_f_at	Dscr3	-0.318399	7.71819	-3.22132	0.00868985	0.33256	94532_at	Atp6v1e1	0.379425	8.87853	4.07169	0.00240849	0.0925454
95350_at	Ttr	-0.495529	7.77419	-3.22046	0.00870275	0.33256	104117_at	Wdr20	-0.30638	5.80944	-4.06072	0.00245035	0.0938648
97319_at	Rrad	-0.230683	7.09924	-3.21993	0.00871068	0.33256	92656_at	Zbtb12	-0.416147	6.95	-4.0536	0.00247789	0.0944178
98979_at	Mnat1	0.298677	7.45454	3.21834	0.00873477	0.33256	160954_at	Syn2	-0.263197	6.98244	-4.05309	0.0024799	0.0944178
94756_at	NA	-0.29004	4.62314	-3.2115	0.00883893	0.334486	104256_at	Cytip	0.312314	5.71519	4.04858	0.00249753	0.0947999
102840_at	Ptpn12	-0.236161	6.06094	-3.20962	0.00886769	0.334486	101518_at	Ift20	-0.258994	6.27285	-4.03641	0.00254581	0.0962932
95497_at	Tipin	0.259709	5.90149	3.20854	0.0088843	0.334486	104576_at	Ski	-0.633406	7.99817	-4.0348	0.0025523	0.0962932
97430_at	Slc37a4	0.415835	10.2017	3.20801	0.00889249	0.334486	92573_at	Ppp2r1a	0.342261	9.4658	4.03033	0.00257029	0.0966802
160799_at	NA	0.773868	7.53102	3.20587	0.00892554	0.334721	101429_at	Ddit3	-0.420262	7.06655	-4.02246	0.00260236	0.0975924
104548_at	Phlda2	-0.440379	7.89509	-3.20093	0.00900222	0.336586	161709_at	Fancc	-0.295453	4.81434	-4.0192	0.00261579	0.0975961
103702_i_at	Slc22a30	-0.510907	5.63748	-3.19892	0.00903376	0.336757	96656_at	Wdr48	-0.623148	6.57468	-4.01864	0.00261809	0.0975961
95801_s_at	Zfp260	-0.311637	4.88743	-3.19423	0.00910743	0.338205	93978_at	B3galnt2	-0.432639	4.35103	-4.0152	0.00263233	0.097835
94876_f_at	Gorasp2	0.242917	9.58978	3.19301	0.00912677	0.338205	96285_at	Myadm	0.323269	8.89377	4.00472	0.00267622	0.099171
98280_at	Mmp16	-0.246272	6.57244	-3.18848	0.00919863	0.339859	102651_at	Gck	0.641789	9.71853	3.99534	0.00271614	0.100353
104304_r_at	Polr3k	-0.300959	5.09177	-3.17889	0.00935297	0.344542	160958_at	9430016H08Rik	0.464889	6.26195	3.99237	0.0027289	0.100527
98356_at	Adcy9	-0.303309	7.53141	-3.17237	0.00945929	0.345186	95062_at	Cast	0.416141	7.03281	3.98942	0.00274166	0.1007
94835_f_at	Tubb2a	0.453736	9.29864	3.17125	0.00947767	0.345186	99427_at	Hoxd12	-0.272832	5.46374	-3.98349	0.00276747	0.100821
103087_at	Sult1a1	0.237673	6.56264	3.17071	0.0094867	0.345186	93918_at	NA	1.01609	6.15464	3.98337	0.002768	0.100821
94395_at	Fubp1	-0.588461	5.33574	-3.17007	0.00949714	0.345186	98087_at	Tbk1	0.34812	6.95346	3.98063	0.00278001	0.100821
102996_at	Ell	0.272063	7.48587	3.16937	0.00950865	0.345186	160522_at	Nrep	-0.283889	8.27099	-3.97857	0.0027891	0.100821
93209_at	Nek4	-0.215896	5.89653	-3.16604	0.00956377	0.346181	97486_at	U2af1	0.565697	8.65378	3.97827	0.0027904	0.100821
98120_at	Mrpl27	0.279487	9.46412	3.16	0.00966465	0.346611	160234_at	Usp1	0.337181	5.31508	3.97759	0.00279342	0.100821
96504_at	Pax8	0.316664	9.31323	3.15805	0.00969733	0.346611	103645_at	Dnajb8	-0.246888	5.01915	-3.96852	0.00283381	0.101455
93273_at	Snca	-0.281758	5.63841	-3.15647	0.00972407	0.346611	103074_f_at	NA	0.645599	6.19593	3.96783	0.00283688	0.101455
99086_g_at	Usp3	0.334472	6.54258	3.15548	0.00974071	0.346611	161462_r_at	NA	-0.384515	5.08669	-3.96739	0.00283889	0.101455
93935_at	Nlk	-0.23338	5.14184	-3.15541	0.00974189	0.346611	98946_at	Wsb1	-0.652115	6.77913	-3.96566	0.00284664	0.101455
94821_at	Xbp1	-0.550698	8.94146	-3.15463	0.00975505	0.346611	160297_at	Ccdc58	-0.383156	6.97021	-3.96292	0.00285904	0.101455
95411_at	1110004F10Rik	0.27779	8.82791	3.15234	0.00979392	0.346611	104096_at	Orc4	-0.336082	5.04438	-3.96277	0.00285972	0.101455
96338_at	Egln2	0.247797	9.22349	3.15212	0.00979771	0.346611	100144_at	Ncl	0.635374	8.42078	3.9586	0.00287864	0.101837
102371_at	Nr4a1	0.295882	6.81888	3.14824	0.00986393	0.347968	100554_at	Pdlim1	0.7259	8.71862	3.95303	0.00290419	0.10245
99336_at	Rps5	0.244256	12.0227	3.14259	0.00996125	0.349475	160199_at	Hnrnpc	0.465207	5.47967	3.95122	0.00291254	0.102456
96604_at	Dus1l	0.251355	7.89562	3.14227	0.0099668	0.349475	98583_at	Btg4	-0.242545	5.33256	-3.93969	0.00296627	0.104053
162453_at	NA	-0.223806	6.02201	-3.14089	0.00999061	0.349475	161135_f_at	Sac3d1	-0.280209	8.07444	-3.93225	0.00300152	0.104994
160463_at	Ppp1r15a	0.264157	8.17192	3.13716	0.0100555	0.350763	96831_at	Pdia5	-0.294738	7.68265	-3.92883	0.00301784	0.105271
160068_at	Sap30	-0.621799	6.14456	-3.13515	0.0100907	0.35101	96785_at	Kank3	0.357669	5.96235	3.91507	0.00308457	0.107298
101525_at	Ndufb10	0.336452	10.8025	3.12385	0.0102909	0.356979	93029_at	Idh3g	0.579993	8.5052	3.91127	0.00310326	0.10743
101305_at	Pou3f3	-0.531964	7.02269	-3.12041	0.0103526	0.358124	99941_at	Ces3a	-0.444588	11.57	-3.91015	0.00310879	0.10743
100084_at	Ezr	0.250591	9.47595	3.11679	0.0104178	0.358164	99658_f_at	Fahd1	-0.366033	9.70161	-3.90794	0.00311974	0.10743
95302_at	Mtor	0.212783	8.62608	3.11421	0.0104646	0.358164	160791_at	Luc7l3	-0.389096	4.57549	-3.90733	0.00312276	0.10743
103092_at	Trim37	-0.308994	5.87919	-3.11379	0.0104723	0.358164	104155_f_at	Atf3	0.558677	6.61819	3.90207	0.003149	0.108035
102686_at	Suv420h2	-0.272912	8.57851	-3.1128	0.0104904	0.358164	103393_at	Pspc1	0.296034	4.18572	3.89938	0.0031625	0.108201
103738_at	BC037034	-0.21526	9.71516	-3.11082	0.0105266	0.358164	103893_at	Fbxo38	0.3026	6.83062	3.89695	0.0031748	0.108325
100022_at	Cish	-0.285048	8.2968	-3.11069	0.010529	0.358164	100949_at	Fam20c	-0.41535	7.96772	-3.89315	0.00319405	0.108685
104096_at	Orc4	-0.269999	6.39343	-3.1093	0.0105545	0.358164	93938_at	Slc30a1	0.353466	4.89679	3.88352	0.00324345	0.110066
94288_at	Hist1h1c	0.425974	10.5638	3.10323	0.0106664	0.359229	101582_at	Gnl2	0.357383	6.78313	3.86393	0.0033464	0.113126
95634_at	NA	0.361297	6.70368	3.10295	0.0106716	0.359229	160363_at	Vps72	-0.23968	8.94085	-3.86073	0.00336355	0.113126
104419_at	Fndc3a	-0.49625	6.31757	-3.10292	0.0106722	0.359229	96123_at	Lbp	0.496898	9.74927	3.85962	0.00336947	0.113126
160929_at	Mettl3	-0.308709	5.82463	-3.09246	0.0108681	0.363157	98150_at	Rab11b	0.329303	8.90273	3.85955	0.00336986	0.113126
96760_at	Timm9	-0.318083	5.8964	-3.09141	0.010888	0.363157	94954_at	Anapc4	0.239339	7.32756	3.85727	0.00338215	0.113234
93169_at	Zfp322a	-0.459941	7.47453	-3.09111	0.0108936	0.363157	161668_f_at	Por	0.333986	8.28523	3.85207	0.00341038	0.113874
101216_at	NA	-0.229174	7.05429	-3.0905	0.0109052	0.363157	94386_at	Son	0.536456	7.40282	3.84963	0.00342372	0.114014
92191_at	Mettl5	0.439134	6.42902	3.08696	0.0109726	0.36443	95419_at	H1f0	0.896261	9.81699	3.84434	0.00345279	0.114677
100632_at	Prkag1	0.246214	8.52828	3.07922	0.0111212	0.368145	98942_r_at	Gpcpd1	0.69753	4.15573	3.83971	0.00347841	0.115221
99699_at	NA	-0.215208	3.69651	-3.07772	0.0111503	0.368145	102159_at	NA	-0.25733	5.19211	-3.83718	0.00349256	0.115384
102318_at	St8sia4	-0.368185	5.14234	-3.0741	0.0112208	0.368145	96938_at	Keg1	-0.746196	7.0971	-3.82702	0.00354981	0.116727
103015_at	Bcl6	0.290316	7.15323	3.07369	0.0112288	0.368145	95159_at	NA	0.657231	8.00101	3.82665	0.00355191	0.116727
101088_f_at	Cnbp	0.493937	9.20962	3.07185	0.0112649	0.368145	103932_at	Dcaf13	0.883647	6.61345	3.82335	0.00357068	0.117036
102821_s_at	NA	0.397055	10.1602	3.07124	0.0112767	0.368145	93670_at	Erf	0.452009	7.23083	3.81723	0.00360589	0.117881
98868_at	Bcl2	-0.352256	4.68774	-3.07053	0.0112908	0.368145	100085_at	Ggt1	-0.237704	5.72888	-3.81134	0.00364009	0.118525
160171_f_at	Acot9	0.368414	8.45168	3.06773	0.0113459	0.368979	104235_at	Sun2	0.446851	9.38797	3.81057	0.00364457	0.118525
104617_at	0610005C13Rik	0.526354	10.1178	3.06152	0.0114691	0.371167	97740_at	Dusp16	0.893951	7.33395	3.80359	0.00368562	0.11903
103949_at	Ihh	-0.281121	7.70492	-3.06135	0.0114726	0.371167	100464_at	3110043O21Rik	0.354643	6.18592	3.80183	0.00369601	0.11903
97757_at	Sva	-0.221225	5.24233	-3.05564	0.0115872	0.373905	161488_r_at	Mrpl36	-0.297043	5.07343	-3.79693	0.00372518	0.11903
101008_at	Tcerg1	0.239133	5.0501	3.05075	0.0116864	0.375236	103982_s_at	Adh4	-0.49341	7.55201	-3.79565	0.00373283	0.11903
104142_at	Ints8	-0.462461	5.39702	-3.05064	0.0116886	0.375236	96657_at	Sat1	0.430722	8.76984	3.79431	0.00374091	0.11903
104494_at	Sowahc	-0.469168	6.30164	-3.03998	0.0119075	0.380322	93017_at	Sdcbp	0.371779	5.37228	3.79345	0.00374608	0.11903
98910_at	NA	0.221388	9.90149	3.03957	0.0119161	0.380322	161788_f_at	S1pr1	-0.432015	5.24109	-3.79266	0.00375078	0.11903
93518_at	Rnps1	0.248784	9.53952	3.0385	0.0119383	0.380322	96640_at	Fam107b	0.932545	8.58458	3.79156	0.00375741	0.11903
100469_at	Nfya	-0.25157	7.46347	-3.03602	0.01199	0.380887	97404_at	Dda1	0.572802	6.14582	3.79143	0.00375825	0.11903
99963_at	Zfp101	-0.346626	5.31898	-3.03472	0.0120171	0.380887	97936_at	Zfp746	0.36472	6.36857	3.79139	0.00375844	0.11903
AFFX-MurFAS_at	Fas	0.221062	5.41097	3.0315	0.0120848	0.382065	103988_at	Atg2a	0.275381	7.46534	3.79031	0.00376497	0.11903
92696_at	Nr6a1	-0.233842	5.4438	-3.02921	0.0121331	0.382623	103342_at	Eed	0.429961	6.07228	3.78439	0.00380092	0.119367
101430_at	Sox4	0.227816	7.79801	3.02174	0.012292	0.386431	104149_at	Nfkbia	0.786883	8.59799	3.78345	0.00380666	0.119367
94486_at	Lrrc59	0.220593	8.81114	3.02063	0.0123158	0.386431	104030_at	Ptch1	-0.468741	5.79192	-3.78172	0.00381728	0.119367
96172_at	Gimap4	-0.429154	8.11887	-3.01617	0.0124118	0.388469	93691_s_at	Grb10	-0.246369	5.55741	-3.78098	0.00382179	0.119367
95752_at	Sbds	0.293661	9.97453	3.01249	0.0124918	0.389995	96912_s_at	NA	0.491821	6.49353	3.7797	0.00382968	0.119367
103642_at	G3bp1	-0.20987	9.02463	-3.00593	0.0126354	0.393495	101086_f_at	Cnbp	0.547147	9.63107	3.77917	0.00383296	0.119367
100626_at	Odf2	0.320219	5.00267	3.00331	0.0126932	0.39431	102701_at	Cyp2b10	0.473925	8.51608	3.77654	0.00384922	0.119575
160550_i_at	Magoh	0.370941	7.14396	2.99287	0.0129264	0.40056	94362_at	Nras	0.35512	7.56141	3.76192	0.00394078	0.122115
101052_g_at	S100a3	-0.199554	3.69326	-2.99018	0.0129873	0.401034	99490_at	Thoc3	0.328896	6.97851	3.75926	0.00395765	0.122283
93992_at	Babam1	0.285476	8.99234	2.98872	0.0130203	0.401034	161540_r_at	Dram2	-0.250254	3.20864	-3.75799	0.00396578	0.122283
104089_at	Snhg5	0.439436	4.98633	2.98794	0.0130381	0.401034	160519_at	Timp3	0.378406	6.92392	3.75211	0.0040035	0.123142
94826_at	Eif6	0.394405	8.47923	2.98566	0.0130898	0.401636	92577_f_at	NA	0.335295	11.2346	3.74944	0.0040207	0.123367
98512_at	Banp	-0.237508	8.40512	-2.97933	0.0132353	0.403485	101024_i_at	NA	-0.313653	7.66202	-3.74446	0.00405311	0.124057
92483_g_at	Fmnl1	0.246794	7.5648	2.97819	0.0132615	0.403485	93975_at	Errfi1	0.770124	11.6772	3.74078	0.00407722	0.12449
93559_at	Apex1	0.262481	7.6838	2.97791	0.0132681	0.403485	97846_at	Cdc5l	0.473322	6.57682	3.73317	0.00412751	0.125718
99179_at	Cuedc2	0.264748	8.07309	2.97696	0.01329	0.403485	99666_at	Cs	0.370213	9.08345	3.72764	0.00416448	0.126329
98113_at	Psmb1	0.284863	9.47964	2.97603	0.0133117	0.403485	93231_at	Hic1	-0.295352	6.67554	-3.72593	0.00417599	0.126329
101446_at	Tpd52l1	0.31694	7.98078	2.97243	0.0133955	0.404911	104303_i_at	Polr3k	-0.317504	5.53496	-3.72565	0.00417791	0.126329
100564_at	Ddt	0.426144	9.97136	2.97123	0.0134235	0.404911	160288_at	Map1lc3b	0.739456	9.14849	3.72352	0.00419226	0.126456
95647_f_at	Mob1a	-0.350705	7.94365	-2.96551	0.0135583	0.40799	93454_at	Cd93	0.240495	6.39537	3.7202	0.00421484	0.126831
98550_at	Set	0.22022	8.37851	2.95978	0.0136944	0.411094	98036_at	Marveld1	-0.276404	8.30839	-3.71276	0.00426576	0.128055
104255_at	Fhod3	0.388576	8.01154	2.95648	0.0137734	0.412476	99027_at	Bcl2l1	0.255442	8.38274	3.70811	0.00429791	0.128711
103930_at	N4bp1	-0.244684	7.68957	-2.95322	0.0138522	0.413743	161081_at	Cpeb2	0.51149	6.60677	3.70484	0.00432069	0.128902
94522_at	Dctn3	0.366445	9.68515	2.95139	0.0138965	0.413743	96124_at	Trak1	0.379866	7.67937	3.70412	0.00432571	0.128902
104526_at	Tfeb	-0.242463	6.51978	-2.95023	0.0139246	0.413743	101688_at	D4Ertd58e	-0.282128	6.18409	-3.70275	0.00433527	0.128902
99807_r_at	Fv1	-0.289012	6.90274	-2.94891	0.0139566	0.413743	101440_at	Macrod2	-0.282461	6.29957	-3.69852	0.00436501	0.129478
93376_at	Bmp2k	0.252505	4.6946	2.94462	0.0140615	0.413743	99622_at	Klf4	0.262921	5.62482	3.6933	0.00440204	0.130267
97925_at	Csnk1e	0.491814	7.8994	2.9436	0.0140865	0.413743	AFFX-b-ActinMur/M12481_5_at	Actb	0.384393	12.1743	3.68981	0.00442696	0.130543
95428_at	Imp4	0.338508	8.48551	2.94323	0.0140958	0.413743	95027_at	Usp21	-0.296429	7.51534	-3.68861	0.00443554	0.130543
99112_at	Slc25a10	0.273375	9.58595	2.94181	0.0141306	0.413743	101084_f_at	Dpm3	-0.437799	9.24268	-3.68761	0.00444272	0.130543
92554_at	Ctbp2	-0.277159	8.74744	-2.94116	0.0141466	0.413743	102233_at	Mettl20	-0.597486	5.62426	-3.68068	0.00449282	0.131326
99140_at	Mrpl16	0.280913	9.1848	2.94114	0.0141471	0.413743	104293_at	Klhl21	0.297568	8.66836	3.68027	0.00449583	0.131326
103285_at	Mbd4	-0.284892	5.70724	-2.93898	0.0142005	0.414336	160069_at	Gmnn	0.263544	5.16511	3.67957	0.00450093	0.131326
97864_at	Fam32a	0.47846	4.7691	2.93748	0.0142379	0.414459	102364_at	Jund	0.863598	11.2967	3.67596	0.00452726	0.131633
92527_at	Adcy9	-0.261511	7.14559	-2.93358	0.0143352	0.41632	161870_at	Usp15	-0.389422	8.61194	-3.67407	0.00454117	0.131633
104220_at	Smad6	-0.255502	7.91026	-2.92891	0.0144523	0.418748	92832_at	Socs1	-0.22685	7.61548	-3.67211	0.0045556	0.131633
99176_at	Fibp	0.262601	7.14009	2.92311	0.0145996	0.420955	94382_at	1110057K04Rik	-0.559179	6.76357	-3.67132	0.00456143	0.131633
94085_at	Srgn	0.268945	6.37425	2.92236	0.0146187	0.420955	93781_at	Miox	-0.222596	6.04485	-3.67095	0.00456418	0.131633
96346_at	Cdo1	0.437512	9.31447	2.92164	0.0146371	0.420955	100459_at	Rad50	-0.268501	6.33681	-3.66953	0.00457469	0.131633
104079_at	Dyrk1a	0.282084	7.62821	2.92056	0.0146646	0.420955	98849_at	NA	-0.477747	6.05965	-3.66602	0.00460079	0.13208
93624_at	Slc10a6	0.317557	6.77767	2.91836	0.014721	0.420955	102370_at	Hsd17b11	0.427678	9.90485	3.6622	0.00462938	0.132381
101398_at	Stxbp2	0.31909	8.82158	2.91798	0.0147307	0.420955	98367_at	Hoxd3	-0.216495	4.70957	-3.66013	0.00464492	0.132381
162206_f_at	Socs3	-0.216029	6.35468	-2.91556	0.0147931	0.421773	162310_r_at	Zfp771	-0.243324	8.50924	-3.66012	0.00464497	0.132381
94460_at	Stk38	-0.31804	7.51142	-2.91331	0.0148516	0.422475	94493_at	Cldn3	-0.673862	8.1911	-3.65896	0.0046537	0.132381
103620_s_at	Smn1	0.312871	7.43006	2.90145	0.0151623	0.429675	98937_at	Tbrg1	0.467329	8.21553	3.64971	0.00472404	0.133905
160182_at	Srsf6	-0.356717	8.75398	-2.90077	0.0151802	0.429675	96098_at	Mrpl36	-0.591549	6.58772	-3.6491	0.00472871	0.133905
96131_at	Tbc1d10a	0.254891	8.29323	2.89973	0.0152079	0.429675	95565_at	Mad2l1bp	-0.224403	7.14728	-3.644	0.004768	0.134554
161308_f_at	Yap1	-0.279214	6.42443	-2.89772	0.0152614	0.430139	162185_i_at	Poldip3	-0.286763	4.89839	-3.64334	0.00477316	0.134554
92705_at	Tbx2	-0.216949	8.71179	-2.89652	0.0152932	0.430139	160955_at	Fam136a	-0.24708	7.67536	-3.64193	0.00478409	0.134558
97383_at	Slc6a6	0.320316	9.99526	2.89378	0.0153666	0.431231	92497_at	Slc22a4	-0.234012	5.32055	-3.63114	0.00486866	0.136629
92671_f_at	Rgl1	-0.423726	6.28918	-2.8898	0.0154739	0.43327	99543_s_at	Dguok	-0.373668	8.41227	-3.62781	0.00489502	0.137061
100986_at	Fhl2	-0.183159	7.62318	-2.88048	0.0157278	0.439395	104132_at	Emc8	0.425754	7.06733	3.62271	0.00493575	0.137892
104616_g_at	Galt	0.362098	7.6591	2.87807	0.0157941	0.44026	161161_r_at	Nme1	-0.437589	6.25617	-3.61346	0.0050106	0.13967
101104_at	Dscr3	-0.326952	8.41047	-2.8755	0.0158653	0.44126	98952_at	Tcf25	0.322233	7.69776	3.61063	0.00503371	0.140002
160792_at	Snapin	0.23223	8.05162	2.87338	0.0159242	0.441914	103073_i_at	NA	0.414745	8.66381	3.60911	0.00504618	0.140037
92660_f_at	Ube2e1	0.359611	7.10492	2.8713	0.0159822	0.442541	97991_at	Kras	0.420369	6.64186	3.60719	0.00506197	0.140164
98920_g_at	Tm2d2	0.362523	8.65942	2.86857	0.0160585	0.443668	98608_at	Etf1	0.312707	8.53827	3.60478	0.00508182	0.140402
96799_at	Fbxw5	0.297406	8.01225	2.86405	0.0161859	0.446201	98990_at	Bcar1	-0.321804	8.42534	-3.59951	0.00512561	0.141237
99849_at	Wdr92	0.579507	11.2358	2.85995	0.0163023	0.44842	104241_at	Mef2d	0.391685	8.81317	3.59843	0.00513465	0.141237
95655_at	Nabp1	-0.510869	5.09317	-2.85687	0.0163903	0.449849	98996_at	Plk4	-0.274956	5.08599	-3.59188	0.00518969	0.141754
104290_at	Casp8ap2	-0.339239	5.62365	-2.85308	0.016499	0.451841	96654_at	Wdr48	-0.285985	4.16939	-3.59007	0.00520504	0.141754
103973_at	Kcnj1	-0.600735	9.31076	-2.85145	0.0165462	0.452141	160466_at	Rae1	0.302957	6.17882	3.58972	0.00520795	0.141754
95539_at	Rab3ip	0.296368	9.44497	2.84276	0.0167992	0.457741	96833_at	Nucks1	0.263175	7.00416	3.58941	0.00521058	0.141754
97812_at	Ranbp9	0.33761	6.03484	2.84106	0.0168492	0.457741	162221_i_at	Blmh	0.414689	7.16641	3.58816	0.00522124	0.141754
92534_at	Gem	0.479539	6.2223	2.84066	0.0168611	0.457741	94321_at	Krt10	-0.319197	4.74152	-3.58615	0.00523835	0.141754
103333_at	G6pc	0.614289	11.7068	2.83835	0.0169292	0.458595	98760_at	Zfhx4	-0.307648	6.96365	-3.58427	0.00525447	0.141754
95606_at	Syncrip	0.364189	4.60169	2.8367	0.0169779	0.458919	96921_at	Ttc1	0.308089	6.27623	3.58353	0.00526075	0.141754
99103_at	Irf3	-0.263144	7.39832	-2.83248	0.0171038	0.459759	95340_at	Mt3	0.272624	10.1576	3.58317	0.00526391	0.141754
97107_at	Mterf2	-0.217397	4.45652	-2.83221	0.0171118	0.459759	102020_at	Kcnk3	-0.347256	5.03314	-3.58281	0.00526697	0.141754
92452_at	Pik3ca	-0.288552	6.66691	-2.83079	0.0171543	0.459759	94270_at	Krt18	0.417002	8.70342	3.58048	0.00528696	0.141986
104477_at	Fam46c	-0.323641	5.43714	-2.83072	0.0171563	0.459759	103610_at	Pde4b	-0.367927	6.53851	-3.57637	0.00532256	0.142548
93670_at	Erf	0.402286	7.9629	2.82926	0.0172003	0.459952	96890_at	Lonp2	0.276438	10.0962	3.57538	0.00533116	0.142548
95785_s_at	Rab7	0.598539	8.27599	2.82032	0.017471	0.465374	92569_f_at	Nop58	0.631044	5.15979	3.57412	0.00534213	0.142548
101450_at	Csf1	-0.328019	8.41745	-2.82011	0.0174776	0.465374	99959_at	Ak4	-0.676004	6.85819	-3.57179	0.00536249	0.142786
161074_at	Pcyt1a	0.270271	7.30294	2.81357	0.0176784	0.469705	160666_at	Actr6	0.359339	6.46174	3.57031	0.00537544	0.142827
101546_at	Neu1	-0.316255	9.06399	-2.81094	0.0177598	0.469705	101995_at	Sqstm1	0.279284	10.1927	3.56851	0.00539118	0.142856
94001_at	Elavl1	-0.342215	7.72512	-2.81073	0.0177664	0.469705	162449_f_at	Gpr182	-0.666558	5.21228	-3.56758	0.00539944	0.142856
93261_at	Lgmn	0.282339	9.97019	2.80655	0.0178966	0.469705	100746_at	NA	0.272371	4.10687	3.56591	0.00541417	0.142904
104491_at	Phtf2	-0.188282	6.23002	-2.80582	0.0179195	0.469705	95448_at	Psmc2	0.468395	9.2482	3.56478	0.00542412	0.142904
95896_at	Cox7c	-0.208099	5.07778	-2.80325	0.0180002	0.469705	99535_at	Ccrn4l	1.34385	8.04459	3.56206	0.0054483	0.143239
102402_at	Gbas	0.316655	9.81428	2.8028	0.0180142	0.469705	104349_at	Snip1	0.277836	6.93201	3.55947	0.00547134	0.143434
104629_at	Asb3	-0.194877	7.05496	-2.80178	0.0180465	0.469705	160103_at	March7	0.646662	6.5915	3.55566	0.00550548	0.143434
162324_at	Lor	-0.199303	7.0957	-2.80032	0.0180925	0.469705	92559_at	Vcam1	1.18906	4.19137	3.55563	0.00550576	0.143434
97907_at	Lsm7	0.4302	8.40714	2.79979	0.0181094	0.469705	98324_at	Foxa3	0.698868	7.062	3.55525	0.00550914	0.143434
104431_at	Prkcq	-0.197131	7.10337	-2.79873	0.0181429	0.469705	103690_at	Lat2	0.23237	5.05768	3.55481	0.00551317	0.143434
160905_s_at	Chd3os	-0.364096	4.9209	-2.79841	0.0181532	0.469705	93741_at	Nmd3	0.421083	6.4257	3.55296	0.00552983	0.143569
162169_r_at	Hist1h2bp	-0.195157	8.98851	-2.79805	0.0181644	0.469705	95646_at	Cpt2	0.335115	10.5542	3.54159	0.00563354	0.145958
96674_at	Tnpo3	-0.343997	8.15675	-2.79745	0.0181835	0.469705	94318_at	Apoh	0.273838	12.6553	3.53815	0.00566525	0.146241
103527_at	Slc35e4	0.217026	7.11209	2.79665	0.0182091	0.469705	103020_s_at	Map3k1	0.391385	6.87062	3.53787	0.00566788	0.146241
99467_at	Rasa1	-0.412055	5.54701	-2.79561	0.0182421	0.469705	97511_at	Mgll	0.449912	8.20976	3.53437	0.00570036	0.146245
97251_at	Mrps10	0.387429	7.08063	2.79279	0.0183324	0.471059	96777_at	Sf3b1	0.832365	5.67055	3.53414	0.00570256	0.146245
161432_f_at	Sart3	-0.206737	7.55549	-2.78971	0.0184314	0.471962	104709_at	Sec23a	0.358831	8.6244	3.53407	0.00570318	0.146245
102156_f_at	NA	-0.647753	5.90882	-2.78832	0.0184759	0.471962	161451_r_at	Clcn5	-0.252728	4.16946	-3.53136	0.00572852	0.146594
92988_i_at	Cadps	-0.298321	4.3836	-2.78817	0.0184809	0.471962	93838_at	Ppdpf	-0.373756	10.0179	-3.52657	0.0057736	0.147313
98451_at	Dnajb2	-0.402919	6.83053	-2.78433	0.0186054	0.472573	93400_at	Xiap	-0.263469	4.20913	-3.52587	0.00578021	0.147313
94332_at	Ets1	-0.206186	4.41999	-2.78298	0.0186495	0.472573	97906_at	Siah2	-0.285173	7.06852	-3.5212	0.00582452	0.147704
99490_at	Thoc3	0.310546	7.2786	2.78248	0.0186657	0.472573	95728_g_at	Apoa5	-0.372079	12.1646	-3.5209	0.00582739	0.147704
97546_at	Cldn1	0.247357	4.63573	2.78109	0.0187111	0.472573	99180_at	Gtpbp4	0.629937	8.12584	3.51895	0.00584601	0.147704
95679_at	Cdk2ap2	-0.254168	8.70536	-2.77924	0.0187717	0.472573	103578_at	Tom1	0.331577	7.65767	3.51849	0.0058504	0.147704
104190_at	Traf6	0.327431	6.91257	2.77802	0.0188119	0.472573	104139_at	P4ha1	-0.359299	5.26309	-3.51804	0.00585469	0.147704
102965_at	Znfx1	-0.209459	8.20931	-2.77745	0.0188306	0.472573	102707_f_at	Serpina3c	0.335127	11.6075	3.5134	0.00589934	0.14853
96540_at	Mlph	-0.179914	6.82304	-2.77611	0.0188746	0.472573	97135_at	NA	-0.311058	4.75432	-3.51106	0.00592199	0.1488
95474_at	F2r	0.253876	8.97717	2.77292	0.0189802	0.472573	97808_at	Sf3b1	0.537923	8.41341	3.5032	0.00599878	0.150427
95975_at	A930012N16Rik	-0.246871	5.43989	-2.77212	0.0190069	0.472573	92877_at	Tgfbi	0.470257	7.2234	3.50052	0.0060252	0.150559
99034_at	Irx3	-0.443397	7.65562	-2.77053	0.0190597	0.472573	98398_s_at	Apobec1	0.28222	6.46197	3.50022	0.00602814	0.150559
93741_at	Nmd3	0.334334	6.74745	2.77012	0.0190732	0.472573	161311_at	NA	-0.199423	6.66328	-3.49378	0.00609205	0.151657
101007_at	Mknk2	0.267606	9.27707	2.76972	0.0190868	0.472573	101626_at	Adam7	-0.294404	6.23188	-3.49335	0.00609638	0.151657
97392_at	Tmem129	-0.251865	8.47739	-2.76926	0.0191019	0.472573	103081_at	Baz1b	-0.477366	8.19487	-3.47906	0.00624096	0.154944
97975_at	Nfatc3	-0.251459	7.87996	-2.76799	0.0191443	0.472573	93058_at	Eif1a	0.91727	8.17113	3.47401	0.00629288	0.155742
102661_at	Egr2	-0.206022	6.22615	-2.76783	0.0191499	0.472573	95562_at	Calcoco2	-0.2324	4.05236	-3.47281	0.00630534	0.155742
98571_s_at	Naca	0.253274	10.5424	2.7655	0.019228	0.472573	97253_at	Tpd52l2	-0.371237	5.41846	-3.47231	0.00631051	0.155742
95478_at	Deb1	0.237499	7.74267	2.76541	0.0192311	0.472573	162103_i_at	Col9a3	-0.246904	4.53085	-3.46713	0.00636442	0.156763
101543_f_at	Tuba1c	0.270168	11.7044	2.76497	0.0192457	0.472573	104040_at	Ddrgk1	-0.260471	5.7739	-3.46457	0.00639124	0.15683
161824_r_at	Ido1	-0.198862	7.91846	-2.76402	0.0192779	0.472573	92959_at	Frk	-0.213393	4.50695	-3.46447	0.00639224	0.15683
161260_f_at	Rgl1	-0.284883	5.11448	-2.76337	0.0192995	0.472573	104374_at	Serpina3n	0.509381	10.635	3.45922	0.00644764	0.157879
96867_at	Azgp1	0.203281	6.1335	2.7571	0.0195125	0.476853	101577_at	NA	0.335492	11.4134	3.45522	0.00649012	0.157933
161784_f_at	Star	-0.196129	5.82014	-2.75542	0.0195697	0.476997	101635_f_at	Mup5	-0.586347	12.4653	-3.45491	0.00649351	0.157933
92505_g_at	Hus1	-0.218973	4.56057	-2.75393	0.0196207	0.476997	161084_at	Zfp612	0.345121	4.08595	3.45341	0.0065095	0.157933
97847_at	Rbmx	0.19394	7.60829	2.7535	0.0196355	0.476997	162379_r_at	NA	-0.340045	7.17679	-3.45242	0.00652009	0.157933
92304_at	Piga	0.575592	6.1277	2.7516	0.0197008	0.476997	103816_at	F11r	0.341717	9.10815	3.45065	0.00653907	0.157933
161263_f_at	Casp2	-0.262613	7.59392	-2.75135	0.0197094	0.476997	161564_r_at	Pald1	-0.381865	5.4583	-3.44928	0.00655384	0.157933
99513_at	Pla2g4a	-0.245967	5.23788	-2.75013	0.0197514	0.477021	99073_at	Ccnf	0.52513	7.73415	3.44925	0.00655419	0.157933
101579_at	Srp9	0.279368	8.93298	2.74911	0.0197867	0.477021	160850_at	Fpgs	0.480149	10.233	3.44883	0.00655872	0.157933
160898_at	Abt1	0.193804	7.52926	2.74648	0.0198779	0.477892	100022_at	Cish	-0.25955	8.05408	-3.44837	0.00656368	0.157933
102675_at	Zp3	0.197365	6.03552	2.74586	0.0198994	0.477892	95848_at	2900097C17Rik	0.548016	6.42257	3.4444	0.00660668	0.158662
97253_at	Tpd52l2	-0.234939	6.13939	-2.73917	0.0201337	0.480659	98146_at	Nup88	0.424198	6.7839	3.43827	0.00667364	0.159493
92656_at	Zbtb12	-0.247773	7.42498	-2.73912	0.0201353	0.480659	160795_at	Scamp1	0.317279	6.26233	3.43774	0.00667942	0.159493
103242_at	Ap1g1	-0.285479	7.83914	-2.73823	0.0201668	0.480659	98875_at	Atg13	0.287525	7.33791	3.43772	0.0066796	0.159493
103762_at	Gtf2f1	0.228293	7.68997	2.73639	0.0202316	0.480659	100958_at	Spata13	-0.41952	7.2164	-3.43472	0.00671273	0.159839
100680_at	Usp17la	-0.200894	4.23531	-2.73539	0.0202672	0.480659	92968_at	Arf5	-0.215546	10.0617	-3.43389	0.0067218	0.159839
98111_at	Hsph1	-0.747555	8.65066	-2.73523	0.0202725	0.480659	93784_at	Cfdp1	0.297463	7.7175	3.43293	0.00673247	0.159839
94502_at	Med10	0.18895	7.61894	2.73491	0.020284	0.480659	160153_at	Dnajc7	0.361049	7.83962	3.4292	0.00677392	0.159944
97689_at	F3	-0.29696	6.43139	-2.72956	0.0204746	0.483849	94450_at	Nsun2	0.314537	6.7531	3.42827	0.00678433	0.159944
95699_f_at	Dnajc8	0.256522	10.1735	2.72896	0.0204962	0.483849	100277_at	Inhba	-0.580479	7.11653	-3.4263	0.00680631	0.159944
103012_at	NA	0.210369	7.67801	2.72293	0.0207132	0.487217	95901_f_at	NA	0.842177	6.81649	3.42573	0.0068127	0.159944
99621_s_at	Sfpq	-0.48477	5.99749	-2.72283	0.0207169	0.487217	162484_r_at	Tmed1	-0.217769	7.44374	-3.42442	0.00682748	0.159944
161352_r_at	NA	-0.206595	6.03397	-2.72132	0.0207717	0.487588	160261_i_at	Lats2	-0.462397	8.155	-3.42424	0.00682948	0.159944
92853_at	Hspb1	-0.191102	4.66068	-2.71853	0.020873	0.488133	93303_at	Ufd1l	0.332358	7.53557	3.42399	0.00683227	0.159944
93219_at	Acp1	0.264688	6.86151	2.71853	0.0208731	0.488133	160292_at	NA	0.345827	9.609	3.42336	0.00683936	0.159944
96139_at	Mogs	-0.216056	8.35543	-2.71724	0.0209203	0.488324	160310_at	D19Bwg1357e	0.208044	8.00296	3.42038	0.00687303	0.160381
160174_at	Xab2	0.194235	7.03121	2.71147	0.0211323	0.49208	93663_r_at	Zap70	-0.238656	9.53953	-3.41943	0.00688375	0.160381
160140_at	Tbce	0.249936	6.34493	2.71041	0.0211714	0.49208	160152_at	Psmc1	0.402602	8.30848	3.41778	0.00690252	0.160519
160383_at	Cox7a2l	0.251777	9.89594	2.70965	0.0211995	0.49208	93560_at	Acyp1	-0.336214	8.45334	-3.41126	0.00697704	0.16195
102197_at	Nucb2	0.247191	5.21917	2.70696	0.0212997	0.493489	100515_at	Furin	0.308903	9.50582	3.40338	0.00706833	0.163765
97997_at	Sfrp1	-0.391611	9.24106	-2.70555	0.021352	0.493691	92571_at	Hspa4	0.4828	6.04912	3.40054	0.00710152	0.164229
101030_at	Rhob	0.289808	9.62578	2.70286	0.0214528	0.493691	100703_at	Npy2r	-0.220831	4.70203	-3.39688	0.00714443	0.164329
92875_s_at	Cops7a	0.211919	7.37819	2.70219	0.0214779	0.493691	95037_at	Cdk9	0.226077	8.34285	3.39362	0.00718301	0.164329
160824_at	Rreb1	-0.372409	6.10637	-2.7017	0.0214962	0.493691	94951_at	Las1l	0.36042	6.98345	3.39354	0.00718394	0.164329
93986_at	Nsmce4a	0.405538	8.67867	2.70144	0.0215061	0.493691	94991_at	Synpo	0.376629	4.77588	3.39226	0.00719906	0.164329
96199_at	Mtm1	-0.306705	5.93226	-2.69568	0.0217235	0.497195	96894_at	Tmed4	0.231304	8.77279	3.39222	0.00719956	0.164329
101016_at	Arf1	0.309354	11.8052	2.69501	0.0217492	0.497195	102223_at	Ppl	0.279687	7.96892	3.39196	0.00720268	0.164329
103385_at	Fam60a	-0.209284	6.91509	-2.69424	0.0217781	0.497195	98948_at	Gnl3	0.538147	6.31934	3.39136	0.00720978	0.164329
101573_f_at	NA	0.261253	11.9375	2.6917	0.0218751	0.497804	93773_f_at	Zranb2	-0.907766	6.66872	-3.39035	0.00722181	0.164329
95067_at	Mrpl2	0.415734	7.99886	2.68928	0.0219681	0.497804	98079_at	Car14	0.429169	8.7908	3.38891	0.00723899	0.164329
98759_f_at	NA	0.30228	11.3494	2.68888	0.0219832	0.497804	94735_s_at	NA	-0.292054	5.81886	-3.38836	0.00724563	0.164329
98952_at	Tcf25	0.245381	8.17588	2.68834	0.022004	0.497804	160819_at	Ndrg4	-0.213155	5.90788	-3.38793	0.00725069	0.164329
95518_at	Fam134b	0.627116	10.2697	2.68834	0.0220041	0.497804	102336_at	Tmem131	0.340996	6.61872	3.38685	0.00726372	0.164329
102779_at	Gadd45b	0.265599	8.30123	2.68705	0.0220537	0.498023	93985_at	Tiparp	0.299274	6.2244	3.38204	0.00732153	0.1652
99867_at	1810019N24Rik	-0.249745	5.58852	-2.68434	0.0221582	0.498768	96742_at	Dpt	-0.245613	4.74898	-3.38145	0.00732869	0.1652
101618_r_at	Trp53-ps	-0.187213	9.44817	-2.68413	0.0221666	0.498768	93598_at	Snx5	0.288313	6.0342	3.37929	0.00735484	0.16549
93681_at	Fzd2	-0.188671	7.42457	-2.6811	0.0222843	0.500516	94113_at	4933415E08Rik	-0.376464	5.91331	-3.37629	0.0073914	0.165857
98021_at	Polr1e	0.273027	5.78391	2.67711	0.02244	0.503108	94098_at	Hcrt	-0.204223	7.8436	-3.37578	0.00739768	0.165857
96038_at	Rnase4	0.540908	6.26917	2.67074	0.0226913	0.50755	98984_f_at	Gpd2	0.74038	8.13519	3.37452	0.00741308	0.165904
100007_at	Irf2bp1	-0.180437	9.07915	-2.66918	0.0227532	0.50755	162125_f_at	Ubc	0.276947	10.286	3.37111	0.00745485	0.166541
99167_at	Commd4	0.395906	8.41493	2.66838	0.022785	0.50755	95617_at	Rbl2	0.430064	5.62331	3.36507	0.00752962	0.167275
98106_at	Timm44	0.250454	8.37756	2.66799	0.0228007	0.50755	96882_at	Eif3m	0.349249	8.46264	3.36488	0.00753208	0.167275
160366_at	BC031181	0.456088	9.54502	2.66382	0.0229672	0.508919	95077_at	Rabggtb	0.327953	6.80905	3.36432	0.00753896	0.167275
103631_at	Zfp688	0.20245	7.55571	2.66344	0.0229826	0.508919	92303_at	Ptprr	0.250326	7.35186	3.36343	0.00755014	0.167275
96575_at	Rpl8	0.277632	11.9165	2.66339	0.0229845	0.508919	160799_at	NA	1.79112	7.82836	3.36255	0.00756114	0.167275
93456_r_at	Bmp4	0.311722	7.04738	2.66083	0.0230875	0.510294	104261_at	Asxl1	0.334655	5.2454	3.36199	0.0075681	0.167275
97478_at	Naa35	-0.212068	7.98925	-2.6582	0.0231939	0.511741	103812_at	Clca1	0.221635	5.54076	3.35813	0.00761649	0.168047
104320_at	Pdxk	0.209735	9.9606	2.65661	0.0232585	0.512261	97880_at	Dlst	0.3739	8.44845	3.3566	0.00763586	0.168177
97964_at	Fkbp11	0.232815	7.20676	2.65464	0.0233385	0.513119	160811_at	Ccz1	0.231499	7.43725	3.35349	0.00767511	0.168744
160574_at	Dgcr14	0.176835	6.88188	2.65293	0.0234084	0.513752	103562_f_at	NA	1.82895	8.36732	3.3523	0.00769027	0.16878
100929_at	Mtmr9	-0.217157	5.393	-2.65062	0.0235029	0.514401	97866_at	Fam32a	-0.297252	7.56307	-3.34987	0.00772129	0.168901
93318_at	Ninj1	0.310742	8.94596	2.64923	0.0235601	0.514401	100968_at	Cstf3	-0.27375	4.73728	-3.34975	0.00772281	0.168901
92531_at	Sec62	-0.389606	6.59458	-2.6492	0.0235616	0.514401	101392_at	Chmp7	-0.307202	7.57064	-3.34709	0.00775681	0.169348
161455_r_at	Rae1	-0.317394	9.72579	-2.64533	0.0237213	0.516849	92888_s_at	Styx	-0.413438	5.8001	-3.34501	0.00778352	0.169405
101180_at	Atm	-0.3302	6.84265	-2.64448	0.0237565	0.516849	102769_f_at	Sc5d	-0.597261	9.71457	-3.34478	0.00778655	0.169405
104058_at	Ppp1r21	0.202317	9.51116	2.63987	0.0239485	0.52012	97890_at	Sgk1	0.711141	7.6047	3.34198	0.00782272	0.169716
102761_at	Grpel2	0.207296	7.01899	2.63821	0.0240183	0.520729	103254_at	Trafd1	0.320295	8.41062	3.34157	0.00782803	0.169716
98407_at	Efnb1	-0.246971	7.99699	-2.63497	0.0241544	0.522773	103328_at	Tank	0.563011	4.7901	3.33477	0.00791661	0.171147
96098_at	Mrpl36	-0.302725	7.29939	-2.63166	0.0242945	0.524266	98428_at	Spast	-0.33074	5.72221	-3.33337	0.00793492	0.171147
94817_at	Serpinh1	-0.341042	9.01438	-2.63084	0.0243291	0.524266	93997_at	Tor1aip2	-0.397531	7.57543	-3.33335	0.00793515	0.171147
92300_at	Mnt	0.285042	7.66691	2.62951	0.024386	0.524266	161735_r_at	Fam213a	-0.294264	7.91604	-3.33203	0.00795257	0.171227
103440_at	Gabpa	-0.339457	5.96305	-2.62938	0.0243913	0.524266	160497_at	Tmem179b	-0.381544	8.13203	-3.32641	0.00802698	0.172426
100962_at	Nab2	-0.206631	7.3771	-2.62605	0.0245338	0.525083	161308_f_at	Yap1	-0.218444	5.86979	-3.32574	0.00803586	0.172426
93874_s_at	NA	0.238348	8.70149	2.62555	0.0245552	0.525083	100985_at	Siah1a	0.340832	7.04246	3.32357	0.00806472	0.172617
100583_at	NA	-0.306741	6.98373	-2.6254	0.0245615	0.525083	100125_at	Pa2g4	0.349686	5.22103	3.323	0.00807242	0.172617
97263_s_at	Csnk1d	0.328838	9.80715	2.62456	0.0245975	0.525083	98045_s_at	Dab2	-0.38715	5.40707	-3.30642	0.00829727	0.176734
96360_at	Arhgdia	0.261515	10.6205	2.62198	0.0247087	0.526557	96712_at	Smoc1	0.439843	10.4316	3.30568	0.00830744	0.176734
162029_r_at	Cox18	-0.250642	3.91905	-2.62008	0.0247909	0.527408	160200_at	Oser1	0.380902	5.9951	3.30336	0.00833942	0.176734
93638_s_at	NA	-0.212817	3.97881	-2.61549	0.0249903	0.530747	161767_r_at	Mrps18a	-0.219523	10.3243	-3.30319	0.0083418	0.176734
94454_at	NA	0.319672	10.077	2.61161	0.02516	0.533444	95028_r_at	NA	-0.241471	7.40568	-3.30271	0.00834843	0.176734
102027_s_at	NA	0.221684	9.74869	2.61017	0.0252232	0.533621	95069_at	Ssrp1	0.28373	8.24421	3.30261	0.00834985	0.176734
162100_r_at	Tcta	-0.213494	8.97646	-2.60948	0.0252539	0.533621	99855_at	Map3k5	0.359175	5.89197	3.30079	0.00837507	0.176753
95648_at	Mob1a	-0.231821	8.29669	-2.60801	0.0253188	0.533826	100005_at	Traf4	-0.315117	7.67426	-3.30009	0.00838473	0.176753
92615_at	Ndufb6	0.307004	11.5577	2.60732	0.025349	0.533826	103538_at	Tbx3	-0.404583	4.51899	-3.29948	0.00839322	0.176753
96654_at	Wdr48	-0.202962	4.63249	-2.6056	0.0254257	0.534539	101936_at	Clk4	0.375032	5.79744	3.2967	0.00843199	0.17727
161798_r_at	Gtf3c4	-0.207164	7.65498	-2.60255	0.0255613	0.535689	100126_at	Chrac1	0.286568	7.64902	3.2932	0.00848118	0.178005
96155_at	Cdk5rap3	0.228168	8.89213	2.60244	0.0255662	0.535689	162093_at	Yars	-0.29287	7.17233	-3.28876	0.00854384	0.178702
94410_f_at	Ccdc12	0.218419	9.75201	2.60135	0.025615	0.535812	94017_s_at	Srsf2	0.623287	10.237	3.28764	0.0085597	0.178702
100546_at	Rbm4	-0.217507	5.26183	-2.59997	0.0256766	0.536204	160928_at	Tfpt	0.348762	5.36098	3.28631	0.00857863	0.178702
95110_at	Ppil2	0.317813	7.1575	2.59805	0.0257628	0.536223	100325_at	Gp49a	0.487993	4.11579	3.28614	0.00858103	0.178702
97966_at	Ncoa5	-0.225423	7.32217	-2.59804	0.0257634	0.536223	98070_at	Suds3	-0.19702	8.49373	-3.2858	0.00858593	0.178702
95875_at	C78651	-0.201198	6.52804	-2.59578	0.0258649	0.537439	100024_at	Shroom3	-0.687325	6.25465	-3.28399	0.00861174	0.178941
102255_at	Osmr	-0.340166	6.12505	-2.59336	0.0259746	0.538652	160296_at	Wsb2	0.232676	6.62146	3.28181	0.0086429	0.17929
103309_at	Mtor	0.357926	8.90511	2.59161	0.026054	0.538652	162129_f_at	Ppfibp2	-0.27944	3.63832	-3.28034	0.00866411	0.179432
162457_f_at	NA	-0.223388	10.7361	-2.59146	0.0260608	0.538652	94810_at	Ewsr1	0.390282	8.72537	3.27558	0.00873289	0.180557
93118_at	Hnrnpa2b1	0.335114	6.19059	2.59024	0.0261164	0.538652	99338_at	Cand1	0.220582	5.41988	3.2719	0.00878636	0.180836
104583_at	Zdhhc6	-0.294343	7.14273	-2.58975	0.0261389	0.538652	92540_f_at	Srm	-0.265741	7.67927	-3.27179	0.00878801	0.180836
99475_at	Socs2	-0.631631	8.04224	-2.58764	0.0262352	0.539744	104362_at	Ube2o	-0.261093	7.17499	-3.27166	0.00878982	0.180836
104719_at	Slc12a7	-0.279769	8.16046	-2.58668	0.0262794	0.539765	102009_at	Cyfip2	-0.248454	6.37758	-3.27066	0.00880443	0.180838
161208_r_at	Calu	-0.176267	6.27612	-2.58462	0.0263738	0.540524	160140_at	Tbce	0.279113	5.58323	3.26927	0.00882487	0.180903
100130_at	Jun	0.287715	7.2689	2.58279	0.0264584	0.540524	104325_at	Mrap	0.696451	8.81474	3.26847	0.00883655	0.180903
97491_at	Hnrnpr	0.27901	7.09573	2.58258	0.0264679	0.540524	98122_at	Lmo4	0.432078	7.16165	3.26578	0.00887607	0.181415
101703_at	NA	-0.205638	9.62397	-2.58211	0.0264895	0.540524	96891_at	Anp32b	0.298028	8.72549	3.26288	0.00891902	0.181587
103070_at	Sirpa	-0.303958	7.71742	-2.57743	0.026707	0.543319	103808_at	Golga5	0.406255	6.57276	3.26277	0.00892064	0.181587
95049_at	NA	0.301923	10.6363	2.57729	0.0267135	0.543319	92975_at	Sh3bp2	0.23577	6.30668	3.26226	0.00892815	0.181587
95881_f_at	Helb	-0.229526	7.75096	-2.57446	0.0268456	0.544585	92581_at	Acadm	0.346631	10.8448	3.25816	0.0089892	0.182532
103733_at	Taok3	-0.210799	6.75038	-2.57363	0.0268845	0.544585	97683_at	NA	-0.244026	6.4662	-3.25619	0.00901867	0.182833
99101_at	Eif3d	0.322219	9.62533	2.57316	0.0269066	0.544585	95109_at	Nop56	0.307234	6.21298	3.25504	0.00903598	0.182887
103222_at	Eps8	-0.433552	7.06573	-2.57178	0.0269715	0.545016	97531_at	G0s2	0.797195	9.73079	3.25274	0.00907065	0.183292
104415_at	Foxp1	0.278516	5.69969	2.57017	0.0270472	0.545662	100734_at	NA	0.534787	10.5498	3.25148	0.00908957	0.183377
104755_at	Tnip1	-0.234658	8.57747	-2.5651	0.0272874	0.548997	97526_at	Ap3m1	-0.322761	7.44649	-3.24744	0.00915087	0.184037
98767_at	Yy1	-0.300408	7.95102	-2.56474	0.0273046	0.548997	160287_at	Map1lc3b	0.697231	8.46024	3.24738	0.00915175	0.184037
103436_at	Gtpbp1	0.208909	7.89185	2.56391	0.0273443	0.548997	95538_at	Arpc5l	-0.243177	7.71208	-3.24641	0.00916658	0.184039
102914_s_at	NA	-0.236431	8.36449	-2.56191	0.0274398	0.549391	161281_f_at	NA	0.23718	4.86728	3.24473	0.00919214	0.184256
99956_at	Kit	-0.195916	6.44248	-2.56133	0.0274674	0.549391	162017_at	NA	-0.247334	6.55728	-3.23963	0.00927045	0.185177
97497_at	Notch1	-0.323369	8.08457	-2.5604	0.0275122	0.549391	102827_at	Nek7	0.459862	8.51989	3.23951	0.00927242	0.185177
161327_f_at	Rpl10a	0.218555	9.48254	2.55982	0.0275399	0.549391	94460_at	Stk38	-0.291351	7.11662	-3.23874	0.00928425	0.185177
95694_at	Top1	-0.376231	9.2712	-2.55841	0.0276079	0.549869	93281_at	Rcn2	0.28493	5.52207	3.23752	0.00930317	0.185177
96189_at	Zcchc10	-0.231535	4.18351	-2.55621	0.0277138	0.550587	162388_r_at	Adam5	-0.234908	9.90262	-3.23693	0.00931222	0.185177
99062_at	Pvrl3	-0.326244	5.60099	-2.55474	0.0277853	0.550587	95618_at	Rab11fip5	-0.256311	5.37445	-3.23507	0.00934114	0.185282
92611_at	NA	-0.554189	7.80049	-2.55355	0.027843	0.550587	160583_at	Lyve1	0.328109	5.24215	3.23468	0.00934718	0.185282
160866_at	Dffa	-0.169261	9.1357	-2.55313	0.0278635	0.550587	96069_at	Akr7a5	-0.261578	10.4124	-3.23344	0.00936646	0.18537
98047_at	Ubr7	0.217154	7.59919	2.55299	0.0278701	0.550587	160564_at	Lcn2	1.35883	7.29409	3.23057	0.00941137	0.185964
160075_at	Nit1	0.21142	8.74132	2.5522	0.0279085	0.550587	160130_at	Wdr26	0.405016	7.56662	3.22813	0.00944959	0.186363
161835_at	S100g	-0.372478	8.68986	-2.5467	0.0281776	0.554411	99935_at	Tjp1	-0.307033	7.45324	-3.22738	0.0094614	0.186363
94017_s_at	Srsf2	0.386185	10.6766	2.54518	0.0282523	0.554411	102712_at	Saa3	0.790301	8.29741	3.22547	0.00949163	0.186664
98887_at	Napa	0.272625	9.39197	2.54413	0.028304	0.554411	96564_at	Hspa8	-0.648	9.41498	-3.2224	0.00954018	0.187324
92608_at	Csrp1	0.596488	8.45884	2.54403	0.0283091	0.554411	160269_at	Gfer	-0.28205	9.13402	-3.21944	0.00958738	0.18783
96302_at	Srsf7	-0.266217	9.01776	-2.54302	0.0283589	0.554411	93793_at	Lasp1	-0.479257	8.69833	-3.21806	0.00960941	0.18783
94712_at	Vegfc	-0.210827	4.92546	-2.54282	0.0283687	0.554411	160402_at	Tceb2	-0.307389	10.6394	-3.21795	0.0096111	0.18783
161379_at	Polr1a	-0.182032	6.44515	-2.54126	0.0284461	0.555054	162299_f_at	Pebp1	-0.448043	8.10726	-3.21684	0.00962887	0.187867
97274_at	Psmd14	0.227751	8.30255	2.53727	0.0286447	0.557257	101034_at	Grb2	0.275325	8.77171	3.21429	0.00966997	0.187867
100468_g_at	Lyl1	-0.299427	5.91814	-2.5348	0.028768	0.557257	161766_i_at	Dalrd3	-0.271862	5.82756	-3.21428	0.00967006	0.187867
161968_f_at	Ccr5	-0.32665	4.10508	-2.53476	0.0287703	0.557257	161348_r_at	Pdlim1	-0.243662	8.35559	-3.21368	0.00967968	0.187867
93761_at	Hnrnpu	-0.178929	4.60309	-2.53421	0.0287977	0.557257	104457_at	Vps13c	-0.31073	4.16985	-3.21268	0.00969589	0.187867
97431_at	Slc22a6	-0.386717	9.7628	-2.53406	0.0288052	0.557257	161153_r_at	Renbp	-0.264833	5.15501	-3.21117	0.00972029	0.187867
92376_at	Rit1	0.24375	7.31532	2.53363	0.0288267	0.557257	161554_r_at	Coasy	-0.350127	7.69948	-3.21065	0.00972871	0.187867
96056_at	Rhoc	0.232735	9.65017	2.53198	0.0289101	0.55742	92490_at	Kif9	-0.221312	6.60032	-3.21037	0.00973333	0.187867
161782_r_at	NA	-0.299426	4.93402	-2.53119	0.0289499	0.55742	95074_at	Pex19	0.339822	7.95491	3.20891	0.00975698	0.188033
102046_at	Srsf10	-0.419503	6.40395	-2.53008	0.0290059	0.55742	99820_f_at	Cecr5	0.244248	7.07759	3.20419	0.00983394	0.189224
104139_at	P4ha1	-0.282608	7.22669	-2.52993	0.0290137	0.55742	98906_at	Fbxo9	0.267008	7.51646	3.20199	0.00987008	0.189509
99624_at	9530068E07Rik	0.216862	9.80491	2.52596	0.0292151	0.55907	95619_at	Pradc1	-0.368415	5.54635	-3.20144	0.00987912	0.189509
92346_at	Nefm	-0.215946	6.27576	-2.52503	0.0292625	0.55907	92350_at	Mapre1	0.313747	6.69025	3.19601	0.00996908	0.190775
104302_f_at	Commd9	0.222995	7.64247	2.52464	0.029282	0.55907	161559_i_at	Aqp1	-0.287345	7.53739	-3.19561	0.00997569	0.190775
160706_at	Slc22a23	-0.42426	5.96676	-2.52442	0.0292935	0.55907	104304_r_at	Polr3k	-0.264772	5.16981	-3.19257	0.0100263	0.191174
102399_at	Rbpms	0.212077	8.32256	2.52383	0.0293234	0.55907	103726_at	Yipf5	-0.318403	7.77357	-3.19252	0.0100271	0.191174
92717_at	Neurod1	-0.187302	3.86641	-2.52254	0.0293894	0.559473	102698_at	Epas1	0.244548	6.68503	3.18957	0.0100766	0.191614
96281_at	Atp6v1g1	0.325148	10.735	2.51825	0.0296099	0.562814	95026_at	Retsat	0.331339	9.09591	3.18931	0.0100809	0.191614
97343_at	Mepce	-0.246221	9.38389	-2.51126	0.0299731	0.568049	104366_at	Zfp362	0.270762	5.80754	3.18032	0.0102334	0.194135
97420_at	Lrg1	0.355846	6.87323	2.51059	0.0300082	0.568049	96755_at	Etf1	0.644866	8.69083	3.17966	0.0102446	0.194135
94055_at	Cttn	0.356279	6.6634	2.51032	0.0300218	0.568049	160355_at	Maz	-0.17701	7.45757	-3.17798	0.0102734	0.194385
98983_at	P4ha2	-0.227053	8.08368	-2.50821	0.0301325	0.56928	104666_at	Zfp653	0.241886	6.10918	3.1769	0.0102919	0.194441
103073_i_at	NA	0.209433	8.87284	2.50732	0.0301794	0.569305	98124_at	0610011F06Rik	-0.258593	9.20613	-3.1747	0.0103297	0.19486
104558_at	Rcor1	-0.228974	7.09457	-2.50466	0.0303195	0.570682	161541_r_at	Tchh	-0.277019	6.21977	-3.17302	0.0103587	0.194996
101510_at	Psme1	0.333793	9.56343	2.5042	0.0303437	0.570682	160195_at	Naa60	-0.397025	8.77291	-3.17245	0.0103686	0.194996
98040_at	Tcf3	-0.19281	8.49455	-2.50177	0.0304726	0.572243	96029_at	Sf3a3	0.327662	7.24492	3.17154	0.0103843	0.194996
161438_r_at	NA	-0.26619	3.94906	-2.50018	0.0305569	0.572808	160481_at	Pck1	0.745076	10.3782	3.16885	0.010431	0.194996
160324_at	Rpa3	-0.203732	6.23125	-2.49948	0.0305944	0.572808	96709_at	1110008P14Rik	-0.391595	7.62829	-3.16825	0.0104415	0.194996
97354_at	Gtf3c1	-0.210125	8.15697	-2.49691	0.0307318	0.573919	93551_at	Polr2l	-0.254384	9.6255	-3.16773	0.0104505	0.194996
160935_at	Ddhd1	-0.225656	6.36969	-2.49665	0.0307457	0.573919	162402_r_at	Hoxa4	-0.271797	4.21601	-3.16764	0.0104522	0.194996
93010_at	Pqbp1	0.178089	7.76755	2.49405	0.0308852	0.573926	102940_at	Ltb	-0.261258	7.32384	-3.16709	0.0104618	0.194996
103927_at	Zfp568	-0.219106	5.87141	-2.49221	0.0309844	0.573926	104231_at	Hnrnph3	-0.264974	6.85474	-3.16588	0.010483	0.195052
98968_at	Myo5a	0.285905	5.75662	2.49191	0.0310005	0.573926	92800_i_at	NA	-0.336698	11.7944	-3.16513	0.0104961	0.195052
95664_at	Sec14l1	0.211735	5.83644	2.49133	0.0310318	0.573926	160857_at	Efnb2	-0.313323	5.70358	-3.1634	0.0105265	0.195326
96284_at	Csnk1g2	0.25061	9.58249	2.49093	0.031053	0.573926	94453_at	Mien1	-0.337189	8.13579	-3.16052	0.0105772	0.195552
92549_at	Pkig	0.197569	9.54327	2.48998	0.0311046	0.573926	92596_at	Cacybp	-0.415649	4.8577	-3.15856	0.0106119	0.195552
160782_at	Rprd1a	-0.262015	8.56422	-2.48966	0.0311221	0.573926	97411_at	Ect2	-0.202484	4.41724	-3.15836	0.0106153	0.195552
102969_at	Neurl4	-0.257434	8.49814	-2.48823	0.0311998	0.573926	92795_at	Map4	0.348307	4.90655	3.15732	0.0106337	0.195552
100718_at	NA	0.219057	10.2393	2.48729	0.0312507	0.573926	99865_at	Bmpr2	-0.19818	6.214	-3.15699	0.0106396	0.195552
97891_at	Sac3d1	-0.217402	8.17949	-2.48677	0.0312788	0.573926	162213_i_at	Tmbim1	-0.267184	5.88628	-3.15662	0.0106463	0.195552
100894_at	Orc5	-0.234369	6.7534	-2.48539	0.0313543	0.573926	93311_at	Clk3	-0.254216	7.2848	-3.1562	0.0106538	0.195552
160379_at	Epb4.1	0.357309	8.62851	2.48513	0.0313684	0.573926	162222_r_at	Eif4e	-0.264825	5.64685	-3.15563	0.0106639	0.195552
162265_r_at	Klf17	-0.21363	6.6075	-2.48502	0.0313745	0.573926	102955_at	Nfil3	0.410611	7.14134	3.1537	0.0106983	0.195895
104666_at	Zfp653	0.182804	6.81147	2.48475	0.0313895	0.573926	97828_at	Siva1	-0.209788	7.21743	-3.15272	0.0107158	0.195928
97269_f_at	Krtcap2	0.275796	9.90652	2.48091	0.0315997	0.574794	103755_at	Sh3d19	-0.388757	6.8463	-3.15126	0.0107421	0.196122
104356_at	Taf9	-0.237006	6.37077	-2.48086	0.0316025	0.574794	93742_at	Tsen15	-0.219763	6.37894	-3.14783	0.0108037	0.196811
160704_at	Lgalsl	-0.254318	6.4306	-2.48067	0.0316127	0.574794	96485_at	NA	-0.175693	6.74483	-3.14741	0.0108114	0.196811
92792_at	Ucp2	-0.196352	5.60134	-2.48052	0.031621	0.574794	161696_f_at	C77080	-0.418995	5.32373	-3.14057	0.0109356	0.19829
162482_at	Traf4	-0.179541	9.82743	-2.47691	0.0318205	0.577263	93907_f_at	NA	-0.451454	8.4537	-3.1397	0.0109515	0.19829
160565_at	Ckmt1	0.32638	7.1958	2.47639	0.0318493	0.577263	95791_s_at	Srsf2	0.667785	8.02945	3.13876	0.0109687	0.19829
96249_at	Sep15	0.376613	10.0356	2.47447	0.0319558	0.578353	161977_r_at	Scin	-0.376116	4.41985	-3.13867	0.0109705	0.19829
96975_at	Igk	-0.232847	7.40853	-2.47168	0.0321117	0.579177	96655_g_at	Wdr48	-0.252803	7.62645	-3.13746	0.0109926	0.19829
160603_at	Med1	-0.231364	8.71524	-2.46919	0.0322509	0.579177	98915_at	Rnf149	0.468776	9.40236	3.13741	0.0109934	0.19829
93959_at	Smim4	-0.258894	6.01511	-2.46848	0.0322908	0.579177	96677_at	Setd8	-0.3216	8.21652	-3.13596	0.0110201	0.19829
98552_at	Pmf1	0.240553	7.72459	2.46749	0.0323467	0.579177	161167_r_at	Uck1	-0.217811	7.32477	-3.13579	0.0110233	0.19829
161513_r_at	Chmp1b	-0.226412	5.52926	-2.46644	0.0324058	0.579177	94477_at	NA	-0.29149	6.67291	-3.13461	0.0110451	0.19829
100877_at	1810058I24Rik	0.286949	9.12966	2.46614	0.0324225	0.579177	160722_at	Rnmtl1	0.228094	6.01151	3.13404	0.0110556	0.19829
98002_at	Irf8	-0.264012	7.10857	-2.466	0.0324306	0.579177	160521_at	Ltv1	0.29088	5.28987	3.13341	0.0110673	0.19829
96810_at	Lmo2	-0.215206	8.01833	-2.46473	0.0325023	0.579177	101924_at	Rad51d	-0.223027	5.60138	-3.13147	0.0111033	0.19865
94406_at	Phtf1	-0.22296	7.67145	-2.46398	0.0325444	0.579177	93696_at	Nr1i2	0.264753	6.41164	3.12875	0.0111539	0.19927
101485_at	NA	0.246537	9.67837	2.4638	0.032555	0.579177	100903_at	Parp2	0.272048	6.74719	3.12539	0.0112168	0.200107
100050_at	Id1	0.453962	8.70913	2.46324	0.0325866	0.579177	102832_at	NA	-0.228313	6.54588	-3.11973	0.0113235	0.201466
104183_at	Tubgcp4	-0.308265	6.60129	-2.46321	0.0325881	0.579177	93747_at	Ptplad1	0.594241	10.0484	3.11963	0.0113252	0.201466
94232_at	Ccnd1	0.255844	9.58779	2.46293	0.0326042	0.579177	93525_f_at	NA	0.306014	7.08837	3.11833	0.01135	0.20154
97750_at	Rpsa	0.226308	10.5351	2.46206	0.0326532	0.579223	161712_r_at	Bnip2	-0.267116	8.5727	-3.11532	0.0114072	0.20154
96519_at	Pdxk	0.304312	6.834	2.45876	0.0328416	0.581738	98598_at	C78891	-0.302981	4.40781	-3.11434	0.0114259	0.20154
95765_at	Adh5	0.1956	10.2489	2.4544	0.0330914	0.583488	97261_at	Dnaja1	0.232258	9.4156	3.11359	0.0114404	0.20154
100636_at	Eif4ebp1	-0.235487	7.14503	-2.45384	0.0331236	0.583488	100154_at	Tapbp	0.412174	8.92665	3.11329	0.0114461	0.20154
93782_at	Rnf4	0.217044	9.09736	2.45351	0.0331425	0.583488	161599_i_at	Bop1	-0.242126	7.52128	-3.11293	0.0114529	0.20154
92289_at	Ptprb	0.23708	7.42029	2.45345	0.0331462	0.583488	94369_at	Gnpnat1	-0.482796	7.97529	-3.11276	0.0114562	0.20154
160106_at	Capg	0.272941	8.76497	2.45229	0.0332132	0.583488	99587_at	Rab7	0.1984	9.04388	3.11264	0.0114585	0.20154
92423_at	Pard6a	-0.189198	7.42673	-2.44982	0.0333561	0.583488	161247_f_at	Dgcr2	-0.32651	6.53019	-3.10711	0.011565	0.203127
103703_f_at	NA	-0.32672	7.85424	-2.44787	0.0334694	0.583488	99005_at	Rad1	-0.21306	6.12336	-3.10156	0.0116729	0.204643
104145_at	Tcof1	-0.214584	7.4741	-2.44755	0.033488	0.583488	94932_at	Pdgfa	-0.257092	8.02466	-3.09988	0.0117059	0.204643
162304_r_at	Phf7	-0.175748	5.32601	-2.44692	0.0335249	0.583488	95681_f_at	Ppp1r2	0.321037	5.32052	3.0987	0.0117291	0.204643
96961_at	Pcgf2	-0.173511	6.90835	-2.44675	0.0335343	0.583488	102729_f_at	Hsd3b6	-0.455886	6.84796	-3.0984	0.0117348	0.204643
95791_s_at	Srsf2	0.394159	8.47748	2.44623	0.0335652	0.583488	94106_at	NA	0.438011	7.15328	3.09772	0.0117482	0.204643
102082_at	Gnas	-0.187	6.06092	-2.44601	0.033578	0.583488	161667_r_at	Tmem59	-0.190796	3.21993	-3.09612	0.0117798	0.204643
103693_at	Tirap	-0.203437	5.24361	-2.44588	0.0335852	0.583488	102096_f_at	NA	-0.774372	10.3002	-3.096	0.0117821	0.204643
100924_at	Gata3	-0.311394	6.93274	-2.44512	0.0336297	0.583488	104408_s_at	Sox18	-0.434839	6.26848	-3.09599	0.0117824	0.204643
160198_at	Klhl9	-0.4028	8.00781	-2.44453	0.0336642	0.583488	97980_at	Ltbr	-0.28357	9.34211	-3.08847	0.0119316	0.206947
92895_at	Sim1	-0.271499	5.13513	-2.44413	0.0336879	0.583488	103054_at	Polr2a	0.199912	8.79366	3.08554	0.0119905	0.20768
94056_at	Scd1	-0.701732	11.2107	-2.44277	0.0337675	0.583601	103560_at	Lysmd2	0.26301	4.79479	3.08205	0.0120606	0.208605
104179_at	Arf6	-0.319519	5.88624	-2.44158	0.0338374	0.583601	160671_at	Cln8	0.234765	8.18366	3.07986	0.012105	0.20889
96557_at	Ptch2	-0.194328	6.44255	-2.44138	0.0338493	0.583601	100365_at	Syt7	-0.18394	6.42177	-3.07875	0.0121275	0.20889
95053_s_at	Sdhb	0.218557	11.7428	2.44083	0.0338814	0.583601	100533_s_at	Crem	-0.235844	6.18094	-3.07778	0.0121472	0.20889
99134_at	NA	0.213022	5.54893	2.43982	0.0339409	0.583821	161919_r_at	Rnasek	-0.204353	6.25364	-3.07757	0.0121515	0.20889
92577_f_at	NA	0.285604	11.758	2.43896	0.0339921	0.583897	96764_at	Iigp1	-0.529222	10.9326	-3.07712	0.0121607	0.20889
92625_at	NA	0.223795	11.3321	2.43427	0.0342701	0.587397	93081_at	Rbbp7	0.345579	8.60983	3.07513	0.0122013	0.209299
160867_at	Pdgfrb	-0.215172	6.68538	-2.43394	0.0342899	0.587397	100900_at	Hcfc1	0.243957	8.05355	3.0739	0.0122265	0.209444
161603_r_at	Epb4.1l4a	-0.230722	6.8048	-2.43233	0.0343857	0.588231	161524_r_at	Gpi1	-0.23367	6.84984	-3.07291	0.0122468	0.209504
161249_at	Ap1b1	-0.234696	7.2752	-2.43142	0.0344403	0.58836	101889_s_at	Rora	0.497048	7.1523	3.0679	0.0123501	0.210983
100581_at	Cstb	0.284346	10.5874	2.42917	0.0345749	0.58927	160225_at	Gtf2b	0.351287	7.97189	3.06384	0.0124344	0.211885
96577_i_at	Ubap2l	0.42335	7.43021	2.42896	0.034588	0.58927	98384_at	Ptk6	-0.337078	5.32224	-3.06246	0.0124632	0.211885
161027_f_at	Plekha1	-0.231557	6.82047	-2.42662	0.0347286	0.59086	161515_i_at	Timp2	-0.429451	5.18865	-3.06229	0.0124667	0.211885
161707_f_at	NA	-0.277211	7.55798	-2.42522	0.0348135	0.591497	104731_at	Zfp467	-0.361681	6.22522	-3.0621	0.0124708	0.211885
92959_at	Frk	-0.212692	5.574	-2.42324	0.0349331	0.592723	160405_at	NA	-0.183067	7.32103	-3.06028	0.0125089	0.212244
94532_at	Atp6v1e1	0.16987	10.1664	2.42097	0.0350712	0.593891	93983_at	Derl1	0.239986	8.53674	3.05742	0.0125691	0.212975
93378_at	Hoxc8	-0.244409	6.52701	-2.42055	0.035097	0.593891	98254_f_at	NA	-0.378436	9.78645	-3.05343	0.0126535	0.213343
94668_at	D3Wsu167e	-0.155225	5.79828	-2.41827	0.0352361	0.595437	104131_at	Tpra1	-0.193555	7.00951	-3.05305	0.0126614	0.213343
96052_at	Acp1	0.224438	8.88964	2.41381	0.0355099	0.598222	99343_at	Txlng	-0.252745	4.48568	-3.05221	0.0126794	0.213343
161312_r_at	Lrmp	-0.209974	4.00515	-2.40975	0.0357613	0.598222	96829_at	Wbp1l	0.546434	10.5245	3.05214	0.0126809	0.213343
94196_at	Ikbkg	-0.179987	7.19584	-2.4096	0.0357707	0.598222	103095_at	Grb7	-0.317054	9.73987	-3.05171	0.01269	0.213343
92384_at	Xpa	0.380478	6.3202	2.40928	0.0357902	0.598222	103400_at	Tug1	-0.556691	5.95674	-3.05155	0.0126933	0.213343
103043_at	Mtcp1	-0.228114	7.4231	-2.40728	0.0359152	0.598222	94105_at	Cdc42	0.311308	7.76118	3.04558	0.0128211	0.215201
100539_at	Acot7	0.301615	8.72581	2.40701	0.0359315	0.598222	100758_at	Rps28	0.308638	12.1625	3.03917	0.0129599	0.217131
161112_at	Parp16	-0.193494	7.78151	-2.40605	0.0359919	0.598222	103285_at	Mbd4	-0.230883	4.84588	-3.03866	0.0129708	0.217131
104020_at	Rap2b	-0.218772	7.77694	-2.40521	0.0360443	0.598222	160187_at	Pafah1b2	0.249584	6.92516	3.03595	0.01303	0.21783
160747_at	Rgs3	-0.18644	9.11327	-2.40431	0.0361005	0.598222	99521_at	Ak4	-0.355879	6.21778	-3.03292	0.0130964	0.218647
95016_at	Nrp1	-0.349683	9.05523	-2.40412	0.0361128	0.598222	162160_at	Ide	-0.227216	5.75726	-3.02409	0.013292	0.221616
93328_at	Hdc	0.330277	6.60972	2.404	0.0361202	0.598222	160846_at	Nek6	0.251772	6.1695	3.02145	0.0133511	0.22213
92254_at	Myo5b	0.316969	8.71586	2.40311	0.0361758	0.598222	160657_at	Ilf3	-0.225402	6.63397	-3.02113	0.0133584	0.22213
103701_at	Spice1	-0.175972	7.64174	-2.40304	0.0361804	0.598222	101963_at	Ctsl	0.337007	11.3352	3.01874	0.0134121	0.222702
161749_r_at	Tug1	-0.153564	8.4327	-2.40276	0.0361979	0.598222	100887_at	Smc6	0.34719	6.33305	3.01801	0.0134284	0.222702
96943_at	Gps1	0.188705	9.77884	2.40235	0.0362235	0.598222	162496_r_at	NA	-0.178644	8.93527	-3.01361	0.0135281	0.224057
94899_at	Mprip	0.187501	10.7386	2.40207	0.0362414	0.598222	162251_f_at	Agap1	-0.269565	7.51291	-3.01139	0.0135787	0.224596
92970_at	Hoxa10	-0.199251	5.35853	-2.40179	0.0362589	0.598222	104007_at	Slc25a15	0.413148	10.7897	3.00938	0.0136246	0.225058
103555_at	Chmp4b	0.297414	9.78776	2.40066	0.0363304	0.598222	99633_at	Ncdn	0.356544	7.55785	3.00764	0.0136644	0.225066
94346_at	Wtap	0.455107	5.95174	2.40047	0.0363421	0.598222	96569_at	Fignl1	-0.173579	9.17312	-3.00743	0.0136691	0.225066
101631_at	Sox11	-0.307132	6.04364	-2.39963	0.0363951	0.598222	101589_at	NA	0.329263	5.87287	3.007	0.0136792	0.225066
162239_at	Cmip	-0.20294	5.85491	-2.39943	0.0364076	0.598222	160353_i_at	Mapkapk2	0.558576	4.79029	3.00176	0.0138	0.226745
96611_at	NA	0.245448	10.0719	2.39869	0.0364547	0.598222	160633_at	Alyref	0.311689	6.22505	3.00101	0.0138175	0.226745
100880_at	Gbp7	-0.261907	7.46445	-2.39546	0.0366597	0.600228	100555_at	Rcan1	0.658984	7.84316	2.99855	0.0138748	0.227387
160556_at	Cox16	0.227561	8.10012	2.39502	0.0366872	0.600228	104015_at	Metap1	0.181545	7.36269	2.99611	0.0139317	0.22802
96873_at	Tax1bp1	-0.2056	8.18229	-2.39411	0.0367457	0.600228	104417_at	Flt4	0.468351	7.87657	2.99199	0.0140284	0.229302
97700_at	H2-K1	-0.237024	6.85881	-2.39374	0.0367693	0.600228	96758_s_at	Sec14l2	-0.247706	10.0462	-2.9908	0.0140565	0.229462
95685_at	Wdr74	0.258647	7.7398	2.39091	0.0369498	0.601293	160837_at	Pdlim7	-0.201608	8.80927	-2.98886	0.0141026	0.229912
101811_at	Atoh7	0.18277	8.17667	2.39031	0.0369886	0.601293	103080_at	Samhd1	0.392237	6.12577	2.98321	0.0142371	0.231289
96919_at	Atp6v0c	0.214124	12.2675	2.38943	0.0370451	0.601293	103861_s_at	Ubfd1	-0.271968	7.86601	-2.98278	0.0142475	0.231289
99005_at	Rad1	-0.222574	6.95284	-2.38941	0.0370461	0.601293	160278_at	2810428I15Rik	-0.30373	8.36334	-2.98276	0.014248	0.231289
95927_f_at	2610201A13Rik	0.170148	5.11488	2.38896	0.0370753	0.601293	95114_s_at	Cuta	-0.289924	9.32903	-2.98075	0.0142961	0.231289
97241_at	Ubxn1	0.337568	8.32971	2.38016	0.0376457	0.608978	94469_at	Mat2b	0.237412	8.31617	2.9807	0.0142972	0.231289
100057_at	Nsmce1	0.219378	7.32559	2.37944	0.0376927	0.608978	95011_at	Saysd1	-0.194901	8.56575	-2.98014	0.0143108	0.231289
101254_at	Ran	0.312758	11.1229	2.3794	0.0376954	0.608978	93267_at	Rbm39	0.585224	6.91491	2.9799	0.0143166	0.231289
96633_s_at	Morf4l2	0.256157	8.2572	2.37828	0.0377684	0.609369	104334_at	Adprm	0.322306	8.34645	2.97833	0.0143546	0.231334
94022_at	Gltscr2	0.283053	8.50595	2.37626	0.0379008	0.610101	97254_at	Rbm8a	0.390944	7.66892	2.97712	0.0143836	0.231334
94755_at	Il1a	-0.173842	5.49104	-2.3761	0.0379115	0.610101	161147_f_at	Cmc2	-0.206053	8.15451	-2.97709	0.0143843	0.231334
96097_at	Chmp6	0.206677	9.95264	2.37412	0.0380419	0.611413	97284_at	Bcl2l13	0.303176	8.13158	2.9763	0.0144035	0.231334
93285_at	Dusp6	-0.608917	7.37546	-2.36989	0.0383217	0.615118	94690_at	C79490	-0.185436	5.46516	-2.97595	0.0144121	0.231334
104264_at	Lrba	0.203678	9.64442	2.36756	0.0384767	0.616812	99024_at	Mxd4	-0.329777	9.37583	-2.97271	0.0144907	0.232298
102586_at	Ror1	-0.190644	7.13978	-2.36549	0.038615	0.617677	92567_at	Col5a2	-0.281655	4.52447	-2.97188	0.014511	0.232325
104389_at	1700017B05Rik	-0.2226	6.84188	-2.36461	0.0386739	0.617677	160451_at	Etf1	0.242752	8.11467	2.97016	0.0145531	0.2327
96732_at	Dcaf12	-0.238331	8.73824	-2.36453	0.0386797	0.617677	97316_at	Ehhadh	0.4553	7.5715	2.9671	0.0146281	0.2336
101188_at	Kcnj3	-0.247735	4.3675	-2.36319	0.038769	0.617677	161101_r_at	NA	-0.215737	7.1805	-2.9649	0.0146824	0.23398
93475_at	Spef1	-0.216016	7.59531	-2.36306	0.0387779	0.617677	101601_at	DXErtd223e	-0.201437	5.13363	-2.96448	0.0146928	0.23398
162114_f_at	Med20	-0.156436	7.83737	-2.36066	0.0389398	0.619355	102095_f_at	Spock2	-0.266846	4.35556	-2.96386	0.0147081	0.23398
100483_at	Ifnar1	-0.210136	7.42967	-2.36003	0.0389824	0.619355	93285_at	Dusp6	-1.01722	7.16975	-2.96264	0.0147383	0.234163
100014_at	Tlk2	-0.200307	5.26763	-2.3554	0.0392962	0.621952	94426_at	Thumpd1	0.325862	7.74148	2.9547	0.0149365	0.236539
93918_at	NA	0.388794	5.82273	2.35379	0.039406	0.621952	95564_at	Ccdc117	-0.335186	4.00583	-2.95461	0.0149388	0.236539
102111_f_at	Rpp30	-0.27736	6.49278	-2.3536	0.039419	0.621952	95442_at	Tmem205	-0.35737	12.1885	-2.95438	0.0149447	0.236539
103066_at	Cmpk2	-0.294651	6.22296	-2.35253	0.0394917	0.621952	99807_r_at	Fv1	-0.402437	6.12226	-2.95362	0.0149637	0.23654
102852_at	Cdh2	-0.230189	4.65334	-2.35187	0.0395368	0.621952	103978_at	NA	-0.257191	6.52794	-2.95214	0.0150011	0.23656
97105_at	Zc3h12c	-0.387636	6.20663	-2.35185	0.0395381	0.621952	95529_at	Dbnl	0.246808	8.38966	2.95182	0.015009	0.23656
101963_at	Ctsl	0.332694	10.5328	2.35181	0.0395414	0.621952	97108_at	Recql5	-0.196507	7.4633	-2.95126	0.0150233	0.23656
161530_r_at	Sema4a	-0.219985	5.73524	-2.35176	0.0395444	0.621952	94379_at	Kif1b	-0.278636	4.15355	-2.95057	0.0150408	0.23656
160137_at	NA	-0.219303	8.71993	-2.35033	0.0396427	0.622107	100895_at	Lsg1	0.329237	6.30091	2.94663	0.0151408	0.237713
96641_at	Parl	0.309142	8.95623	2.34888	0.0397424	0.622107	161045_at	Lrrn1	-0.198054	3.3842	-2.94537	0.0151729	0.237713
104589_at	Uri1	0.300766	6.93701	2.34869	0.0397556	0.622107	104037_at	Rwdd4a	0.252592	5.41781	2.94475	0.0151888	0.237713
99106_at	Cops6	0.326262	9.99217	2.34832	0.0397812	0.622107	93674_at	Fgd1	-0.291951	5.75996	-2.94408	0.0152059	0.237713
103863_at	Sft2d1	0.24234	10.7355	2.34749	0.0398381	0.622107	94961_at	Clpx	0.314726	6.39342	2.94395	0.0152092	0.237713
97142_at	DXErtd242e	-0.186105	5.93883	-2.34682	0.0398847	0.622107	101409_at	Eif2d	-0.23504	7.2177	-2.94278	0.0152393	0.237886
100730_at	Cd180	-0.187012	4.55342	-2.34567	0.0399636	0.622107	101307_at	Cyp4a12b	0.248278	8.80326	2.94192	0.0152613	0.237931
96924_at	Wdr82	-0.183734	7.47761	-2.34499	0.0400107	0.622107	95425_at	Acadl	0.416965	7.46973	2.93369	0.0154743	0.240952
160996_at	Foxd1	-0.182339	5.33324	-2.34455	0.0400416	0.622107	161287_f_at	Mybbp1a	0.209619	6.20896	2.93279	0.0154978	0.24101
94915_at	Ppib	0.211794	9.65351	2.34439	0.0400524	0.622107	161284_r_at	Txnrd3	-0.226217	10.7747	-2.93207	0.0155166	0.24101
92782_at	Tmpo	-0.214931	8.03373	-2.34364	0.0401044	0.622141	100095_at	Scarb1	0.416899	10.263	2.93131	0.0155363	0.241015
101207_at	NA	0.187579	12.62	2.34229	0.0401987	0.622831	104034_at	AI464131	-0.265188	6.86969	-2.92974	0.0155775	0.241354
160360_at	Sep15	0.189942	11.409	2.33893	0.040433	0.625684	94850_at	NA	0.246174	5.0347	2.92834	0.0156143	0.241626
92771_at	Zfp207	-0.196322	7.59115	-2.33782	0.0405105	0.626108	99552_at	Snai2	0.295521	7.81449	2.92299	0.0157556	0.24351
161283_i_at	NA	-0.174726	4.00885	-2.33645	0.0406066	0.62628	162358_i_at	Slc25a1	-0.307584	9.06323	-2.92102	0.0158081	0.243738
101044_at	Alad	0.195566	9.0322	2.33623	0.0406219	0.62628	96632_at	Morf4l2	0.220855	9.44284	2.92097	0.0158094	0.243738
102941_at	Uggt1	-0.216044	6.19441	-2.33521	0.0406943	0.6265	103765_at	Zbtb48	0.327778	5.97285	2.91938	0.0158517	0.243852
95956_at	C77068	-0.152261	5.18392	-2.33374	0.0407975	0.6265	104585_at	Crb3	-0.211711	8.83514	-2.91769	0.0158969	0.243852
96014_at	Tmem222	0.232672	8.00209	2.33319	0.0408363	0.6265	95649_at	Phf5a	0.238984	7.26863	2.91672	0.0159229	0.243852
93360_at	Pmm1	0.205023	8.10975	2.3327	0.0408712	0.6265	160313_at	Ythdc1	0.359283	7.07951	2.91431	0.0159877	0.243852
101506_at	Snrpa1	0.19628	6.16441	2.33248	0.040887	0.6265	98020_at	Drg1	0.319134	8.04983	2.91431	0.0159877	0.243852
96956_at	Prdx5	0.184836	12.2695	2.33128	0.0409714	0.627023	97309_at	St13	-0.218142	8.67428	-2.91357	0.0160076	0.243852
92594_at	Ap1g2	-0.183054	6.67341	-2.32909	0.0411269	0.628632	160901_at	Fos	0.522056	4.06814	2.91326	0.016016	0.243852
94508_at	Tmem126a	0.24903	8.58427	2.3282	0.0411905	0.628835	92698_at	Mertk	0.346988	6.12404	2.91309	0.0160206	0.243852
92409_at	Zfp260	-0.256003	5.62143	-2.32623	0.0413312	0.629818	103370_at	Lin7c	0.39026	7.93078	2.91295	0.0160243	0.243852
93532_at	Tnni2	0.173115	5.93535	2.32398	0.0414926	0.629818	101735_f_at	Ang2	0.239429	7.72641	2.91287	0.0160266	0.243852
95924_at	Rab10os	0.202404	7.47139	2.32352	0.0415253	0.629818	95727_at	Apoa5	-0.298706	12.1262	-2.91208	0.016048	0.243852
94503_at	Rab8a	0.197783	9.72873	2.32272	0.0415829	0.629818	93143_at	1190005I06Rik	-0.257624	8.16506	-2.91157	0.0160618	0.243852
103567_at	Fryl	-0.190997	8.35289	-2.32135	0.0416815	0.629818	98600_at	NA	0.290478	6.36334	2.91124	0.0160706	0.243852
92374_at	Adora1	0.289724	5.35517	2.32114	0.0416967	0.629818	102574_at	Fgf11	-0.213885	6.59543	-2.91006	0.0161028	0.244041
99961_s_at	Cdk11b	0.237762	6.79169	2.32106	0.0417021	0.629818	99569_at	Krt85	-0.264526	7.82115	-2.90934	0.0161222	0.244041
160968_at	Aard	-0.196897	7.87503	-2.321	0.0417065	0.629818	98423_at	Gjb2	0.469027	10.7107	2.90677	0.0161921	0.244802
94810_at	Ewsr1	0.227529	9.39992	2.32097	0.0417088	0.629818	162112_i_at	NA	-0.216158	4.16612	-2.90308	0.0162931	0.245466
161357_r_at	Gstm2	-0.193587	9.83902	-2.31923	0.0418343	0.630835	101583_at	Btg2	0.261662	8.76725	2.90246	0.0163103	0.245466
97647_at	NA	0.352519	12.3444	2.31853	0.0418854	0.630835	99902_at	Hcn1	-0.170785	4.37033	-2.9022	0.0163174	0.245466
99360_at	Serac1	-0.209698	6.11489	-2.31794	0.0419277	0.630835	104283_at	Tbc1d15	0.449062	6.63917	2.9012	0.0163448	0.245466
103755_at	Sh3d19	-0.210786	7.42246	-2.31661	0.0420243	0.631527	160789_at	Edem2	-0.188861	8.64624	-2.90104	0.0163493	0.245466
161621_r_at	Cggbp1	-0.186508	6.96885	-2.31483	0.0421537	0.632195	162170_r_at	Fbn1	-0.252948	3.89902	-2.90087	0.0163539	0.245466
99499_at	Mettl1	0.233006	7.28315	2.31442	0.0421841	0.632195	98999_at	Adsl	0.30539	6.58712	2.90004	0.0163768	0.245515
94493_at	Cldn3	0.314623	6.6741	2.31392	0.0422206	0.632195	100964_at	Vti1b	-0.297608	7.95793	-2.89774	0.0164406	0.246175
96836_r_at	Zbtb14	-0.17354	3.59645	-2.31294	0.0422917	0.632501	97302_at	Ivns1abp	0.670488	5.27791	2.89681	0.0164663	0.246266
101680_at	Rpl27a	0.299659	11.3751	2.31148	0.0423989	0.633321	101900_at	Cdkn2b	-0.213029	5.00178	-2.89469	0.0165253	0.246852
99866_at	NA	-0.224888	7.30433	-2.31007	0.042502	0.633321	104411_at	D930048N14Rik	-0.230342	6.03537	-2.89161	0.0166113	0.24784
97197_r_at	AI506816	0.511934	9.96218	2.30974	0.0425264	0.633321	160217_at	Apmap	0.279867	6.97393	2.88794	0.0167142	0.248998
102029_at	Il16	-0.188656	6.53469	-2.30903	0.0425788	0.633321	94041_at	Hnrnpk	0.576364	6.65661	2.88743	0.0167288	0.248998
160094_at	Arpc4	0.248658	9.82798	2.30706	0.0427239	0.633321	93624_at	Slc10a6	0.379564	6.15322	2.88339	0.0168432	0.250121
99135_at	Cdc37	0.234427	9.14225	2.30657	0.04276	0.633321	92189_at	Ufm1	0.241722	7.18173	2.88335	0.0168443	0.250121
103616_at	Col11a2	-0.22644	7.84742	-2.30525	0.0428579	0.633321	162468_at	Rhoc	-0.213173	10.3714	-2.88164	0.0168929	0.250545
94428_at	Ilvbl	0.19257	7.52858	2.305	0.0428761	0.633321	92362_at	Dusp8	0.250133	4.62566	2.87983	0.0169443	0.250649
101982_at	Vasp	-0.178793	8.17931	-2.30452	0.0429122	0.633321	104361_at	Zfp637	-0.267853	7.89928	-2.87983	0.0169444	0.250649
103484_at	Popdc3	-0.200827	4.22811	-2.30448	0.0429145	0.633321	161023_at	Il15ra	0.293933	9.1905	2.87928	0.0169602	0.250649
93158_at	Zfr2	-0.158134	8.90993	-2.30436	0.0429235	0.633321	162366_r_at	C2	-0.3201	4.0838	-2.87733	0.0170162	0.251011
102929_s_at	Flt3l	-0.165413	6.69027	-2.30394	0.0429551	0.633321	101634_at	Npm1	0.402371	9.11954	2.87574	0.0170618	0.251011
94818_at	Ogt	-0.494935	6.98464	-2.30268	0.0430483	0.633854	95864_at	C77815	-0.196284	3.82869	-2.87538	0.017072	0.251011
95109_at	Nop56	-0.223148	6.90817	-2.30208	0.0430927	0.633854	103555_at	Chmp4b	0.338007	8.91943	2.87531	0.0170743	0.251011
162318_r_at	NA	-0.246126	5.47841	-2.30021	0.0432322	0.63454	92209_at	Ulk1	0.36781	7.74561	2.87493	0.0170851	0.251011
102983_at	Smad1	0.345444	6.75015	2.29976	0.0432659	0.63454	160883_at	D2hgdh	-0.20252	7.6375	-2.87174	0.0171773	0.251501
104254_at	Ralgps2	-0.171546	5.18764	-2.29912	0.0433141	0.63454	97115_at	NA	-0.253554	6.83457	-2.87139	0.0171875	0.251501
97407_at	Ubac1	-0.176665	7.06707	-2.29874	0.0433426	0.63454	103269_f_at	Zfp125	-0.310783	5.44025	-2.87101	0.0171985	0.251501
94470_i_at	Slc30a5	-0.199877	7.09543	-2.29544	0.0435898	0.637411	161679_r_at	Terf2ip	-0.232948	3.78169	-2.87099	0.0171991	0.251501
100027_s_at	Pex14	0.18853	9.28414	2.29189	0.043858	0.640441	96964_at	NA	-0.213533	4.79329	-2.86936	0.0172462	0.251895
162424_f_at	Ddx17	-0.305905	7.41789	-2.29134	0.0438995	0.640441	95031_at	Ubr3	0.350527	3.96064	2.86791	0.0172884	0.252166
101231_at	NA	-0.215208	4.95249	-2.28809	0.0441466	0.641798	161548_r_at	Ryk	-0.24322	6.02154	-2.86734	0.0173051	0.252166
92888_s_at	Styx	-0.3162	7.15306	-2.28767	0.0441785	0.641798	96426_at	Tmsb4x	0.838671	9.00773	2.86574	0.0173518	0.252238
97963_at	Sipa1	-0.161973	7.53946	-2.28736	0.0442025	0.641798	103930_at	N4bp1	-0.229282	7.00222	-2.86513	0.0173697	0.252238
103638_at	Fnbp1	-0.237593	5.86378	-2.28662	0.0442587	0.641798	99057_at	Thy1	-0.16876	7.14859	-2.8651	0.0173706	0.252238
96573_at	Actg1	0.246318	11.9131	2.28562	0.0443353	0.641798	93939_at	Sh2b3	-0.211404	5.74105	-2.86254	0.0174458	0.253034
101004_f_at	Srsf3	0.306248	7.00283	2.28547	0.0443471	0.641798	101940_at	Smpd2	0.297074	7.82219	2.86128	0.017483	0.253207
99647_at	NA	-0.190599	6.52336	-2.2854	0.0443523	0.641798	104066_at	Pkdcc	-0.206893	7.23932	-2.86076	0.0174982	0.253207
102963_at	E2f1	-0.169487	6.23043	-2.28031	0.0447439	0.643641	161795_r_at	Prpf39	-0.235022	4.18774	-2.85786	0.0175842	0.254157
104487_at	H2afj	-0.175073	5.94686	-2.28015	0.0447562	0.643641	162399_f_at	Atxn2	-0.528385	8.41536	-2.8539	0.0177019	0.255563
103420_at	Emd	0.19759	8.74375	2.27975	0.044787	0.643641	100973_i_at	NA	-0.356472	6.69849	-2.85151	0.0177735	0.256299
162501_at	NA	-0.218841	8.45597	-2.27952	0.0448049	0.643641	96176_at	Arih2	0.265453	7.64062	2.84982	0.0178243	0.256736
94277_at	Mtx1	0.209852	9.12033	2.27898	0.044846	0.643641	98297_at	Lgr5	-0.231843	4.92891	-2.84865	0.0178595	0.256899
96581_at	Ncam2	-0.165387	5.7749	-2.27801	0.0449218	0.643641	92777_at	Cyr61	-0.22737	4.80704	-2.84808	0.0178768	0.256899
96290_f_at	NA	0.272135	11.9331	2.27779	0.0449384	0.643641	94423_at	Smagp	-0.232027	8.21322	-2.84425	0.0179928	0.25762
160242_at	Flcn	-0.20596	7.71868	-2.27767	0.0449479	0.643641	160166_r_at	Ola1	0.353167	6.39073	2.84414	0.017996	0.25762
94239_at	Pnn	-0.176737	6.16255	-2.27729	0.0449774	0.643641	100339_at	Slc10a1	0.184651	11.7504	2.84398	0.0180009	0.25762
161971_r_at	Btk	-0.272167	4.38219	-2.27706	0.0449951	0.643641	104110_at	Gatad2a	0.244253	8.52754	2.8437	0.0180095	0.25762
94200_at	Gbx2	-0.183195	5.73175	-2.27621	0.0450611	0.643848	161307_f_at	Capn10	-0.179534	4.82562	-2.84201	0.0180609	0.258034
101129_at	NA	0.258932	12.1606	2.27538	0.0451258	0.644036	99963_at	Zfp101	-0.436564	4.48252	-2.84139	0.0180797	0.258034
100903_at	Parp2	0.191323	7.51192	2.27306	0.0453068	0.645578	92345_g_at	Hltf	-0.250148	6.70586	-2.84053	0.018106	0.258044
99603_g_at	Klf10	0.310525	7.41577	2.27267	0.0453373	0.645578	93862_i_at	Defa24	-0.204006	6.89287	-2.83956	0.0181356	0.258044
102980_at	Nmt1	-0.270131	6.78202	-2.26954	0.0455824	0.646655	93133_at	Slc7a3	-0.19696	6.15623	-2.83934	0.0181424	0.258044
96677_at	Setd8	-0.313169	9.37783	-2.26954	0.0455825	0.646655	102796_at	Npm3	0.274084	6.02477	2.83752	0.0181983	0.258259
93583_s_at	Ighm	-0.236299	8.21897	-2.26922	0.0456073	0.646655	93293_at	NA	0.379827	10.6131	2.83693	0.0182163	0.258259
96435_at	Ttf1	-0.174954	8.14079	-2.2685	0.0456639	0.646655	103983_at	Adh4	-0.262926	7.84954	-2.83682	0.0182196	0.258259
100949_at	Fam20c	-0.201916	8.24594	-2.26814	0.0456926	0.646655	161280_r_at	Pelo	-0.193201	8.88451	-2.83575	0.0182528	0.258359
94985_at	Syncrip	-0.35536	5.70988	-2.2654	0.0459091	0.646655	96754_s_at	Etf1	0.473778	9.22627	2.83525	0.018268	0.258359
93725_at	Cxadr	0.187498	6.42517	2.26463	0.0459698	0.646655	104271_at	Gpr182	-0.324923	7.39114	-2.83392	0.018309	0.258646
97521_at	Ass1	-0.209619	9.00547	-2.26445	0.0459841	0.646655	96600_at	Arhgap29	-0.226254	3.69175	-2.83237	0.018357	0.258866
161906_f_at	Coprs	-0.182906	6.22695	-2.26439	0.0459892	0.646655	101281_at	Olfr49	-0.259261	5.81599	-2.83208	0.018366	0.258866
98573_r_at	Ranbp1	0.309128	8.3481	2.26309	0.0460921	0.646655	93139_at	Sdsl	0.201287	7.89228	2.82841	0.0184802	0.259835
103388_at	Mypop	-0.159547	9.71377	-2.26262	0.0461292	0.646655	162323_at	Ndufb7	-0.199266	5.10833	-2.8266	0.0185369	0.259835
104155_f_at	Atf3	0.25947	6.8174	2.26233	0.0461522	0.646655	95995_at	NA	-0.189087	6.02972	-2.82647	0.0185409	0.259835
98508_s_at	Ppap2a	0.240591	9.29514	2.26194	0.0461835	0.646655	161352_r_at	NA	-0.209222	5.53645	-2.8264	0.018543	0.259835
101435_at	Akap2	-0.142276	7.25837	-2.26188	0.0461886	0.646655	160902_at	F8a	0.170932	6.61938	2.82615	0.0185508	0.259835
161219_r_at	NA	-0.210393	7.21736	-2.26186	0.0461897	0.646655	162398_at	NA	-0.201493	7.1612	-2.82523	0.0185797	0.259835
103648_at	Tacstd2	0.440286	8.31241	2.26051	0.0462974	0.647438	93059_at	NA	0.209174	8.18559	2.82521	0.0185804	0.259835
160158_at	Gpc3	-0.266118	7.66269	-2.25698	0.0465799	0.649917	161899_f_at	Lat2	0.297902	5.67561	2.82302	0.0186492	0.260505
96695_at	Ube2a	-0.318395	6.44169	-2.25627	0.0466374	0.649917	95460_at	Cops5	0.415365	7.91184	2.82139	0.0187006	0.26093
94177_at	Hsd17b7	0.265871	6.55566	2.25607	0.0466531	0.649917	95912_at	Rnf2	-0.231239	5.96273	-2.82043	0.0187308	0.26106
104368_at	Mapre3	0.188121	7.80578	2.25361	0.0468514	0.649917	96603_at	Qsox1	0.231546	9.56671	2.81848	0.0187926	0.261366
98087_at	Tbk1	-0.165762	7.18704	-2.2534	0.0468684	0.649917	94558_g_at	Gtf3a	-0.197746	7.93504	-2.81747	0.0188248	0.261366
104157_at	Fastkd5	-0.245995	5.92131	-2.25259	0.0469339	0.649917	103797_at	Cdc7	-0.181931	4.16299	-2.81725	0.0188317	0.261366
97240_g_at	Ubxn1	0.217573	9.62873	2.25246	0.0469438	0.649917	103557_at	Vps37c	0.272253	7.88693	2.81652	0.0188549	0.261366
99985_at	Txnrd1	0.238597	8.59672	2.25226	0.0469604	0.649917	101138_at	Gabrb2	-0.238449	6.43404	-2.81644	0.0188574	0.261366
99927_at	Cfi	0.386782	6.31571	2.25185	0.0469933	0.649917	160900_at	Gkap1	0.256463	4.98286	2.8138	0.0189419	0.261769
160622_at	Mfsd7c	-0.332165	7.5797	-2.25183	0.0469951	0.649917	102142_r_at	Gm14743	-0.267315	5.20534	-2.81377	0.0189427	0.261769
104366_at	Zfp362	0.19937	7.64889	2.25111	0.0470538	0.650008	99544_at	Dguok	-0.2837	6.58913	-2.8135	0.0189512	0.261769
96367_at	C79242	-0.210969	6.62942	-2.24996	0.0471464	0.650018	95349_g_at	Cxcl1	-0.269461	6.47469	-2.81291	0.0189703	0.261769
98117_at	Ndufa1	-0.160629	7.65561	-2.2498	0.0471595	0.650018	94428_at	Ilvbl	0.24799	6.7534	2.8104	0.0190509	0.26235
93603_at	Mrpl40	0.178377	8.03237	2.24917	0.0472106	0.650018	96618_at	Rpp21	-0.260004	7.59574	-2.81029	0.0190544	0.26235
98427_s_at	Nfkb1	-0.188068	8.81845	-2.24714	0.0473763	0.650227	92683_at	Cd3d	0.18814	3.97299	2.80872	0.0191051	0.262663
97882_at	Sec61a1	0.220841	10.2475	2.24559	0.0475027	0.650227	160888_at	Reps1	0.184573	6.57767	2.80828	0.0191192	0.262663
100765_at	Fndc7	-0.182405	7.77489	-2.24537	0.0475209	0.650227	104109_at	Fbxo21	-0.288068	6.92553	-2.80736	0.019149	0.262671
96845_at	Slc30a9	0.214658	7.48638	2.24533	0.047524	0.650227	160266_r_at	Brix1	0.276306	7.21856	2.80696	0.0191618	0.262671
102771_at	Setdb1	-0.180287	6.63387	-2.24521	0.0475336	0.650227	92713_at	Hnf4a	0.365726	8.07779	2.80434	0.0192469	0.263547
101063_at	Tnnc1	-0.242863	5.62133	-2.24516	0.0475382	0.650227	93169_at	Zfp322a	-0.372857	6.15401	-2.79923	0.0194135	0.265537
160676_at	Lrrc58	0.311293	9.11608	2.24115	0.0478671	0.653861	98908_at	Sppl3	-0.196956	7.0189	-2.79816	0.0194487	0.265727
93396_at	Slc4a1ap	-0.217704	5.86936	-2.24065	0.0479086	0.653861	102666_at	Tyr	-0.244659	4.03743	-2.79566	0.0195309	0.266559
160417_at	Kif5b	-0.312812	8.2517	-2.23596	0.048297	0.657647	98934_at	l7Rn6	-0.238277	8.12111	-2.79499	0.0195531	0.266571
103346_at	Clk2	-0.178034	7.42364	-2.23526	0.0483548	0.657647	92503_at	Hus1	-0.227684	5.22163	-2.79256	0.0196335	0.267375
92396_at	Insig1	-0.216693	4.1552	-2.23365	0.0484887	0.657647	92579_at	Ssb	0.583048	5.14189	2.79175	0.0196605	0.267451
103848_at	Crkl	-0.209337	6.8196	-2.23364	0.0484903	0.657647	95454_at	S100a1	-0.240355	4.65271	-2.79038	0.0197059	0.267778
100739_at	Spi16	-0.207797	4.6237	-2.2336	0.0484933	0.657647	104220_at	Smad6	-0.214856	7.17136	-2.78888	0.019756	0.267792
94663_at	Slco5a1	-0.182854	5.74699	-2.23246	0.0485885	0.657647	103050_at	Tcf21	-0.243152	6.73828	-2.78857	0.0197663	0.267792
98333_at	Rps18	0.1982	12.4368	2.23043	0.0487585	0.657647	93688_at	Cmah	-0.321706	5.6041	-2.78738	0.0198062	0.267792
161297_f_at	Vpreb1	-0.217675	7.0228	-2.23037	0.0487639	0.657647	96224_at	Btrc	-0.236173	6.19694	-2.78678	0.0198263	0.267792
95677_at	Snrnp40	0.210387	7.00008	2.23	0.0487945	0.657647	94427_at	Copg1	0.45081	7.5126	2.78581	0.0198588	0.267792
95348_at	Cxcl1	-0.341695	7.03519	-2.22951	0.0488356	0.657647	94274_at	Ube2s	0.220717	7.57039	2.78537	0.0198734	0.267792
103024_at	Adam8	-0.185807	7.12379	-2.22926	0.0488571	0.657647	160818_at	Lrrfip2	0.172109	8.08092	2.78488	0.01989	0.267792
99481_at	Atp1a2	-0.210218	6.44493	-2.22923	0.0488593	0.657647	96197_f_at	Tox4	0.298232	6.13494	2.78453	0.0199016	0.267792
100979_at	Rnf138	0.221251	6.75709	2.22909	0.0488706	0.657647	161964_r_at	Prkcz	-0.254398	8.94167	-2.78387	0.0199238	0.267792
101330_f_at	Igkv15-103	-0.215437	5.61419	-2.22563	0.0491623	0.660542	92882_at	Rab1	0.291501	7.6111	2.78357	0.0199342	0.267792
96156_at	Snhg6	0.324895	8.979	2.22529	0.0491916	0.660542	96059_at	Mrpl48	0.289608	6.67399	2.78331	0.0199429	0.267792
94837_at	Eif3c	0.211696	10.3963	2.2239	0.0493088	0.661405	97334_at	Hes6	-0.442214	8.04502	-2.78183	0.0199929	0.268175
94910_at	Nde1	-0.341111	6.68573	-2.2228	0.0494025	0.661742	161174_i_at	Krt81	-0.181366	5.92818	-2.77909	0.0200854	0.269081
101901_at	Mpdu1	0.222911	7.30622	2.22208	0.0494633	0.661742	98911_at	Jak1	0.184577	8.22159	2.77856	0.0201035	0.269081
93257_at	Ddx1	0.227487	7.549	2.22174	0.0494928	0.661742	96257_at	Hp1bp3	0.299939	8.60982	2.77567	0.0202019	0.270108
93147_f_at	Celf4	-0.208178	5.45575	-2.22043	0.0496041	0.662001	160202_at	Atp6ap2	0.233504	6.46563	2.77344	0.0202783	0.270785
97818_at	Snx4	0.20904	8.23587	2.21972	0.0496643	0.662001	96102_i_at	Rad23b	0.503985	8.52262	2.77292	0.0202959	0.270785
96962_at	Rpl6	0.228769	12.0353	2.21901	0.0497254	0.662001	97544_at	Ywhaz	0.222322	9.72906	2.76936	0.0204184	0.272129
92724_at	Hnrnpa1	0.275725	6.23167	2.21894	0.0497313	0.662001	95731_at	Sesn1	0.37978	6.82829	2.76446	0.0205883	0.274101
100425_at	Syk	-0.189809	9.04547	-2.2182	0.0497949	0.662001	96574_at	Il9	-0.183378	6.34394	-2.762	0.020674	0.274524
98928_at	Coro1b	0.201555	8.24638	2.21778	0.0498303	0.662001	96981_at	Olfr1507	-0.212315	5.53174	-2.76198	0.0206746	0.274524
94849_at	Mif	-0.175754	6.04139	-2.21509	0.0500617	0.662016	98824_at	Irs1	-0.161327	4.00112	-2.76166	0.020686	0.274524
101607_at	C80068	-0.221456	6.39358	-2.21474	0.0500914	0.662016	103449_at	Lsm14b	0.295108	7.53403	2.76046	0.0207279	0.274788
94112_at	Tnfsf10	-0.147887	5.32304	-2.21466	0.0500984	0.662016	93127_at	Phgdh	-0.224667	5.67812	-2.75949	0.020762	0.274948
95137_at	Tmem97	0.263667	8.46283	2.21414	0.0501435	0.662016	160809_at	Tollip	0.270181	7.5655	2.75476	0.0209286	0.27686
97098_at	Tha1	-0.18094	6.24706	-2.2138	0.0501724	0.662016	100309_at	Met	-0.257114	4.55241	-2.7532	0.0209837	0.277293
93800_f_at	Krt27	-0.159517	5.34093	-2.2136	0.0501902	0.662016	104661_at	Tmem245	-0.231214	4.984	-2.75258	0.0210057	0.277293
99158_at	Ostf1	0.231504	9.55504	2.21202	0.0503264	0.662016	96084_at	Hnrnpdl	0.472368	6.43683	2.7513	0.0210511	0.277599
96966_at	Ighm	-0.224859	4.30881	-2.21157	0.050365	0.662016	101009_at	Krt8	0.230289	9.51733	2.7482	0.0211617	0.278763
92915_s_at	NA	-0.183665	8.37984	-2.21121	0.0503963	0.662016	96329_at	Puf60	0.225653	8.26169	2.74397	0.0213137	0.28022
100895_at	Lsg1	0.243508	6.57361	2.21077	0.0504342	0.662016	94968_at	Nfyc	0.248722	8.40364	2.74387	0.0213172	0.28022
162287_r_at	Clca3	-0.253619	5.45534	-2.21059	0.0504503	0.662016	98770_at	Cenpc1	-0.233906	5.74972	-2.74198	0.0213855	0.280571
99485_at	Dffa	-0.182969	6.64164	-2.21039	0.0504676	0.662016	97680_at	Mug-ps1	-0.222252	12.3665	-2.74084	0.0214266	0.280571
103029_at	Pdcd4	0.40523	7.98303	2.20908	0.0505814	0.662813	102430_at	Myd88	0.206827	7.22945	2.74081	0.0214278	0.280571
95771_i_at	Fzd4	0.333061	5.89587	2.20826	0.0506523	0.662893	96245_at	Ddx56	0.260522	7.73284	2.74064	0.0214342	0.280571
103421_at	Frrs1	-0.246166	7.32862	-2.20778	0.0506937	0.662893	162391_r_at	Ltc4s	-0.218307	3.65459	-2.73983	0.0214633	0.280571
161421_r_at	Grwd1	-0.24661	5.36755	-2.20605	0.0508447	0.664172	103553_at	Mcm10	-0.196026	5.98115	-2.7388	0.0215007	0.280571
103821_at	Cdc6	-0.179864	6.11905	-2.20467	0.0509657	0.665058	102326_at	Ncf2	0.278131	4.97987	2.73879	0.0215011	0.280571
102308_at	Tulp3	-0.205157	9.09276	-2.20372	0.0510488	0.665446	99894_at	Ptgfrn	-0.221633	5.12954	-2.7376	0.0215446	0.280597
160323_at	Sra1	0.319866	8.38876	2.20129	0.0512621	0.66753	162428_i_at	S100a14	-0.208059	9.79957	-2.7375	0.0215481	0.280597
93789_s_at	Sin3b	0.243668	9.40441	2.19962	0.0514097	0.668754	160188_at	Nudt4	0.362606	9.83556	2.73543	0.0216235	0.280973
102215_at	Ift81	-0.192356	7.80185	-2.19885	0.0514775	0.668766	97194_at	AA408251	-0.179644	6.51403	-2.73446	0.021659	0.280973
94270_at	Krt18	0.418463	7.09318	2.19828	0.0515275	0.668766	102789_at	Gata2	-0.230046	7.49187	-2.73436	0.0216626	0.280973
101013_at	NA	0.199864	12.1464	2.19714	0.0516285	0.668766	96728_at	Wdr45	0.161622	7.45282	2.73372	0.0216862	0.280973
97527_at	Cks2	-0.289149	8.00359	-2.19633	0.0517002	0.668766	102642_at	Slc11a2	-0.181754	7.62606	-2.73344	0.0216963	0.280973
98015_at	Scamp3	0.187536	8.79507	2.19632	0.0517012	0.668766	102817_at	Zrsr1	-0.157804	6.78218	-2.73302	0.021712	0.280973
94224_s_at	NA	-0.473731	7.489	-2.19598	0.0517319	0.668766	98420_at	Impa2	-0.172345	5.58307	-2.7299	0.0218267	0.281415
97871_at	Ero1l	-0.224104	8.44939	-2.19532	0.0517905	0.668831	95729_at	Apoa5	-0.230007	10.6261	-2.72958	0.0218387	0.281415
101023_f_at	Sdhaf1	0.286613	9.18192	2.19445	0.0518677	0.669136	160785_at	Arhgap21	-0.223799	6.67584	-2.72948	0.0218423	0.281415
95482_at	Usp7	0.166535	8.07371	2.19275	0.0520188	0.670393	161381_r_at	Ncoa4	-0.23754	3.94166	-2.7289	0.0218635	0.281415
103032_at	Tpst1	-0.155897	7.53685	-2.19142	0.0521376	0.671134	160697_at	C77080	-0.205963	8.09059	-2.72879	0.0218676	0.281415
96035_at	Bckdha	0.226959	8.79513	2.19091	0.0521838	0.671134	92849_at	Ccl6	0.304877	6.35312	2.72835	0.021884	0.281415
101009_at	Krt8	0.170494	9.38739	2.18942	0.0523172	0.672157	98508_s_at	Ppap2a	0.697987	7.51246	2.72731	0.0219227	0.281415
94162_at	Ddx4	-0.172996	4.87974	-2.18798	0.0524468	0.673085	103636_at	Pnkd	-0.260816	10.414	-2.72658	0.0219495	0.281415
99426_at	Hoxd9	0.191212	8.23449	2.18639	0.0525898	0.673085	93757_at	Srpr	0.339527	10.6362	2.72505	0.0220064	0.281415
162084_i_at	NA	-0.180029	7.51596	-2.18593	0.0526307	0.673085	160463_at	Ppp1r15a	0.19956	7.5258	2.72369	0.0220569	0.281415
104246_at	Asxl1	-0.215874	8.14068	-2.18554	0.0526668	0.673085	162021_r_at	Bcl2l10	-0.231097	8.48607	-2.72346	0.0220655	0.281415
99541_at	Kif11	-0.205337	6.1562	-2.18476	0.0527366	0.673085	96254_at	Dnajb1	-0.516002	6.80549	-2.72345	0.0220659	0.281415
96298_f_at	Dynll1	-0.28671	10.9829	-2.18421	0.0527867	0.673085	101528_at	Tcea1	0.239213	7.31131	2.72256	0.0220992	0.281415
95913_at	Akap17b	-0.214722	5.05206	-2.18414	0.052793	0.673085	104090_at	Cdc23	-0.263364	4.99708	-2.72241	0.022105	0.281415
101542_f_at	Ddx3x	0.338384	9.03853	2.18316	0.0528816	0.673085	96326_at	Tat	0.59695	12.6821	2.72236	0.0221066	0.281415
98455_at	Atf2	-0.277092	8.40739	-2.18278	0.0529164	0.673085	98247_at	Aak1	-0.232438	6.71047	-2.72236	0.0221067	0.281415
94917_at	Fbxo8	0.261154	5.17086	2.18265	0.0529284	0.673085	96735_at	Stard10	-0.229697	11.8468	-2.72073	0.0221678	0.281805
103501_at	Pura	-0.399708	9.55585	-2.18179	0.0530061	0.673388	95408_at	Hypk	0.203011	8.21067	2.72027	0.022185	0.281805
161885_f_at	Gramd3	-0.300732	5.02298	-2.17862	0.0532953	0.676119	98535_at	Comt	-0.29139	10.8946	-2.71974	0.022205	0.281805
101985_at	Plg	0.497941	5.68674	2.17755	0.0533926	0.676119	96913_at	Hadhb	0.390341	10.0853	2.71863	0.0222467	0.281824
99957_at	Mmp9	-0.159847	7.20279	-2.1775	0.0533974	0.676119	94236_at	Nisch	0.252486	8.83154	2.71816	0.0222643	0.281824
98090_at	Krr1	-0.160463	5.62844	-2.17685	0.0534569	0.676119	104393_at	Fam220a	-0.195824	7.10859	-2.71666	0.0223209	0.281824
97448_at	NA	0.180219	7.96021	2.17617	0.0535188	0.676119	102046_at	Srsf10	-0.23853	5.66656	-2.71651	0.0223266	0.281824
97265_at	Smim20	0.207374	9.59273	2.17588	0.053546	0.676119	101498_at	Impa1	-0.373913	7.59198	-2.71589	0.0223499	0.281824
98424_at	Ptpn13	-0.227638	7.71722	-2.17515	0.0536124	0.676274	94507_at	Acsl1	0.411086	9.02804	2.71562	0.02236	0.281824
97683_at	NA	-0.155269	6.96905	-2.17354	0.0537609	0.676663	96269_at	Idi1	-0.758322	8.87477	-2.7155	0.0223645	0.281824
99874_at	Rap2b	-0.158419	6.14595	-2.17284	0.0538248	0.676663	96503_at	Krt84	-0.17856	7.25319	-2.71208	0.0224945	0.283164
101481_at	Rnf34	0.21427	6.44609	2.17261	0.0538461	0.676663	161227_r_at	NA	-0.230642	9.20087	-2.71151	0.0225161	0.283164
161227_r_at	NA	-0.170024	9.48882	-2.1715	0.0539494	0.676663	95675_at	Map4k3	0.339176	6.92577	2.70853	0.02263	0.284141
98881_at	Hdhd2	-0.230155	7.61061	-2.17106	0.0539897	0.676663	92738_at	Gdnf	-0.234209	6.87585	-2.70828	0.0226394	0.284141
103708_at	Eif1a	0.302839	7.25747	2.17024	0.0540655	0.676663	94046_at	Csk	-0.19379	8.1909	-2.70579	0.0227351	0.285056
101482_at	Ppp1cc	0.166638	9.05615	2.17008	0.0540803	0.676663	98478_at	Ccng2	0.304732	7.41578	2.70507	0.0227625	0.285114
101221_at	Rab3il1	-0.247464	6.10244	-2.16999	0.0540887	0.676663	160769_at	Derl2	-0.326535	7.99348	-2.70442	0.0227878	0.285145
96692_at	Fgfr1op2	-0.212897	7.29868	-2.16898	0.0541824	0.676663	100469_at	Nfya	-0.222379	6.79571	-2.70281	0.0228498	0.285454
102319_at	Snx12	0.217638	6.28593	2.16887	0.0541924	0.676663	94257_at	Rraga	0.301291	7.43414	2.70259	0.0228582	0.285454
98097_r_at	NA	-0.23148	5.43156	-2.16638	0.0544242	0.676663	160249_at	Tpd52	0.173623	5.59103	2.70154	0.0228988	0.285674
103974_at	Tmprss2	0.198787	8.68826	2.16608	0.0544521	0.676663	96540_at	Mlph	-0.20317	6.61258	-2.70062	0.0229346	0.285835
102988_at	Inppl1	-0.163679	9.01292	-2.16555	0.0545013	0.676663	160283_at	Rsl1d1	0.350773	7.80485	2.69952	0.0229772	0.286081
98923_at	Rcl1	0.197663	6.6912	2.16526	0.0545288	0.676663	161874_r_at	NA	-0.198839	9.22959	-2.69847	0.0230182	0.286306
161190_r_at	1110057K04Rik	-0.254774	4.66574	-2.16512	0.0545418	0.676663	94024_at	Cdt1	0.180353	7.38598	2.69393	0.0231953	0.287088
103896_f_at	Igfbp1	0.741422	6.25447	2.16497	0.054556	0.676663	161083_at	Taok3	-0.193033	6.7293	-2.69284	0.0232383	0.287088
102093_f_at	NA	0.201034	7.76566	2.16488	0.0545643	0.676663	103804_at	Reck	-0.196895	6.65109	-2.69188	0.023276	0.287088
96887_at	Ndufb11	0.247759	10.9456	2.16422	0.054626	0.676755	160889_at	Tmem168	0.261797	4.88319	2.6915	0.023291	0.287088
104119_at	Fam13b	-0.190909	6.42273	-2.16299	0.0547405	0.677502	96696_at	Prmt1	0.391697	6.55432	2.69109	0.0233074	0.287088
102750_at	Apba3	-0.247859	7.74002	-2.16205	0.0548295	0.677931	99906_at	Esx1	-0.163466	5.4846	-2.69024	0.0233407	0.287088
99133_at	Slc3a2	0.267326	10.9439	2.15997	0.0550248	0.67957	95596_at	Foxk2	-0.15558	6.28114	-2.68963	0.0233646	0.287088
93226_i_at	NA	-0.177235	3.38592	-2.15948	0.0550709	0.67957	95446_at	Sfr1	0.242098	8.82475	2.68924	0.0233801	0.287088
161212_r_at	Agtr2	-0.205904	3.97384	-2.15864	0.05515	0.679653	95097_at	Actr10	0.436261	7.87101	2.68923	0.0233807	0.287088
94827_at	Fxyd2	0.173379	12.6961	2.15795	0.055215	0.679653	99850_at	NA	-0.215207	5.10862	-2.68913	0.0233846	0.287088
94210_at	Timm13	0.218501	10.9303	2.15688	0.0553164	0.679653	103326_at	Tbcel	-0.311262	8.41004	-2.68847	0.0234107	0.287088
93735_f_at	Psmc3	0.262003	8.99104	2.15607	0.055393	0.679653	98594_at	1190002N15Rik	-0.694324	6.3241	-2.68824	0.0234196	0.287088
103925_at	Mllt3	-0.209181	7.15363	-2.15598	0.0554016	0.679653	93407_at	Abcc6	-0.232201	7.7267	-2.68783	0.0234359	0.287088
160456_at	NA	-0.185251	4.59609	-2.15574	0.0554241	0.679653	95990_at	NA	-0.193846	6.27717	-2.68716	0.0234625	0.287088
161483_r_at	NA	-0.209058	4.50745	-2.15495	0.0554998	0.679653	103486_at	Il1b	-0.300499	5.10497	-2.68715	0.0234629	0.287088
102642_at	Slc11a2	-0.185785	8.80274	-2.15424	0.0555667	0.679653	161591_r_at	Gal	-0.302014	6.37628	-2.68695	0.0234708	0.287088
98876_at	Mrpl11	0.209877	7.60528	2.15423	0.0555674	0.679653	96698_at	Psmd5	-0.221554	8.84642	-2.68693	0.0234719	0.287088
102419_at	Rarg	-0.166556	7.41066	-2.15335	0.0556512	0.680012	103922_f_at	Cyb5r1	0.239675	3.98416	2.68542	0.0235318	0.28731
104516_at	Cldn5	-0.237921	7.19148	-2.15192	0.0557875	0.681012	93760_at	Cript	0.386021	8.53179	2.68531	0.023536	0.28731
92190_at	Nr2c1	-0.19722	5.90254	-2.14973	0.0559972	0.682138	98512_at	Banp	-0.268955	8.20878	-2.68458	0.0235653	0.287386
104201_at	Plac1	-0.199494	6.63942	-2.14933	0.0560355	0.682138	103312_f_at	Esf1	0.455241	5.80269	2.68241	0.023652	0.287822
161557_at	Mnat1	-0.164103	8.69748	-2.149	0.0560667	0.682138	96652_at	Mrpl28	-0.20612	8.68753	-2.6819	0.0236724	0.287822
98054_at	Ecm1	0.15502	4.54944	2.14825	0.0561392	0.682138	104611_at	Wdr26	0.185655	6.74288	2.68152	0.0236874	0.287822
93306_at	Mapre1	-0.230083	9.28291	-2.14775	0.0561869	0.682138	93500_at	Alas1	0.743911	10.8626	2.68075	0.0237183	0.287822
161710_r_at	Slc38a10	-0.158764	3.71417	-2.14754	0.0562076	0.682138	160277_at	Stx12	0.210678	8.25318	2.68058	0.0237251	0.287822
102431_at	Mapt	-0.278018	10.2448	-2.14666	0.0562915	0.682493	99982_at	Nfkbib	0.316149	8.59057	2.68023	0.0237394	0.287822
103977_at	F10	0.170578	5.22768	2.1456	0.0563937	0.682595	94089_at	NA	-0.216582	4.92554	-2.67877	0.0237978	0.287975
161153_r_at	Renbp	-0.226308	5.57945	-2.14485	0.0564667	0.682595	103738_at	BC037034	-0.190801	9.42771	-2.67867	0.0238019	0.287975
97944_f_at	Trav9d-3	-0.177989	9.07041	-2.14464	0.0564862	0.682595	102768_i_at	Sc5d	-0.491587	9.30662	-2.67819	0.0238211	0.287975
103819_at	Shd	0.178921	7.40979	2.14431	0.0565185	0.682595	162010_r_at	Atf2	-0.320891	3.67693	-2.67746	0.0238508	0.288054
161566_r_at	Asgr1	-0.231928	5.74375	-2.14355	0.0565925	0.682828	161014_at	Terf2ip	-0.190753	5.58737	-2.6752	0.0239421	0.288878
99544_at	Dguok	-0.228354	7.24911	-2.14186	0.0567554	0.684132	98130_at	Txn2	-0.20608	10.0656	-2.6738	0.023999	0.289285
104373_at	Pds5b	-0.166172	4.14967	-2.14091	0.0568476	0.684584	98485_at	Rhpn2	-0.393937	4.92736	-2.67276	0.0240411	0.289442
104018_at	Lct	-0.218772	4.84461	-2.13997	0.0569395	0.685029	92319_i_at	NA	-0.204214	3.96483	-2.67233	0.0240584	0.289442
161437_f_at	Dtd2	-0.195536	6.20484	-2.13861	0.0570719	0.685056	102122_f_at	NA	-0.26635	5.23604	-2.67045	0.0241352	0.290087
98458_at	Smim1	0.349255	8.56658	2.13728	0.0572013	0.685056	161859_f_at	Sncg	-0.214644	7.9116	-2.66971	0.0241653	0.29017
99618_at	Uqcr11	0.365437	11.1157	2.13715	0.057214	0.685056	93782_at	Rnf4	0.312126	8.92678	2.66783	0.0242423	0.290449
95551_at	R3hcc1	0.212961	8.10129	2.13653	0.0572753	0.685056	102737_at	Edn1	-0.221563	5.59877	-2.66772	0.0242468	0.290449
97339_at	Git1	0.185087	8.89314	2.13636	0.0572918	0.685056	92660_f_at	Ube2e1	0.316187	6.11844	2.66612	0.0243125	0.290449
103534_at	Hbb-b2	-0.302195	10.1137	-2.13557	0.0573692	0.685056	94785_at	D7Ertd128e	-0.19861	5.95728	-2.66598	0.0243185	0.290449
101382_at	Pbx2	-0.154283	6.49197	-2.13483	0.057442	0.685056	93509_at	Ube2b	0.264595	8.0944	2.66591	0.0243213	0.290449
95010_at	Traf3	-0.15511	7.03993	-2.13459	0.0574653	0.685056	162145_r_at	Pgs1	-0.232235	6.74543	-2.66574	0.0243281	0.290449
102364_at	Jund	0.34684	12.0293	2.13388	0.057535	0.685056	101887_at	Agt	0.258342	12.1628	2.66423	0.0243905	0.290506
103678_at	Sbno1	-0.180196	9.35811	-2.13368	0.0575549	0.685056	160814_at	Thap4	-0.170885	8.6399	-2.66383	0.0244068	0.290506
160595_at	Rpap3	0.160944	5.99326	2.13327	0.0575945	0.685056	94432_at	St6gal1	-0.254295	8.48788	-2.66345	0.0244228	0.290506
101451_at	Peg3	0.241239	7.28792	2.13322	0.0576	0.685056	98033_at	Plbd1	0.404129	8.68545	2.66337	0.0244259	0.290506
104135_at	Arl3	0.388837	8.58204	2.13185	0.0577348	0.686006	94844_at	Rpl39	-0.186916	5.06621	-2.66166	0.0244968	0.290852
93993_at	Lman2	0.249834	8.41821	2.13129	0.0577903	0.686013	100007_at	Irf2bp1	-0.157898	8.51569	-2.66154	0.0245016	0.290852
160258_at	Pam16	0.202394	9.28092	2.12966	0.0579512	0.686068	104243_r_at	Dtd2	0.172789	4.49116	2.65991	0.0245694	0.29138
92292_at	Slc2a3	-0.148747	7.34613	-2.12955	0.0579618	0.686068	98599_at	Hdgfrp2	0.1963	7.0768	2.65722	0.0246814	0.292
162346_f_at	H2-DMa	-0.181835	8.70701	-2.12812	0.0581033	0.686068	101094_at	Higd1a	0.291762	6.54338	2.65651	0.0247108	0.292
92943_at	Gria1	-0.179836	6.00511	-2.12806	0.0581097	0.686068	99269_g_at	Tdo2	0.73965	12.406	2.65643	0.0247142	0.292
100727_at	NA	0.220109	12.2467	2.12761	0.0581543	0.686068	96341_at	Syf2	0.265831	8.13723	2.65586	0.024738	0.292
96871_at	Slmo2	0.194797	8.17097	2.12692	0.0582229	0.686068	161447_f_at	Pgrmc2	-0.236423	4.89762	-2.65489	0.0247786	0.292
95304_at	Uevld	-0.14952	4.24387	-2.12669	0.0582453	0.686068	99018_at	Bclaf1	0.164483	3.54495	2.65461	0.0247905	0.292
92436_at	Srpk3	-0.15604	6.89794	-2.12567	0.0583475	0.686068	101614_at	NA	-0.218629	4.73071	-2.65374	0.0248271	0.292
104174_at	Enpp1	0.20249	7.37652	2.12549	0.0583654	0.686068	101301_at	NA	-0.185977	7.13036	-2.65373	0.0248276	0.292
98107_at	Coro1c	0.233137	9.10872	2.12485	0.0584292	0.686068	94489_at	NA	0.639481	9.98847	2.65362	0.0248322	0.292
92701_at	Bmp1	-0.236511	7.62058	-2.12442	0.0584722	0.686068	102833_at	Cbx2	-0.252711	7.61352	-2.65192	0.0249037	0.292389
98840_at	Bmx	-0.163247	4.95264	-2.12352	0.058562	0.686068	97863_at	Hgsnat	0.217951	7.42211	2.65172	0.0249121	0.292389
93924_f_at	NA	0.285512	7.2932	2.12264	0.0586493	0.686068	94395_at	Fubp1	-0.425304	4.35671	-2.64985	0.0249907	0.292907
160668_at	Ogfr	0.171645	8.71285	2.12213	0.058701	0.686068	160265_at	Eif5	0.630367	8.4792	2.64833	0.0250554	0.292907
104362_at	Ube2o	-0.13983	8.58946	-2.12206	0.0587072	0.686068	161860_f_at	Naa38	-0.259406	6.10338	-2.64776	0.0250793	0.292907
92340_at	Adra1b	0.210709	6.9981	2.1219	0.0587238	0.686068	97463_g_at	NA	-0.348545	9.21347	-2.64708	0.0251082	0.292907
100094_at	Supt5	0.228787	8.41003	2.12185	0.0587289	0.686068	161815_f_at	NA	-0.571576	11.8442	-2.64696	0.0251134	0.292907
95024_at	Usp18	-0.163036	6.40713	-2.11963	0.0589516	0.687107	102056_f_at	2610002J02Rik	-0.292889	7.15814	-2.64669	0.0251248	0.292907
162246_r_at	Gss	-0.186835	8.10386	-2.11898	0.0590165	0.687107	93780_at	Acot13	-0.220541	8.22726	-2.64661	0.0251284	0.292907
96535_at	Zbtb45	-0.15759	7.55917	-2.11857	0.0590584	0.687107	94095_at	NA	-0.233687	6.00904	-2.64624	0.0251439	0.292907
161502_r_at	Smyd5	-0.189014	7.29094	-2.11739	0.0591771	0.687107	97782_at	Defb2	-0.175209	7.27855	-2.64383	0.0252467	0.293832
93048_at	Clpp	0.223928	9.36276	2.11724	0.0591926	0.687107	103829_at	Herc2	0.25371	6.03494	2.64194	0.0253274	0.294463
101363_at	Adora2a	-0.191687	8.29785	-2.1171	0.0592064	0.687107	104698_at	Gata6	0.235026	6.66901	2.64098	0.0253686	0.294463
162394_r_at	Insl3	-0.220205	7.18675	-2.11687	0.0592302	0.687107	94821_at	Xbp1	-0.240336	9.41459	-2.64091	0.0253718	0.294463
101078_at	Bsg	0.19532	11.2363	2.11601	0.0593172	0.687107	161630_i_at	Mrpl15	-0.249845	5.66236	-2.63728	0.0255279	0.295836
94356_at	Trp53bp1	-0.261047	6.84337	-2.11452	0.0594681	0.687107	95068_at	Dnaja2	0.42709	7.38122	2.63695	0.0255424	0.295836
99502_at	Zfp148	-0.163914	7.39419	-2.11449	0.059471	0.687107	101937_s_at	Clk4	0.330743	5.05873	2.63651	0.0255611	0.295836
97737_f_at	Nlrx1	0.195989	7.06311	2.1137	0.059551	0.687107	160305_at	Psmd11	0.26885	8.68976	2.63521	0.0256175	0.296214
100346_at	Fgf9	-0.179736	6.00166	-2.11294	0.0596282	0.687107	160859_s_at	Nfib	-0.312295	8.09426	-2.63341	0.0256957	0.296684
101069_g_at	Mkrn1	0.330386	8.37775	2.11238	0.0596851	0.687107	161937_r_at	Rnf220	-0.403224	8.01544	-2.63267	0.0257277	0.296684
103706_at	Sfxn2	0.160817	9.00053	2.11216	0.0597073	0.687107	104316_at	Gna13	0.228492	5.22706	2.63263	0.0257294	0.296684
93447_at	Gm10046	-0.180234	7.75283	-2.1118	0.0597446	0.687107	103975_at	Grem2	-0.171866	5.56213	-2.63095	0.0258026	0.297177
102378_at	Sspn	0.210764	5.73748	2.11165	0.0597596	0.687107	98789_at	Cdkn2a	-0.213602	7.41888	-2.63056	0.0258197	0.297177
93250_r_at	Hmgb2	0.245559	4.18439	2.10986	0.0599419	0.687107	101064_at	Plrg1	0.35206	7.09921	2.62976	0.0258546	0.297304
93023_f_at	NA	-0.260394	7.72242	-2.10959	0.0599698	0.687107	95936_at	NA	-0.20593	5.48738	-2.62755	0.0259517	0.298146
100631_r_at	Gstm5	-0.187952	9.92701	-2.10847	0.0600847	0.687107	99965_at	Vdr	-0.191276	6.60456	-2.62519	0.0260553	0.298865
162222_r_at	Eif4e	-0.299847	6.54131	-2.1084	0.0600918	0.687107	96529_at	Synrg	-0.186868	6.44096	-2.62384	0.026115	0.298865
161741_r_at	Zfp503	0.141298	3.30013	2.10836	0.0600959	0.687107	101894_s_at	Aktip	-0.202619	3.86086	-2.62358	0.0261263	0.298865
101135_at	Calcr	-0.252674	4.38963	-2.10826	0.0601053	0.687107	100628_at	Ndufc1	-0.26625	9.83902	-2.62343	0.0261332	0.298865
98385_at	Ptpn14	-0.235827	6.34581	-2.10752	0.0601814	0.687107	103333_at	G6pc	0.616034	11.8842	2.62341	0.0261339	0.298865
96731_at	Ddx6	-0.231965	7.54369	-2.10706	0.0602287	0.687107	161613_at	Chmp7	-0.20919	7.0104	-2.62081	0.026249	0.299628
104601_at	Thbd	-0.222309	4.95246	-2.10655	0.0602811	0.687107	97427_at	Mbl2	0.197119	10.6413	2.62058	0.0262593	0.299628
94869_at	Aebp2	-0.257874	7.75681	-2.10618	0.0603187	0.687107	94913_at	G3bp2	0.214054	6.83378	2.62028	0.0262726	0.299628
162240_r_at	NA	0.172251	3.90099	2.10561	0.0603775	0.687107	102887_at	Tnfrsf11b	-0.197535	5.2169	-2.61837	0.0263579	0.300326
96701_at	Uba2	0.194909	7.72235	2.10482	0.0604594	0.687107	95599_at	St3gal4	0.239426	9.21182	2.61738	0.0264019	0.300553
104094_at	Pdlim4	0.136411	7.02244	2.10449	0.0604931	0.687107	97365_at	Coro2b	-0.169744	5.78152	-2.61559	0.0264817	0.300647
95382_at	AI646383	-0.170173	4.36548	-2.10435	0.0605073	0.687107	104252_at	AU020206	0.230543	6.34697	2.61486	0.0265146	0.300647
102781_at	Ccnl2	-0.211458	8.1852	-2.10414	0.0605296	0.687107	104594_at	S100a14	-0.181885	5.88379	-2.61483	0.0265162	0.300647
98410_at	Irgm2	-0.272866	7.87196	-2.10311	0.0606357	0.687107	93754_at	Ech1	0.208738	10.6144	2.61393	0.0265565	0.300647
161014_at	Terf2ip	-0.226764	6.41957	-2.10263	0.0606853	0.687107	162031_f_at	Galm	-0.188154	9.64795	-2.61391	0.0265571	0.300647
99147_at	Znhit1	0.227932	9.15645	2.10193	0.0607575	0.687107	98325_at	AA517545	-0.226032	3.23039	-2.61199	0.0266438	0.300647
162392_r_at	Ift88	-0.174619	10.1192	-2.10177	0.0607739	0.687107	160110_at	Wwp2	0.173609	8.19883	2.61168	0.0266576	0.300647
102952_g_at	Cradd	0.228874	7.06577	2.10153	0.0607986	0.687107	101093_at	Col4a1	0.347944	8.71034	2.61142	0.0266696	0.300647
94787_at	Auh	-0.185023	8.28486	-2.10061	0.0608944	0.687567	104451_at	Slc11a2	-0.174232	6.94648	-2.61063	0.0267051	0.300647
99124_at	Timm10b	-0.166974	7.39089	-2.09812	0.0611533	0.689866	92217_s_at	NA	0.245392	4.44812	2.60914	0.0267723	0.300647
160271_at	Atraid	0.224711	9.76493	2.0969	0.0612806	0.690678	102126_at	NA	0.261104	11.5505	2.6091	0.0267743	0.300647
103557_at	Vps37c	0.185589	8.92587	2.09244	0.0617474	0.695313	95898_at	Cdh4	-0.17625	7.08069	-2.60861	0.0267963	0.300647
162336_r_at	Acp6	-0.188175	7.79231	-2.09042	0.0619595	0.697073	101338_f_at	NA	-0.182638	8.20902	-2.60854	0.0267994	0.300647
97258_at	Lactb2	0.402471	7.65252	2.08978	0.0620277	0.697211	93451_at	Lmo7	-0.396368	7.45281	-2.6085	0.0268015	0.300647
99835_at	Fosl1	-0.19162	6.02168	-2.08645	0.0623796	0.700537	103530_at	Fancg	-0.243618	4.33991	-2.60845	0.0268036	0.300647
94550_at	Snx1	0.156048	8.84676	2.08417	0.0626228	0.702636	97148_at	NA	-0.233847	4.86431	-2.60815	0.0268174	0.300647
103849_at	Crkl	-0.142054	5.896	-2.08069	0.0629945	0.706172	104612_g_at	Wdr26	0.299557	6.78943	2.608	0.0268242	0.300647
161006_at	Slco3a1	-0.165025	8.93074	-2.07863	0.0632152	0.706735	161835_at	S100g	-0.253753	5.05038	-2.6067	0.0268831	0.300647
160954_at	Syn2	-0.167548	7.58617	-2.0754	0.0635633	0.706735	103741_at	Hoxd10	-0.208669	6.89539	-2.60653	0.026891	0.300647
103485_at	Nynrin	-0.251513	6.51968	-2.07454	0.0636564	0.706735	161497_f_at	Itga7	-0.169439	8.06549	-2.60651	0.0268916	0.300647
94108_at	Pik3c2g	-0.132649	4.78542	-2.07449	0.0636618	0.706735	97101_at	Myl6b	-0.172166	5.56988	-2.60381	0.0270149	0.301755
95028_r_at	NA	-0.344568	8.13372	-2.07332	0.0637878	0.706735	161949_at	Ift46	-0.190558	9.69362	-2.60218	0.0270897	0.30232
99018_at	Bclaf1	0.154462	3.61231	2.07293	0.0638305	0.706735	100064_f_at	Gja1	0.232173	5.99014	2.60092	0.0271474	0.302535
98958_at	Eny2	0.219464	6.42988	2.07269	0.0638569	0.706735	100016_at	Mmp11	-0.177152	5.4912	-2.60063	0.0271608	0.302535
104330_g_at	Arid1a	-0.244249	6.931	-2.07253	0.0638738	0.706735	161793_at	Lama4	-0.225655	5.31725	-2.60017	0.0271816	0.302535
104749_at	Rnf20	-0.172884	6.37499	-2.07242	0.0638859	0.706735	97924_at	Gne	-0.215653	9.24051	-2.59814	0.027275	0.302669
103958_g_at	Tfrc	-0.169175	10.2243	-2.0724	0.0638876	0.706735	95665_at	Sec14l1	-0.248069	6.47799	-2.59795	0.027284	0.302669
96868_at	Fgb	0.549817	4.58408	2.07092	0.0640485	0.706735	92580_at	Hars	0.262048	6.52627	2.59775	0.0272934	0.302669
100451_at	Hsf1	-0.151122	7.82027	-2.07036	0.0641093	0.706735	102861_at	Slc22a18	-0.290792	9.66075	-2.59741	0.0273091	0.302669
98478_at	Ccng2	-0.326193	7.5826	-2.06891	0.0642683	0.706735	96511_s_at	Vav1	0.212432	5.66682	2.59728	0.0273149	0.302669
99505_at	Rab4b	0.273857	8.04882	2.06859	0.0643024	0.706735	100573_f_at	Gpi1	-0.291287	7.41047	-2.59582	0.0273825	0.303142
101159_at	Mitf	-0.151412	6.03276	-2.0675	0.0644216	0.706735	100912_at	Dph5	0.256071	6.24568	2.59494	0.0274234	0.303142
101412_at	Sh3gl3	-0.147247	6.97291	-2.06748	0.0644237	0.706735	102883_at	Rpap1	-0.202725	6.79212	-2.59479	0.0274303	0.303142
101887_at	Agt	0.184313	9.7197	2.06742	0.0644312	0.706735	103465_f_at	Saa2	0.916029	9.60531	2.59263	0.0275306	0.303662
104187_at	Mbd6	-0.178047	8.65898	-2.06713	0.0644623	0.706735	161716_at	Fos	-0.249364	5.44536	-2.59253	0.0275352	0.303662
104515_at	5730508B09Rik	-0.176632	5.52227	-2.06713	0.0644623	0.706735	92814_at	Cyp2j5	-0.570113	5.86817	-2.5922	0.0275507	0.303662
103682_at	Uri1	0.384868	5.16092	2.06707	0.0644688	0.706735	93257_at	Ddx1	0.610446	6.71589	2.59152	0.0275824	0.303662
96017_at	NA	0.243153	10.1015	2.06489	0.0647085	0.706735	102838_at	Sell	-0.223273	6.32283	-2.59116	0.027599	0.303662
96020_at	C1qb	0.442887	8.18176	2.06408	0.0647968	0.706735	102992_at	H2-Ke6	-0.198884	5.72574	-2.5902	0.027644	0.303889
102277_at	Zfp26	-0.207566	5.62926	-2.06382	0.0648254	0.706735	95592_at	Fam96b	-0.280712	7.43433	-2.58864	0.0277168	0.304311
101883_s_at	NA	0.408951	4.96179	2.06381	0.0648265	0.706735	95315_at	Zfp14	-0.153625	4.50554	-2.58834	0.0277311	0.304311
102922_at	Pitpnc1	-0.262832	7.16491	-2.06303	0.0649124	0.706735	160474_at	Rpp14	0.213744	6.65729	2.58697	0.0277955	0.30475
95749_at	Manf	-0.311774	8.87451	-2.06299	0.0649176	0.706735	99647_at	NA	-0.234668	5.36659	-2.58638	0.0278233	0.304788
97200_f_at	Snrpe	0.265369	8.9196	2.06295	0.0649214	0.706735	161385_r_at	Tph1	-0.312695	3.39189	-2.58543	0.027868	0.30501
96797_s_at	Fbxw5	0.151136	9.66626	2.06257	0.064964	0.706735	99124_at	Timm10b	-0.170889	6.63773	-2.58407	0.0279323	0.305445
103416_at	Mapk6	0.171969	7.91862	2.06207	0.0650182	0.706735	97146_g_at	Erlin1	-0.225201	5.21368	-2.58282	0.0279911	0.30582
98800_at	Slc23a3	0.305335	8.73082	2.06197	0.0650294	0.706735	93600_at	Leprot	0.200544	6.34236	2.57967	0.0281409	0.307188
162366_r_at	C2	-0.246524	4.42351	-2.06183	0.0650454	0.706735	92228_at	Ctnna2	-0.198158	7.77826	-2.57764	0.0282375	0.307753
96704_at	Sfn	0.244222	7.80249	2.06148	0.0650843	0.706735	162113_r_at	Vamp7	-0.250852	6.98187	-2.57755	0.0282419	0.307753
160972_at	Serpinb9e	-0.186538	7.23923	-2.06125	0.0651089	0.706735	96641_at	Parl	0.295795	8.40776	2.57693	0.0282715	0.307807
162438_f_at	Desi1	-0.155254	7.26461	-2.06085	0.0651538	0.706735	96196_i_at	Tox4	0.2021	7.64456	2.57242	0.0284879	0.309681
160613_at	Tinagl1	0.285192	8.97999	2.06083	0.0651563	0.706735	95714_at	Sf3b6	0.419286	7.86661	2.5721	0.0285033	0.309681
94298_at	Tsta3	0.194279	7.86781	2.06069	0.065171	0.706735	93967_at	Anapc11	-0.176657	8.1728	-2.5718	0.028518	0.309681
92511_at	Aanat	-0.156686	7.25034	-2.06062	0.0651789	0.706735	98808_at	Neurod2	-0.190458	8.06975	-2.57036	0.0285874	0.310165
92444_f_at	Zfp1	0.160109	7.69534	2.06004	0.065243	0.706735	103421_at	Frrs1	0.190397	6.20709	2.56899	0.0286534	0.310611
100623_at	Clca3	-0.175676	4.80701	-2.05996	0.0652518	0.706735	100671_at	Ifna11	-0.249473	3.89497	-2.56759	0.0287216	0.31108
94467_at	NA	-0.244655	4.51869	-2.05913	0.0653438	0.707117	161062_r_at	Rufy3	-0.265598	5.56296	-2.56459	0.0288676	0.31239
94462_at	Eif2b1	0.232995	7.11277	2.05817	0.065451	0.707261	97178_at	AI314034	-0.179166	8.66387	-2.56356	0.0289177	0.312662
104046_at	Arih1	-0.372587	7.70452	-2.05799	0.0654704	0.707261	160208_at	Sf3b3	0.221619	7.42925	2.56302	0.0289441	0.312677
97725_at	Bmpr1b	-0.141891	4.79732	-2.057	0.065581	0.707844	99847_at	St3gal1	-0.215533	8.07248	-2.56249	0.0289703	0.312689
96613_at	Fam96a	0.263594	8.58821	2.05634	0.0656543	0.707877	100935_at	Mlx	0.211004	8.23104	2.56021	0.0290824	0.313627
104101_at	Slc9a8	-0.265124	10.1708	-2.05595	0.0656974	0.707877	104506_at	Nr1i3	0.241298	9.16339	2.55609	0.0292855	0.315149
93770_at	Cyp3a11	0.522693	4.41905	2.05542	0.0657563	0.7079	104474_s_at	Oprl1	-0.1757	6.31689	-2.5556	0.02931	0.315149
96941_at	Ift27	0.226852	8.72314	2.05368	0.0659506	0.708516	94636_at	Hoxa13	-0.163536	6.95166	-2.55505	0.0293372	0.315149
95588_at	Amacr	-0.251971	8.78874	-2.05319	0.0660059	0.708516	92276_at	Map3k6	0.265069	7.02308	2.55434	0.0293724	0.315149
92198_s_at	NA	-0.169797	4.79535	-2.05294	0.0660343	0.708516	101061_at	Ssr2	0.348578	7.93839	2.55422	0.0293782	0.315149
161929_at	NA	-0.172133	6.25239	-2.05228	0.0661072	0.708516	101422_at	Fnbp4	0.308975	6.43144	2.55402	0.0293882	0.315149
94528_at	Nubp1	0.213416	8.02653	2.0519	0.0661503	0.708516	162425_f_at	Irf3	-0.257297	5.33547	-2.55336	0.0294211	0.315149
98061_at	Nudt16l1	0.20088	8.64579	2.05187	0.0661539	0.708516	98507_at	Nr1d1	0.328354	7.79094	2.55272	0.0294527	0.315149
93225_s_at	Cyp21a1	-0.159614	9.34935	-2.05062	0.0662938	0.709287	97950_at	Xdh	0.327414	8.08874	2.55235	0.0294715	0.315149
102309_at	Zfp326	-0.137763	6.81421	-2.05022	0.0663395	0.709287	161156_r_at	Col1a2	-0.238222	9.29446	-2.55177	0.0295002	0.315149
95448_at	Psmc2	0.302199	9.13	2.04911	0.066464	0.710011	98021_at	Polr1e	0.195417	4.89263	2.55175	0.0295011	0.315149
97993_at	Uros	-0.153595	8.24277	-2.04796	0.0665939	0.710187	93467_at	Cachd1	-0.197615	7.09671	-2.55121	0.0295281	0.315168
95136_at	Arl6ip4	0.219631	8.07644	2.04768	0.0666251	0.710187	93518_at	Rnps1	0.23292	8.97762	2.5493	0.0296238	0.315188
103023_at	Lcat	0.227076	6.70632	2.04665	0.0667422	0.710187	99930_s_at	Psen2	-0.318142	10.5861	-2.54928	0.029625	0.315188
95395_at	Ythdf3	-0.419336	5.92638	-2.04609	0.0668049	0.710187	94002_at	Cul1	0.297926	7.99417	2.5491	0.0296336	0.315188
94796_at	Psmd11	0.293046	9.53073	2.04608	0.0668069	0.710187	98433_at	Bid	-0.255721	5.54436	-2.5482	0.0296791	0.315188
103011_at	Sin3a	-0.154578	8.78049	-2.04594	0.0668217	0.710187	99360_at	Serac1	-0.202511	5.95045	-2.54818	0.0296797	0.315188
96240_at	Tmem106c	-0.204008	8.45419	-2.0438	0.067065	0.712167	160373_i_at	Sdpr	0.360273	5.44918	2.54742	0.0297183	0.315188
160212_at	Ttc4	-0.139701	7.46845	-2.04255	0.0672073	0.713071	103928_at	Sgol1	-0.1807	6.26329	-2.5462	0.0297797	0.315188
95716_at	Ywhag	-0.26815	9.69518	-2.04148	0.0673294	0.713275	104279_at	Polr2f	-0.179655	9.11572	-2.54607	0.0297859	0.315188
103665_at	Elovl6	-0.276258	8.69537	-2.04138	0.0673407	0.713275	161418_r_at	Nr5a1	-0.266587	4.49179	-2.54572	0.0298036	0.315188
98515_at	Gtf2e2	-0.154487	6.72931	-2.04083	0.0674038	0.713338	93769_at	Necap2	0.181339	8.0209	2.54536	0.029822	0.315188
98084_at	Arl2bp	0.167877	10.2659	2.03878	0.0676383	0.714751	98617_at	Wbp11	0.206298	7.84301	2.54505	0.0298372	0.315188
92567_at	Col5a2	-0.202011	6.91667	-2.03834	0.0676882	0.714751	161549_f_at	C1qtnf1	-0.220767	6.67896	-2.54467	0.0298564	0.315188
95939_i_at	Fam105a	0.211465	6.67361	2.03816	0.0677091	0.714751	96970_at	NA	-0.179174	7.18235	-2.54464	0.0298581	0.315188
97790_s_at	Lama3	-0.205801	6.89667	-2.03626	0.0679268	0.715542	162215_f_at	Sdc2	-0.176595	3.91926	-2.54355	0.0299132	0.315504
103743_at	Limch1	-0.181393	6.75645	-2.036	0.0679575	0.715542	160682_at	NA	-0.276093	7.77696	-2.54242	0.0299705	0.315545
160537_at	Sult1d1	0.362785	9.55412	2.03536	0.0680312	0.715542	95799_s_at	NA	-0.187801	5.75552	-2.54145	0.0300196	0.315545
104573_at	Bola2	0.263657	9.12335	2.03435	0.0681471	0.715542	102750_at	Apba3	-0.375501	7.38965	-2.54126	0.0300293	0.315545
93313_at	Map2k3	-0.17488	4.73598	-2.03429	0.0681542	0.715542	97868_at	Dnaja3	0.30711	9.27225	2.54125	0.0300295	0.315545
93533_at	Ssu72	0.166072	8.50678	2.03417	0.0681685	0.715542	92790_at	Kpna2	0.326694	5.40891	2.54063	0.0300615	0.315545
95470_at	Pak1ip1	0.140775	7.02587	2.03402	0.0681851	0.715542	101102_at	Igbp1	0.274401	7.42154	2.54048	0.0300688	0.315545
97331_at	Capn10	-0.13966	8.49105	-2.03337	0.0682602	0.715729	94502_at	Med10	0.256669	6.86288	2.53846	0.0301715	0.316108
162009_f_at	Msh2	-0.167586	7.13787	-2.03131	0.0684989	0.716001	100587_f_at	Cdip1	0.589937	6.5771	2.53843	0.0301731	0.316108
94998_at	Rala	-0.200759	6.70689	-2.03127	0.0685034	0.716001	101101_at	Ppp2cb	0.298609	7.23363	2.53726	0.0302329	0.316108
98453_at	Flt1	0.157503	8.39871	2.03117	0.0685146	0.716001	96486_at	NA	-0.314177	6.57106	-2.53719	0.0302367	0.316108
96804_at	Nop2	-0.147365	8.93767	-2.03117	0.0685154	0.716001	100729_at	Gm15772	0.325072	10.7107	2.53676	0.0302588	0.316108
94860_at	Timm17a	0.256757	9.34544	2.02959	0.0686988	0.717317	103710_at	Zfp942	-0.282594	4.43278	-2.53645	0.0302743	0.316108
92377_at	Drc1	-0.156784	4.9084	-2.02674	0.0690304	0.720176	92531_at	Sec62	-0.253956	5.49525	-2.53569	0.0303133	0.316251
95658_at	Commd1	0.207205	7.05637	2.02561	0.0691621	0.720252	103595_at	Zfp524	-0.202025	7.22748	-2.53327	0.0304377	0.317225
95674_r_at	Basp1	-0.144912	10.7611	-2.02553	0.0691725	0.720252	162070_r_at	Cyp24a1	-0.292124	4.3077	-2.53288	0.0304575	0.317225
160110_at	Wwp2	0.210955	8.71144	2.0252	0.0692107	0.720252	101546_at	Neu1	-0.233372	6.99418	-2.53231	0.0304869	0.317267
94935_at	Tbl1x	-0.171874	6.79023	-2.02451	0.0692913	0.720491	95079_at	Pdgfra	0.158527	6.52557	2.53019	0.0305966	0.317564
93210_g_at	Nek4	-0.215938	5.5839	-2.02335	0.069428	0.721312	100779_at	Il12b	-0.149768	6.62727	-2.53017	0.0305975	0.317564
97180_f_at	Hbb-y	-0.167798	6.23358	-2.0221	0.0695743	0.721909	99380_at	Kcna2	-0.148055	6.09913	-2.5301	0.030601	0.317564
92907_at	Ocln	0.139663	6.33018	2.02187	0.0696011	0.721909	161026_s_at	Sytl4	-0.248107	5.02705	-2.52931	0.0306423	0.317564
101943_at	Tceb3	0.180118	8.19549	2.02036	0.0697796	0.72316	97914_at	Hspa9	0.412622	9.42231	2.52918	0.0306489	0.317564
101942_at	Sugp2	-0.184152	8.51931	-2.01931	0.0699031	0.723839	97505_at	Arl1	0.254106	8.10703	2.52881	0.030668	0.317564
98993_at	Ppp2r5c	0.197279	8.98921	2.01792	0.0700673	0.724938	160065_s_at	Csrp1	0.597989	6.02569	2.52762	0.0307296	0.317581
162425_f_at	Irf3	-0.21818	5.41597	-2.01716	0.0701584	0.725147	95412_at	Pdcd6	0.296665	8.08472	2.52746	0.0307382	0.317581
92814_at	Cyp2j5	-0.347295	6.78938	-2.01677	0.0702036	0.725147	162177_f_at	NA	0.227735	6.33595	2.52634	0.0307965	0.317581
100904_at	Mettl17	-0.144096	8.71379	-2.01615	0.0702774	0.725309	92281_at	2510002D24Rik	-0.254558	8.22498	-2.52615	0.0308062	0.317581
101854_r_at	Bag6	0.141717	8.25174	2.0151	0.0704022	0.725998	95041_at	Josd2	-0.259508	8.12901	-2.52606	0.0308107	0.317581
98610_at	Mrps28	0.277382	7.69072	2.01286	0.0706701	0.728149	101708_at	Myo1f	-0.225262	6.80856	-2.52584	0.0308222	0.317581
162165_f_at	Pagr1a	-0.179037	8.80206	-2.01238	0.0707274	0.728149	161578_r_at	NA	-0.315371	6.08486	-2.52323	0.0309586	0.318162
101040_at	Capn2	0.201701	6.86873	2.01061	0.0709392	0.729245	100289_at	Efna3	-0.161254	9.28359	-2.52267	0.0309878	0.318162
162399_f_at	Atxn2	-0.257134	7.66878	-2.00924	0.0711031	0.729245	98840_at	Bmx	-0.233384	4.6825	-2.52185	0.0310308	0.318162
94020_at	Twf2	-0.203481	7.12073	-2.00913	0.0711168	0.729245	161577_f_at	Ccdc96	-0.227036	4.08829	-2.52173	0.0310371	0.318162
94049_at	Bhmt	0.831444	5.41056	2.00762	0.0712982	0.729245	104328_at	Aqp9	0.214198	9.56632	2.52151	0.0310488	0.318162
97718_at	Ctla4	-0.146144	4.77598	-2.00753	0.0713086	0.729245	100516_at	Chka	-0.281258	8.11855	-2.52054	0.0310995	0.318162
100153_at	Ncam1	0.157754	7.54582	2.00753	0.071309	0.729245	99996_at	Pkp1	-0.184477	5.74543	-2.52054	0.0310997	0.318162
98587_at	Nap1l1	-0.230728	8.59983	-2.00735	0.0713301	0.729245	104076_at	Smim11	-0.239346	5.96084	-2.52049	0.0311024	0.318162
100944_at	AW112010	-0.303839	6.56575	-2.00718	0.0713508	0.729245	99913_at	Chad	-0.156122	7.63347	-2.52038	0.0311079	0.318162
96490_at	Rhbdl3	-0.155188	6.24818	-2.00711	0.0713595	0.729245	93030_at	NA	0.579107	9.81946	2.51961	0.0311488	0.318319
101976_at	Cops4	0.18385	8.7428	2.00619	0.0714698	0.729775	98107_at	Coro1c	0.179302	8.03153	2.51796	0.0312357	0.318947
104092_at	Usp48	0.202351	7.74111	2.00437	0.0716895	0.731092	93070_at	Ipo5	0.319877	6.3088	2.51744	0.0312629	0.318964
95625_at	Slc6a8	0.225978	8.4174	2.00377	0.0717626	0.731092	98471_f_at	Kifc1	-0.198599	8.50962	-2.51528	0.0313776	0.319872
103493_at	Nmb	0.131789	6.21877	2.00367	0.0717744	0.731092	160245_at	Zfp740	0.24195	7.09152	2.51308	0.0314942	0.320799
94465_g_at	Clcn3	-0.183505	7.71396	-2.00231	0.0719399	0.731365	160683_at	Slc25a36	0.175765	5.45411	2.51258	0.0315213	0.320813
101581_at	Ube3a	-0.227931	5.88968	-2.00177	0.0720053	0.731365	160968_at	Aard	-0.163727	7.29287	-2.50848	0.0317403	0.322407
93742_at	Tsen15	-0.179085	7.39653	-2.00131	0.0720613	0.731365	102932_at	Nr5a2	-0.302101	5.37604	-2.50831	0.0317494	0.322407
161611_f_at	Emid1	-0.126785	7.72755	-2.00108	0.0720888	0.731365	103963_f_at	Iigp1	-0.343553	9.22565	-2.50755	0.0317901	0.322407
96241_at	Abhd17a	-0.157274	7.79795	-2.00083	0.0721199	0.731365	99465_at	Mecp2	0.250109	5.8921	2.5073	0.0318034	0.322407
104536_at	Smad2	0.238044	7.35208	2.00039	0.0721733	0.731365	100989_at	Itgb1bp1	-0.158789	7.10311	-2.50724	0.0318069	0.322407
96802_at	Pdcd7	-0.179728	7.31389	-1.99961	0.0722682	0.731365	102816_at	Serpina3m	0.627875	11.0399	2.50597	0.031875	0.322598
103829_at	Herc2	-0.203803	6.45377	-1.9996	0.0722697	0.731365	160844_at	Pts	-0.347578	7.80085	-2.50554	0.0318984	0.322598
99670_at	Bad	0.261874	7.32357	1.99676	0.072617	0.733715	103907_at	Nedd4l	-0.257935	7.88727	-2.50545	0.0319033	0.322598
100527_at	Coa3	0.41995	9.79565	1.99674	0.0726194	0.733715	92878_at	Commd3	-0.182206	6.53547	-2.50242	0.0320667	0.323988
99514_at	Bmyc	0.238336	8.17066	1.99384	0.0729754	0.735401	96692_at	Fgfr1op2	-0.235282	6.30435	-2.50131	0.0321272	0.324337
160980_at	2700097O09Rik	-0.215847	5.72646	-1.99333	0.0730378	0.735401	92978_s_at	Serpinb2	-0.238553	4.79955	-2.49976	0.0322115	0.324501
161565_r_at	Pafah2	-0.128332	4.11784	-1.99329	0.073043	0.735401	104456_at	NA	0.179765	5.38176	2.49974	0.0322123	0.324501
160287_at	Map1lc3b	0.191903	9.00905	1.99282	0.073101	0.735401	97405_at	Rps6ka1	-0.203847	7.63378	-2.49861	0.0322739	0.324501
162418_r_at	Atad3a	-0.156971	8.28494	-1.99268	0.0731174	0.735401	96591_at	Reln	0.426587	7.02401	2.49848	0.0322812	0.324501
101548_at	Synj2bp	-0.143183	4.44175	-1.99246	0.0731455	0.735401	161450_r_at	Psen1	-0.17805	3.46049	-2.49819	0.0322967	0.324501
92504_at	Hus1	-0.15184	9.14407	-1.99203	0.0731985	0.735401	98369_f_at	Gm10845	-0.307152	9.66196	-2.49807	0.0323034	0.324501
160918_at	S100g	-0.350954	9.50058	-1.98992	0.073459	0.737424	162281_at	Fdps	-0.199057	5.7775	-2.49767	0.0323253	0.324501
94861_at	4930453N24Rik	-0.140439	5.79446	-1.98912	0.0735579	0.737824	93093_at	Mcl1	-0.41563	6.998	-2.49619	0.0324065	0.325054
97349_at	Frmd6	-0.220817	5.84079	-1.98832	0.0736571	0.738226	161258_at	NA	-0.212646	7.20677	-2.49451	0.0324983	0.325713
103253_at	Lin7b	-0.150597	7.1883	-1.98765	0.0737403	0.738468	161933_r_at	Ddx24	-0.179637	7.86779	-2.49186	0.0326444	0.326915
93899_at	Rps6kb1	0.184836	6.01705	1.98507	0.0740622	0.740873	160755_at	Kif2c	-0.203717	5.19594	-2.49131	0.0326749	0.326958
160488_at	Msh3	-0.161647	7.68076	-1.9846	0.0741199	0.740873	95655_at	Nabp1	-0.240331	3.58885	-2.4903	0.0327305	0.327071
101609_at	Slc5a11	-0.149807	8.6358	-1.98429	0.0741585	0.740873	160376_at	Trp53inp2	0.55565	9.15048	2.49015	0.0327385	0.327071
99069_at	Ntrk2	-0.159559	6.37936	-1.98292	0.0743298	0.741632	160139_at	Hspb8	0.234553	10.4227	2.48842	0.0328344	0.327767
98083_at	Klf6	0.258062	7.37445	1.98274	0.0743532	0.741632	92763_at	Abcb7	-0.247953	3.70225	-2.48736	0.0328936	0.328095
160344_at	Npc2	0.209688	10.1285	1.98178	0.0744729	0.742233	96198_at	Prkcz	-0.191673	7.54336	-2.48607	0.0329655	0.32855
101502_at	Tgif1	0.176242	7.47735	1.98036	0.0746521	0.742984	97269_f_at	Krtcap2	-0.268353	9.61171	-2.48469	0.0330424	0.329054
160768_at	D030056L22Rik	-0.321916	7.68522	-1.98023	0.0746673	0.742984	161293_r_at	Psme1	-0.260296	4.10041	-2.48279	0.0331484	0.329846
160979_at	Ctbp2	-0.387846	7.60127	-1.97893	0.0748317	0.743086	92417_at	Rasal1	-0.256299	7.12267	-2.48223	0.0331797	0.329895
162102_r_at	Mcm5	-0.144647	9.55003	-1.97872	0.0748576	0.743086	103889_at	Tbl1xr1	0.386356	6.76413	2.48158	0.0332163	0.329997
102823_at	Ighg	-0.212098	5.85095	-1.97851	0.0748839	0.743086	161047_at	Atp5d	-0.162752	6.27106	-2.48097	0.0332505	0.330073
104701_at	Bhlhe40	0.295577	8.06496	1.97826	0.0749156	0.743086	102780_at	Srxn1	0.189662	6.28224	2.48044	0.0332803	0.330107
103338_at	Parp6	-0.157536	6.22496	-1.97679	0.0751017	0.743894	161690_at	Gzmg	-0.148884	3.31509	-2.47863	0.0333825	0.330676
98944_at	Sec23b	0.142124	9.43642	1.97659	0.0751265	0.743894	97958_at	Zmynd8	-0.254025	4.29911	-2.47848	0.0333907	0.330676
94848_at	Mif	-0.162992	4.82751	-1.97595	0.075208	0.743894	161614_r_at	Tubb2a	-0.259156	8.11552	-2.4752	0.0335762	0.332251
92693_at	Nin	-0.189147	5.25348	-1.9757	0.0752394	0.743894	96234_at	Cpsf3	0.198003	7.56001	2.47351	0.033672	0.332679
96491_at	Zfyve16	-0.136784	6.85892	-1.97526	0.0752949	0.743894	161197_r_at	Rtcb	-0.194064	5.50641	-2.4735	0.0336728	0.332679
93685_at	1810013L24Rik	-0.146454	5.29799	-1.97471	0.0753645	0.743993	97181_f_at	NA	-0.32474	8.73204	-2.47168	0.0337766	0.33344
94765_at	Rdh13	-0.152797	7.01708	-1.97151	0.0757716	0.745387	104389_at	1700017B05Rik	0.28523	6.54348	2.47112	0.0338082	0.333488
101688_at	D4Ertd58e	-0.216313	6.55966	-1.97142	0.0757831	0.745387	96018_r_at	Zdhhc5	-0.259719	6.47096	-2.46926	0.033915	0.334021
97772_at	Plau	-0.126264	7.16067	-1.9714	0.0757863	0.745387	94281_at	Cnot2	0.2393	7.45866	2.46925	0.0339156	0.334021
97235_f_at	Apobec2	0.176807	3.68927	1.97131	0.0757978	0.745387	103316_at	Camsap1	-0.246177	5.84693	-2.46611	0.0340959	0.334945
96010_at	Kpna3	-0.304081	7.59026	-1.97126	0.0758041	0.745387	103767_f_at	Rrm2b	-0.193844	6.02211	-2.46561	0.0341243	0.334945
161673_r_at	NA	-0.141528	4.52949	-1.96983	0.0759858	0.746586	161847_r_at	2210016L21Rik	-0.202914	8.07207	-2.46493	0.0341639	0.334945
97445_at	Ppid	-0.244662	7.03805	-1.96913	0.0760754	0.746879	101960_at	Rtcb	0.344252	7.01983	2.46489	0.034166	0.334945
161200_i_at	NA	-0.177648	5.14931	-1.96706	0.0763411	0.746981	161595_at	Zeb1	0.238673	6.173	2.46447	0.0341902	0.334945
99052_at	Zeb1	-0.195214	6.50292	-1.9668	0.0763742	0.746981	160425_at	Mterf3	0.276325	5.71838	2.46439	0.0341948	0.334945
161812_r_at	NA	-0.188348	8.73808	-1.9665	0.0764124	0.746981	99188_at	Use1	0.398489	9.02358	2.46377	0.0342305	0.334945
101514_at	Trappc3	0.196907	8.11047	1.96499	0.0766076	0.746981	93274_at	Clk1	0.440235	8.16743	2.46367	0.0342367	0.334945
94367_at	Uck2	0.235451	7.01609	1.96482	0.076629	0.746981	161351_r_at	NA	-0.165941	3.23695	-2.46342	0.0342508	0.334945
104260_at	Lpgat1	-0.314851	7.77347	-1.96446	0.0766749	0.746981	96919_at	Atp6v0c	0.241151	11.0386	2.46066	0.0344107	0.335643
161688_r_at	LOC101055763	-0.146917	10.0458	-1.96377	0.0767644	0.746981	95723_r_at	Ptms	-0.236395	12.1858	-2.45997	0.0344512	0.335643
98056_at	Phlda3	-0.250528	7.87767	-1.96369	0.0767745	0.746981	98767_at	Yy1	-0.411318	7.42964	-2.45969	0.0344675	0.335643
97935_at	Msl1	-0.202867	7.79275	-1.96346	0.0768042	0.746981	96971_f_at	NA	-0.244488	6.8493	-2.45925	0.0344928	0.335643
95530_at	Gtf2a1	-0.352383	7.33747	-1.96301	0.0768628	0.746981	100432_f_at	Mdfi	-0.138562	6.82752	-2.45905	0.0345046	0.335643
98122_at	Lmo4	-0.319864	8.74489	-1.96174	0.0770261	0.746981	99829_at	NA	-0.197082	5.99927	-2.45885	0.0345165	0.335643
162416_at	Cdca4	-0.243067	4.83781	-1.96116	0.0771017	0.746981	104537_at	Rmnd1	-0.255071	5.89354	-2.45828	0.0345494	0.335643
93128_at	Npy1r	-0.202421	5.10983	-1.96103	0.0771185	0.746981	97859_at	Inpp5a	0.244329	6.21459	2.45809	0.0345607	0.335643
93455_s_at	Bmp4	0.199578	9.31385	1.96069	0.0771622	0.746981	95571_at	Slc30a4	-0.192536	5.59971	-2.45803	0.0345641	0.335643
162159_i_at	Hnf1b	-0.150167	8.47667	-1.96051	0.0771866	0.746981	99123_s_at	Timm10b	-0.237908	7.71741	-2.45723	0.0346109	0.335836
160908_r_at	Ttc30b	-0.243694	7.43976	-1.9604	0.0772	0.746981	93455_s_at	Bmp4	-0.166603	7.17726	-2.45569	0.0347012	0.3362
99378_f_at	H2-Q4	0.307937	9.21217	1.95965	0.0772975	0.746981	161518_r_at	Angptl4	0.250777	3.62968	2.45528	0.0347249	0.3362
95721_at	Mapkapk2	0.15142	9.99868	1.95935	0.077337	0.746981	100560_at	Pafah1b1	0.158144	7.82598	2.45521	0.0347291	0.3362
161109_at	1810013L24Rik	-0.200629	4.55149	-1.95873	0.0774176	0.746981	97996_at	Papola	-0.203102	4.40815	-2.45422	0.0347872	0.336501
101462_r_at	Pja1	-0.136456	3.90068	-1.95872	0.0774184	0.746981	93255_at	Ralbp1	-0.23608	8.19995	-2.45126	0.0349614	0.337326
100056_at	Fbxw2	0.166056	8.01455	1.95836	0.0774648	0.746981	160279_at	Dnttip2	0.291556	7.01631	2.45081	0.0349881	0.337326
93915_at	Pou2af1	-0.184111	5.27516	-1.95823	0.0774825	0.746981	160898_at	Abt1	0.184828	7.37682	2.45068	0.034996	0.337326
92612_at	Slc27a5	0.176207	6.07472	1.95634	0.077728	0.746981	97834_g_at	Pfkp	0.25569	3.55177	2.45058	0.0350018	0.337326
161080_f_at	Gtf2ird2	-0.244048	5.07642	-1.95616	0.0777525	0.746981	102309_at	Zfp326	0.174497	6.11368	2.44981	0.0350471	0.337326
98463_at	Smarca4	0.2427	8.28588	1.95543	0.0778477	0.746981	102074_at	Otp	-0.168462	6.83046	-2.44976	0.0350505	0.337326
161975_r_at	Pgd	-0.139543	6.9426	-1.95529	0.0778653	0.746981	160135_at	Nit2	-0.379972	8.99334	-2.44957	0.0350616	0.337326
99190_at	Pstk	-0.129654	7.68176	-1.95481	0.0779282	0.746981	160858_at	Cmc2	-0.149118	7.53443	-2.44752	0.0351828	0.338232
161472_r_at	Lman2	-0.19599	6.48741	-1.95481	0.0779287	0.746981	94793_at	Sephs1	-0.180706	5.43317	-2.44688	0.0352213	0.338341
103672_at	Phf23	-0.137539	6.92746	-1.95454	0.0779641	0.746981	160113_at	Brap	0.227576	9.25401	2.44611	0.0352669	0.338359
97942_g_at	Capn6	-0.15297	5.27261	-1.95425	0.0780019	0.746981	96866_at	Avpi1	-0.194348	7.84526	-2.44554	0.035301	0.338359
102149_f_at	Ifna7	-0.160684	7.09358	-1.95406	0.0780268	0.746981	160063_i_at	Gsta1	-0.227434	5.00515	-2.44548	0.0353044	0.338359
101992_at	Psmb6	0.191731	9.82794	1.95371	0.0780728	0.746981	92963_at	Wdr81	-0.194834	9.01877	-2.44427	0.0353765	0.33845
92737_at	Irf4	-0.203109	6.7498	-1.95313	0.0781491	0.746981	101225_at	D5Ertd102e	-0.225377	7.54942	-2.44357	0.0354182	0.33845
160320_at	Sorbs1	-0.271081	8.25766	-1.9531	0.0781528	0.746981	160534_at	Psmc5	0.167006	8.12124	2.44345	0.0354259	0.33845
102981_at	Gabpa	0.184409	4.77851	1.9529	0.0781794	0.746981	100509_at	Rnf19a	0.319502	6.60574	2.44319	0.0354413	0.33845
100671_at	Ifna11	-0.171484	4.52044	-1.95091	0.0784407	0.748904	99531_at	Syngr4	-0.151197	8.03998	-2.44279	0.0354651	0.33845
94156_at	Nppc	-0.18675	6.10125	-1.95033	0.0785168	0.749059	161236_r_at	Snrnp27	-0.203526	3.22849	-2.4423	0.0354946	0.33845
93283_at	Aprt	0.176265	6.72849	1.94881	0.0787176	0.75022	98554_at	Ndrg3	-0.172214	4.53344	-2.44211	0.0355058	0.33845
160443_at	Prl3b1	-0.180836	4.12863	-1.94807	0.0788153	0.75022	100904_at	Mettl17	-0.15999	8.4902	-2.44169	0.0355308	0.33845
95480_at	NA	0.274056	8.61827	1.94804	0.0788187	0.75022	160661_at	Fam73b	-0.217032	7.3389	-2.44078	0.0355857	0.338712
93597_at	Snx5	-0.164739	5.92894	-1.94706	0.0789492	0.750398	98604_at	Rrp1	0.398272	7.00998	2.44033	0.0356125	0.338712
96343_at	Actn4	0.16453	9.22991	1.94638	0.0790393	0.750398	100115_at	Qrich1	0.305899	6.825	2.4394	0.0356685	0.338987
161794_i_at	Tmem191c	-0.158442	4.03518	-1.94619	0.0790647	0.750398	104190_at	Traf6	0.275234	5.92533	2.43623	0.03586	0.340548
104615_at	Galt	0.159497	5.68142	1.9452	0.0791955	0.750398	162102_r_at	Mcm5	-0.193761	8.81189	-2.43526	0.0359189	0.340777
160620_at	Gt(ROSA)26Sor	-0.21032	4.38658	-1.94518	0.0791988	0.750398	93196_at	Vps37a	-0.201495	4.01142	-2.43493	0.0359387	0.340777
94841_at	Psma5	0.199219	9.22083	1.94479	0.0792505	0.750398	103805_at	Nbn	0.298946	5.11026	2.43367	0.0360151	0.341241
102891_at	Wrn	-0.156404	6.81462	-1.94428	0.0793175	0.750398	162383_r_at	NA	-0.250354	8.69799	-2.4327	0.0360742	0.341403
160131_at	Amotl2	-0.192027	8.52235	-1.9437	0.0793956	0.750398	93860_i_at	Ctse	0.182992	7.97625	2.43249	0.0360868	0.341403
160950_at	Gapdhs	-0.173333	5.63772	-1.94307	0.0794785	0.750398	99176_at	Fibp	0.309759	6.74868	2.43125	0.0361624	0.341838
102154_f_at	Adck1	-0.18027	6.14752	-1.94282	0.0795128	0.750398	161022_at	Fam207a	-0.141965	6.06902	-2.43084	0.0361876	0.341838
103686_at	Mcoln2	0.167449	6.37199	1.94273	0.0795244	0.750398	92282_at	Rprd1b	0.346418	5.42343	2.43	0.0362393	0.342068
160093_r_at	NA	-0.137587	9.20742	-1.94212	0.0796057	0.750398	100133_at	Fyn	0.346759	6.13617	2.42929	0.0362828	0.34222
162214_r_at	Krt32	-0.195734	5.7363	-1.94007	0.0798797	0.750398	95111_i_at	Ppil2	-0.211521	3.30791	-2.42697	0.0364247	0.34301
102167_at	NA	-0.189591	7.13431	-1.94	0.0798887	0.750398	96322_at	NA	-0.254964	9.39568	-2.42675	0.0364383	0.34301
95502_at	Sirt2	0.148702	8.5387	1.93935	0.0799761	0.750398	98490_at	Arl8b	-0.235026	5.13833	-2.42658	0.0364489	0.34301
104671_at	Ampd3	-0.177358	6.41473	-1.93902	0.0800208	0.750398	96103_f_at	Rad23b	0.385604	8.77717	2.42474	0.036562	0.343815
103314_at	Parp8	-0.272883	5.52129	-1.93901	0.0800215	0.750398	101863_at	NA	-0.291127	4.65784	-2.42309	0.0366642	0.344517
96968_at	Gm13290	-0.137333	8.18933	-1.93882	0.0800474	0.750398	94085_at	Srgn	0.278965	5.42566	2.42242	0.0367055	0.344645
92228_at	Ctnna2	-0.187714	7.65868	-1.93875	0.0800571	0.750398	104759_at	Gpalpp1	0.257243	6.66513	2.42136	0.0367714	0.345005
160993_at	Iqgap2	-0.172601	6.27987	-1.93836	0.0801095	0.750398	96669_at	Ist1	0.236751	7.31009	2.42023	0.0368416	0.345404
98089_at	NA	-0.160784	6.15237	-1.9383	0.0801167	0.750398	96688_at	Dram2	0.289732	5.59438	2.41924	0.0369033	0.345442
103098_at	Baiap2	0.185228	8.80484	1.93767	0.0802021	0.750398	102263_at	Zfp143	0.225141	5.17028	2.41912	0.0369105	0.345442
95103_at	Fam192a	0.136784	8.13684	1.93754	0.0802195	0.750398	103903_at	Dnajc11	-0.181898	7.70913	-2.41882	0.0369291	0.345442
93469_at	Ephb3	-0.150549	6.49194	-1.93597	0.0804305	0.751809	161327_f_at	Rpl10a	0.339342	9.13221	2.41809	0.0369745	0.345442
95940_f_at	Fam105a	0.271394	4.87879	1.93518	0.0805373	0.751914	101555_at	Rac1	0.213387	10.641	2.41769	0.0369998	0.345442
92347_at	Kcnc3	-0.180901	6.68003	-1.93449	0.0806299	0.751914	161290_r_at	Brd7	-0.189593	3.07986	-2.41723	0.0370287	0.345442
101457_at	Jak2	0.197958	7.07365	1.93368	0.0807397	0.751914	99635_at	Ing4	-0.191253	8.47756	-2.41706	0.0370393	0.345442
102711_at	Rgs14	-0.158469	8.47581	-1.9333	0.080791	0.751914	104008_at	Spdef	-0.152848	6.54905	-2.41593	0.03711	0.345452
99462_at	Top2b	-0.411581	4.5883	-1.93323	0.0808008	0.751914	102402_at	Gbas	0.27416	7.48316	2.41516	0.0371578	0.345452
104600_at	Fip1l1	0.233797	5.05602	1.93316	0.0808094	0.751914	161243_f_at	Abhd8	-0.237931	7.44355	-2.41512	0.0371603	0.345452
103446_at	Ifih1	-0.251102	6.54703	-1.93277	0.0808632	0.751914	93822_at	Rpl37a	0.312211	10.7495	2.4151	0.0371616	0.345452
160259_at	Trim61	-0.169613	6.89492	-1.93196	0.080973	0.752374	95636_at	NA	-0.176385	7.50513	-2.41483	0.0371787	0.345452
162121_at	Krt10	0.165008	4.59034	1.93028	0.0812009	0.752764	99505_at	Rab4b	0.224279	7.48393	2.41351	0.0372613	0.345931
102829_s_at	Map2k6	0.307547	5.73799	1.93022	0.0812088	0.752764	160953_at	Cacna1h	-0.171659	6.90691	-2.41273	0.0373105	0.345931
98019_at	Tgfb1i1	-0.130101	9.54337	-1.92946	0.0813128	0.752764	162375_i_at	Krt81	-0.205759	3.44986	-2.41269	0.0373133	0.345931
160683_at	Slc25a36	-0.1983	9.12131	-1.92839	0.081458	0.752764	95642_at	Elovl1	-0.153361	7.31924	-2.41201	0.0373558	0.346068
104730_at	Mdn1	-0.143609	6.68166	-1.92766	0.0815575	0.752764	94892_r_at	Mea1	-0.167294	8.87586	-2.40941	0.0375201	0.347218
96373_at	NA	-0.170299	4.76532	-1.92714	0.0816291	0.752764	99364_at	Rbbp6	-0.196884	3.59956	-2.40917	0.0375355	0.347218
102324_at	Dnajc4	0.158412	7.27806	1.92708	0.0816374	0.752764	99639_at	Usp10	-0.203434	8.29175	-2.40872	0.037564	0.347224
100477_at	Tmem45a	0.171166	5.3238	1.92684	0.0816699	0.752764	161544_r_at	Csf2rb2	-0.231379	3.27548	-2.40616	0.0377262	0.348465
97073_at	NA	0.213383	3.8813	1.92678	0.0816773	0.752764	160308_at	Msn	0.273974	6.97836	2.40531	0.0377806	0.348709
104019_at	Ubl4	-0.209265	6.32076	-1.92673	0.0816841	0.752764	96719_i_at	Pvalb	-0.250241	11.014	-2.40422	0.03785	0.348871
97865_g_at	Fam32a	0.260681	8.08056	1.92636	0.0817354	0.752764	160156_at	Fam49b	0.425233	4.6389	2.40379	0.0378774	0.348871
92976_at	Ndp	-0.123242	6.49419	-1.92612	0.0817687	0.752764	102409_at	Lsm8	0.255486	6.80898	2.40372	0.0378819	0.348871
98932_at	NA	-0.151072	5.85697	-1.92537	0.0818712	0.752764	160570_at	Actn2	-0.15727	5.25421	-2.40286	0.0379372	0.349024
95712_at	Orc6	0.133606	6.82679	1.92431	0.0820166	0.752764	96501_at	F10	0.288751	8.22454	2.40259	0.0379544	0.349024
161205_at	Cox8b	-0.447624	5.42059	-1.92389	0.0820738	0.752764	92824_at	Nme6	0.184703	7.31189	2.4019	0.0379987	0.349117
161913_r_at	Fth1	-0.144362	11.9648	-1.92371	0.0820984	0.752764	97086_i_at	Psg-ps1	-0.182975	6.21457	-2.40117	0.0380455	0.349117
102290_at	Alox12	-0.149731	7.41431	-1.92358	0.0821167	0.752764	92481_at	Chek2	-0.236245	7.01444	-2.40112	0.0380484	0.349117
94946_at	Map3k3	-0.186553	7.36104	-1.92339	0.0821425	0.752764	93084_at	Slc25a4	0.345457	6.35875	2.3992	0.0381722	0.34961
100449_g_at	Acvrl1	-0.142088	6.80995	-1.92293	0.0822062	0.752764	93209_at	Nek4	-0.159408	5.45954	-2.39869	0.0382047	0.34961
161614_r_at	Tubb2a	-0.130019	8.52138	-1.92238	0.0822819	0.752764	98101_at	Gtf2a2	0.275573	7.27498	2.39858	0.038212	0.34961
160648_at	Fignl1	-0.20603	7.32261	-1.92062	0.0825246	0.752764	160788_at	Pes1	0.324155	5.44329	2.39813	0.0382406	0.34961
97504_at	Ccnd2	-0.218641	7.03566	-1.91979	0.0826392	0.752764	98901_at	Fcf1	0.400164	7.86363	2.39751	0.0382811	0.34961
104010_at	Zkscan14	0.174863	8.50291	1.91967	0.0826547	0.752764	96699_at	Hmgn1	0.245901	10.9361	2.39699	0.0383146	0.34961
93184_at	Tbl2	-0.181374	6.42389	-1.9192	0.0827204	0.752764	95505_at	Tor1b	0.246782	6.38608	2.39668	0.0383347	0.34961
101306_f_at	NA	-0.188425	5.84623	-1.9192	0.0827206	0.752764	93023_f_at	NA	-0.204155	7.24813	-2.39662	0.0383384	0.34961
97830_at	Pecam1	-0.18121	7.84549	-1.9191	0.0827344	0.752764	94985_at	Syncrip	-0.377628	4.74505	-2.39638	0.0383541	0.34961
104301_at	Mzt2	0.164194	8.33722	1.91859	0.0828039	0.752764	93142_at	Bach1	-0.236289	7.18826	-2.39351	0.0385398	0.350973
103657_i_at	Mtf2	-0.308348	5.4884	-1.91835	0.0828375	0.752764	93406_at	Mafg	0.192349	6.89806	2.3932	0.0385598	0.350973
94071_at	Gosr2	0.179976	8.35536	1.91751	0.0829546	0.752764	94835_f_at	Tubb2a	0.411724	10.6842	2.39232	0.0386174	0.351241
162460_f_at	Igbp1	-0.166214	6.39832	-1.91723	0.0829924	0.752764	161278_r_at	Oat	-0.260992	5.23828	-2.39112	0.0386951	0.351514
160694_at	Ifngr2	-0.12766	6.0848	-1.91702	0.0830216	0.752764	95536_at	Tceb3	-0.192183	7.41925	-2.39073	0.0387211	0.351514
94057_g_at	Scd1	-0.664113	9.98936	-1.91686	0.0830441	0.752764	161429_at	Amz2	-0.158433	8.45284	-2.39056	0.0387319	0.351514
95022_at	Akap12	0.265872	5.95512	1.9165	0.083095	0.752764	99101_at	Eif3d	0.306868	9.29399	2.38924	0.038818	0.351898
102957_at	Lcp2	-0.184733	4.54851	-1.91626	0.0831283	0.752764	92845_at	Oxct1	0.223103	4.80533	2.38905	0.0388305	0.351898
161132_at	Scel	-0.191322	4.361	-1.91606	0.0831551	0.752764	160864_at	Rtkn	-0.180393	6.94942	-2.38686	0.0389741	0.352484
101043_f_at	NA	-0.133491	6.67475	-1.91411	0.0834266	0.752764	97751_f_at	NA	-0.188054	9.41838	-2.38658	0.0389931	0.352484
92398_at	Vps37b	0.136917	8.09386	1.91402	0.0834395	0.752764	98391_at	Klk1b11	-0.201996	5.68441	-2.38641	0.0390041	0.352484
96054_f_at	Acp1	0.208743	7.39795	1.91386	0.0834626	0.752764	99373_at	Gjb4	-0.160315	6.75735	-2.38576	0.039047	0.352484
100694_at	NA	0.177004	13.0478	1.91308	0.0835701	0.752764	161837_r_at	C8g	-0.295	4.76831	-2.3855	0.0390638	0.352484
94327_at	Mrps18a	0.204068	8.96522	1.91178	0.0837526	0.752764	104680_at	Ramp1	0.204577	7.62009	2.38523	0.0390815	0.352484
104435_at	NA	-0.200067	8.86132	-1.9116	0.0837783	0.752764	102649_s_at	NA	0.51796	7.68825	2.38506	0.0390928	0.352484
97518_at	Fdft1	0.153508	8.48777	1.91133	0.0838148	0.752764	160090_f_at	Aldoa	0.281067	9.11696	2.38415	0.0391531	0.352773
99119_at	Cfl1	0.335922	10.917	1.91088	0.0838786	0.752764	161649_f_at	Art5	-0.174569	5.03114	-2.38306	0.0392245	0.353162
96518_at	Wwc1	0.218961	8.66219	1.91015	0.0839813	0.752764	102795_at	Mesp1	-0.173075	6.83748	-2.38233	0.0392731	0.353201
99007_at	Flot2	0.172531	8.73114	1.91002	0.0839987	0.752764	100091_at	Slc35b1	0.23404	9.77332	2.38184	0.0393058	0.353201
98982_at	Tmpo	-0.204809	8.2493	-1.90995	0.0840089	0.752764	101902_at	Rbpj	0.195197	5.40389	2.38172	0.0393137	0.353201
160796_at	Tiam2	-0.131668	6.22617	-1.90949	0.0840728	0.752764	93571_at	Sptbn1	0.254966	8.49493	2.38086	0.0393705	0.353457
101442_f_at	Itpr2	-0.191366	8.80128	-1.90928	0.0841032	0.752764	100732_at	NA	0.219336	10.4204	2.3797	0.0394478	0.353555
93326_at	Tspan7	0.261273	8.66825	1.90914	0.0841231	0.752764	92865_at	Dnase1	-0.153138	4.72513	-2.37946	0.0394638	0.353555
96598_at	Ccnj	-0.184525	4.95546	-1.90884	0.0841654	0.752764	94063_at	Sema4a	-0.250591	9.47657	-2.37942	0.0394663	0.353555
93081_at	Rbbp7	0.303473	9.4153	1.90853	0.0842078	0.752764	96556_at	Kalrn	-0.200724	5.17421	-2.37883	0.0395054	0.353651
101208_at	Slc7a1	-0.220625	5.86828	-1.9085	0.0842134	0.752764	100896_at	Cacng1	-0.176124	5.85397	-2.37817	0.0395494	0.353792
161517_at	Hsd11b2	-0.148222	4.97468	-1.90803	0.0842791	0.752764	160303_at	Acad9	-0.217072	7.78791	-2.37637	0.0396697	0.354614
101381_at	Rabep1	-0.156504	6.13258	-1.9079	0.0842972	0.752764	100996_at	Agpat6	0.255309	5.17167	2.37579	0.0397087	0.354708
101158_at	Zfp2	-0.173241	5.32366	-1.90725	0.0843882	0.752764	101967_at	Sdf2	-0.223622	8.53755	-2.37464	0.0397857	0.354994
160495_at	Ahr	-0.156213	4.72252	-1.90588	0.0845824	0.752764	96095_i_at	Hsdl2	0.22054	5.92255	2.37406	0.0398242	0.354994
161772_i_at	Gtf2ird2	-0.20841	8.78493	-1.90561	0.0846204	0.752764	99148_at	Fh1	0.327554	10.1105	2.37404	0.0398259	0.354994
162285_r_at	Slc44a4	-0.194188	3.97363	-1.90539	0.084651	0.752764	104254_at	Ralgps2	-0.140079	4.72976	-2.37298	0.0398972	0.355156
160575_at	Cggbp1	-0.421076	8.64275	-1.90535	0.0846572	0.752764	96799_at	Fbxw5	0.291858	7.30027	2.37251	0.0399284	0.355156
160421_r_at	Ctrb1	-0.176541	9.03801	-1.90512	0.0846897	0.752764	104144_at	Gtpbp2	0.226031	7.47471	2.37235	0.0399395	0.355156
100938_at	Ghrh	-0.177429	6.13328	-1.90467	0.0847536	0.752764	93980_at	Mak16	0.252558	4.11396	2.37207	0.0399579	0.355156
94381_at	Uck1	-0.145978	9.86956	-1.9035	0.0849179	0.752764	161157_r_at	Tgfbi	-0.363541	4.26535	-2.36994	0.040102	0.355726
93017_at	Sdcbp	0.15747	6.70959	1.90252	0.085058	0.752764	92222_f_at	H2-Q1	-0.237771	6.3661	-2.36924	0.0401491	0.355726
101589_at	NA	0.320791	6.99118	1.9022	0.0851031	0.752764	93410_at	Wnk2	-0.16825	6.66366	-2.36888	0.0401737	0.355726
161291_at	Dab1	-0.132215	4.07067	-1.90174	0.0851679	0.752764	160717_at	1110059E24Rik	0.329729	7.79541	2.36884	0.0401762	0.355726
96168_at	Kif23	0.208942	7.53147	1.90172	0.0851706	0.752764	95378_at	Inca1	0.235123	8.95127	2.36838	0.0402074	0.355726
102332_at	Ulk1	0.18086	8.29387	1.90079	0.0853036	0.752764	161796_r_at	Kcnq1	-0.265473	8.5408	-2.36815	0.0402228	0.355726
99503_at	NA	0.199837	9.48234	1.90069	0.0853172	0.752764	93147_f_at	Celf4	-0.181901	4.56349	-2.36773	0.0402516	0.355726
98822_at	Isg15	-0.187665	8.07573	-1.90039	0.0853603	0.752764	93861_f_at	Ctse	0.266397	7.69516	2.36755	0.0402639	0.355726
103539_at	Tec	-0.18911	8.00642	-1.89971	0.0854578	0.752764	101313_r_at	NA	-0.195017	4.16753	-2.36733	0.0402784	0.355726
104442_at	Rab14	-0.165224	7.66549	-1.89883	0.0855828	0.752764	160197_at	Pycrl	-0.221974	7.35756	-2.36569	0.0403902	0.356113
96499_at	AI594671	-0.139186	3.60614	-1.89883	0.0855831	0.752764	104604_at	Zscan12	0.270893	3.80253	2.36491	0.0404428	0.356113
160989_r_at	Npr3	-0.248248	4.45224	-1.89864	0.0856098	0.752764	96801_at	Ak1	-0.173545	6.78235	-2.3639	0.0405119	0.356113
104296_at	Hnrnpul2	-0.256431	6.53348	-1.89858	0.0856189	0.752764	161765_f_at	Rgs10	-0.16643	5.43111	-2.36366	0.0405283	0.356113
92774_at	NA	0.132779	4.97066	1.89856	0.0856222	0.752764	94982_f_at	NA	-0.333251	8.63881	-2.36351	0.0405384	0.356113
104348_at	Bre	0.240949	8.82317	1.89749	0.0857738	0.752764	101516_at	Cd59a	-0.336978	9.982	-2.36348	0.0405407	0.356113
161944_at	NA	-0.219036	5.72988	-1.89708	0.0858333	0.752764	101139_r_at	Prol1	-0.228964	5.09471	-2.36299	0.0405743	0.356113
98110_at	Mdm2	0.154962	8.07469	1.89693	0.085855	0.752764	92272_at	NA	-0.22076	5.70831	-2.3625	0.0406073	0.356113
95743_at	Paip2	-0.260699	8.16029	-1.8959	0.0860015	0.752764	160827_at	Rin2	-0.199184	7.07429	-2.36245	0.0406108	0.356113
102092_s_at	Ovgp1	0.224738	6.05577	1.89578	0.0860192	0.752764	101445_at	Dnmt1	-0.185306	8.11915	-2.36228	0.0406229	0.356113
92557_at	Hsd17b1	-0.149455	6.72211	-1.89567	0.0860353	0.752764	160380_at	Becn1	0.251362	7.95415	2.36209	0.0406359	0.356113
101215_at	Gabra2	-0.18304	5.17254	-1.89563	0.0860414	0.752764	93250_r_at	Hmgb2	0.202941	3.38123	2.36147	0.0406778	0.356231
94405_at	Slc6a6	0.154002	6.71348	1.8953	0.0860886	0.752764	161409_f_at	Dntt	-0.225568	7.86129	-2.35955	0.0408101	0.356953
161810_r_at	Osbpl9	-0.144064	7.31769	-1.89496	0.0861377	0.752764	103204_r_at	E2f8	-0.18102	5.5666	-2.35926	0.0408296	0.356953
103443_at	Aim1	0.128715	7.65689	1.89495	0.0861386	0.752764	97263_s_at	Csnk1d	0.368769	8.9703	2.35875	0.0408652	0.356953
103369_at	Klf13	0.182532	8.44757	1.89394	0.086284	0.753274	160876_at	Bcap29	0.182051	6.06535	2.35861	0.0408747	0.356953
101698_f_at	Krt2	-0.167589	7.95972	-1.8937	0.0863177	0.753274	103948_at	Tlx3	-0.227287	6.66582	-2.35624	0.0410381	0.357655
162079_at	Esyt1	-0.211351	6.4044	-1.8912	0.086679	0.755447	92384_at	Xpa	0.500064	6.27191	2.35562	0.0410811	0.357655
95715_at	Eif3k	0.176428	10.783	1.89114	0.0866877	0.755447	93933_at	Ppp1r3c	0.345747	7.48721	2.35527	0.0411052	0.357655
104177_at	Rsad2	-0.249818	7.52866	-1.89061	0.0867637	0.755583	94623_at	Enam	-0.245726	6.69957	-2.35474	0.0411421	0.357655
98154_at	Gtf3c2	0.258282	7.47824	1.88985	0.0868743	0.755858	160550_i_at	Magoh	0.443754	6.6436	2.35408	0.0411873	0.357655
99997_at	NA	-0.140891	7.54552	-1.88898	0.0869994	0.755858	160179_at	Tmem30a	0.264943	6.45562	2.35393	0.0411979	0.357655
96025_g_at	Ahcy	0.149455	10.8387	1.888	0.0871428	0.755858	99388_at	Src	-0.184533	7.63786	-2.35345	0.0412316	0.357655
100315_at	Atp8a1	-0.171205	6.48569	-1.88701	0.0872864	0.755858	103575_at	Nefl	0.156	3.50442	2.35326	0.0412447	0.357655
103254_at	Trafd1	0.149173	8.10738	1.88661	0.0873442	0.755858	95286_at	Clu	0.274193	11.3329	2.35305	0.041259	0.357655
102715_at	Nr2f1	-0.157453	4.21714	-1.8863	0.0873898	0.755858	160233_at	Ak3	-0.344682	8.99269	-2.35303	0.0412601	0.357655
103710_at	Zfp942	-0.275679	5.04836	-1.88523	0.0875445	0.755858	96940_at	Tead2	-0.136285	6.70165	-2.35289	0.0412701	0.357655
94040_at	NA	0.209116	9.75103	1.88523	0.0875452	0.755858	162384_f_at	Ccrn4l	0.337905	4.0309	2.35148	0.0413682	0.358257
101020_at	Ctsc	-0.219332	5.74325	-1.8837	0.0877677	0.755858	101381_at	Rabep1	-0.214252	5.24756	-2.35062	0.041428	0.358526
97712_at	Pikfyve	-0.189354	5.27212	-1.88368	0.0877708	0.755858	92931_at	Dll1	-0.164378	7.76574	-2.34964	0.041497	0.3588
160239_at	Psmd6	0.272424	9.50726	1.88344	0.0878063	0.755858	92275_at	Tfap2c	-0.129613	7.51193	-2.34935	0.0415172	0.3588
93427_at	Myo1d	0.1598	7.56185	1.8834	0.087813	0.755858	102685_at	Smr2	-0.24737	4.71968	-2.34812	0.0416031	0.359294
98632_at	Ada	-0.134047	9.42404	-1.88327	0.0878311	0.755858	95552_at	Dio1	-0.451027	8.48391	-2.34704	0.0416785	0.359697
103364_f_at	Tpgs2	-0.167647	8.59417	-1.88325	0.0878343	0.755858	98407_at	Efnb1	-0.179252	7.22914	-2.34425	0.0418748	0.360896
98123_at	Aadat	0.266263	10.334	1.88267	0.0879198	0.755858	162094_f_at	Wtap	0.179083	5.28235	2.34425	0.0418753	0.360896
94081_at	Rbm17	0.153989	8.59691	1.88199	0.0880193	0.755858	93730_at	NA	0.682716	10.8261	2.34376	0.0419092	0.360939
161110_at	Tktl1	-0.143748	6.46964	-1.88186	0.088038	0.755858	162083_f_at	NA	-0.177099	3.61949	-2.34313	0.0419541	0.361077
97268_i_at	Krtcap2	0.176721	10.1037	1.88181	0.0880457	0.755858	97731_at	Ido1	-0.180565	4.72495	-2.34248	0.0419998	0.361202
160471_at	Slbp	-0.222833	6.32162	-1.88172	0.088058	0.755858	92764_at	Ksr1	-0.166821	7.51271	-2.3421	0.0420265	0.361202
96733_at	Rap1gds1	-0.25901	8.71397	-1.88164	0.0880705	0.755858	160577_at	Atp9a	-0.160605	8.76804	-2.3409	0.0421121	0.361689
102938_at	Lect2	-0.15542	7.51092	-1.88115	0.0881421	0.755858	98042_at	Scpep1	0.216641	8.20474	2.33972	0.0421957	0.362158
102895_at	Nipbl	-0.192001	7.43855	-1.88078	0.088196	0.755858	161752_r_at	Cx3cl1	-0.166906	7.56853	-2.33777	0.0423341	0.363096
93682_at	Ldb2	-0.125193	9.4914	-1.88069	0.0882093	0.755858	98008_at	Cx3cl1	-0.142777	7.11921	-2.33695	0.042393	0.363352
94064_at	Zfp91	0.138092	6.98003	1.88015	0.0882882	0.755858	104438_at	Zfp30	-0.173586	6.59085	-2.33519	0.0425182	0.363934
160266_r_at	Brix1	0.193585	7.33265	1.87984	0.088334	0.755858	96951_at	Atp6v1d	0.271758	8.13296	2.33518	0.0425192	0.363934
100413_at	Ylpm1	-0.142443	7.46996	-1.87921	0.0884269	0.755858	96965_at	Cryge	-0.150253	7.93377	-2.33421	0.0425887	0.36402
94009_at	Tceb1	0.168691	6.77286	1.87919	0.0884296	0.755858	104097_at	Bub1	-0.178284	3.83757	-2.33401	0.0426027	0.36402
104071_at	Tnpo2	-0.235074	7.99639	-1.87818	0.0885782	0.756611	162287_r_at	Clca3	-0.299002	4.6369	-2.33382	0.0426167	0.36402
94289_r_at	Maged2	0.163944	7.3327	1.87686	0.0887731	0.757524	97268_i_at	Krtcap2	-0.159558	9.78091	-2.33267	0.0426994	0.364349
97819_at	Gsto1	0.224677	9.33515	1.87664	0.0888065	0.757524	161445_at	NA	-0.230521	4.27733	-2.33236	0.0427215	0.364349
94505_at	Peli1	0.205356	6.105	1.87604	0.0888938	0.757751	103398_at	Pxn	0.188928	7.67086	2.33206	0.0427428	0.364349
160225_at	Gtf2b	0.149844	8.77339	1.87495	0.0890554	0.758194	93946_at	Esr1	-0.139745	7.12162	-2.33136	0.0427931	0.364529
98104_at	Atp6v0b	0.297759	10.6468	1.87487	0.0890672	0.758194	161493_at	NA	-0.173407	5.27433	-2.33044	0.04286	0.364632
102758_at	Rbm6	-0.152195	5.87909	-1.87351	0.0892696	0.758329	160908_r_at	Ttc30b	-0.162502	6.48153	-2.33024	0.0428744	0.364632
102303_i_at	Zfp61	-0.140826	7.99509	-1.87309	0.0893318	0.758329	101172_at	Zfp92	-0.197168	6.8876	-2.32992	0.042897	0.364632
161282_r_at	NA	-0.207153	8.74986	-1.873	0.0893447	0.758329	99185_at	Mrpl41	0.247927	8.34558	2.32879	0.042979	0.364632
160682_at	NA	-0.155995	7.58507	-1.87274	0.0893835	0.758329	104183_at	Tubgcp4	-0.284151	6.25481	-2.32774	0.0430548	0.364632
95275_at	Il9r	-0.128081	5.94585	-1.87272	0.0893867	0.758329	160773_at	Zcchc7	0.179085	4.90172	2.32756	0.0430677	0.364632
102889_r_at	Limk1	-0.15677	10.9924	-1.87228	0.0894521	0.758369	95059_at	Pnrc2	-0.249741	9.3957	-2.32734	0.0430841	0.364632
93476_at	Prkdc	-0.132559	6.58791	-1.87108	0.0896306	0.759116	102790_at	Jtb	-0.252542	10.1793	-2.32682	0.0431216	0.364632
94364_at	Glg1	-0.207436	9.25621	-1.86955	0.0898597	0.759116	92525_i_at	Nacc2	-0.205148	7.96533	-2.32621	0.0431657	0.364632
95486_at	Jmjd6	0.146904	8.5682	1.86944	0.0898749	0.759116	97272_at	Hnrnpa1	0.226162	5.35284	2.32531	0.0432315	0.364632
104557_at	Pitpnb	0.346816	8.19869	1.86939	0.0898833	0.759116	98545_at	Phb2	0.316757	9.44355	2.325	0.0432536	0.364632
93776_at	Ngdn	0.163568	5.90278	1.86911	0.0899247	0.759116	99837_at	Galr1	-0.194213	6.58965	-2.32471	0.0432746	0.364632
98930_at	Cope	0.249687	8.83823	1.86908	0.0899291	0.759116	103768_at	Ccdc86	0.20522	7.28179	2.32446	0.0432931	0.364632
93173_at	Slc39a3	-0.126411	7.26332	-1.86877	0.0899752	0.759116	95707_at	Uqcc2	-0.242864	7.75905	-2.32423	0.0433096	0.364632
103349_at	NA	0.182417	5.69961	1.86843	0.0900265	0.759116	102086_r_at	D15Ertd50e	-0.170594	3.27798	-2.3237	0.0433487	0.364632
93852_at	Mef2a	0.144297	8.29311	1.86715	0.0902175	0.75996	161219_r_at	NA	-0.226661	6.72701	-2.32343	0.0433681	0.364632
95707_at	Uqcc2	0.315884	8.71628	1.86695	0.0902483	0.75996	93637_at	Cd5	-0.154592	6.14402	-2.32334	0.0433744	0.364632
161618_r_at	Sidt2	-0.126109	8.80362	-1.86538	0.0904833	0.761426	96718_at	NA	-0.186253	8.36031	-2.32302	0.0433982	0.364632
93719_at	Ackr4	-0.147578	7.10121	-1.86439	0.0906321	0.761449	94331_at	Stat6	0.233596	7.13956	2.32243	0.0434413	0.364632
161561_r_at	Med22	-0.166392	10.9368	-1.86434	0.0906396	0.761449	93493_at	Ddx5	0.786593	6.4955	2.32207	0.0434675	0.364632
161714_f_at	Maoa	-0.148633	3.4344	-1.86381	0.0907195	0.761449	160914_at	Wfdc12	-0.187422	6.50058	-2.32161	0.0435008	0.364632
103255_at	Traf5	-0.156943	8.4901	-1.86354	0.0907609	0.761449	95643_at	NA	0.138019	6.94248	2.32141	0.0435162	0.364632
101679_at	Opn1mw	-0.147001	6.98245	-1.86334	0.090791	0.761449	160706_at	Slc22a23	-0.326701	5.37703	-2.3212	0.0435309	0.364632
92265_f_at	Trove2	-0.184574	6.7954	-1.86227	0.0909524	0.762252	98010_at	Nfe2	-0.207625	5.93938	-2.32112	0.043537	0.364632
[truncated: 10,998 more rows]
