# Supplementary material for: Effects of Space Flight on Mouse Liver versus Kidney: Gene Pathway Analyses
Source: Int J Mol Sci. 2018 Dec 18;19(12):4106. doi: 10.3390/ijms19124106 (PMC6321533; doi:10.3390/ijms19124106)
Supplement: Supplementary file 1 [file ijms-19-04106-s001.zip › Suppl Table S2 GSEA all data.xlsx]

## Sheet: Sheet1 (2)
Gene Set	Kidney GSEA pathway No.	Liver GSEA pathway No.	Kidney SIZE (number of genes in pool)	Liver SIZE (number of genes in pool)	Kidney Enrichment score	Liver Enrichment score	Kidney Normalized Enrichment score	Liver Normalized Enrichment score	Kidney Family Wise Error Rate p-val	Liver Family Wise Error Rate p-val	Kidney normalized p-val	Liver normalized p-val	Kidney False Discovery Rate q-val	Liver False Discovery Rate q-val	Kidney RANK AT MAX	Liver RANK AT MAX
ACID_AMINO_ACID_LIGASE_ACTIVITY	7	1	31	31	0.46	0.39	1.54	1.38	0.998	1	0.014	0.041	0.858	0.88	1803	2272
ACTIN_BINDING	685	2	41	41	0.21	0.2	0.74	0.76	1	1	0.915	0.889	1	1	2636	6973
ACTIN_CYTOSKELETON	587	3	77	77	0.23	0.2	0.85	0.83	1	1	0.837	0.856	1	1	5331	6343
ACTIN_CYTOSKELETON_ORGANIZATION_AND_BIOGENESIS	749	4	58	58	0.17	0.31	0.63	1.24	1	1	0.989	0.096	1	0.717	5834	2617
ACTIN_FILAMENT_BASED_PROCESS	715	5	65	65	0.19	0.31	0.69	1.26	1	1	0.978	0.071	1	0.818	5969	2617
ACTIVATION_OF_MAPK_ACTIVITY	397	6	25	25	0.3	0.26	0.98	0.91	1	1	0.516	0.62	1	0.98	5175	3759
ACTIVE_TRANSMEMBRANE_TRANSPORTER_ACTIVITY	333	7	71	71	0.28	0.33	1.04	1.32	1	1	0.4	0.027	0.953	0.808	4585	4341
ADAPTIVE_IMMUNE_RESPONSE	506	8	18	18	0.29	0.37	0.9	1.2	1	1	0.635	0.2	1	0.763	3743	4966
ADAPTIVE_IMMUNE_RESPONSE_GO_0002460	411	9	17	17	0.32	0.36	0.97	1.16	1	1	0.534	0.249	1	0.754	3283	4966
ADENYL_NUCLEOTIDE_BINDING	138	10	92	92	0.32	0.21	1.2	0.88	1	1	0.085	0.778	0.791	0.991	3075	5819
ADENYL_RIBONUCLEOTIDE_BINDING	115	11	91	91	0.32	0.22	1.24	0.91	1	1	0.06	0.718	0.741	0.983	3075	5819
ADHERENS_JUNCTION	681	12	15	15	0.25	0.39	0.74	1.22	1	1	0.836	0.2	1	0.732	2986	3581
ALCOHOL_METABOLIC_PROCESS	320	13	61	61	0.28	0.23	1.04	0.9	1	1	0.384	0.7	0.957	0.987	4606	4732
AMINE_CATABOLIC_PROCESS	740	14	21	21	0.21	0.14	0.66	0.49	1	1	0.933	0.997	1	1	3122	3875
AMINE_METABOLIC_PROCESS	700	15	92	92	0.19	0.25	0.72	1.02	1	1	0.974	0.428	1	0.93	3910	3959
AMINE_RECEPTOR_ACTIVITY	650	16	23	23	0.24	-0.21	0.79	-1.01	1	0.983	0.8	0.55	1	0.964	2860	7304
AMINE_TRANSMEMBRANE_TRANSPORTER_ACTIVITY	426	17	22	22	0.3	0.29	0.95	1	1	1	0.549	0.484	1	0.94	3851	4335
AMINE_TRANSPORT	730	18	23	23	0.21	0.35	0.68	1.21	1	1	0.921	0.195	1	0.748	3660	4284
AMINO_ACID_AND_DERIVATIVE_METABOLIC_PROCESS	409	19	71	71	0.26	0.26	0.97	1.05	1	1	0.569	0.371	1	0.9	3910	3959
AMINO_ACID_CATABOLIC_PROCESS	725	20	19	19	0.22	-0.17	0.68	-0.79	1	1	0.917	0.964	1	0.836	3122	6652
AMINO_ACID_DERIVATIVE_METABOLIC_PROCESS	594	21	17	17	0.27	0.3	0.84	0.94	1	1	0.731	0.569	1	0.971	2288	4523
AMINO_ACID_METABOLIC_PROCESS	395	22	56	56	0.27	0.24	0.98	0.95	1	1	0.537	0.597	1	0.959	3910	3959
AMINO_ACID_TRANSMEMBRANE_TRANSPORTER_ACTIVITY	433	23	15	15	0.32	0.29	0.95	0.9	1	1	0.548	0.616	1	0.991	3851	4284
AMINO_ACID_TRANSPORT	710	24	15	15	0.23	0.34	0.7	1.08	1	1	0.889	0.365	1	0.875	5035	4284
ANATOMICAL_STRUCTURE_FORMATION	377	25	40	40	0.29	0.32	1	1.21	1	1	0.494	0.155	1	0.747	3459	4172
ANATOMICAL_STRUCTURE_MORPHOGENESIS	468	26	241	241	0.23	0.24	0.92	1.06	1	1	0.783	0.291	1	0.9	5468	4320
ANGIOGENESIS	627	27	35	35	0.23	0.33	0.81	1.24	1	1	0.829	0.118	1	0.742	3760	2157
ANION_TRANSMEMBRANE_TRANSPORTER_ACTIVITY	365	28	31	31	0.3	0.19	1	0.67	1	1	0.495	0.944	1	1	4438	3281
ANION_TRANSPORT	545	29	16	16	0.29	0.21	0.88	0.66	1	1	0.661	0.929	1	1	5893	3327
ANTI_APOPTOSIS	108	30	90	90	0.33	0.24	1.25	0.98	1	1	0.052	0.524	0.707	0.935	3509	3512
APICAL_JUNCTION_COMPLEX	67	31	16	16	0.44	0.4	1.33	1.28	1	1	0.093	0.15	0.621	0.796	3297	3630
APICOLATERAL_PLASMA_MEMBRANE	71	32	16	16	0.44	0.4	1.32	1.28	1	1	0.11	0.126	0.627	0.815	3297	3630
APOPTOSIS_GO	263	33	305	305	0.27	0.25	1.09	1.12	1	1	0.169	0.109	0.886	0.823	4407	4496
APOPTOTIC_PROGRAM	231	34	43	43	0.31	0.32	1.12	1.21	1	1	0.269	0.16	0.852	0.746	2491	4241
AROMATIC_COMPOUND_METABOLIC_PROCESS	775	35	17	17	0.17	0.29	0.52	0.93	1	1	0.994	0.575	0.995	0.982	3073	4664
ATP_BINDING	104	36	87	87	0.33	0.22	1.26	0.9	1	1	0.054	0.735	0.706	0.985	3075	5819
ATPASE_ACTIVITY	459	37	69	69	0.25	0.35	0.94	1.39	1	1	0.651	0.013	1	0.878	4929	3452
ATPASE_ACTIVITY_COUPLED	307	38	57	57	0.29	0.35	1.06	1.38	1	1	0.359	0.027	0.923	0.87	4929	3452
ATPASE_ACTIVITY_COUPLED_TO_MOVEMENT_OF_SUBSTANCES	242	39	30	30	0.33	0.42	1.11	1.51	1	1	0.311	0.015	0.861	1	4929	3406
ATPASE_ACTIVITY_COUPLED_TO_TRANSMEMBRANE_MOVEMENT_OF_IONS	166	40	17	17	0.38	0.41	1.17	1.33	1	1	0.238	0.102	0.817	0.851	4571	4236
AUXILIARY_TRANSPORT_PROTEIN_ACTIVITY	691	41	17	17	0.24	0.23	0.73	0.73	1	1	0.859	0.858	1	1	5180	5317
AXONOGENESIS	466	42	24	24	0.29	0.35	0.93	1.22	1	1	0.604	0.179	1	0.732	3937	3326
BASEMENT_MEMBRANE	776	43	24	24	0.15	0.28	0.5	0.95	1	1	0.992	0.555	0.997	0.957	7401	4999
BASOLATERAL_PLASMA_MEMBRANE	680	44	21	21	0.24	0.4	0.75	1.34	1	1	0.87	0.088	1	0.893	6464	4188
BEHAVIOR	677	45	102	102	0.19	0.21	0.75	0.86	1	1	0.962	0.801	1	0.993	2834	3670
BIOPOLYMER_CATABOLIC_PROCESS	297	46	74	74	0.28	0.3	1.06	1.2	1	1	0.335	0.116	0.914	0.769	3730	4887
BIOPOLYMER_MODIFICATION	288	47	369	369	0.26	0.21	1.07	0.94	1	1	0.2	0.753	0.895	0.972	4604	3976
BIOSYNTHETIC_PROCESS	241	48	276	276	0.27	0.22	1.11	1	1	1	0.129	0.493	0.86	0.944	4014	3959
BLOOD_COAGULATION	617	49	35	35	0.24	-0.19	0.82	-1.1	1	0.94	0.81	0.4	1	0.833	6444	6951
BONE_REMODELING	764	50	18	18	0.19	0.2	0.59	0.64	1	1	0.969	0.948	0.998	1	6743	6957
BRAIN_DEVELOPMENT	717	51	29	29	0.2	0.2	0.69	0.71	1	1	0.921	0.902	1	1	4936	6436
CALCIUM_CHANNEL_ACTIVITY		7	20	20	-0.27	0.22	-1.36	0.73	0.341	1	0.111	0.857	0.141	1	5840	2858
CALCIUM_ION_BINDING	600	52	61	61	0.23	0.3	0.83	1.18	1	1	0.831	0.158	1	0.752	4696	4158
CALCIUM_ION_TRANSPORT	766	53	17	17	0.19	0.35	0.59	1.14	1	1	0.971	0.305	0.998	0.78	7348	3788
CAMP_MEDIATED_SIGNALING	521	54	44	44	0.26	0.21	0.89	0.81	1	1	0.722	0.84	1	0.997	4035	6579
CARBOHYDRATE_BINDING	721	55	39	39	0.19	0.25	0.69	0.92	1	1	0.937	0.643	1	0.98	6358	4414
CARBOHYDRATE_BIOSYNTHETIC_PROCESS	520	56	21	21	0.28	0.39	0.89	1.32	1	1	0.648	0.098	1	0.777	5695	2580
CARBOHYDRATE_CATABOLIC_PROCESS	713	57	16	16	0.23	0.26	0.7	0.82	1	1	0.889	0.735	1	0.999	3667	6241
CARBOHYDRATE_METABOLIC_PROCESS	661	58	104	104	0.2	0.2	0.78	0.82	1	1	0.95	0.899	1	1	5727	6598
CARBON_CARBON_LYASE_ACTIVITY	327	59	15	15	0.35	0.32	1.04	1.02	1	1	0.42	0.459	0.952	0.932	893	1835
CARBON_OXYGEN_LYASE_ACTIVITY	670	60	16	16	0.25	0.48	0.76	1.49	1	1	0.83	0.04	1	0.768	3495	3751
CARBOXYLESTERASE_ACTIVITY	712	61	17	17	0.23	0.18	0.7	0.57	1	1	0.894	0.97	1	1	6029	5195
CARBOXYLIC_ACID_METABOLIC_PROCESS	460	62	111	111	0.24	0.26	0.94	1.1	1	1	0.658	0.24	1	0.855	4034	4498
CARBOXYLIC_ACID_TRANSMEMBRANE_TRANSPORTER_ACTIVITY	759	63	25	25	0.19	0.34	0.62	1.18	1	1	0.954	0.218	0.997	0.743	3942	4335
CARBOXYLIC_ACID_TRANSPORT	708	64	23	23	0.22	0.36	0.7	1.24	1	1	0.908	0.149	1	0.728	5839	4284
CASPASE_ACTIVATION	30	65	16	16	0.46	0.32	1.4	1.03	1	1	0.055	0.417	0.768	0.925	2491	4145
CATABOLIC_PROCESS	385	66	139	139	0.25	0.24	0.98	1.03	1	1	0.55	0.372	1	0.933	3798	4887
CATION_BINDING	511	67	135	135	0.23	0.24	0.9	1.03	1	1	0.777	0.41	1	0.934	4696	4220
CATION_CHANNEL_ACTIVITY	635	68	62	62	0.22	0.2	0.8	0.81	1	1	0.867	0.855	1	0.996	5565	3913
CATION_HOMEOSTASIS	684	69	73	73	0.2	0.18	0.74	0.73	1	1	0.947	0.949	1	1	6465	6348
CATION_TRANSMEMBRANE_TRANSPORTER_ACTIVITY	585	70	116	116	0.22	0.2	0.85	0.83	1	1	0.872	0.891	1	1	4585	4408
CATION_TRANSPORT	497	71	83	83	0.24	0.27	0.91	1.12	1	1	0.712	0.22	1	0.819	3833	4121
CELL_ACTIVATION	648	72	47	47	0.22	0.21	0.79	0.79	1	1	0.873	0.841	1	1	6231	6695
CELL_CELL_ADHESION	697	73	55	55	0.2	0.24	0.72	0.93	1	1	0.953	0.637	1	0.985	4696	6481
CELL_CELL_SIGNALING	703	74	263	263	0.17	0.2	0.71	0.88	1	1	0.998	0.869	1	0.987	6810	5675
CELL_CORTEX	343	75	19	19	0.33	0.38	1.03	1.25	1	1	0.43	0.16	0.973	0.77	2189	2631
CELL_CYCLE_ARREST_GO_0007050	551	76	42	42	0.25	0.38	0.88	1.43	1	1	0.739	0.024	1	0.827	6193	4013
CELL_CYCLE_CHECKPOINT_GO_0000075	376	77	33	33	0.29	0.4	1	1.47	1	1	0.513	0.018	1	0.86	3379	2969
CELL_CYCLE_GO_0007049	361	78	207	207	0.25	0.27	1.01	1.18	1	1	0.455	0.051	0.999	0.743	4902	4084
CELL_CYCLE_PHASE	560	79	112	112	0.22	0.23	0.87	0.98	1	1	0.839	0.53	1	0.934	5271	4081
CELL_CYCLE_PROCESS	558	80	129	129	0.22	0.22	0.87	0.92	1	1	0.832	0.717	1	0.98	5271	4081
CELL_DEVELOPMENT	244	81	394	394	0.26	0.23	1.1	1.02	1	1	0.096	0.407	0.872	0.933	4407	4496
CELL_DIVISION	765	82	18	18	0.19	-0.33	0.59	-1.3	1	0.548	0.968	0.158	0.998	0.326	4143	6233
CELL_FRACTION	367	83	304	304	0.24	0.21	1	0.92	1	1	0.487	0.788	1	0.981	4930	5574
CELL_JUNCTION	647	84	41	41	0.23	0.33	0.79	1.23	1	1	0.855	0.122	1	0.703	6872	3096
CELL_MATRIX_ADHESION	502	85	25	25	0.27	0.23	0.91	0.81	1	1	0.654	0.779	1	0.996	4300	1226
CELL_MIGRATION	581	86	59	59	0.23	0.21	0.85	0.82	1	1	0.804	0.826	1	0.998	3760	5427
CELL_PROJECTION	480	87	61	61	0.25	0.21	0.92	0.85	1	1	0.673	0.802	1	0.997	5839	3637
CELL_PROLIFERATION_GO_0008283	392	88	360	360	0.24	0.22	0.98	1.01	1	1	0.58	0.444	1	0.938	4842	4478
CELL_SUBSTRATE_ADHESION	446	89	26	26	0.28	0.24	0.94	0.84	1	1	0.592	0.745	1	1	4300	5139
CELL_SURFACE	736	90	43	43	0.19	0.26	0.67	0.97	1	1	0.955	0.53	1	0.943	6894	4218
CELL_SURFACE_RECEPTOR_LINKED_SIGNAL_TRANSDUCTION_GO_0007166	424	91	404	404	0.23	0.2	0.96	0.93	1	1	0.695	0.799	1	0.984	4972	4318
CELLULAR_BIOSYNTHETIC_PROCESS	224	92	194	194	0.28	0.25	1.12	1.08	1	1	0.116	0.229	0.842	0.874	4014	3848
CELLULAR_CARBOHYDRATE_CATABOLIC_PROCESS	716	93	16	16	0.23	0.26	0.69	0.82	1	1	0.886	0.75	1	1	3667	6241
CELLULAR_CARBOHYDRATE_METABOLIC_PROCESS	762	94	70	70	0.16	0.25	0.6	1	1	1	0.995	0.484	1	0.938	5727	4709
CELLULAR_CATABOLIC_PROCESS	407	95	133	133	0.25	0.25	0.97	1.06	1	1	0.583	0.311	1	0.894	3798	4887
CELLULAR_CATION_HOMEOSTASIS	688	96	72	72	0.2	0.18	0.73	0.74	1	1	0.95	0.951	1	1	6465	6348
CELLULAR_COMPONENT_ASSEMBLY	193	97	172	172	0.29	0.25	1.15	1.09	1	1	0.114	0.22	0.843	0.87	4306	4526
CELLULAR_COMPONENT_DISASSEMBLY	293	98	19	19	0.34	0.39	1.06	1.29	1	1	0.369	0.12	0.917	0.835	580	4241
CELLULAR_DEFENSE_RESPONSE	554	99	33	33	0.26	0.21	0.87	0.78	1	1	0.723	0.842	1	1	4025	3038
CELLULAR_HOMEOSTASIS	726	100	88	88	0.18	0.19	0.68	0.78	1	1	0.986	0.937	1	1	6465	3364
CELLULAR_LIPID_CATABOLIC_PROCESS	415	101	15	15	0.32	0.35	0.96	1.11	1	1	0.539	0.339	1	0.833	3036	2783
CELLULAR_LIPID_METABOLIC_PROCESS	351	102	142	142	0.26	0.22	1.02	0.95	1	1	0.451	0.652	0.987	0.957	3895	4732
CELLULAR_LOCALIZATION	438	103	210	210	0.23	0.23	0.95	1.03	1	1	0.666	0.406	1	0.926	3809	3979
CELLULAR_MACROMOLECULE_CATABOLIC_PROCESS	189	104	65	65	0.31	0.29	1.15	1.16	1	1	0.197	0.186	0.851	0.761	3667	5331
CELLULAR_MORPHOGENESIS_DURING_DIFFERENTIATION	492	105	27	27	0.28	0.32	0.91	1.11	1	1	0.628	0.289	1	0.824	3937	3326
CELLULAR_PROTEIN_CATABOLIC_PROCESS	284	106	36	36	0.31	0.35	1.07	1.31	1	1	0.346	0.097	0.899	0.787	2699	5331
CELLULAR_PROTEIN_COMPLEX_ASSEMBLY	43	107	18	18	0.45	0.32	1.37	1.02	1	1	0.07	0.439	0.674	0.933	3365	5843
CELLULAR_RESPIRATION	106	108	16	16	0.41	0.23	1.25	0.73	1	1	0.168	0.851	0.709	1	4006	2834
CENTRAL_NERVOUS_SYSTEM_DEVELOPMENT	741	109	77	77	0.17	0.17	0.66	0.7	1	1	0.987	0.967	1	1	5545	5819
CENTROSOME	770	110	28	28	0.16	0.24	0.55	0.84	1	1	0.984	0.742	0.999	1	2660	6381
CHANNEL_REGULATOR_ACTIVITY	746	111	15	15	0.22	0.22	0.65	0.68	1	1	0.923	0.903	1	0.999	3738	5317
CHEMICAL_HOMEOSTASIS	671	112	103	103	0.2	0.19	0.76	0.78	1	1	0.959	0.939	1	1	6484	5721
CHEMOKINE_ACTIVITY	686	113	24	24	0.22	0.24	0.73	0.81	1	1	0.888	0.787	1	0.999	6370	6273
CHEMOKINE_RECEPTOR_BINDING	651	114	25	25	0.24	0.25	0.79	0.89	1	1	0.824	0.66	1	0.989	2334	3670
CHROMATIN	268	115	24	24	0.33	0.22	1.09	0.75	1	1	0.333	0.85	0.888	1	4884	4842
CHROMATIN_ASSEMBLY_OR_DISASSEMBLY	188	116	16	16	0.38	0.24	1.15	0.77	1	1	0.269	0.809	0.852	1	2891	2306
CHROMATIN_BINDING	88	117	21	21	0.41	0.29	1.28	0.98	1	1	0.129	0.508	0.671	0.936	4124	3603
CHROMATIN_MODIFICATION	180	118	27	27	0.35	0.35	1.15	1.23	1	1	0.235	0.16	0.864	0.705	5094	2415
CHROMOSOMAL_PART	559	119	65	65	0.23	0.25	0.87	1	1	1	0.771	0.482	1	0.94	5043	5535
CHROMOSOME	479	120	76	76	0.25	0.26	0.92	1.06	1	1	0.694	0.35	1	0.901	3662	5535
CHROMOSOME_ORGANIZATION_AND_BIOGENESIS	252	121	67	67	0.3	0.23	1.1	0.91	1	1	0.285	0.682	0.881	0.982	5094	2936
CHROMOSOME_SEGREGATION	368	122	18	18	0.32	0.21	1	0.7	1	1	0.483	0.902	1	0.999	4103	1836
CHROMOSOMEPERICENTRIC_REGION	739	123	20	20	0.21	0.37	0.66	1.24	1	1	0.933	0.174	1	0.718	2693	3404
CLATHRIN_COATED_VESICLE	282	124	23	23	0.33	0.26	1.08	0.87	1	1	0.366	0.681	0.895	0.992	3666	1068
COAGULATION	615	125	35	35	0.24	-0.19	0.82	-0.98	1	0.991	0.79	0.75	1	0.684	6444	6951
COATED_VESICLE	543	126	30	30	0.26	0.25	0.88	0.91	1	1	0.701	0.657	1	0.983	3666	5598
COENZYME_METABOLIC_PROCESS	105	127	24	24	0.39	0.32	1.26	1.08	1	1	0.124	0.348	0.701	0.877	2346	4664
COFACTOR_METABOLIC_PROCESS	227	128	36	36	0.33	0.26	1.12	0.95	1	1	0.268	0.557	0.848	0.959	2623	4664
COLLAGEN	773	129	20	20	0.17	0.21	0.54	0.72	1	1	0.988	0.865	0.996	1	6801	4361
CONTRACTILE_FIBER	763	130	17	17	0.19	0.31	0.6	0.99	1	1	0.951	0.482	0.999	0.941	5563	3598
CONTRACTILE_FIBER_PART	709	131	16	16	0.23	0.32	0.7	1.03	1	1	0.881	0.43	1	0.93	3125	3598
CYCLIC_NUCLEOTIDE_MEDIATED_SIGNALING	613	132	75	75	0.22	0.18	0.82	0.74	1	1	0.879	0.939	1	1	6123	6439
CYSTEINE_TYPE_ENDOPEPTIDASE_ACTIVITY	120	133	26	26	0.37	0.32	1.23	1.13	1	1	0.156	0.28	0.742	0.785	4519	4108
CYSTEINE_TYPE_PEPTIDASE_ACTIVITY	148	134	34	34	0.35	0.28	1.19	1.03	1	1	0.183	0.422	0.821	0.928	4519	4108
CYTOKINE_ACTIVITY	463	135	61	61	0.25	0.26	0.93	1.01	1	1	0.64	0.476	1	0.939	3721	4430
CYTOKINE_BINDING	391	136	39	39	0.28	0.3	0.98	1.12	1	1	0.524	0.275	1	0.821	3472	3741
CYTOKINE_BIOSYNTHETIC_PROCESS	342	137	26	26	0.31	0.27	1.03	0.97	1	1	0.456	0.521	0.973	0.942	4257	3848
CYTOKINE_METABOLIC_PROCESS	329	138	26	26	0.31	0.27	1.04	0.95	1	1	0.414	0.554	0.95	0.958	4257	3848
CYTOKINE_PRODUCTION	363	139	45	45	0.28	0.18	1.01	0.7	1	1	0.482	0.946	1	1	4257	4262
CYTOKINESIS	760	140	16	16	0.2	-0.34	0.6	-1.46	1	0.229	0.964	0.02	1	0.159	448	6088
CYTOPLASMIC_MEMBRANE_BOUND_VESICLE	576	141	64	64	0.23	0.27	0.85	1.08	1	1	0.791	0.306	1	0.872	4820	5213
CYTOPLASMIC_VESICLE	592	142	66	66	0.23	0.26	0.84	1.03	1	1	0.86	0.41	1	0.929	4820	5598
CYTOPLASMIC_VESICLE_MEMBRANE	719	143	20	20	0.22	0.29	0.69	0.98	1	1	0.903	0.498	1	0.933	4820	5213
CYTOPLASMIC_VESICLE_PART	722	144	20	20	0.22	0.29	0.68	0.98	1	1	0.91	0.514	1	0.942	4820	5213
CYTOSKELETAL_PART	553	145	126	126	0.22	0.22	0.87	0.93	1	1	0.823	0.672	1	0.981	3534	6381
CYTOSKELETAL_PROTEIN_BINDING	577	146	90	90	0.22	0.29	0.85	1.17	1	1	0.843	0.131	1	0.753	5298	3583
CYTOSKELETON	429	147	202	202	0.24	0.21	0.95	0.92	1	1	0.644	0.737	1	0.981	3682	6381
CYTOSKELETON_DEPENDENT_INTRACELLULAR_TRANSPORT	742	148	16	16	0.22	0.33	0.66	1.07	1	1	0.92	0.38	1	0.895	6547	6030
CYTOSKELETON_ORGANIZATION_AND_BIOGENESIS	756	149	115	115	0.16	0.25	0.63	1.05	1	1	0.997	0.368	1	0.908	6689	3096
CYTOSOL	527	150	112	112	0.23	0.29	0.89	1.24	1	1	0.761	0.044	1	0.726	6279	2915
DEFENSE_RESPONSE	393	151	158	158	0.25	0.2	0.98	0.88	1	1	0.571	0.82	1	0.989	4257	3696
DEOXYRIBONUCLEASE_ACTIVITY	590	152	18	18	0.27	0.39	0.84	1.27	1	1	0.739	0.135	1	0.787	580	4672
DEPHOSPHORYLATION	112	153	42	42	0.35	0.23	1.24	0.88	1	1	0.119	0.716	0.744	0.986	1929	6371
DETECTION_OF_STIMULUS	656	154	16	16	0.26	0.28	0.78	0.89	1	1	0.799	0.64	1	0.988	5765	6008
DEVELOPMENT_OF_PRIMARY_SEXUAL_CHARACTERISTICS	636	155	20	20	0.26	0.28	0.8	0.91	1	1	0.776	0.633	1	0.979	6385	5819
DI___TRI_VALENT_INORGANIC_CATION_TRANSPORT	653	156	21	21	0.24	0.38	0.79	1.28	1	1	0.788	0.135	1	0.821	5265	3788
DIGESTION	767	157	27	27	0.18	0.13	0.58	0.46	1	1	0.984	0.996	0.997	1	5589	3273
DNA_BINDING	246	158	376	376	0.26	0.27	1.1	1.22	1	1	0.123	0.006	0.884	0.738	3749	4931
DNA_CATABOLIC_PROCESS	737	159	18	18	0.22	0.3	0.67	0.96	1	1	0.898	0.519	1	0.951	4863	4532
DNA_DAMAGE_RESPONSESIGNAL_TRANSDUCTION	229	160	19	19	0.36	0.33	1.12	1.1	1	1	0.305	0.328	0.846	0.836	2766	4241
DNA_DEPENDENT_DNA_REPLICATION	687	161	37	37	0.21	0.31	0.73	1.16	1	1	0.906	0.228	1	0.76	4842	5454
DNA_DIRECTED_RNA_POLYMERASEII_HOLOENZYME	11	162	33	33	0.45	0.34	1.52	1.24	0.998	1	0.009	0.14	0.684	0.737	4000	4248
DNA_METABOLIC_PROCESS	190	163	162	162	0.29	0.26	1.15	1.14	1	1	0.103	0.125	0.85	0.772	4863	5531
DNA_PACKAGING	401	164	23	23	0.3	-0.21	0.97	-0.98	1	0.991	0.532	0.577	1	0.782	5378	7345
DNA_RECOMBINATION	524	165	32	32	0.26	0.22	0.89	0.78	1	1	0.691	0.835	1	1	2834	5084
DNA_REPAIR	177	166	78	78	0.31	0.29	1.15	1.19	1	1	0.16	0.136	0.861	0.757	4488	3501
DNA_REPLICATION	302	167	65	65	0.29	0.31	1.06	1.25	1	1	0.349	0.086	0.92	0.746	4842	5454
DOUBLE_STRAND_BREAK_REPAIR	743	168	15	15	0.22	0.28	0.66	0.87	1	1	0.923	0.656	1	0.994	6527	4672
DOUBLE_STRANDED_DNA_BINDING	83	169	26	26	0.39	0.35	1.29	1.25	1	1	0.09	0.127	0.673	0.778	1942	3197
ECTODERM_DEVELOPMENT	632	170	49	49	0.22	0.15	0.81	0.57	1	1	0.85	0.997	1	1	5329	6465
ELECTRON_CARRIER_ACTIVITY	530	171	44	44	0.25	0.19	0.89	0.7	1	1	0.722	0.948	1	1	2133	6457
ELECTRON_TRANSPORT_GO_0006118	738	172	28	28	0.2	0.21	0.66	0.75	1	1	0.944	0.875	1	1	2509	6405
EMBRYONIC_DEVELOPMENT	435	173	42	42	0.27	0.28	0.95	1.08	1	1	0.633	0.334	1	0.883	5468	3334
ENDOMEMBRANE_SYSTEM	408	174	137	137	0.25	0.25	0.97	1.08	1	1	0.596	0.264	1	0.879	4127	5110
ENDONUCLEASE_ACTIVITY	564	175	16	16	0.28	0.29	0.86	0.92	1	1	0.695	0.61	1	0.982	4778	3388
ENDOPEPTIDASE_ACTIVITY	280	176	77	77	0.29	0.2	1.08	0.8	1	1	0.299	0.902	0.9	0.998	4013	4302
ENDOPLASMIC_RETICULUM	476	177	185	185	0.23	0.25	0.92	1.11	1	1	0.746	0.183	1	0.84	6214	5193
ENDOPLASMIC_RETICULUM_MEMBRANE	584	178	56	56	0.23	0.25	0.85	0.98	1	1	0.803	0.528	1	0.933	5139	4145
ENDOPLASMIC_RETICULUM_PART	557	179	65	65	0.23	0.26	0.87	1.04	1	1	0.784	0.418	1	0.927	4998	3627
ENDOSOME	129	180	46	46	0.34	0.22	1.21	0.82	1	1	0.143	0.808	0.784	1	4091	5576
ENDOSOME_TRANSPORT	130	181	16	16	0.41	0.27	1.21	0.87	1	1	0.193	0.694	0.781	0.991	2558	4719
ENERGY_DERIVATION_BY_OXIDATION_OF_ORGANIC_COMPOUNDS	191	182	26	26	0.35	0.24	1.15	0.86	1	1	0.267	0.709	0.849	0.992	4006	4867
ENVELOPE	396	183	113	113	0.25	0.28	0.98	1.17	1	1	0.556	0.123	1	0.755	4431	5039
ENZYME_ACTIVATOR_ACTIVITY	159	184	72	72	0.31	0.29	1.18	1.16	1	1	0.137	0.168	0.824	0.761	4146	2511
ENZYME_BINDING	414	185	112	112	0.25	0.3	0.96	1.25	1	1	0.599	0.046	1	0.764	5826	4526
ENZYME_INHIBITOR_ACTIVITY	127	186	78	78	0.32	0.17	1.22	0.69	1	1	0.073	0.977	0.76	0.998	5080	5546
ENZYME_LINKED_RECEPTOR_PROTEIN_SIGNALING_PATHWAY	362	187	101	101	0.26	0.31	1.01	1.31	1	1	0.477	0.027	1	0.778	3568	3804
ENZYME_REGULATOR_ACTIVITY	198	188	194	194	0.28	0.23	1.14	1	1	1	0.09	0.51	0.844	0.94	4156	3814
EPIDERMAL_GROWTH_FACTOR_RECEPTOR_SIGNALING_PATHWAY	727	189	16	16	0.23	0.36	0.68	1.15	1	1	0.911	0.276	1	0.763	7155	3759
EPIDERMIS_DEVELOPMENT	640	190	44	44	0.23	0.15	0.8	0.58	1	1	0.841	0.996	1	1	2705	5655
ER_GOLGI_INTERMEDIATE_COMPARTMENT	301	191	16	16	0.35	-0.22	1.06	-0.94	1	0.994	0.39	0.566	0.923	0.712	5924	7226
ESTABLISHMENT_AND_OR_MAINTENANCE_OF_CHROMATIN_ARCHITECTURE	141	192	40	40	0.34	0.31	1.2	1.17	1	1	0.164	0.224	0.816	0.753	5094	2415
ESTABLISHMENT_OF_CELLULAR_LOCALIZATION	494	193	204	204	0.23	0.24	0.91	1.05	1	1	0.817	0.33	1	0.898	3809	3979
ESTABLISHMENT_OF_PROTEIN_LOCALIZATION	234	194	102	102	0.29	0.2	1.11	0.85	1	1	0.21	0.859	0.85	0.997	3238	3673
EXCRETION	622	195	20	20	0.26	0.37	0.82	1.25	1	1	0.756	0.161	1	0.75	6647	4179
EXOPEPTIDASE_ACTIVITY	568	196	19	19	0.28	0.27	0.86	0.87	1	1	0.685	0.668	1	0.992	2854	2243
EXTRACELLULAR_MATRIX	751	197	62	62	0.17	0.24	0.63	0.96	1	1	0.986	0.599	1	0.963	7401	5013
EXTRACELLULAR_MATRIX_PART	768	198	39	39	0.16	0.22	0.57	0.81	1	1	0.981	0.818	0.998	0.998	7401	5668
EXTRACELLULAR_MATRIX_STRUCTURAL_CONSTITUENT		11	15	15	-0.24	0.35	-1.03	1.09	0.946	1	0.526	0.343	0.453	0.873	6985	4443
EXTRACELLULAR_REGION	637	199	282	282	0.2	0.21	0.8	0.94	1	1	0.986	0.725	1	0.975	5722	5037
EXTRACELLULAR_REGION_PART	621	200	219	219	0.2	0.2	0.82	0.86	1	1	0.961	0.919	1	0.994	4329	5037
EXTRACELLULAR_SPACE	340	201	163	163	0.26	0.2	1.03	0.87	1	1	0.398	0.839	0.978	0.994	4329	4002
EXTRINSIC_TO_MEMBRANE	526	202	17	17	0.3	0.34	0.89	1.12	1	1	0.659	0.321	1	0.812	4314	3783
FATTY_ACID_METABOLIC_PROCESS	116	203	34	34	0.36	0.33	1.24	1.21	1	1	0.143	0.175	0.735	0.748	3588	4464
FEMALE_PREGNANCY	335	204	27	27	0.31	0.32	1.03	1.12	1	1	0.439	0.307	0.974	0.81	3224	3129
G_PROTEIN_COUPLED_RECEPTOR_ACTIVITY	452	205	100	100	0.24	0.13	0.94	0.53	1	1	0.651	1	1	1	5403	7181
G_PROTEIN_COUPLED_RECEPTOR_BINDING	607	206	32	32	0.24	0.27	0.83	0.98	1	1	0.797	0.508	1	0.934	6370	4283
G_PROTEIN_COUPLED_RECEPTOR_PROTEIN_SIGNALING_PATHWAY	540	207	203	203	0.22	0.16	0.88	0.71	1	1	0.872	0.997	1	1	3404	5862
G_PROTEIN_SIGNALING_ADENYLATE_CYCLASE_ACTIVATING_PATHWAY	228	208	17	17	0.37	0.29	1.12	0.93	1	1	0.302	0.563	0.848	0.985	3404	6579
G_PROTEIN_SIGNALING_COUPLED_TO_CAMP_NUCLEOTIDE_SECOND_MESSENGER	489	209	43	43	0.26	0.21	0.91	0.81	1	1	0.654	0.808	1	0.996	4035	6579
G_PROTEIN_SIGNALING_COUPLED_TO_CYCLIC_NUCLEOTIDE_SECOND_MESSENGER	616	210	73	73	0.22	0.17	0.82	0.7	1	1	0.861	0.972	1	1	6123	6439
G_PROTEIN_SIGNALING_COUPLED_TO_IP3_SECOND_MESSENGERPHOSPHOLIPASE_C_ACTIVATING	80	211	29	29	0.39	0.19	1.3	0.66	1	1	0.092	0.949	0.667	1	3358	5068
G1_S_TRANSITION_OF_MITOTIC_CELL_CYCLE	283	212	23	23	0.33	0.33	1.07	1.12	1	1	0.373	0.29	0.901	0.814	2251	1061
GAMETE_GENERATION	223	213	62	62	0.31	0.26	1.12	1.05	1	1	0.224	0.382	0.844	0.909	2513	4854
GATED_CHANNEL_ACTIVITY	588	214	65	65	0.23	0.16	0.84	0.63	1	1	0.82	0.99	1	0.997	5565	4179
GENERAL_RNA_POLYMERASE_II_TRANSCRIPTION_FACTOR_ACTIVITY	3	215	16	16	0.55	0.44	1.64	1.4	0.868	1	0.004	0.084	0.652	0.899	3037	3477
GENERATION_OF_A_SIGNAL_INVOLVED_IN_CELL_CELL_SIGNALING	609	216	16	16	0.27	0.28	0.82	0.89	1	1	0.747	0.65	1	0.989	6346	543
GENERATION_OF_NEURONS	413	217	48	48	0.27	0.25	0.96	0.94	1	1	0.56	0.613	1	0.972	2826	5489
GENERATION_OF_PRECURSOR_METABOLITES_AND_ENERGY	696	218	77	77	0.19	0.22	0.72	0.91	1	1	0.967	0.711	1	0.985	6753	6598
GLUCOSE_METABOLIC_PROCESS	349	219	21	21	0.32	0.34	1.02	1.15	1	1	0.443	0.251	0.987	0.767	1364	4422
GLYCEROPHOSPHOLIPID_BIOSYNTHETIC_PROCESS	65	220	17	17	0.43	0.23	1.34	0.75	1	1	0.097	0.846	0.601	1	3895	6681
GLYCEROPHOSPHOLIPID_METABOLIC_PROCESS	50	221	21	21	0.43	0.24	1.36	0.82	1	1	0.075	0.775	0.622	0.996	3895	6681
GLYCOPROTEIN_BIOSYNTHETIC_PROCESS	267	222	41	41	0.31	0.23	1.09	0.85	1	1	0.318	0.757	0.891	0.997	2806	6363
GLYCOPROTEIN_METABOLIC_PROCESS	262	223	51	51	0.3	0.25	1.09	0.96	1	1	0.319	0.57	0.889	0.951	1921	2640
GLYCOSAMINOGLYCAN_BINDING	769	224	20	20	0.18	0.23	0.56	0.77	1	1	0.979	0.801	0.998	1	5197	6015
GOLGI_APPARATUS	443	225	125	125	0.24	0.24	0.94	1.02	1	1	0.661	0.44	1	0.931	2859	4799
GOLGI_APPARATUS_PART	315	226	50	50	0.29	0.28	1.05	1.1	1	1	0.397	0.302	0.946	0.856	2859	4936
GOLGI_ASSOCIATED_VESICLE	692	227	16	16	0.24	0.37	0.73	1.16	1	1	0.864	0.251	1	0.767	2859	4936
GOLGI_MEMBRANE	62	228	23	23	0.42	0.33	1.34	1.13	1	1	0.07	0.295	0.615	0.807	2859	4782
GOLGI_VESICLE_TRANSPORT	630	229	27	27	0.24	0.28	0.81	0.99	1	1	0.796	0.517	1	0.932	2617	4936
GROWTH	171	230	41	41	0.33	0.26	1.16	0.99	1	1	0.214	0.494	0.856	0.943	4570	1671
GROWTH_FACTOR_ACTIVITY	654	231	40	40	0.22	0.34	0.78	1.26	1	1	0.856	0.098	1	0.793	4928	4430
GROWTH_FACTOR_BINDING	110	232	27	27	0.37	0.33	1.25	1.18	1	1	0.145	0.214	0.722	0.75	3472	3741
GTP_BINDING	93	233	32	32	0.37	0.28	1.27	0.99	1	1	0.095	0.502	0.7	0.938	3647	5922
GTPASE_ACTIVATOR_ACTIVITY	164	234	31	31	0.35	0.4	1.17	1.46	1	1	0.199	0.027	0.82	0.758	4146	2511
GTPASE_ACTIVITY	582	235	71	71	0.23	0.28	0.85	1.11	1	1	0.829	0.261	1	0.832	6335	4809
GTPASE_BINDING	384	236	16	16	0.33	0.47	0.99	1.5	1	1	0.478	0.04	1	0.841	815	1924
GTPASE_REGULATOR_ACTIVITY	102	237	66	66	0.34	0.34	1.26	1.34	1	1	0.069	0.029	0.716	0.907	4146	2741
GUANYL_NUCLEOTIDE_BINDING	99	238	32	32	0.37	0.28	1.26	1.01	1	1	0.106	0.478	0.695	0.939	3647	5922
GUANYL_NUCLEOTIDE_EXCHANGE_FACTOR_ACTIVITY	350	239	20	20	0.32	0.33	1.02	1.09	1	1	0.45	0.33	0.988	0.861	3682	2603
HEART_DEVELOPMENT		4	24	24	-0.3	0.23	-1.49	0.78	0.173	1	0	0.828	0.272	1	6497	4327
HELICASE_ACTIVITY	291	240	27	27	0.32	0.2	1.07	0.71	1	1	0.366	0.899	0.912	1	5437	3922
HEMATOPOIETIN_INTERFERON_CLASSD200_DOMAIN_CYTOKINE_RECEPTOR_ACTIVITY	323	241	28	28	0.31	0.16	1.04	0.56	1	1	0.407	0.985	0.955	0.999	4484	6685
HEMOPOIESIS	513	242	51	51	0.25	0.25	0.9	0.95	1	1	0.688	0.591	1	0.958	6292	4199
HEMOPOIETIC_OR_LYMPHOID_ORGAN_DEVELOPMENT	505	243	52	52	0.25	0.23	0.91	0.91	1	1	0.68	0.647	1	0.978	6292	4199
HEMOSTASIS	620	244	39	39	0.23	0.15	0.82	0.54	1	1	0.818	0.994	1	0.999	5277	7140
HEPARIN_BINDING	745	245	17	17	0.21	0.21	0.65	0.69	1	1	0.925	0.887	1	0.999	5197	6015
HETEROCYCLE_METABOLIC_PROCESS	436	246	16	16	0.31	0.26	0.95	0.84	1	1	0.539	0.701	1	1	3073	4523
HOMEOSTASIS_OF_NUMBER_OF_CELLS	565	247	16	16	0.29	0.29	0.86	0.91	1	1	0.694	0.602	1	0.978	4410	1863
HOMEOSTATIC_PROCESS	664	248	131	131	0.2	0.19	0.77	0.82	1	1	0.961	0.899	1	1	6484	3664
HORMONE_ACTIVITY	695	249	30	30	0.22	0.27	0.72	0.95	1	1	0.909	0.565	1	0.962	6981	4204
HORMONE_METABOLIC_PROCESS		12	16	16	-0.16	0.35	-0.65	1.1	0.999	1	0.919	0.336	0.97	0.835	7751	4932
HORMONE_RECEPTOR_BINDING	149	250	15	15	0.4	0.36	1.19	1.1	1	1	0.233	0.326	0.821	0.837	4249	4060
HUMORAL_IMMUNE_RESPONSE	125	251	25	25	0.37	0.28	1.23	0.99	1	1	0.153	0.486	0.742	0.942	3690	2558
HYDROGEN_ION_TRANSMEMBRANE_TRANSPORTER_ACTIVITY	757	252	17	17	0.2	0.27	0.62	0.88	1	1	0.933	0.646	0.999	0.989	6339	6408
HYDROLASE_ACTIVITY_ACTING_ON_ACID_ANHYDRIDES	474	253	151	151	0.23	0.29	0.92	1.23	1	1	0.737	0.043	1	0.708	5098	3452
HYDROLASE_ACTIVITY_ACTING_ON_ACID_ANHYDRIDESCATALYZING_TRANSMEMBRANE_MOVEMENT_OF_SUBSTANCES	285	254	29	29	0.32	0.41	1.07	1.47	1	1	0.368	0.021	0.899	0.823	4929	3406
HYDROLASE_ACTIVITY_ACTING_ON_CARBON_NITROGEN_NOT_PEPTIDEBONDS	94	255	23	23	0.39	0.23	1.27	0.78	1	1	0.133	0.803	0.694	1	3249	5279
HYDROLASE_ACTIVITY_ACTING_ON_ESTER_BONDS	566	256	155	155	0.22	0.23	0.86	0.99	1	1	0.868	0.501	1	0.941	2098	6406
HYDROLASE_ACTIVITY_ACTING_ON_GLYCOSYL_BONDS	152	257	24	24	0.37	0.26	1.19	0.89	1	1	0.221	0.671	0.807	0.99	3737	3845
HYDROLASE_ACTIVITY_HYDROLYZING_O_GLYCOSYL_COMPOUNDS	256	258	18	18	0.36	0.3	1.09	1	1	1	0.335	0.471	0.891	0.94	3737	3845
I_KAPPAB_KINASE_NF_KAPPAB_CASCADE	117	259	71	71	0.33	0.26	1.24	1.03	1	1	0.072	0.413	0.731	0.932	3402	2340
IDENTICAL_PROTEIN_BINDING	275	260	187	187	0.27	0.27	1.08	1.2	1	1	0.252	0.051	0.909	0.767	5257	4526
IMMUNE_EFFECTOR_PROCESS	205	261	24	24	0.35	0.33	1.14	1.12	1	1	0.263	0.302	0.837	0.816	4257	3612
IMMUNE_RESPONSE	310	262	166	166	0.27	0.22	1.05	0.96	1	1	0.32	0.624	0.921	0.965	4784	3733
IMMUNE_SYSTEM_DEVELOPMENT	469	263	55	55	0.25	0.24	0.92	0.93	1	1	0.66	0.646	1	0.983	6292	4463
IMMUNE_SYSTEM_PROCESS	487	264	224	224	0.23	0.19	0.92	0.85	1	1	0.79	0.909	1	0.996	4784	4085
INDUCTION_OF_APOPTOSIS_BY_EXTRACELLULAR_SIGNALS	201	265	22	22	0.36	0.3	1.14	1.01	1	1	0.259	0.453	0.843	0.94	2878	4145
INDUCTION_OF_APOPTOSIS_BY_INTRACELLULAR_SIGNALS	371	266	17	17	0.33	0.32	1	1.03	1	1	0.485	0.427	1	0.933	4902	4241
INFLAMMATORY_RESPONSE	278	267	85	85	0.28	0.26	1.08	1.05	1	1	0.3	0.367	0.905	0.898	2761	3670
INORGANIC_CATION_TRANSMEMBRANE_TRANSPORTER_ACTIVITY	405	268	34	34	0.28	0.27	0.97	1	1	1	0.559	0.489	1	0.942	4250	4907
INSULIN_RECEPTOR_SIGNALING_PATHWAY	485	269	15	15	0.31	0.49	0.92	1.52	1	1	0.618	0.029	1	1	3568	3622
INTEGRAL_TO_ENDOPLASMIC_RETICULUM_MEMBRANE	731	270	18	18	0.22	0.36	0.68	1.19	1	1	0.929	0.23	1	0.753	3895	1829
INTEGRAL_TO_ORGANELLE_MEMBRANE	500	271	32	32	0.27	0.31	0.91	1.15	1	1	0.662	0.226	1	0.752	4103	5121
INTEGRIN_BINDING	239	272	16	16	0.37	0.31	1.11	0.99	1	1	0.313	0.494	0.859	0.936	4810	1977
INTERCELLULAR_JUNCTION	693	273	31	31	0.22	0.3	0.73	1.09	1	1	0.903	0.344	1	0.881	6681	4435
INTERLEUKIN_BINDING	251	274	22	22	0.34	0.33	1.1	1.12	1	1	0.31	0.287	0.881	0.822	3472	3741
INTERLEUKIN_RECEPTOR_ACTIVITY	437	275	17	17	0.31	0.31	0.95	0.98	1	1	0.563	0.515	1	0.934	3472	3373
INTERPHASE	518	276	49	49	0.25	0.25	0.9	0.96	1	1	0.716	0.566	1	0.962	2251	4081
INTERPHASE_OF_MITOTIC_CELL_CYCLE	432	277	45	45	0.27	0.27	0.95	1.03	1	1	0.591	0.433	1	0.927	2251	3196
INTRACELLULAR_NON_MEMBRANE_BOUND_ORGANELLE	321	278	345	345	0.25	0.21	1.04	0.96	1	1	0.33	0.651	0.957	0.955	3709	5975
INTRACELLULAR_PROTEIN_TRANSPORT	195	279	81	81	0.3	0.26	1.14	1.07	1	1	0.168	0.321	0.846	0.904	3238	3673
INTRACELLULAR_SIGNALING_CASCADE	131	280	411	411	0.29	0.23	1.21	1.07	1	1	0.002	0.221	0.785	0.894	3404	4315
INTRACELLULAR_TRANSPORT	336	281	169	169	0.26	0.25	1.03	1.07	1	1	0.398	0.307	0.977	0.899	3238	3767
INTRAMOLECULAR_OXIDOREDUCTASE_ACTIVITY	347	282	15	15	0.35	0.38	1.02	1.18	1	1	0.436	0.242	0.983	0.75	4424	2038
INTRINSIC_TO_ENDOPLASMIC_RETICULUM_MEMBRANE	733	283	18	18	0.22	0.36	0.68	1.19	1	1	0.922	0.232	1	0.763	3895	1829
INTRINSIC_TO_ORGANELLE_MEMBRANE	562	284	33	33	0.25	0.3	0.87	1.07	1	1	0.725	0.379	1	0.891	4103	5121
ION_BINDING	425	285	163	163	0.24	0.21	0.96	0.92	1	1	0.646	0.73	1	0.981	4696	4407
ION_CHANNEL_ACTIVITY	624	286	74	74	0.22	0.16	0.81	0.63	1	1	0.878	0.987	1	0.996	5565	5946
ION_HOMEOSTASIS	724	287	85	85	0.18	0.19	0.68	0.76	1	1	0.992	0.934	1	1	6810	6348
ION_TRANSMEMBRANE_TRANSPORTER_ACTIVITY	445	288	152	152	0.24	0.2	0.94	0.86	1	1	0.663	0.861	1	0.992	4585	5830
ION_TRANSPORT	614	289	104	104	0.21	0.26	0.82	1.09	1	1	0.9	0.255	1	0.875	5958	4121
ISOMERASE_ACTIVITY	439	290	28	28	0.28	0.2	0.95	0.71	1	1	0.577	0.912	1	1	5944	2038
JAK_STAT_CASCADE	4	291	21	21	0.49	0.3	1.57	0.99	0.994	1	0.014	0.481	1	0.939	2040	5196
JNK_CASCADE	78	292	26	26	0.4	0.44	1.3	1.54	1	1	0.105	0.014	0.657	1	2357	3045
KINASE_ACTIVITY	245	293	243	243	0.27	0.24	1.1	1.08	1	1	0.16	0.214	0.887	0.878	4611	3275
KINASE_BINDING	567	294	50	50	0.24	0.33	0.86	1.26	1	1	0.783	0.109	1	0.793	5955	4263
KINASE_INHIBITOR_ACTIVITY	25	295	20	20	0.45	0.37	1.43	1.25	1	1	0.047	0.167	0.678	0.758	2095	981
KINASE_REGULATOR_ACTIVITY	123	296	32	32	0.36	0.28	1.23	1.03	1	1	0.145	0.437	0.742	0.927	4137	981
KINETOCHORE	599	297	16	16	0.27	0.43	0.83	1.39	1	1	0.727	0.081	1	0.879	2157	3312
LAMELLIPODIUM	355	298	15	15	0.34	0.26	1.02	0.83	1	1	0.446	0.738	0.985	1	5839	3376
LEADING_EDGE	358	299	29	29	0.3	0.29	1.01	1.01	1	1	0.485	0.473	0.989	0.938	5839	3452
LEUKOCYTE_ACTIVATION	659	300	43	43	0.22	0.22	0.78	0.83	1	1	0.88	0.796	1	1	6231	4085
LEUKOCYTE_DIFFERENTIATION	444	301	25	25	0.29	0.35	0.94	1.21	1	1	0.577	0.171	1	0.753	6231	4430
LIGAND_DEPENDENT_NUCLEAR_RECEPTOR_ACTIVITY	404	302	21	21	0.31	0.39	0.97	1.29	1	1	0.534	0.112	1	0.829	4701	3478
LIGAND_GATED_CHANNEL_ACTIVITY	644	303	21	21	0.25	0.21	0.8	0.7	1	1	0.781	0.894	1	1	5565	3846
LIGASE_ACTIVITY	143	304	54	54	0.33	0.32	1.19	1.25	1	1	0.141	0.093	0.829	0.786	2676	5368
LIGASE_ACTIVITY_FORMING_CARBON_NITROGEN_BONDS	45	305	38	38	0.39	0.37	1.37	1.36	1	1	0.039	0.047	0.655	0.9	2676	2272
LIPASE_ACTIVITY	605	306	28	28	0.25	0.11	0.83	0.38	1	1	0.782	1	1	1	5742	1853
LIPID_BINDING	706	307	55	55	0.2	0.27	0.71	1.06	1	1	0.958	0.378	1	0.903	5969	4187
LIPID_BIOSYNTHETIC_PROCESS	237	308	61	61	0.3	0.22	1.11	0.88	1	1	0.252	0.739	0.861	0.985	3895	6700
LIPID_CATABOLIC_PROCESS	488	309	17	17	0.29	0.34	0.91	1.08	1	1	0.623	0.366	1	0.881	5652	5379
LIPID_METABOLIC_PROCESS	421	310	184	184	0.24	0.22	0.96	0.95	1	1	0.628	0.658	1	0.96	4695	4670
LIPID_RAFT	162	311	20	20	0.37	0.28	1.17	0.93	1	1	0.223	0.575	0.826	0.985	3465	3784
LIPID_TRANSPORT	181	312	22	22	0.36	0.21	1.15	0.72	1	1	0.245	0.899	0.87	1	2759	5734
LIPID_TRANSPORTER_ACTIVITY	495	313	20	20	0.29	0.28	0.91	0.93	1	1	0.634	0.596	1	0.983	5775	2516
LIPOPROTEIN_METABOLIC_PROCESS	27	314	17	17	0.46	0.28	1.42	0.9	1	1	0.048	0.641	0.665	0.989	3895	3627
LOCOMOTORY_BEHAVIOR	657	315	67	67	0.21	0.25	0.78	1	1	1	0.893	0.493	1	0.937	6559	3670
LYASE_ACTIVITY	233	316	43	43	0.32	0.34	1.12	1.28	1	1	0.277	0.098	0.848	0.801	3199	4059
LYMPHOCYTE_ACTIVATION	631	317	41	41	0.23	0.2	0.81	0.75	1	1	0.831	0.88	1	1	6231	4085
LYMPHOCYTE_DIFFERENTIATION	574	318	18	18	0.28	0.41	0.86	1.33	1	1	0.707	0.106	1	0.816	6231	4430
LYSOSOME	493	319	36	36	0.26	0.22	0.91	0.81	1	1	0.662	0.805	1	0.995	4029	6513
LYTIC_VACUOLE	496	320	36	36	0.26	0.22	0.91	0.8	1	1	0.665	0.815	1	0.997	4029	6513
M_PHASE	674	321	71	71	0.2	0.23	0.75	0.92	1	1	0.929	0.663	1	0.982	5955	4036
M_PHASE_OF_MITOTIC_CELL_CYCLE	639	322	53	53	0.22	0.23	0.8	0.89	1	1	0.875	0.7	1	0.984	3534	4036
MACROMOLECULAR_COMPLEX_ASSEMBLY	156	323	161	161	0.3	0.25	1.18	1.07	1	1	0.069	0.298	0.837	0.895	4306	4526
MACROMOLECULE_BIOSYNTHETIC_PROCESS	328	324	178	178	0.26	0.25	1.04	1.07	1	1	0.352	0.284	0.951	0.892	4458	3848
MACROMOLECULE_CATABOLIC_PROCESS	281	325	88	88	0.28	0.28	1.08	1.14	1	1	0.294	0.181	0.898	0.779	3730	4887
MACROMOLECULE_LOCALIZATION	165	326	124	124	0.3	0.2	1.17	0.85	1	1	0.091	0.842	0.817	0.996	3238	3673
MAGNESIUM_ION_BINDING	84	327	29	29	0.38	0.24	1.29	0.85	1	1	0.099	0.749	0.675	0.996	3029	5617
MAPKKK_CASCADE_GO_0000165	118	328	62	62	0.33	0.3	1.23	1.19	1	1	0.084	0.143	0.733	0.76	3184	3045
MEIOTIC_CELL_CYCLE	699	329	23	23	0.23	0.25	0.72	0.88	1	1	0.894	0.66	1	0.99	2343	5454
MEMBRANE_BOUND_VESICLE	578	330	66	66	0.23	0.27	0.85	1.07	1	1	0.807	0.361	1	0.896	4820	5598
MEMBRANE_ENCLOSED_LUMEN	86	331	251	251	0.32	0.26	1.28	1.16	1	1	0.002	0.073	0.682	0.755	4020	4737
MEMBRANE_FRACTION	473	332	206	206	0.23	0.17	0.92	0.74	1	1	0.767	0.993	1	1	4879	5574
MEMBRANE_FUSION	750	333	19	19	0.2	0.28	0.63	0.92	1	1	0.937	0.616	1	0.979	2867	3809
MEMBRANE_LIPID_BIOSYNTHETIC_PROCESS	348	334	28	28	0.31	0.25	1.02	0.9	1	1	0.448	0.646	0.983	0.986	3895	6681
MEMBRANE_LIPID_METABOLIC_PROCESS	583	335	57	57	0.23	0.23	0.85	0.91	1	1	0.783	0.677	1	0.98	5583	6535
MEMBRANE_ORGANIZATION_AND_BIOGENESIS	305	336	79	79	0.28	0.29	1.06	1.16	1	1	0.355	0.162	0.918	0.768	2867	3809
MESODERM_DEVELOPMENT	135	337	17	17	0.4	0.44	1.21	1.43	1	1	0.204	0.057	0.773	0.854	1224	4536
METAL_ION_TRANSMEMBRANE_TRANSPORTER_ACTIVITY	548	338	77	77	0.23	0.23	0.88	0.93	1	1	0.777	0.665	1	0.98	5565	4144
METAL_ION_TRANSPORT	705	339	64	64	0.19	0.25	0.71	1	1	1	0.966	0.5	1	0.943	5287	4121
METALLOENDOPEPTIDASE_ACTIVITY	555	340	18	18	0.28	0.21	0.87	0.69	1	1	0.689	0.887	1	1	4874	7056
METALLOPEPTIDASE_ACTIVITY	450	341	28	28	0.28	0.17	0.94	0.61	1	1	0.595	0.974	1	1	3916	7056
METHYLTRANSFERASE_ACTIVITY	462	342	24	24	0.29	0.37	0.93	1.29	1	1	0.612	0.122	1	0.837	5246	3833
MICROBODY	501	343	27	27	0.27	0.34	0.91	1.2	1	1	0.649	0.186	1	0.759	3305	1647
MICROSOME	698	344	26	26	0.22	0.35	0.72	1.23	1	1	0.887	0.161	1	0.707	6253	3345
MICROTUBULE	124	345	22	22	0.38	0.2	1.23	0.69	1	1	0.167	0.903	0.746	1	3534	6196
MICROTUBULE_ASSOCIATED_COMPLEX	308	346	22	22	0.33	0.38	1.06	1.31	1	1	0.41	0.112	0.92	0.797	1283	1804
MICROTUBULE_BASED_PROCESS	475	347	47	47	0.26	0.21	0.92	0.82	1	1	0.653	0.811	1	0.998	4361	5228
MICROTUBULE_BINDING	2	348	16	16	0.55	0.28	1.67	0.89	0.757	1	0.005	0.658	0.67	0.989	944	5806
MICROTUBULE_CYTOSKELETON	504	349	81	81	0.24	0.22	0.91	0.9	1	1	0.729	0.717	1	0.987	3534	5895
MICROTUBULE_CYTOSKELETON_ORGANIZATION_AND_BIOGENESIS	10	350	19	19	0.49	0.27	1.52	0.9	0.998	1	0.028	0.626	0.724	0.991	3920	1875
MICROTUBULE_ORGANIZING_CENTER	771	351	33	33	0.16	0.22	0.55	0.82	1	1	0.985	0.79	0.997	0.997	6812	6481
MITOCHONDRIAL_ENVELOPE	457	352	69	69	0.25	0.28	0.94	1.13	1	1	0.629	0.219	1	0.797	5743	5039
MITOCHONDRIAL_INNER_MEMBRANE	254	353	50	50	0.3	0.25	1.09	0.96	1	1	0.309	0.568	0.885	0.955	4431	5039
MITOCHONDRIAL_LUMEN	383	354	35	35	0.29	0.21	0.99	0.78	1	1	0.509	0.847	1	1	1763	5798
MITOCHONDRIAL_MATRIX	364	355	35	35	0.29	0.21	1.01	0.79	1	1	0.473	0.838	1	1	1763	5798
MITOCHONDRIAL_MEMBRANE	431	356	64	64	0.26	0.29	0.95	1.16	1	1	0.594	0.167	1	0.754	5743	5039
MITOCHONDRIAL_MEMBRANE_PART	294	357	36	36	0.31	0.27	1.06	1	1	1	0.361	0.494	0.916	0.941	3159	6455
MITOCHONDRIAL_PART	528	358	103	103	0.23	0.25	0.89	1.06	1	1	0.754	0.344	1	0.897	5743	5039
MITOCHONDRIAL_RESPIRATORY_CHAIN	366	359	18	18	0.33	0.28	1	0.9	1	1	0.459	0.635	1	0.987	4006	6455
MITOCHONDRIAL_RIBOSOME	133	360	18	18	0.39	0.2	1.21	0.63	1	1	0.215	0.942	0.776	1	1638	4688
MITOCHONDRIAL_TRANSPORT	194	361	17	17	0.38	0.5	1.14	1.6	1	0.986	0.266	0.01	0.848	1	1942	3742
MITOCHONDRION	472	362	227	227	0.23	0.23	0.92	1.03	1	1	0.774	0.355	1	0.933	4722	4718
MITOCHONDRION_ORGANIZATION_AND_BIOGENESIS	147	363	31	31	0.35	0.33	1.19	1.19	1	1	0.191	0.199	0.823	0.76	1942	5419
MITOSIS	675	364	52	52	0.21	0.24	0.75	0.92	1	1	0.931	0.662	1	0.979	3534	4036
MITOTIC_CELL_CYCLE	454	365	100	100	0.24	0.23	0.94	0.97	1	1	0.652	0.55	1	0.943	5271	3208
MITOTIC_CELL_CYCLE_CHECKPOINT	774	366	15	15	0.18	0.41	0.54	1.27	1	1	0.979	0.149	0.995	0.791	6899	2969
MOLECULAR_ADAPTOR_ACTIVITY	602	367	28	28	0.25	0.33	0.83	1.19	1	1	0.773	0.197	1	0.761	5011	2303
MONOCARBOXYLIC_ACID_METABOLIC_PROCESS	210	368	48	48	0.31	0.32	1.13	1.24	1	1	0.248	0.112	0.845	0.716	3305	4625
MONOVALENT_INORGANIC_CATION_TRANSMEMBRANE_TRANSPORTER_ACTIVITY	601	369	20	20	0.26	0.28	0.83	0.92	1	1	0.734	0.598	1	0.978	4250	6408
MONOVALENT_INORGANIC_CATION_TRANSPORT	556	370	49	49	0.24	0.19	0.87	0.75	1	1	0.755	0.9	1	1	4200	4121
MOTOR_ACTIVITY	547	371	18	18	0.29	0.32	0.88	1.06	1	1	0.69	0.398	1	0.894	6547	5871
MRNA_BINDING	236	372	18	18	0.36	0.37	1.11	1.22	1	1	0.303	0.206	0.859	0.742	4274	3062
MRNA_METABOLIC_PROCESS	213	373	44	44	0.32	0.34	1.13	1.29	1	1	0.256	0.074	0.85	0.838	3971	5283
MRNA_PROCESSING_GO_0006397	449	374	37	37	0.27	0.34	0.94	1.27	1	1	0.6	0.101	1	0.784	3246	5283
MULTI_ORGANISM_PROCESS	510	375	92	92	0.24	0.18	0.9	0.75	1	1	0.738	0.943	1	1	6456	5443
MUSCLE_CELL_DIFFERENTIATION	121	376	15	15	0.41	0.36	1.23	1.14	1	1	0.181	0.298	0.741	0.778	4070	1856
MUSCLE_DEVELOPMENT	498	377	69	69	0.25	0.22	0.91	0.88	1	1	0.702	0.761	1	0.989	4070	4979
MYELOID_CELL_DIFFERENTIATION	569	378	25	25	0.26	0.29	0.86	1.01	1	1	0.707	0.463	1	0.939	6458	4199
NEGATIVE_REGULATION_OF_APOPTOSIS	155	379	116	116	0.31	0.25	1.18	1.05	1	1	0.1	0.341	0.825	0.898	3817	4460
NEGATIVE_REGULATION_OF_BIOLOGICAL_PROCESS	196	380	427	427	0.27	0.24	1.14	1.08	1	1	0.041	0.186	0.844	0.881	3985	3693
NEGATIVE_REGULATION_OF_BIOSYNTHETIC_PROCESS	318	381	21	21	0.33	0.22	1.04	0.73	1	1	0.412	0.861	0.956	1	4132	3848
NEGATIVE_REGULATION_OF_CATALYTIC_ACTIVITY	40	382	44	44	0.39	0.26	1.37	0.97	1	1	0.033	0.529	0.709	0.942	3821	3548
NEGATIVE_REGULATION_OF_CELL_ADHESION	619	383	15	15	0.28	0.33	0.82	1.04	1	1	0.741	0.442	1	0.932	3960	3331
NEGATIVE_REGULATION_OF_CELL_CYCLE	618	384	53	53	0.22	0.35	0.82	1.37	1	1	0.828	0.037	1	0.899	6059	4188
NEGATIVE_REGULATION_OF_CELL_DIFFERENTIATION	714	385	20	20	0.22	0.36	0.7	1.21	1	1	0.909	0.198	1	0.741	6458	4199
NEGATIVE_REGULATION_OF_CELL_PROLIFERATION	217	386	101	101	0.29	0.27	1.13	1.11	1	1	0.194	0.233	0.855	0.823	4581	3378
NEGATIVE_REGULATION_OF_CELLULAR_BIOSYNTHETIC_PROCESS	326	387	21	21	0.33	0.22	1.04	0.74	1	1	0.415	0.842	0.951	1	4132	3848
NEGATIVE_REGULATION_OF_CELLULAR_COMPONENT_ORGANIZATION_AND_BIOGENESIS	322	388	20	20	0.33	0.4	1.04	1.32	1	1	0.418	0.104	0.957	0.793	3920	3312
NEGATIVE_REGULATION_OF_CELLULAR_METABOLIC_PROCESS	101	389	152	152	0.32	0.27	1.26	1.16	1	1	0.02	0.096	0.722	0.766	4396	2499
NEGATIVE_REGULATION_OF_CELLULAR_PROCESS	211	390	409	409	0.27	0.24	1.13	1.07	1	1	0.059	0.203	0.841	0.89	4515	3693
NEGATIVE_REGULATION_OF_CELLULAR_PROTEIN_METABOLIC_PROCESS	114	391	32	32	0.36	0.25	1.24	0.92	1	1	0.14	0.614	0.739	0.981	4132	3848
NEGATIVE_REGULATION_OF_DEVELOPMENTAL_PROCESS	184	392	148	148	0.29	0.25	1.15	1.09	1	1	0.114	0.24	0.864	0.878	3817	4460
NEGATIVE_REGULATION_OF_GROWTH	70	393	23	23	0.41	0.29	1.32	0.98	1	1	0.092	0.509	0.634	0.935	4428	1209
NEGATIVE_REGULATION_OF_METABOLIC_PROCESS	109	394	154	154	0.31	0.27	1.25	1.18	1	1	0.03	0.089	0.721	0.748	4396	2499
NEGATIVE_REGULATION_OF_MULTICELLULAR_ORGANISMAL_PROCESS	563	395	21	21	0.27	0.15	0.86	0.5	1	1	0.693	0.993	1	1	6444	7103
NEGATIVE_REGULATION_OF_NUCLEOBASENUCLEOSIDENUCLEOTIDE_AND_NUCLEIC_ACID_METABOLIC_PROCESS	54	396	116	116	0.35	0.28	1.36	1.17	1	1	0.004	0.116	0.616	0.753	3437	2432
NEGATIVE_REGULATION_OF_PROGRAMMED_CELL_DEATH	150	397	116	116	0.31	0.25	1.19	1.05	1	1	0.078	0.342	0.816	0.896	3817	4460
NEGATIVE_REGULATION_OF_PROTEIN_METABOLIC_PROCESS	107	398	34	34	0.37	0.25	1.25	0.92	1	1	0.115	0.629	0.709	0.98	4132	3848
NEGATIVE_REGULATION_OF_RNA_METABOLIC_PROCESS	47	399	69	69	0.37	0.34	1.37	1.35	1	1	0.012	0.028	0.636	0.91	2434	2432
NEGATIVE_REGULATION_OF_SIGNAL_TRANSDUCTION	370	400	24	24	0.31	0.26	1	0.89	1	1	0.488	0.653	1	0.986	3032	6491
NEGATIVE_REGULATION_OF_TRANSCRIPTION	32	401	102	102	0.36	0.27	1.39	1.15	1	1	0.003	0.165	0.743	0.767	3437	2432
NEGATIVE_REGULATION_OF_TRANSCRIPTION_DNA_DEPENDENT	46	402	69	69	0.37	0.34	1.37	1.34	1	1	0.016	0.022	0.644	0.907	2434	2432
NEGATIVE_REGULATION_OF_TRANSCRIPTION_FROM_RNA_POLYMERASE_II_PROMOTER	59	403	44	44	0.38	0.27	1.35	1.02	1	1	0.042	0.445	0.601	0.929	2689	2432
NEGATIVE_REGULATION_OF_TRANSFERASE_ACTIVITY	100	404	21	21	0.4	0.35	1.26	1.18	1	1	0.127	0.219	0.726	0.752	4189	981
NEGATIVE_REGULATION_OF_TRANSLATION	277	405	16	16	0.36	0.23	1.08	0.72	1	1	0.369	0.869	0.908	1	4132	4423
NERVOUS_SYSTEM_DEVELOPMENT	591	406	231	231	0.21	0.2	0.84	0.87	1	1	0.941	0.876	1	0.991	4160	5819
NEURITE_DEVELOPMENT	456	407	32	32	0.28	0.3	0.94	1.09	1	1	0.619	0.341	1	0.877	4132	3326
NEUROGENESIS	374	408	54	54	0.27	0.23	1	0.9	1	1	0.511	0.7	1	0.986	2826	5489
NEUROLOGICAL_SYSTEM_PROCESS	704	409	206	206	0.18	0.19	0.71	0.82	1	1	0.999	0.951	1	1	6312	5862
NEURON_DEVELOPMENT	399	410	35	35	0.28	0.26	0.98	0.97	1	1	0.524	0.555	1	0.943	4132	4435
NEURON_DIFFERENTIATION	586	411	42	42	0.24	0.25	0.85	0.93	1	1	0.784	0.648	1	0.981	2819	4199
NEURON_PROJECTION	508	412	15	15	0.3	0.22	0.9	0.7	1	1	0.614	0.905	1	0.999	4810	3072
NEUROPEPTIDE_BINDING	537	413	17	17	0.29	-0.2	0.89	-0.93	1	0.994	0.67	0.679	1	0.648	4808	6250
NEUROPEPTIDE_RECEPTOR_ACTIVITY	532	414	17	17	0.29	-0.2	0.89	-0.77	1	1	0.638	0.853	1	0.792	4808	6250
NEUROTRANSMITTER_BINDING	441	415	35	35	0.27	0.18	0.95	0.65	1	1	0.586	0.961	1	1	4808	3729
NEUROTRANSMITTER_RECEPTOR_ACTIVITY	470	416	33	33	0.27	0.18	0.92	0.67	1	1	0.638	0.943	1	1	4808	5068
NITROGEN_COMPOUND_BIOSYNTHETIC_PROCESS	379	417	18	18	0.32	0.28	0.99	0.92	1	1	0.502	0.612	1	0.981	3853	4498
NITROGEN_COMPOUND_CATABOLIC_PROCESS	633	418	22	22	0.25	0.13	0.81	0.43	1	1	0.784	1	1	1	3122	3875
NITROGEN_COMPOUND_METABOLIC_PROCESS	571	419	102	102	0.22	0.25	0.86	1.05	1	1	0.847	0.34	1	0.895	3910	3959
NON_MEMBRANE_BOUND_ORGANELLE	334	420	345	345	0.25	0.21	1.03	0.96	1	1	0.341	0.654	0.959	0.957	3709	5975
NUCLEAR_BODY	264	421	19	19	0.35	0.31	1.09	1.03	1	1	0.351	0.435	0.891	0.935	4227	3517
NUCLEAR_CHROMOSOME	394	422	31	31	0.29	0.24	0.98	0.89	1	1	0.516	0.691	1	0.99	3662	6073
NUCLEAR_CHROMOSOME_PART	490	423	22	22	0.28	0.24	0.91	0.82	1	1	0.641	0.758	1	0.996	4884	6073
NUCLEAR_ENVELOPE	274	424	46	46	0.31	0.3	1.08	1.16	1	1	0.338	0.203	0.902	0.751	3216	4816
NUCLEAR_ENVELOPE_ENDOPLASMIC_RETICULUM_NETWORK	412	425	61	61	0.26	0.25	0.97	0.99	1	1	0.557	0.524	1	0.935	4127	6535
NUCLEAR_EXPORT	87	426	16	16	0.42	0.39	1.28	1.26	1	1	0.125	0.177	0.676	0.788	3939	874
NUCLEAR_IMPORT	23	427	29	29	0.42	0.2	1.44	0.7	1	1	0.03	0.917	0.707	1	3024	2008
NUCLEAR_LUMEN	55	428	199	199	0.34	0.28	1.36	1.21	1	1	0	0.028	0.606	0.749	4020	4432
NUCLEAR_MEMBRANE	359	429	29	29	0.3	0.33	1.01	1.2	1	1	0.457	0.175	0.987	0.766	3216	4732
NUCLEAR_MEMBRANE_PART	353	430	24	24	0.31	0.36	1.02	1.24	1	1	0.457	0.164	0.988	0.726	3216	4732
NUCLEAR_ORGANIZATION_AND_BIOGENESIS	345	431	17	17	0.34	0.31	1.02	1	1	1	0.442	0.469	0.976	0.94	4863	4241
NUCLEAR_PART	73	432	302	302	0.32	0.26	1.31	1.18	1	1	0	0.031	0.645	0.748	4020	4737
NUCLEAR_PORE	536	433	17	17	0.29	0.36	0.89	1.19	1	1	0.649	0.232	1	0.761	3741	4665
NUCLEAR_TRANSPORT	34	434	49	49	0.39	0.27	1.39	1.04	1	1	0.014	0.419	0.743	0.933	3939	2295
NUCLEASE_ACTIVITY	523	435	33	33	0.26	0.33	0.89	1.2	1	1	0.689	0.19	1	0.763	1972	4848
NUCLEOBASENUCLEOSIDE_AND_NUCLEOTIDE_METABOLIC_PROCESS	12	436	32	32	0.44	0.3	1.51	1.08	0.999	1	0.013	0.347	0.642	0.873	3680	2683
NUCLEOBASENUCLEOSIDENUCLEOTIDE_AND_NUCLEIC_ACID_TRANSPORT	375	437	18	18	0.32	0.28	1	0.89	1	1	0.481	0.658	1	0.988	3939	1820
NUCLEOBASENUCLEOSIDENUCLEOTIDE_KINASE_ACTIVITY	735	438	18	18	0.21	0.42	0.67	1.35	1	1	0.915	0.088	1	0.892	5178	4188
NUCLEOCYTOPLASMIC_TRANSPORT	49	439	48	48	0.38	0.25	1.37	0.97	1	1	0.031	0.546	0.623	0.941	3939	2870
NUCLEOLUS	53	440	59	59	0.37	0.3	1.36	1.19	1	1	0.023	0.142	0.626	0.76	3961	4248
NUCLEOPLASM	44	441	152	152	0.34	0.29	1.37	1.24	1	1	0	0.043	0.665	0.707	4020	4432
NUCLEOPLASM_PART	24	442	117	117	0.37	0.3	1.43	1.28	1	1	0.001	0.028	0.685	0.817	4227	4432
NUCLEOSIDE_TRIPHOSPHATASE_ACTIVITY	539	443	140	140	0.22	0.29	0.88	1.27	1	1	0.827	0.036	1	0.791	5098	3452
NUCLEOTIDE_BINDING	200	444	128	128	0.29	0.22	1.14	0.96	1	1	0.137	0.625	0.843	0.963	3075	5931
NUCLEOTIDE_METABOLIC_PROCESS	15	445	26	26	0.46	0.26	1.5	0.89	0.999	1	0.019	0.649	0.594	0.983	2783	2683
NUCLEOTIDYLTRANSFERASE_ACTIVITY	167	446	32	32	0.34	0.24	1.17	0.88	1	1	0.213	0.675	0.814	0.986	4165	6437
ONE_CARBON_COMPOUND_METABOLIC_PROCESS	382	447	16	16	0.33	0.42	0.99	1.33	1	1	0.502	0.104	1	0.863	3215	1286
ORGAN_DEVELOPMENT	579	448	387	387	0.21	0.21	0.85	0.95	1	1	0.961	0.704	1	0.959	5392	4536
ORGAN_MORPHOGENESIS	461	449	101	101	0.24	0.27	0.94	1.14	1	1	0.669	0.179	1	0.77	3760	4228
ORGANELLAR_RIBOSOME	137	450	18	18	0.39	0.2	1.2	0.63	1	1	0.195	0.948	0.789	1	1638	4688
ORGANELLE_ENVELOPE	390	451	113	113	0.25	0.28	0.98	1.17	1	1	0.527	0.133	1	0.759	4431	5039
ORGANELLE_INNER_MEMBRANE	219	452	55	55	0.31	0.26	1.12	1.01	1	1	0.232	0.454	0.85	0.941	4431	3967
ORGANELLE_LUMEN	85	453	251	251	0.32	0.26	1.29	1.15	1	1	0.004	0.066	0.673	0.756	4020	4737
ORGANELLE_MEMBRANE	423	454	191	191	0.24	0.26	0.96	1.12	1	1	0.64	0.135	1	0.813	4431	5121
ORGANELLE_ORGANIZATION_AND_BIOGENESIS	598	455	255	255	0.2	0.22	0.83	0.99	1	1	0.959	0.517	1	0.939	5194	2936
ORGANELLE_OUTER_MEMBRANE	645	456	16	16	0.26	0.46	0.8	1.43	1	1	0.783	0.047	1	0.856	2267	4732
ORGANIC_ACID_METABOLIC_PROCESS	428	457	112	112	0.25	0.26	0.95	1.08	1	1	0.634	0.281	1	0.882	4034	4498
ORGANIC_ACID_TRANSMEMBRANE_TRANSPORTER_ACTIVITY	711	458	26	26	0.21	0.35	0.7	1.23	1	1	0.907	0.158	1	0.722	3942	4335
ORGANIC_ACID_TRANSPORT	678	459	24	24	0.23	0.37	0.75	1.28	1	1	0.878	0.121	1	0.814	5142	4284
OUTER_MEMBRANE	658	460	16	16	0.26	0.46	0.78	1.47	1	1	0.815	0.047	1	0.795	2267	4732
OXIDOREDUCTASE_ACTIVITY	604	461	168	168	0.21	0.22	0.83	0.93	1	1	0.936	0.709	1	0.986	6361	4934
OXIDOREDUCTASE_ACTIVITY_ACTING_ON_CH_OH_GROUP_OF_DONORS	683	462	33	33	0.21	0.28	0.74	1.04	1	1	0.895	0.418	1	0.929	5944	3936
OXIDOREDUCTASE_ACTIVITY_ACTING_ON_THE_ALDEHYDE_OR_OXO_GROUP_OF_DONORS	484	463	15	15	0.31	0.37	0.92	1.17	1	1	0.596	0.232	1	0.753	5213	4490
OXIDOREDUCTASE_ACTIVITY_ACTING_ON_THE_CH_CH_GROUP_OF_DONORS	669	464	15	15	0.26	0.26	0.76	0.83	1	1	0.806	0.729	1	1	4406	4922
OXIDOREDUCTASE_ACTIVITY_GO_0016616	662	465	31	31	0.23	0.25	0.77	0.9	1	1	0.86	0.672	1	0.986	5944	3936
OXIDOREDUCTASE_ACTIVITY_GO_0016705	179	466	23	23	0.36	0.34	1.15	1.16	1	1	0.249	0.233	0.865	0.767	662	3682
PATTERN_BINDING	748	467	23	23	0.2	0.26	0.63	0.9	1	1	0.951	0.642	1	0.987	5197	4414
PATTERN_SPECIFICATION_PROCESS	534	468	26	26	0.27	0.38	0.89	1.32	1	1	0.666	0.09	1	0.797	5468	4024
PEPTIDASE_ACTIVITY	232	469	107	107	0.29	0.19	1.12	0.81	1	1	0.181	0.906	0.85	0.995	4013	6173
PEPTIDE_BINDING	372	470	65	65	0.27	0.15	1	0.6	1	1	0.485	0.989	1	1	2409	7135
PEPTIDE_RECEPTOR_ACTIVITY	357	471	38	38	0.29	-0.15	1.01	-1	1	0.988	0.477	0.5	0.99	0.84	4920	6917
PEPTIDYL_AMINO_ACID_MODIFICATION	261	472	36	36	0.31	0.23	1.09	0.87	1	1	0.329	0.711	0.892	0.992	4564	6128
PEPTIDYL_TYROSINE_MODIFICATION	68	473	20	20	0.42	0.32	1.32	1.08	1	1	0.08	0.356	0.646	0.876	3616	5336
PEPTIDYL_TYROSINE_PHOSPHORYLATION	146	474	18	18	0.39	0.33	1.19	1.08	1	1	0.232	0.356	0.827	0.879	3616	5336
PERINUCLEAR_REGION_OF_CYTOPLASM	356	475	39	39	0.29	0.24	1.01	0.9	1	1	0.465	0.671	0.989	0.986	2004	5115
PEROXISOME	486	476	27	27	0.27	0.34	0.92	1.18	1	1	0.624	0.196	1	0.75	3305	1647
PHOSPHATASE_REGULATOR_ACTIVITY	665	477	17	17	0.25	0.24	0.77	0.77	1	1	0.785	0.819	1	1	5941	4728
PHOSPHOINOSITIDE_MEDIATED_SIGNALING	63	478	30	30	0.4	0.2	1.34	0.72	1	1	0.076	0.89	0.613	1	3358	5068
PHOSPHOINOSITIDE_METABOLIC_PROCESS	91	479	15	15	0.43	0.26	1.28	0.81	1	1	0.136	0.759	0.688	0.996	3895	6681
PHOSPHOLIPASE_ACTIVITY	516	480	22	22	0.28	0.17	0.9	0.59	1	1	0.666	0.967	1	1	5742	1853
PHOSPHOLIPID_BINDING	629	481	27	27	0.25	0.39	0.81	1.39	1	1	0.796	0.04	1	0.865	5969	4187
PHOSPHOLIPID_BIOSYNTHETIC_PROCESS	153	482	22	22	0.37	0.25	1.18	0.83	1	1	0.21	0.751	0.821	1	3895	6681
PHOSPHOLIPID_METABOLIC_PROCESS	465	483	37	37	0.27	0.23	0.93	0.85	1	1	0.615	0.753	1	0.998	5536	6838
PHOSPHOPROTEIN_PHOSPHATASE_ACTIVITY	266	484	51	51	0.3	0.28	1.09	1.07	1	1	0.305	0.32	0.893	0.89	2050	5747
PHOSPHORIC_DIESTER_HYDROLASE_ACTIVITY	655	485	21	21	0.25	0.34	0.78	1.14	1	1	0.817	0.286	1	0.772	2669	3027
PHOSPHORIC_ESTER_HYDROLASE_ACTIVITY	311	486	90	90	0.27	0.24	1.05	0.99	1	1	0.355	0.519	0.924	0.935	2050	5835
PHOSPHORIC_MONOESTER_HYDROLASE_ACTIVITY	226	487	69	69	0.3	0.25	1.12	1	1	1	0.238	0.486	0.849	0.943	2050	5747
PHOSPHORYLATION	257	488	189	189	0.27	0.24	1.09	1.03	1	1	0.206	0.384	0.891	0.932	4564	5617
PHOSPHOTRANSFERASE_ACTIVITY_ALCOHOL_GROUP_AS_ACCEPTOR	225	489	216	216	0.28	0.24	1.12	1.05	1	1	0.125	0.305	0.839	0.897	4611	3275
POLYSACCHARIDE_BINDING	772	490	21	21	0.17	0.24	0.55	0.8	1	1	0.986	0.785	0.996	0.997	5197	6015
PORE_COMPLEX	663	491	20	20	0.24	0.37	0.77	1.24	1	1	0.828	0.17	1	0.729	6535	4665
POSITIVE_REGULATION_OF_BIOLOGICAL_PROCESS	325	492	459	459	0.25	0.23	1.04	1.05	1	1	0.309	0.285	0.952	0.906	4448	4534
POSITIVE_REGULATION_OF_CASPASE_ACTIVITY	39	493	16	16	0.46	0.32	1.38	1.02	1	1	0.071	0.449	0.721	0.932	2491	4145
POSITIVE_REGULATION_OF_CATALYTIC_ACTIVITY	22	494	100	100	0.37	0.23	1.44	0.95	1	1	0.002	0.61	0.706	0.959	3057	4315
POSITIVE_REGULATION_OF_CELL_CYCLE	324	495	15	15	0.35	0.29	1.04	0.91	1	1	0.411	0.621	0.953	0.988	4895	1738
POSITIVE_REGULATION_OF_CELL_DIFFERENTIATION	447	496	19	19	0.3	0.26	0.94	0.85	1	1	0.59	0.717	1	0.997	3846	1163
POSITIVE_REGULATION_OF_CELL_PROLIFERATION	667	497	108	108	0.2	0.2	0.77	0.84	1	1	0.96	0.886	1	1	4183	5454
POSITIVE_REGULATION_OF_CELLULAR_COMPONENT_ORGANIZATION_AND_BIOGENESIS	694	498	20	20	0.23	0.3	0.73	1	1	1	0.859	0.491	1	0.942	4183	4171
POSITIVE_REGULATION_OF_CELLULAR_METABOLIC_PROCESS	341	499	134	134	0.26	0.23	1.03	0.97	1	1	0.409	0.583	0.975	0.942	2920	4645
POSITIVE_REGULATION_OF_CELLULAR_PROCESS	369	500	434	434	0.24	0.22	1	1.01	1	1	0.474	0.434	1	0.939	4619	4534
POSITIVE_REGULATION_OF_CELLULAR_PROTEIN_METABOLIC_PROCESS	427	501	47	47	0.27	0.25	0.95	0.98	1	1	0.598	0.524	1	0.937	4325	4041
POSITIVE_REGULATION_OF_CYTOKINE_BIOSYNTHETIC_PROCESS	610	502	16	16	0.27	0.27	0.82	0.86	1	1	0.764	0.672	1	0.99	4257	3778
POSITIVE_REGULATION_OF_DEVELOPMENTAL_PROCESS	235	503	154	154	0.28	0.22	1.11	0.93	1	1	0.176	0.719	0.848	0.984	4315	4241
POSITIVE_REGULATION_OF_HYDROLASE_ACTIVITY	119	504	31	31	0.37	0.24	1.23	0.88	1	1	0.147	0.664	0.739	0.988	2988	6123
POSITIVE_REGULATION_OF_I_KAPPAB_KINASE_NF_KAPPAB_CASCADE	269	505	56	56	0.3	0.3	1.09	1.19	1	1	0.318	0.156	0.885	0.768	4991	3052
POSITIVE_REGULATION_OF_IMMUNE_RESPONSE	154	506	19	19	0.38	0.45	1.18	1.46	1	1	0.23	0.036	0.83	0.742	2489	1196
POSITIVE_REGULATION_OF_IMMUNE_SYSTEM_PROCESS	575	507	35	35	0.25	0.25	0.85	0.91	1	1	0.759	0.628	1	0.979	4527	1196
POSITIVE_REGULATION_OF_LYMPHOCYTE_ACTIVATION		9	20	20	-0.26	0.22	-1.25	0.74	0.574	1	0.091	0.854	0.19	1	6874	4085
POSITIVE_REGULATION_OF_MAP_KINASE_ACTIVITY	373	508	29	29	0.3	0.28	1	0.99	1	1	0.48	0.512	1	0.931	5175	3759
POSITIVE_REGULATION_OF_METABOLIC_PROCESS	303	509	139	139	0.27	0.23	1.06	0.98	1	1	0.32	0.554	0.919	0.933	2920	4645
POSITIVE_REGULATION_OF_MULTICELLULAR_ORGANISMAL_PROCESS	467	510	45	45	0.26	0.25	0.93	0.96	1	1	0.636	0.574	1	0.959	4527	1196
POSITIVE_REGULATION_OF_NUCLEOBASENUCLEOSIDENUCLEOTIDE_AND_NUCLEIC_ACID_METABOLIC_PROCESS	286	511	88	88	0.28	0.24	1.07	1	1	1	0.3	0.515	0.898	0.943	3037	5545
POSITIVE_REGULATION_OF_PHOSPHATE_METABOLIC_PROCESS	420	512	18	18	0.31	0.3	0.96	0.98	1	1	0.531	0.526	1	0.936	3743	3664
POSITIVE_REGULATION_OF_PHOSPHORYLATION	243	513	16	16	0.37	0.38	1.11	1.21	1	1	0.308	0.196	0.858	0.739	3743	3664
POSITIVE_REGULATION_OF_PROTEIN_METABOLIC_PROCESS	451	514	49	49	0.26	0.25	0.94	0.99	1	1	0.611	0.486	1	0.94	4325	4041
POSITIVE_REGULATION_OF_PROTEIN_MODIFICATION_PROCESS	561	515	20	20	0.27	0.33	0.87	1.13	1	1	0.693	0.295	1	0.812	3743	3664
POSITIVE_REGULATION_OF_RESPONSE_TO_STIMULUS	144	516	26	26	0.36	0.4	1.19	1.4	1	1	0.185	0.054	0.825	0.901	4257	3186
POSITIVE_REGULATION_OF_RNA_METABOLIC_PROCESS	271	517	69	69	0.29	0.22	1.08	0.87	1	1	0.304	0.778	0.893	0.994	2834	5390
POSITIVE_REGULATION_OF_SIGNAL_TRANSDUCTION	338	518	76	76	0.27	0.33	1.03	1.33	1	1	0.417	0.032	0.978	0.86	4991	3052
POSITIVE_REGULATION_OF_T_CELL_ACTIVATION		10	18	18	-0.26	0.29	-1.09	0.94	0.882	1	0.281	0.559	0.393	0.972	6874	4085
POSITIVE_REGULATION_OF_TRANSCRIPTION	300	519	82	82	0.28	0.23	1.06	0.94	1	1	0.332	0.634	0.925	0.97	2920	5545
POSITIVE_REGULATION_OF_TRANSCRIPTION_FROM_RNA_POLYMERASE_II_PROMOTER	61	520	43	43	0.38	0.31	1.34	1.18	1	1	0.054	0.182	0.623	0.745	2834	4645
POSITIVE_REGULATION_OF_TRANSCRIPTIONDNA_DEPENDENT	272	521	69	69	0.29	0.22	1.08	0.88	1	1	0.278	0.748	0.89	0.989	2834	5390
POSITIVE_REGULATION_OF_TRANSFERASE_ACTIVITY	13	522	51	51	0.42	0.26	1.5	1.02	0.999	1	0.006	0.452	0.661	0.931	3184	1470
POSITIVE_REGULATION_OF_TRANSLATION	352	523	21	21	0.32	0.28	1.02	0.94	1	1	0.461	0.582	0.989	0.975	4257	3778
POST_TRANSLATIONAL_PROTEIN_MODIFICATION	207	524	278	278	0.28	0.22	1.13	0.97	1	1	0.074	0.626	0.842	0.95	4631	5617
POTASSIUM_CHANNEL_ACTIVITY	689	525	28	28	0.22	0.18	0.73	0.65	1	1	0.886	0.947	1	1	5523	3913
POTASSIUM_ION_TRANSPORT	718	526	35	35	0.2	0.18	0.69	0.68	1	1	0.939	0.948	1	1	4413	6814
PRIMARY_ACTIVE_TRANSMEMBRANE_TRANSPORTER_ACTIVITY	247	527	30	30	0.33	0.42	1.1	1.51	1	1	0.313	0.013	0.89	0.996	4929	3406
PROGRAMMED_CELL_DEATH	259	528	305	305	0.27	0.25	1.09	1.12	1	1	0.165	0.118	0.888	0.823	4407	4496
PROTEASE_INHIBITOR_ACTIVITY	483	529	21	21	0.29	0.22	0.92	0.76	1	1	0.63	0.85	1	1	5597	5930
PROTEASOME_COMPLEX	287	530	22	22	0.33	0.31	1.07	1.05	1	1	0.383	0.408	0.896	0.899	3790	5484
PROTEIN_AMINO_ACID_DEPHOSPHORYLATION	97	531	39	39	0.36	0.24	1.27	0.9	1	1	0.096	0.659	0.706	0.984	1929	6371
PROTEIN_AMINO_ACID_N_LINKED_GLYCOSYLATION	478	532	16	16	0.3	0.24	0.92	0.74	1	1	0.601	0.842	1	1	2806	6234
PROTEIN_AMINO_ACID_PHOSPHORYLATION	248	533	162	162	0.28	0.23	1.1	1.01	1	1	0.205	0.471	0.887	0.94	4564	5397
PROTEIN_BINDING_BRIDGING	455	534	38	38	0.27	0.36	0.94	1.34	1	1	0.622	0.059	1	0.893	4586	1857
PROTEIN_C_TERMINUS_BINDING	111	535	43	43	0.35	0.33	1.24	1.24	1	1	0.111	0.121	0.735	0.732	4778	4677
PROTEIN_CATABOLIC_PROCESS	170	536	42	42	0.33	0.32	1.16	1.21	1	1	0.215	0.143	0.851	0.757	2699	5331
PROTEIN_COMPLEX_ASSEMBLY	309	537	110	110	0.27	0.25	1.05	1.05	1	1	0.346	0.327	0.923	0.898	4212	4901
PROTEIN_COMPLEX_BINDING	386	538	30	30	0.29	0.28	0.98	1.01	1	1	0.526	0.467	1	0.94	4810	3792
PROTEIN_DIMERIZATION_ACTIVITY	172	539	115	115	0.3	0.28	1.16	1.19	1	1	0.13	0.114	0.859	0.761	5386	4526
PROTEIN_DNA_COMPLEX_ASSEMBLY	113	540	23	23	0.38	0.24	1.24	0.81	1	1	0.157	0.76	0.744	0.998	4829	2350
PROTEIN_DOMAIN_SPECIFIC_BINDING	122	541	42	42	0.35	0.25	1.23	0.95	1	1	0.127	0.581	0.746	0.96	3741	4199
PROTEIN_FOLDING	292	542	39	39	0.31	0.4	1.07	1.51	1	1	0.379	0.01	0.916	0.938	2910	3897
PROTEIN_HETERODIMERIZATION_ACTIVITY	330	543	53	53	0.29	0.27	1.04	1.04	1	1	0.428	0.421	0.952	0.923	5386	6123
PROTEIN_HOMODIMERIZATION_ACTIVITY	258	544	78	78	0.29	0.31	1.09	1.27	1	1	0.274	0.053	0.891	0.782	5358	4526
PROTEIN_IMPORT	28	545	33	33	0.41	0.24	1.4	0.87	1	1	0.033	0.712	0.801	0.99	3238	2008
PROTEIN_IMPORT_INTO_NUCLEUS	21	546	28	28	0.43	0.2	1.45	0.72	1	1	0.027	0.882	0.649	1	3024	2008
PROTEIN_KINASE_ACTIVITY	169	547	188	188	0.29	0.24	1.16	1.04	1	1	0.061	0.353	0.853	0.911	4564	3275
PROTEIN_KINASE_BINDING	641	548	44	44	0.22	0.34	0.8	1.28	1	1	0.844	0.087	1	0.81	5955	4263
PROTEIN_KINASE_CASCADE	77	549	179	179	0.32	0.24	1.3	1.06	1	1	0.008	0.309	0.664	0.894	3402	3759
PROTEIN_KINASE_INHIBITOR_ACTIVITY	17	550	19	19	0.48	0.39	1.48	1.29	1	1	0.028	0.125	0.604	0.82	1053	981
PROTEIN_KINASE_REGULATOR_ACTIVITY	75	551	27	27	0.39	0.3	1.31	1.06	1	1	0.069	0.37	0.65	0.892	1365	981
PROTEIN_LOCALIZATION	204	552	113	113	0.29	0.21	1.14	0.86	1	1	0.17	0.839	0.839	0.99	3238	3673
PROTEIN_MODIFICATION_BY_SMALL_PROTEIN_CONJUGATION	339	553	23	23	0.32	0.33	1.03	1.11	1	1	0.419	0.302	0.976	0.826	5506	2340
PROTEIN_MODIFICATION_PROCESS	290	554	358	358	0.26	0.21	1.07	0.94	1	1	0.207	0.744	0.905	0.972	4604	3976
PROTEIN_N_TERMINUS_BINDING	464	555	29	29	0.28	0.36	0.93	1.27	1	1	0.601	0.119	1	0.788	5094	3197
PROTEIN_OLIGOMERIZATION	596	556	23	23	0.26	0.35	0.84	1.22	1	1	0.756	0.168	1	0.741	5238	4526
PROTEIN_PROCESSING	220	557	22	22	0.35	0.42	1.12	1.42	1	1	0.289	0.051	0.848	0.814	4103	3045
PROTEIN_RNA_COMPLEX_ASSEMBLY	14	558	31	31	0.45	0.35	1.5	1.29	0.999	1	0.011	0.121	0.626	0.815	3329	4064
PROTEIN_SERINE_THREONINE_KINASE_ACTIVITY	174	559	128	128	0.29	0.22	1.16	0.92	1	1	0.116	0.724	0.86	0.981	4564	5617
PROTEIN_TARGETING	128	560	60	60	0.33	0.27	1.21	1.05	1	1	0.109	0.386	0.79	0.912	3238	3673
PROTEIN_TRANSPORT	249	561	87	87	0.29	0.24	1.1	1.01	1	1	0.246	0.476	0.884	0.94	3238	3673
PROTEIN_TYROSINE_KINASE_ACTIVITY	442	562	52	52	0.26	0.3	0.95	1.19	1	1	0.609	0.172	1	0.75	2767	2961
PROTEIN_TYROSINE_PHOSPHATASE_ACTIVITY	298	563	36	36	0.3	0.27	1.06	1.02	1	1	0.363	0.446	0.919	0.934	1929	5747
PROTEIN_UBIQUITINATION	319	564	22	22	0.32	0.33	1.04	1.13	1	1	0.401	0.307	0.958	0.815	5506	2340
PROTEINACEOUS_EXTRACELLULAR_MATRIX	754	565	60	60	0.17	0.25	0.63	0.99	1	1	0.993	0.508	1	0.931	7401	5013
PROTEOLYSIS	186	566	121	121	0.29	0.23	1.15	0.99	1	1	0.128	0.53	0.859	0.934	4429	4416
PURINE_NUCLEOTIDE_BINDING	176	567	121	121	0.3	0.22	1.16	0.94	1	1	0.121	0.659	0.854	0.971	3075	5931
PURINE_RIBONUCLEOTIDE_BINDING	158	568	120	120	0.3	0.23	1.18	0.96	1	1	0.098	0.601	0.829	0.957	3075	5931
PYROPHOSPHATASE_ACTIVITY	491	569	149	149	0.23	0.28	0.91	1.19	1	1	0.755	0.072	1	0.747	5098	3452
RAS_PROTEIN_SIGNAL_TRANSDUCTION	270	570	44	44	0.31	0.31	1.08	1.19	1	1	0.307	0.156	0.885	0.77	2742	3933
RECEPTOR_ACTIVITY	402	571	352	352	0.24	0.18	0.97	0.83	1	1	0.605	0.971	1	1	4297	4792
RECEPTOR_BINDING	344	572	235	235	0.25	0.24	1.02	1.06	1	1	0.39	0.269	0.979	0.903	4440	4283
RECEPTOR_COMPLEX	572	573	36	36	0.25	0.34	0.86	1.25	1	1	0.754	0.118	1	0.792	4861	3729
RECEPTOR_MEDIATED_ENDOCYTOSIS	507	574	24	24	0.28	0.26	0.9	0.88	1	1	0.66	0.668	1	0.988	5521	3118
RECEPTOR_SIGNALING_PROTEIN_ACTIVITY	5	575	54	54	0.43	0.19	1.55	0.76	0.997	1	0.001	0.901	1	1	2626	6559
RECEPTOR_SIGNALING_PROTEIN_SERINE_THREONINE_KINASE_ACTIVITY	1	576	23	23	0.56	0.22	1.8	0.73	0.23	1	0.001	0.868	0.254	1	2537	6026
REGULATION_OF_ANGIOGENESIS	410	577	21	21	0.3	0.34	0.97	1.16	1	1	0.554	0.244	1	0.757	3459	2157
REGULATION_OF_APOPTOSIS	192	578	243	243	0.28	0.23	1.15	1.02	1	1	0.086	0.438	0.845	0.931	4737	4496
REGULATION_OF_BINDING	157	579	33	33	0.34	0.45	1.18	1.62	1	0.965	0.205	0.002	0.834	1	1374	2413
REGULATION_OF_BIOLOGICAL_QUALITY	535	580	264	264	0.22	0.18	0.89	0.79	1	1	0.87	0.986	1	1	4585	6577
REGULATION_OF_BLOOD_PRESSURE	417	581	16	16	0.32	0.25	0.96	0.79	1	1	0.546	0.782	1	1	1448	6514
REGULATION_OF_BODY_FLUID_LEVELS	638	582	47	47	0.22	0.16	0.8	0.62	1	1	0.844	0.987	1	0.998	5277	7140
REGULATION_OF_CATALYTIC_ACTIVITY	26	583	167	167	0.36	0.22	1.43	0.97	1	1	0	0.584	0.684	0.942	3229	4585
REGULATION_OF_CELL_ADHESION	734	584	27	27	0.21	0.28	0.68	1	1	1	0.944	0.455	1	0.939	4527	1931
REGULATION_OF_CELL_CYCLE	337	585	125	125	0.26	0.29	1.03	1.24	1	1	0.413	0.049	0.975	0.711	5058	3312
REGULATION_OF_CELL_DIFFERENTIATION	541	586	39	39	0.25	0.26	0.88	0.99	1	1	0.717	0.521	1	0.933	3178	4211
REGULATION_OF_CELL_GROWTH	221	587	27	27	0.34	0.29	1.12	1.02	1	1	0.287	0.447	0.848	0.931	4428	981
REGULATION_OF_CELL_MIGRATION	331	588	19	19	0.33	0.28	1.04	0.91	1	1	0.429	0.613	0.95	0.978	3760	1941
REGULATION_OF_CELL_PROLIFERATION	380	589	209	209	0.24	0.23	0.99	0.99	1	1	0.524	0.536	1	0.935	4581	4516
REGULATION_OF_CELLULAR_COMPONENT_ORGANIZATION_AND_BIOGENESIS	509	590	67	67	0.24	0.31	0.9	1.24	1	1	0.705	0.092	1	0.716	4288	4273
REGULATION_OF_CELLULAR_METABOLIC_PROCESS	163	591	456	456	0.28	0.24	1.17	1.08	1	1	0.016	0.137	0.822	0.874	4516	3696
REGULATION_OF_CELLULAR_PROTEIN_METABOLIC_PROCESS	142	592	99	99	0.31	0.25	1.19	1.03	1	1	0.084	0.418	0.82	0.929	4325	4064
REGULATION_OF_CYCLIN_DEPENDENT_PROTEIN_KINASE_ACTIVITY	52	593	34	34	0.39	0.31	1.36	1.14	1	1	0.058	0.267	0.63	0.787	2240	4737
REGULATION_OF_CYTOKINE_BIOSYNTHETIC_PROCESS	317	594	24	24	0.32	0.24	1.04	0.84	1	1	0.418	0.744	0.954	1	4257	3848
REGULATION_OF_CYTOKINE_PRODUCTION	673	595	19	19	0.24	0.18	0.76	0.6	1	1	0.845	0.963	1	1	3365	5716
REGULATION_OF_CYTOSKELETON_ORGANIZATION_AND_BIOGENESIS	623	596	18	18	0.26	0.28	0.81	0.93	1	1	0.753	0.573	1	0.979	2334	3312
REGULATION_OF_DEVELOPMENTAL_PROCESS	212	597	297	297	0.27	0.23	1.13	1.04	1	1	0.082	0.344	0.85	0.915	4315	4260
REGULATION_OF_DNA_BINDING	178	598	26	26	0.35	0.44	1.15	1.55	1	1	0.229	0.011	0.864	1	786	1850
REGULATION_OF_DNA_METABOLIC_PROCESS	430	599	32	32	0.28	0.29	0.95	1.05	1	1	0.558	0.395	1	0.896	4842	5500
REGULATION_OF_DNA_REPLICATION	628	600	15	15	0.27	0.35	0.81	1.1	1	1	0.755	0.328	1	0.855	3229	5454
REGULATION_OF_GENE_EXPRESSION	183	601	384	384	0.28	0.24	1.15	1.09	1	1	0.04	0.145	0.866	0.871	4516	4262
REGULATION_OF_GENE_EXPRESSION_EPIGENETIC	406	602	18	18	0.32	0.26	0.97	0.86	1	1	0.539	0.689	1	0.993	3000	5129
REGULATION_OF_GROWTH	140	603	34	34	0.35	0.27	1.2	0.97	1	1	0.17	0.558	0.821	0.943	4428	1209
REGULATION_OF_HEART_CONTRACTION	515	604	15	15	0.3	0.21	0.9	0.64	1	1	0.63	0.934	1	1	5180	3598
REGULATION_OF_HYDROLASE_ACTIVITY	74	605	44	44	0.37	0.22	1.31	0.83	1	1	0.043	0.807	0.644	1	2988	6123
REGULATION_OF_I_KAPPAB_KINASE_NF_KAPPAB_CASCADE	187	606	60	60	0.31	0.29	1.15	1.13	1	1	0.182	0.234	0.855	0.81	3743	3052
REGULATION_OF_IMMUNE_RESPONSE	203	607	21	21	0.36	0.41	1.14	1.37	1	1	0.272	0.061	0.841	0.888	2834	1196
REGULATION_OF_IMMUNE_SYSTEM_PROCESS	471	608	43	43	0.26	0.23	0.92	0.89	1	1	0.636	0.706	1	0.99	4527	1196
REGULATION_OF_INTRACELLULAR_TRANSPORT	314	609	18	18	0.34	0.31	1.05	1	1	1	0.401	0.472	0.938	0.944	2056	2560
REGULATION_OF_KINASE_ACTIVITY	29	610	100	100	0.36	0.24	1.4	1	1	1	0.004	0.501	0.791	0.94	3229	4737
REGULATION_OF_LYMPHOCYTE_ACTIVATION		5	26	26	-0.26	0.21	-1.44	0.75	0.208	1	0	0.869	0.163	1	6874	6695
REGULATION_OF_MAP_KINASE_ACTIVITY	276	611	40	40	0.31	0.26	1.08	0.99	1	1	0.353	0.501	0.909	0.932	5175	1470
REGULATION_OF_METABOLIC_PROCESS	173	612	464	464	0.28	0.24	1.16	1.11	1	1	0.018	0.1	0.856	0.828	4516	4263
REGULATION_OF_MITOSIS	744	613	30	30	0.19	0.24	0.66	0.85	1	1	0.949	0.732	1	0.998	5955	6658
REGULATION_OF_MOLECULAR_FUNCTION	35	614	193	193	0.34	0.23	1.38	1.02	1	1	0	0.412	0.756	0.936	3229	4315
REGULATION_OF_MULTICELLULAR_ORGANISMAL_PROCESS	422	615	98	98	0.25	0.17	0.96	0.73	1	1	0.603	0.97	1	1	4527	5716
REGULATION_OF_MYELOID_CELL_DIFFERENTIATION	646	616	15	15	0.27	0.36	0.79	1.12	1	1	0.792	0.295	1	0.818	6458	631
REGULATION_OF_NUCLEOBASENUCLEOSIDENUCLEOTIDE_AND_NUCLEIC_ACID_METABOLIC_PROCESS	199	617	352	352	0.28	0.26	1.14	1.17	1	1	0.05	0.034	0.846	0.754	4516	3696
REGULATION_OF_NUCLEOCYTOPLASMIC_TRANSPORT	175	618	15	15	0.39	0.33	1.16	1.03	1	1	0.258	0.43	0.857	0.936	2056	1941
REGULATION_OF_ORGANELLE_ORGANIZATION_AND_BIOGENESIS	477	619	25	25	0.28	0.3	0.92	1.06	1	1	0.637	0.373	1	0.897	944	2851
REGULATION_OF_PHOSPHORYLATION	279	620	35	35	0.31	0.3	1.08	1.11	1	1	0.35	0.3	0.902	0.832	4137	3969
REGULATION_OF_PROGRAMMED_CELL_DEATH	182	621	243	243	0.28	0.23	1.15	1.01	1	1	0.081	0.449	0.866	0.941	4737	4496
REGULATION_OF_PROTEIN_AMINO_ACID_PHOSPHORYLATION	161	622	18	18	0.38	0.29	1.17	0.94	1	1	0.23	0.557	0.831	0.974	2872	5336
REGULATION_OF_PROTEIN_KINASE_ACTIVITY	48	623	99	99	0.36	0.25	1.37	1.02	1	1	0.004	0.441	0.628	0.931	3229	4737
REGULATION_OF_PROTEIN_METABOLIC_PROCESS	185	624	107	107	0.3	0.26	1.15	1.09	1	1	0.148	0.277	0.861	0.882	4325	4064
REGULATION_OF_PROTEIN_MODIFICATION_PROCESS	316	625	29	29	0.31	0.26	1.05	0.92	1	1	0.391	0.626	0.945	0.981	3743	5336
REGULATION_OF_RESPONSE_TO_STIMULUS	69	626	35	35	0.39	0.3	1.32	1.09	1	1	0.059	0.306	0.642	0.872	4257	3186
REGULATION_OF_RNA_METABOLIC_PROCESS	206	627	268	268	0.28	0.26	1.14	1.16	1	1	0.085	0.053	0.841	0.764	4379	4262
REGULATION_OF_SECRETION	550	628	21	21	0.27	0.22	0.88	0.75	1	1	0.689	0.84	1	1	6078	5657
REGULATION_OF_SIGNAL_TRANSDUCTION	398	629	132	132	0.25	0.27	0.98	1.17	1	1	0.558	0.106	1	0.756	3402	3052
REGULATION_OF_T_CELL_ACTIVATION		8	21	21	-0.26	0.24	-1.26	0.8	0.535	1	0.071	0.786	0.206	0.997	6874	4085
REGULATION_OF_TRANSCRIPTION	202	630	323	323	0.28	0.26	1.14	1.18	1	1	0.063	0.037	0.845	0.745	4516	3696
REGULATION_OF_TRANSCRIPTION_FACTOR_ACTIVITY	360	631	20	20	0.32	0.41	1.01	1.37	1	1	0.46	0.073	0.986	0.909	786	2904
REGULATION_OF_TRANSCRIPTION_FROM_RNA_POLYMERASE_II_PROMOTER	132	632	170	170	0.3	0.31	1.21	1.33	1	1	0.046	0.005	0.781	0.829	4257	3311
REGULATION_OF_TRANSCRIPTIONDNA_DEPENDENT	209	633	266	266	0.28	0.26	1.13	1.18	1	1	0.095	0.046	0.849	0.75	4379	4262
REGULATION_OF_TRANSFERASE_ACTIVITY	41	634	101	101	0.36	0.23	1.37	0.99	1	1	0.007	0.534	0.697	0.933	3229	4737
REGULATION_OF_TRANSLATION	136	635	51	51	0.33	0.25	1.21	0.99	1	1	0.123	0.497	0.775	0.936	4288	3848
REGULATION_OF_TRANSPORT	606	636	41	41	0.23	0.3	0.83	1.14	1	1	0.804	0.241	1	0.782	2195	2560
REPLICATION_FORK	151	637	15	15	0.4	0.22	1.19	0.69	1	1	0.237	0.884	0.811	0.997	3512	5959
REPRODUCTION	265	638	151	151	0.27	0.21	1.09	0.9	1	1	0.228	0.795	0.889	0.985	3339	4880
REPRODUCTIVE_PROCESS	289	639	97	97	0.28	0.2	1.07	0.82	1	1	0.316	0.88	0.902	1	3339	5538
RESPONSE_TO_ABIOTIC_STIMULUS	529	640	51	51	0.25	0.18	0.89	0.72	1	1	0.704	0.931	1	1	4665	6128
RESPONSE_TO_BIOTIC_STIMULUS	440	641	69	69	0.25	0.26	0.95	1.06	1	1	0.625	0.36	1	0.905	3314	4356
RESPONSE_TO_CHEMICAL_STIMULUS	643	642	190	190	0.2	0.27	0.8	1.19	1	1	0.968	0.06	1	0.761	6377	4315
RESPONSE_TO_DNA_DAMAGE_STIMULUS	126	643	97	97	0.32	0.28	1.22	1.16	1	1	0.059	0.144	0.759	0.764	3749	4560
RESPONSE_TO_DRUG	758	644	15	15	0.21	0.42	0.62	1.3	1	1	0.926	0.128	0.998	0.799	6219	3784
RESPONSE_TO_ENDOGENOUS_STIMULUS	145	645	120	120	0.3	0.27	1.19	1.15	1	1	0.086	0.143	0.83	0.757	4132	4560
RESPONSE_TO_EXTERNAL_STIMULUS	419	646	217	217	0.24	0.17	0.96	0.77	1	1	0.645	0.986	1	1	4951	4906
RESPONSE_TO_EXTRACELLULAR_STIMULUS	400	647	24	24	0.3	0.27	0.98	0.93	1	1	0.536	0.586	1	0.987	5133	5068
RESPONSE_TO_HORMONE_STIMULUS	214	648	22	22	0.36	0.3	1.13	1.03	1	1	0.284	0.446	0.85	0.929	1545	4315
RESPONSE_TO_HYPOXIA	72	649	20	20	0.42	0.38	1.31	1.25	1	1	0.107	0.152	0.645	0.789	4440	600
RESPONSE_TO_LIGHT_STIMULUS	626	650	29	29	0.24	0.23	0.81	0.82	1	1	0.801	0.769	1	0.997	4898	6128
RESPONSE_TO_NUTRIENT	723	651	15	15	0.23	0.21	0.68	0.65	1	1	0.905	0.898	1	1	6123	5532
RESPONSE_TO_NUTRIENT_LEVELS	538	652	22	22	0.28	0.24	0.89	0.83	1	1	0.678	0.762	1	1	5133	5068
RESPONSE_TO_ORGANIC_SUBSTANCE	230	653	18	18	0.35	0.32	1.12	1.03	1	1	0.308	0.45	0.844	0.933	2758	3875
RESPONSE_TO_OTHER_ORGANISM	522	654	46	46	0.25	0.17	0.89	0.67	1	1	0.694	0.968	1	1	4226	4356
RESPONSE_TO_OXIDATIVE_STRESS	672	655	29	29	0.23	0.21	0.76	0.74	1	1	0.868	0.876	1	1	3730	3382
RESPONSE_TO_RADIATION	625	656	34	34	0.24	0.21	0.81	0.79	1	1	0.796	0.819	1	1	4898	6128
RESPONSE_TO_STRESS	168	657	321	321	0.28	0.25	1.17	1.14	1	1	0.041	0.074	0.835	0.772	4573	3624
RESPONSE_TO_UV	676	658	16	16	0.25	0.27	0.75	0.87	1	1	0.843	0.653	1	0.99	6088	4532
RESPONSE_TO_VIRUS	160	659	31	31	0.35	0.21	1.17	0.75	1	1	0.192	0.881	0.831	1	2434	6182
RESPONSE_TO_WOUNDING	418	660	133	133	0.24	0.18	0.96	0.76	1	1	0.606	0.967	1	1	2761	4880
RHO_PROTEIN_SIGNAL_TRANSDUCTION	238	661	25	25	0.34	0.39	1.11	1.35	1	1	0.307	0.059	0.858	0.908	2742	3331
RHODOPSIN_LIKE_RECEPTOR_ACTIVITY	573	662	80	80	0.23	-0.15	0.86		1	0	0.834		1	1	5403	7907
RHYTHMIC_PROCESS	679	663	23	23	0.23	0.33	0.75	1.12	1	1	0.861	0.285	1	0.812	4088	2998
RIBONUCLEOPROTEIN_COMPLEX	250	664	85	85	0.29	0.25	1.1	1.03	1	1	0.255	0.424	0.884	0.936	3785	5566
RIBONUCLEOPROTEIN_COMPLEX_BIOGENESIS_AND_ASSEMBLY	37	665	36	36	0.39	0.34	1.38	1.25	1	1	0.04	0.129	0.736	0.784	3329	4064
RIBOSOMAL_SUBUNIT	481	666	16	16	0.31	0.18	0.92	0.55	1	1	0.608	0.98	1	0.999	1638	7160
RIBOSOME	346	667	29	29	0.31	0.25	1.02	0.9	1	1	0.442	0.651	0.98	0.991	2863	5798
RNA_BINDING	299	668	146	146	0.27	0.26	1.06	1.11	1	1	0.304	0.2	0.916	0.843	4540	5298
RNA_BIOSYNTHETIC_PROCESS	90	669	384	384	0.31	0.27	1.28	1.25	1	1	0	0.006	0.677	0.776	4352	3719
RNA_METABOLIC_PROCESS	79	670	482	482	0.31	0.27	1.3	1.25	1	1	0.001	0	0.661	0.766	4021	3719
RNA_POLYMERASE_II_TRANSCRIPTION_FACTOR_ACTIVITY	33	671	112	112	0.36	0.3	1.39	1.28	1	1	0.006	0.033	0.743	0.821	3777	3712
RNA_PROCESSING	51	672	84	84	0.36	0.32	1.36	1.33	1	1	0.016	0.026	0.625	0.879	3246	4156
RNA_SPLICING	139	673	41	41	0.34	0.37	1.2	1.42	1	1	0.163	0.018	0.805	0.808	3978	4091
RUFFLE	416	674	19	19	0.3	0.39	0.96	1.3	1	1	0.541	0.123	1	0.822	5839	2636
SECOND_MESSENGER_MEDIATED_SIGNALING	354	675	107	107	0.26	0.16	1.02	0.65	1	1	0.439	0.997	0.987	1	3404	6439
SECONDARY_ACTIVE_TRANSMEMBRANE_TRANSPORTER_ACTIVITY	514	676	23	23	0.28	0.23	0.9	0.79	1	1	0.637	0.811	1	1	4585	3234
SECONDARY_METABOLIC_PROCESS	761	677	17	17	0.19	0.32	0.6	1.04	1	1	0.955	0.418	1	0.914	6965	4259
SECRETION	546	678	97	97	0.23	0.23	0.88	0.97	1	1	0.804	0.568	1	0.944	6078	4966
SECRETION_BY_CELL	595	679	55	55	0.23	0.25	0.84	0.98	1	1	0.816	0.546	1	0.94	6027	5230
SECRETORY_PATHWAY	519	680	41	41	0.26	0.28	0.89	1.06	1	1	0.703	0.377	1	0.898	6027	5230
SENSORY_PERCEPTION	634	681	100	100	0.21	0.23	0.8	0.97	1	1	0.928	0.567	1	0.941	5910	6008
SEQUENCE_SPECIFIC_DNA_BINDING	387	682	36	36	0.28	0.26	0.98	0.98	1	1	0.5	0.527	1	0.94	4347	5224
SERINE_HYDROLASE_ACTIVITY	589	683	34	34	0.25	0.23	0.84	0.83	1	1	0.78	0.771	1	1	3956	6278
SERINE_TYPE_ENDOPEPTIDASE_ACTIVITY	608	684	29	29	0.25	0.26	0.83	0.95	1	1	0.766	0.557	1	0.958	4387	6108
SERINE_TYPE_PEPTIDASE_ACTIVITY	580	685	33	33	0.25	0.23	0.85	0.82	1	1	0.758	0.794	1	1	3956	6278
SEXUAL_REPRODUCTION	312	686	73	73	0.28	0.23	1.05	0.94	1	1	0.364	0.634	0.925	0.97	2878	4548
SH3_SH2_ADAPTOR_ACTIVITY	544	687	25	25	0.26	0.31	0.88	1.07	1	1	0.672	0.38	1	0.896	4008	2303
SINGLE_STRANDED_DNA_BINDING	19	688	26	26	0.45	0.33	1.47	1.15	1	1	0.021	0.259	0.622	0.755	1942	4893
SKELETAL_DEVELOPMENT	732	689	71	71	0.18	0.24	0.68	0.95	1	1	0.984	0.605	1	0.959	4554	5013
SKELETAL_MUSCLE_DEVELOPMENT	389	690	25	25	0.3	0.36	0.98	1.25	1	1	0.523	0.136	1	0.781	4070	1856
SMALL_CONJUGATING_PROTEIN_LIGASE_ACTIVITY	57	691	28	28	0.4	0.35	1.35	1.24	1	1	0.073	0.142	0.599	0.737	2595	2272
SMALL_GTPASE_BINDING	611	692	15	15	0.28	0.52	0.82	1.62	1	0.971	0.752	0.014	1	1	3985	1924
SMALL_GTPASE_MEDIATED_SIGNAL_TRANSDUCTION	218	693	56	56	0.31	0.32	1.12	1.26	1	1	0.255	0.081	0.854	0.8	4012	3933
SMALL_GTPASE_REGULATOR_ACTIVITY	388	694	32	32	0.29	0.36	0.98	1.32	1	1	0.513	0.089	1	0.785	4146	2603
SMALL_PROTEIN_CONJUGATING_ENZYME_ACTIVITY	66	695	27	27	0.4	0.37	1.33	1.32	1	1	0.072	0.089	0.625	0.771	2595	2272
SOLUBLE_FRACTION	313	696	106	106	0.27	0.29	1.05	1.21	1	1	0.35	0.075	0.93	0.748	3284	5437
SPECIFIC_RNA_POLYMERASE_II_TRANSCRIPTION_FACTOR_ACTIVITY	103	697	20	20	0.4	0.34	1.26	1.14	1	1	0.142	0.268	0.711	0.782	5015	2888
SPHINGOLIPID_METABOLIC_PROCESS	652	698	20	20	0.25	0.26	0.79	0.88	1	1	0.818	0.688	1	0.988	2609	6519
SPINDLE	36	699	27	27	0.42	0.27	1.38	0.94	1	1	0.042	0.58	0.738	0.968	3534	4036
SPLICEOSOME	306	700	27	27	0.32	0.33	1.06	1.16	1	1	0.39	0.229	0.916	0.766	3395	4091
STEROID_BINDING	755	701	16	16	0.21	0.3	0.63	0.98	1	1	0.945	0.499	1	0.935	4985	3698
STEROID_BIOSYNTHETIC_PROCESS	82	702	18	18	0.42	0.25	1.29	0.81	1	1	0.12	0.778	0.68	0.998	3847	5655
STEROID_METABOLIC_PROCESS	690	703	42	42	0.21	0.24	0.73	0.9	1	1	0.913	0.677	1	0.988	4589	5662
STRESS_ACTIVATED_PROTEIN_KINASE_SIGNALING_PATHWAY	98	704	27	27	0.38	0.45	1.26	1.58	1	0.993	0.135	0.008	0.701	1	3057	3045
STRIATED_MUSCLE_DEVELOPMENT	332	705	28	28	0.31	0.3	1.04	1.06	1	1	0.431	0.361	0.955	0.903	2872	2306
STRUCTURAL_CONSTITUENT_OF_CYTOSKELETON	660	706	25	25	0.24	0.39	0.78	1.37	1	1	0.83	0.078	1	0.888	3448	1925
STRUCTURAL_CONSTITUENT_OF_MUSCLE	720	707	19	19	0.22	0.39	0.69	1.29	1	1	0.915	0.135	1	0.824	5227	4956
STRUCTURAL_CONSTITUENT_OF_RIBOSOME	222	708	55	55	0.31	0.27	1.12	1.06	1	1	0.236	0.358	0.846	0.898	5196	5798
STRUCTURAL_MOLECULE_ACTIVITY	525	709	141	141	0.23	0.24	0.89	1.02	1	1	0.806	0.432	1	0.928	5609	5137
STRUCTURE_SPECIFIC_DNA_BINDING	76	710	42	42	0.37	0.33	1.31	1.26	1	1	0.068	0.091	0.656	0.805	1942	4893
SUBSTRATE_SPECIFIC_CHANNEL_ACTIVITY	701	711	79	79	0.19	0.15	0.71	0.63	1	1	0.963	0.993	1	1	5565	5830
SUBSTRATE_SPECIFIC_TRANSMEMBRANE_TRANSPORTER_ACTIVITY	482	712	194	194	0.23	0.23	0.92	1.01	1	1	0.768	0.453	1	0.939	4585	4341
SUBSTRATE_SPECIFIC_TRANSPORTER_ACTIVITY	499	713	224	224	0.22	0.22	0.91	0.96	1	1	0.801	0.628	1	0.953	4794	4341
SUGAR_BINDING	728	714	16	16	0.23	0.38	0.68	1.2	1	1	0.902	0.213	1	0.767	5847	3025
SULFUR_METABOLIC_PROCESS	612	715	16	16	0.27	0.32	0.82	1	1	1	0.735	0.468	1	0.939	2134	4709
SYMPORTER_ACTIVITY	458	716	16	16	0.31	0.24	0.94	0.75	1	1	0.59	0.825	1	1	2203	1527
SYNAPSE	134	717	16	16	0.41	0.26	1.21	0.83	1	1	0.193	0.735	0.775	1	2966	5316
SYNAPTIC_TRANSMISSION	753	718	97	97	0.16	0.18	0.63	0.74	1	1	0.997	0.962	1	1	6476	5778
SYSTEM_PROCESS	707	719	327	327	0.17	0.19	0.71	0.87	1	1	1	0.926	1	0.99	5207	5872
T_CELL_ACTIVATION		6	29	29	-0.26	0.19	-1.37	0.67	0.338	1	0	0.933	0.186	1	6874	6586
TISSUE_DEVELOPMENT	453	720	86	86	0.25	0.18	0.94	0.74	1	1	0.642	0.966	1	1	2728	5763
TISSUE_REMODELING	752	721	19	19	0.2	0.18	0.63	0.58	1	1	0.958	0.964	1	1	2303	6957
TRANSCRIPTION	96	722	447	447	0.3	0.28	1.27	1.26	1	1	0	0.001	0.712	0.811	4352	3719
TRANSCRIPTION_ACTIVATOR_ACTIVITY	81	723	105	105	0.33	0.32	1.29	1.33	1	1	0.019	0.013	0.67	0.862	3037	3269
TRANSCRIPTION_COACTIVATOR_ACTIVITY	38	724	77	77	0.36	0.37	1.38	1.51	1	1	0.013	0.003	0.732	0.861	5170	2629
TRANSCRIPTION_COFACTOR_ACTIVITY	95	725	140	140	0.32	0.35	1.27	1.51	1	1	0.016	0	0.716	1	2689	2837
TRANSCRIPTION_COREPRESSOR_ACTIVITY	31	726	61	61	0.38	0.36	1.4	1.42	1	1	0.013	0.014	0.743	0.836	2478	3548
TRANSCRIPTION_DNA_DEPENDENT	92	727	383	383	0.31	0.28	1.27	1.26	1	1	0.001	0.005	0.691	0.786	4352	3719
TRANSCRIPTION_FACTOR_ACTIVITY	208	728	220	220	0.28	0.25	1.13	1.09	1	1	0.104	0.207	0.841	0.872	3316	5860
TRANSCRIPTION_FACTOR_BINDING	89	729	188	188	0.32	0.34	1.28	1.5	1	1	0.006	0	0.675	0.804	2776	2837
TRANSCRIPTION_FACTOR_COMPLEX	16	730	53	53	0.42	0.38	1.49	1.46	0.999	1	0.003	0.007	0.584	0.783	4124	2306
TRANSCRIPTION_FROM_RNA_POLYMERASE_II_PROMOTER	64	731	283	283	0.33	0.3	1.34	1.36	1	1	0.001	0	0.606	0.904	3339	3719
TRANSCRIPTION_REPRESSOR_ACTIVITY	18	732	88	88	0.39	0.36	1.48	1.46	1	1	0.001	0.002	0.605	0.817	2689	3548
TRANSFERASE_ACTIVITY_TRANSFERRING_ACYL_GROUPS	295	733	28	28	0.31	0.37	1.06	1.31	1	1	0.368	0.099	0.913	0.791	5570	4336
TRANSFERASE_ACTIVITY_TRANSFERRING_ALKYL_OR_ARYLOTHER_THAN_METHYLGROUPS	668	734	22	22	0.24	0.26	0.77	0.89	1	1	0.837	0.66	1	0.984	3276	1887
TRANSFERASE_ACTIVITY_TRANSFERRING_GLYCOSYL_GROUPS	381	735	59	59	0.27	0.21	0.99	0.85	1	1	0.515	0.799	1	0.996	4658	6535
TRANSFERASE_ACTIVITY_TRANSFERRING_GROUPS_OTHER_THAN_AMINO_ACYL_GROUPS	216	736	22	22	0.35	0.39	1.13	1.33	1	1	0.302	0.096	0.855	0.886	5393	4169
TRANSFERASE_ACTIVITY_TRANSFERRING_HEXOSYL_GROUPS	666	737	40	40	0.22	0.23	0.77	0.86	1	1	0.878	0.744	1	0.993	5402	6535
TRANSFERASE_ACTIVITY_TRANSFERRING_ONE_CARBON_GROUPS	503	738	25	25	0.27	0.35	0.91	1.22	1	1	0.637	0.175	1	0.733	5246	3833
TRANSFERASE_ACTIVITY_TRANSFERRING_PHOSPHORUS_CONTAINING_GROUPS	260	739	278	278	0.27	0.23	1.09	1.02	1	1	0.19	0.392	0.892	0.93	4611	4240
TRANSFORMING_GROWTH_FACTOR_BETA_RECEPTOR_SIGNALING_PATHWAY	649	740	31	31	0.23	0.28	0.79	1.01	1	1	0.844	0.474	1	0.939	5153	3040
TRANSITION_METAL_ION_BINDING	403	741	74	74	0.26	0.23	0.97	0.92	1	1	0.569	0.658	1	0.98	5179	2674
TRANSLATION	240	742	107	107	0.29	0.27	1.11	1.13	1	1	0.23	0.182	0.858	0.805	4528	3848
TRANSLATION_FACTOR_ACTIVITY_NUCLEIC_ACID_BINDING	273	743	18	18	0.34	0.3	1.08	0.97	1	1	0.375	0.502	0.89	0.941	3335	5836
TRANSLATION_REGULATOR_ACTIVITY	197	744	19	19	0.37	0.26	1.14	0.87	1	1	0.275	0.691	0.847	0.99	3335	5836
TRANSLATIONAL_INITIATION	42	745	17	17	0.45	0.42	1.37	1.34	1	1	0.071	0.102	0.689	0.91	3329	4064
TRANSMEMBRANE_RECEPTOR_ACTIVITY	552	746	252	252	0.21	0.15	0.87	0.66	1	1	0.905	1	1	1	4522	6205
TRANSMEMBRANE_RECEPTOR_PROTEIN_KINASE_ACTIVITY	378	747	46	46	0.28	0.3	0.99	1.15	1	1	0.511	0.224	1	0.76	2767	2994
TRANSMEMBRANE_RECEPTOR_PROTEIN_PHOSPHATASE_ACTIVITY	682	748	15	15	0.25	0.25	0.74	0.8	1	1	0.857	0.765	1	0.999	3908	5747
TRANSMEMBRANE_RECEPTOR_PROTEIN_SERINE_THREONINE_KINASE_SIGNALING_PATHWAY	603	749	38	38	0.24	0.33	0.83	1.24	1	1	0.81	0.119	1	0.721	5995	3453
TRANSMEMBRANE_RECEPTOR_PROTEIN_TYROSINE_KINASE_ACTIVITY	593	750	39	39	0.24	0.31	0.84	1.15	1	1	0.781	0.245	1	0.764	2767	4240
TRANSMEMBRANE_RECEPTOR_PROTEIN_TYROSINE_KINASE_SIGNALING_PATHWAY	255	751	57	57	0.3	0.34	1.09	1.32	1	1	0.289	0.041	0.882	0.796	3711	3804
TRANSMEMBRANE_TRANSPORTER_ACTIVITY	549	752	214	214	0.22	0.24	0.88	1.06	1	1	0.868	0.273	1	0.895	4794	4341
TRANSMISSION_OF_NERVE_IMPULSE	747	753	108	108	0.17	0.15	0.65	0.63	1	1	0.995	0.994	1	0.997	6476	5819
TRANSPORT	542	754	466	466	0.21	0.23	0.88	1.07	1	1	0.939	0.196	1	0.889	4338	4175
TUBULIN_BINDING	58	755	27	27	0.41	0.32	1.35	1.12	1	1	0.061	0.299	0.595	0.813	944	4175
UBIQUITIN_CYCLE	253	756	28	28	0.33	0.25	1.09	0.87	1	1	0.327	0.695	0.888	0.994	5506	5500
UBIQUITIN_LIGASE_COMPLEX	304	757	16	16	0.35	0.36	1.06	1.15	1	1	0.393	0.271	0.916	0.77	4407	4212
UBIQUITIN_PROTEIN_LIGASE_ACTIVITY	56	758	26	26	0.41	0.38	1.35	1.33	1	1	0.053	0.095	0.605	0.844	2595	2272
UDP_GLYCOSYLTRANSFERASE_ACTIVITY	434	759	19	19	0.3	0.26	0.95	0.86	1	1	0.568	0.687	1	0.988	3297	3627
UNFOLDED_PROTEIN_BINDING	60	760	32	32	0.39	0.28	1.35	1.01	1	1	0.065	0.452	0.603	0.939	2923	3267
VACUOLE	296	761	42	42	0.3	0.25	1.06	0.93	1	1	0.374	0.627	0.913	0.986	4029	3128
VASCULATURE_DEVELOPMENT	512	762	39	39	0.26	0.3	0.9	1.1	1	1	0.687	0.32	1	0.858	3760	4172
VESICLE	642	763	69	69	0.22	0.26	0.8	1.07	1	1	0.891	0.327	1	0.902	4679	5598
VESICLE_MEDIATED_TRANSPORT	448	764	114	114	0.24	0.26	0.94	1.1	1	1	0.665	0.228	1	0.834	2707	4452
VESICLE_MEMBRANE	729	765	22	22	0.21	0.3	0.68	1.02	1	1	0.913	0.45	1	0.928	4820	5598
VESICULAR_FRACTION	702	766	26	26	0.22	0.35	0.71	1.25	1	1	0.909	0.15	1	0.757	6253	3345
VIRAL_GENOME_REPLICATION	6	767	16	16	0.51	0.27	1.55	0.85	0.997	1	0.02	0.696	0.898	0.997	2345	5443
VIRAL_INFECTIOUS_CYCLE	8	768	21	21	0.49	0.21	1.54	0.71	0.998	1	0.014	0.886	0.76	1	3339	5443
VIRAL_REPRODUCTION	20	769	29	29	0.44	0.24	1.46	0.87	1	1	0.021	0.711	0.648	0.991	2345	5443
VIRAL_REPRODUCTIVE_PROCESS	9	770	25	25	0.46	0.24	1.53	0.83	0.998	1	0.013	0.751	0.704	1	2345	5443
VOLTAGE_GATED_CATION_CHANNEL_ACTIVITY	597	771	38	38	0.24	0.21	0.83	0.78	1	1	0.788	0.852	1	1	5523	4144
VOLTAGE_GATED_CHANNEL_ACTIVITY	531	772	42	42	0.25	0.18	0.89	0.69	1	1	0.688	0.939	1	1	5523	6504
VOLTAGE_GATED_POTASSIUM_CHANNEL_ACTIVITY	570	773	23	23	0.26	0.22	0.86	0.75	1	1	0.727	0.845	1	1	5523	3913
VOLTAGE_GATED_POTASSIUM_CHANNEL_COMPLEX	533	1	27	27	0.27	0.18	0.89	0.63	1	1	0.678	0.954	1	0.999	5287	6814
WOUND_HEALING	517	2	42	42	0.25	0.15	0.9	0.59	1	1	0.698	0.985	1	1	3748	7140
ZINC_ION_BINDING	215	3	58	58	0.31	0.2	1.13	0.78	1	1	0.247	0.884	0.852	1	5307	3450
